# Supplementary material
Source: PubMed Central journal article supplement (PMC6583054)
Supplement: jama-e185725-s003.pdf [file jama-e185725-s003.pdf]

## Supplementary Online Content

Askie LM, Darlow BA, Finer N, et al; for the Neonatal Oxygenation Prospective Meta-analysis (NeOProm) Collaboration. Association between oxygen saturation targeting and death or disability in extremely preterm infants in the neonatal oxygenation prospective meta-analysis collaboration. *JAMA*. doi:10.1001/jama.2018.5725

Baseline characteristics

Primary outcome

Secondary outcomes

Subgroup variables

eTable 1. Characteristics of randomized trials included in the NeOProm Collaboration

eFigure 1. Oximeter adjustment to maintain treatment allocation blinding

eTable 2. Overall survival analysis

eFigure 2. Cumulative incidence curve of death by treatment group to 3 months age

eTable 3. Subgroup numbers by trial

eTable 4. Death or major disability (primary analysis), by subgroups

eTable 5. Death or major disability (supportive analysis), by subgroups

eTable 6. Death or major disability (secondary analysis), by subgroups

eTable 7. Death or major disability (trialist defined), by subgroups

eTable 8. Major disability (primary analysis), by subgroups

eTable 9. Major disability (supportive analysis), by subgroups

eTable 10. Major disability (secondary analysis), by subgroups

eTable 11. Major disability (trialist defined), by subgroups

eTable 12. Cerebral palsy with GMFCS  $\geq 2$ , by subgroups

eTable 13. Severe visual impairment (trialist defined), by subgroups

eTable 14. Deafness requiring hearing aids or worse, by subgroups

eTable 15. Death prior to 18-24 months' age corrected for prematurity, by subgroups

eTable 16. Death prior to 36 weeks' postmenstrual age, by subgroups

eTable 17. Death prior to discharge, by subgroups

eTable 18. Bayley-III language and/or cognitive  $<85$ , by subgroups

eTable 19. Bayley-III cognitive  $<85$ , by subgroups

eTable 20. Bayley-III language  $<85$ , by subgroups

eTable 21. Bayley-III language or cognitive  $<70$ , by subgroups

- eTable 22. Bayley-III cognitive <70, by subgroups
- eTable 23. Bayley-III language <70, by subgroups
- eTable 24. Patent ductus arteriosus (PDA) medically or surgically treated, by subgroups
- eTable 25. Patent ductus arteriosus (PDA) surgically treated, by subgroups
- eTable 26. Severe necrotizing enterocolitis (NEC), by subgroups
- eTable 27. Treated retinopathy of prematurity (ROP), by subgroups
- eTable 28. Positive airway pressure with endotracheal tube (ETT) at 36 weeks' postmenstrual age (PMA), by subgroups
- eTable 29. Positive airway pressure without endotracheal tube (ETT) at 36 weeks' postmenstrual age (PMA), by subgroups
- eTable 30. Supplemental oxygen without positive airway pressure at 36 weeks, by subgroups
- eTable 31. Discharged home on oxygen, by subgroups
- eTable 32. Re-admission to hospital, by subgroups
- eTable 33. Outcomes, by SUPPORT-defined small for gestational age (SGA) subgroups
- eTable 34. Primary and secondary outcomes using random effects models

## References

This supplementary material has been provided by the authors to give readers additional information about their work.

## NeOProM variables collected and outcome definitions

### Baseline characteristics

- Trial numbers
- Gender: male / female
- Gestational age at birth (weeks)
- Birthweight (g)
- Small for gestational age (trialist defined): no / yes
- Small for gestational age (NeOProM defined): no / yes. Less than 10<sup>th</sup> percentile using charts from Kramer et al.<sup>1</sup>
- Multiple birth: no / yes
- Inborn: no / yes
- Admission temperature (Celsius)
- Apgar score at 5 minutes after birth
- Inspired oxygen concentration immediately prior to randomisation (%)
- Use of antenatal corticosteroids: no / yes (partial course) / yes (full course)
- Mode of delivery: vaginal – normal / vaginal – instrumental / Caesarean
- Respiratory support before randomization: positive airway pressure with endotracheal tube / positive airway pressure without endotracheal tube / supplemental oxygen without airway positive airway pressure / no respiratory support

### Primary outcome

\* Analyses adjusted for trials and multiple births

- **Death or major disability by 18-24 months' age, corrected for prematurity: Primary analysis (using Bayley-III cognitive and/or language <85 only).**  
Primary outcome as pre-specified in published NeOProM protocol: composite outcome of death or major disability by 18-24 months' age, corrected for prematurity. Major disability is any of the following: Bayley-III Developmental Assessment cognitive score <85 and/or language score <85; severe visual loss; cerebral palsy with GMFCS level 2 or higher at 18-24 months' age, corrected for prematurity; or deafness requiring hearing aids.
- **Death or major disability by 18-24 months' age, corrected for prematurity: Supportive analysis (using alternative cognitive function measures where B-III is unavailable).**  
Supportive analysis of primary outcome: including using alternative sources of information for classifying major disability as used within individual trials. This may have included a Bayley-II MDI score <70, or another validated assessment tool (e.g. Griffiths test), or a paediatrician assessment, or parent-reported measure of neurodevelopmental impairment (e.g. able to speak less than 5-10 words) or other measures.
- **Death or major disability by 18-24 months' age, corrected for prematurity: Secondary analysis (using Bayley-III cognitive and/or language <70 only).**  
Secondary analysis: composite outcome of death or major disability by 18-24 months' age, corrected for prematurity. Major disability is any of the following: Bayley-III Developmental Assessment cognitive score <70 and/or language score <70; severe visual loss; cerebral palsy with GMFCS level 2 or higher at 18-24 months' age, corrected for prematurity; or deafness requiring hearing aids.
- **Death or major disability by 18-24 months' age, corrected for prematurity: Trialist definition.**  
Trialist defined analysis: primary outcome as defined by trialists - includes alternative measures of disability as described in 'supportive analysis of primary outcome'.

## Secondary outcomes

\* Analyses adjusted for trials and multiple births

### Major disability by 18-24 months' age, corrected for prematurity

- **Major disability by 18-24 months' age, corrected for prematurity: Primary Analysis**  
Major disability by 18-24 months' age, corrected for prematurity. Major disability is any of the following: Bayley-III Developmental Assessment cognitive score <85 and/or language score <85; severe visual loss; cerebral palsy with GMFCS level 2 or higher at 18-24 months' age, corrected for prematurity; or deafness requiring hearing aids.
- **Major disability by 18-24 months' age, corrected for prematurity: Supportive analysis of primary outcome**  
Including using alternative sources of information for classifying major disability as used within individual trials. This may have included a Bayley-II MDI score <70, or another validated assessment tool (e.g. Griffiths test), or a paediatrician assessment, or parent-reported measure of neurodevelopmental impairment (e.g. able to speak less than 5-10 words) or other measures.
- **Major disability by 18-24 months' age, corrected for prematurity: Secondary Analysis**  
Major disability by 18-24 months' age, corrected for prematurity. Major disability is any of the following: Bayley-III Developmental Assessment cognitive score <70 and/or language score <70; severe visual loss; cerebral palsy with GMFCS level 2 or higher at 18-24 months' age, corrected for prematurity; or deafness requiring hearing aids.
- **Major disability by 18-24 months' age, corrected for prematurity: Trialist definition**  
Major disability defined by trialists - includes alternative measures of disability as described in 'supportive analysis of primary outcome'
- Cerebral Palsy with GMFCS  $\geq 2$ . Includes infants with cerebral palsy diagnosis but GMFCS was unknown
- Severe visual impairment as defined by trialists
- Deafness requiring hearing aids or worse

### Death

- Death prior to 18-24 months' age, corrected for prematurity
- Death prior to 36 weeks' postmenstrual age
- Death prior to discharge from hospital

### Overall survival

- Overall survival. Hazard ratio stratified by trial.

### Bayley-III scores at 18-24 months' age, corrected for prematurity

- Bayley-III cognitive score and/or language score <85 at 18-24 months' age, corrected for prematurity
- Bayley-III cognitive score <85 at 18-24 months' age, corrected for prematurity
- Bayley-III language score <85 at 18-24 months' age, corrected for prematurity
- Bayley-III cognitive score and/or language score <70 at 18-24 months' age, corrected for prematurity
- Bayley-III cognitive score <70 at 18-24 months' age, corrected for prematurity
- Bayley-III language score <70 at 18-24 months' age, corrected for prematurity
- Quantitative Bayley-III scores: Cognitive composite  
Excludes infants where values of Bayley-III were imputed for infants who had unsuccessful Bayley-III assessments due to severe developmental delay or autism
- Quantitative Bayley-III scores: Language composite  
Excludes infants where values of Bayley-III were imputed for infants who had unsuccessful Bayley-III assessments due to severe developmental delay or autism

- Quantitative Bayley-III scores: Language: Receptive communication  
Excludes infants where values of Bayley-III were imputed for infants who had unsuccessful Bayley-III assessments due to severe developmental delay or autism
- Quantitative Bayley-III scores: Language: Expressive communication  
Excludes infants where values of Bayley-III were imputed for infants who had unsuccessful Bayley-III assessments due to severe developmental delay or autism

#### **PDA, severe NEC and treated ROP**

- Patent ductus arteriosus (PDA) diagnosed by ultrasound and receiving medical or surgical treatment. Not necessarily diagnosed by ultrasound for SUPPORT, BOOST-NZ, BOOST-II UK, BOOST-II AUS.
- Patent ductus arteriosus (PDA) receiving surgical treatment
- Necrotizing enterocolitis (NEC) receiving surgery or leading to death. NEC receiving surgery only for COT.
- Retinopathy of prematurity (ROP) treatment by laser photocoagulation or cryotherapy or anti-VEGF injection (one or both eyes)

#### **Respiratory support**

- Positive airway pressure with endotracheal tube at 36 weeks' postmenstrual age
- Positive airway pressure without endotracheal tube at 36 weeks' postmenstrual age
- Supplemental oxygen without positive airway pressure at 36 weeks' postmenstrual age: SUPPORT and UK trials used a physiologic test to determine need for supplemental oxygen whilst the other trials did not
- Discharged home on any supplemental oxygen therapy: yes/no
- Postmenstrual age (weeks) infant ceased use of positive airway pressure with endotracheal tube: not available for SUPPORT or BOOST-II UK
- Postmenstrual age (weeks) infant ceased use of positive airway pressure without endotracheal tube: not available for SUPPORT or BOOST-II UK
- Postmenstrual age (weeks) infant ceased use of supplemental oxygen without airway pressure: not available for SUPPORT

#### **Re-admission to hospital**

- One or more re-admissions to hospital by 18-24 months' age, corrected for prematurity

#### **Subgroup variables**

- Gestational Age: <26 weeks / ≥26 weeks
- Inborn / Outborn
- Mode of Delivery: vaginal / Caesarean
- Use of Antenatal Corticosteroids: no / yes
- Gender: male / female
- Multiple birth: no / yes
- Time of Intervention Commencement: <6 hours / ≥6 hours
- Oximeter Software Type: original / revised / mixed
- Small for gestational age (trialist defined): no / yes. Using trial-specific SGA definitions.
- Small for gestational age (NeOProM defined): no / yes. Less than 10<sup>th</sup> percentile using charts from Kramer et al.<sup>1</sup>

eTable 1. Characteristics of randomized trials included in the NeOProm Collaboration

| Acronym                                                                           | NeOProm <sup>2</sup>                                                                                                                                                                                                                      | BOOST-II Australia <sup>3</sup>                                                                                                    | BOOST-II UK <sup>4</sup>                                                                                                                 | BOOST-NZ <sup>5</sup>                                                                                                               | SUPPORT <sup>6</sup>                                                                                                                                                                    | COT <sup>7</sup>                                                                                                                     |
|-----------------------------------------------------------------------------------|-------------------------------------------------------------------------------------------------------------------------------------------------------------------------------------------------------------------------------------------|------------------------------------------------------------------------------------------------------------------------------------|------------------------------------------------------------------------------------------------------------------------------------------|-------------------------------------------------------------------------------------------------------------------------------------|-----------------------------------------------------------------------------------------------------------------------------------------------------------------------------------------|--------------------------------------------------------------------------------------------------------------------------------------|
| <b>Characteristics of randomized trials included in the NeOProm Collaboration</b> |                                                                                                                                                                                                                                           |                                                                                                                                    |                                                                                                                                          |                                                                                                                                     |                                                                                                                                                                                         |                                                                                                                                      |
| Registration number                                                               | NCT01124331                                                                                                                                                                                                                               | ACTRN12605000055606                                                                                                                | ISRCTN00842661                                                                                                                           | ACTRN12605000253606                                                                                                                 | NCT00233324                                                                                                                                                                             | ISRCTN62491227                                                                                                                       |
| Funding                                                                           | Supported by the NHMRC Clinical Trials Centre, University of Sydney, Australia; and by a grant (R03HD 079867) from the Eunice Kennedy Shriver National Institute of Child Health and Human Development National Institutes of Health, USA | Funded by the Australian National Health and Medical Research Council.                                                             | Funded by the UK Medical Research Council and managed by the UK National Institute for Health Research.                                  | Funded by New Zealand Health Research Council and the Child Health Research Foundation (Cure Kids).                                 | Funded by the USA Eunice Kennedy Shriver National Institute of Child Health and Human Development; the National Heart, Lung and Blood Institute; and the National Institutes of Health. | Funded by Canadian Institutes of Health Research.                                                                                    |
| Planned sample size                                                               | 5230                                                                                                                                                                                                                                      | 1200                                                                                                                               | 1200                                                                                                                                     | 320                                                                                                                                 | 1310                                                                                                                                                                                    | 1200                                                                                                                                 |
| Actual sample size                                                                | 4965                                                                                                                                                                                                                                      | 1135                                                                                                                               | 973                                                                                                                                      | 340                                                                                                                                 | 1316                                                                                                                                                                                    | 1201                                                                                                                                 |
| Countries of recruitment                                                          |                                                                                                                                                                                                                                           | Australia                                                                                                                          | United Kingdom                                                                                                                           | New Zealand                                                                                                                         | United States of America                                                                                                                                                                | Canada, USA, Argentina, Germany, Israel, Finland                                                                                     |
| Enrolment and follow-up periods                                                   |                                                                                                                                                                                                                                           | Enrolment was undertaken from March 2006 until December 2010. Follow-up assessments began in August 2008 and ended in August 2013. | Enrolment was undertaken from September 2007 until December 2010. Follow-up assessments began in December 2009 and ended in August 2014. | Enrolment was undertaken from September 2006 until December 2009. Follow-up assessments began in March 2009 and ended in June 2012. | Enrolment was undertaken from February 2005 until February 2009. Follow-up assessments began in November 2006 and ended in July 2011.                                                   | Enrolment was undertaken from December 2006 until August 2010. Follow-up assessments began in October 2008 and ended in August 2012. |
| Study design                                                                      | Prospectively planned individual participant data meta-analysis                                                                                                                                                                           | Randomized multicenter trial                                                                                                       | Randomized multicenter trial                                                                                                             | Randomized multicenter trial                                                                                                        | Randomized multicenter trial with a 2-by-2 factorial design                                                                                                                             | Randomized multicenter trial                                                                                                         |
| How were multiple births randomized?                                              |                                                                                                                                                                                                                                           | Siblings within multiple births were randomised individually.                                                                      | Siblings within multiple births were randomised individually.                                                                            | Siblings within multiple births were randomised individually.                                                                       | Multiple births were randomised to the same group.                                                                                                                                      | Siblings within multiple births were randomised individually.                                                                        |

eTable 1. Characteristics of randomized trials included in the NeOProm Collaboration (continued)

| Acronym                            | NeOProm <sup>2</sup> | BOOST-II Australia <sup>3</sup>                                                                                                                                                                           | BOOST-II UK <sup>4</sup>                                                                                                                                                                                                                            | BOOST-NZ <sup>5</sup>                                                                                                                                                                | SUPPORT <sup>6</sup>                                                                                                                                                 | COT <sup>7</sup>                                                                                                                                                                                                                                                                                                                                                                                                                                                        |
|------------------------------------|----------------------|-----------------------------------------------------------------------------------------------------------------------------------------------------------------------------------------------------------|-----------------------------------------------------------------------------------------------------------------------------------------------------------------------------------------------------------------------------------------------------|--------------------------------------------------------------------------------------------------------------------------------------------------------------------------------------|----------------------------------------------------------------------------------------------------------------------------------------------------------------------|-------------------------------------------------------------------------------------------------------------------------------------------------------------------------------------------------------------------------------------------------------------------------------------------------------------------------------------------------------------------------------------------------------------------------------------------------------------------------|
| Participants                       |                      | Infants < 28 wks gestation inborn or outborn < 24 hrs old                                                                                                                                                 | Infants < 28 wks gestation < 12 hrs old (24 hrs if outborn)                                                                                                                                                                                         | Infants < 28 wks gestation inborn or outborn < 24 hrs old                                                                                                                            | Infants 24-27 wks gestation, < 2 hrs old                                                                                                                             | Infants 23 0/7-27 6/7 wks gestation < 24 hrs old                                                                                                                                                                                                                                                                                                                                                                                                                        |
| Blinded?                           |                      | Yes                                                                                                                                                                                                       | Yes                                                                                                                                                                                                                                                 | Yes                                                                                                                                                                                  | Yes                                                                                                                                                                  | Yes                                                                                                                                                                                                                                                                                                                                                                                                                                                                     |
| Intervention                       |                      | Lower oxygen saturation target (85%-89%)                                                                                                                                                                  | Lower oxygen saturation target (85%-89%)                                                                                                                                                                                                            | Lower oxygen saturation target (85%-89%)                                                                                                                                             | Lower oxygen saturation target (85%-89%)                                                                                                                             | Lower oxygen saturation target (85%-89%)                                                                                                                                                                                                                                                                                                                                                                                                                                |
| Comparator                         |                      | Higher oxygen saturation target (91%-95%)                                                                                                                                                                 | Higher oxygen saturation target (91%-95%)                                                                                                                                                                                                           | Higher oxygen saturation target (91%-95%)                                                                                                                                            | Higher oxygen saturation target (91%-95%)                                                                                                                            | Higher oxygen saturation target (91%-95%)                                                                                                                                                                                                                                                                                                                                                                                                                               |
| Intervention & comparator duration |                      | Oximeter applied after randomisation, asap after admission to NICU, continued for minimum 2 wks. Thereafter continued until 36 wks pma or SpO <sub>2</sub> > 96% in room air for 95% of time over 3 days. | Oximeter applied from randomisation until postmenstrual age (pma) of 36 wks or until baby was breathing air. All monitoring at any time prior to 36 wks pma was done using study oximeter. BPD defined at 36 wks using a physiological oxygen test. | Oximeter applied asap after admission to NICU, continued for minimum 2 wks. Thereafter continued until 36 wks pma or SpO <sub>2</sub> > 96% in room air for 95% of time over 3 days. | Oximeter applied within 2 hrs following admission to NICU until infant has been in room air for 72 hrs or until 36 wks pma age, assessed by physiologic oxygen test. | Oximeter applied from day of birth until a min 36 wks pma. If breathing room air without any form of respiratory assistance from 35 wks pma onward, study oximetry discontinued at 36 wks pma. If receiving any form of respiratory assistance &/or oxygen therapy from 35 wks pma onward study oximetry continued until 40 wks pma. Study oximetry stopped at any time before 40 wks pma if baby discharged home (with or without respiratory assistance &/or oxygen). |

eTable 1. Characteristics of randomized trials included in the NeOProM Collaboration (continued)

| Acronym                                                                                                                              | NeOProM <sup>2</sup>                                                                                                                                                                                                                                                                                                                              | BOOST-II Australia <sup>3</sup>                                                                                                                                                                                                                                                                      | BOOST-II UK <sup>4</sup>                                                                                                                                                                                                                                                                                                             | BOOST-NZ <sup>5</sup>                                                                                                                                                                                                                                                                                                                                 | SUPPORT <sup>6</sup>                                                                                                                                                                                                                                                                                                                                 | COT <sup>7</sup>                                                                                                                                                                                                                                                                                                                 |
|--------------------------------------------------------------------------------------------------------------------------------------|---------------------------------------------------------------------------------------------------------------------------------------------------------------------------------------------------------------------------------------------------------------------------------------------------------------------------------------------------|------------------------------------------------------------------------------------------------------------------------------------------------------------------------------------------------------------------------------------------------------------------------------------------------------|--------------------------------------------------------------------------------------------------------------------------------------------------------------------------------------------------------------------------------------------------------------------------------------------------------------------------------------|-------------------------------------------------------------------------------------------------------------------------------------------------------------------------------------------------------------------------------------------------------------------------------------------------------------------------------------------------------|------------------------------------------------------------------------------------------------------------------------------------------------------------------------------------------------------------------------------------------------------------------------------------------------------------------------------------------------------|----------------------------------------------------------------------------------------------------------------------------------------------------------------------------------------------------------------------------------------------------------------------------------------------------------------------------------|
| <b>Primary outcome of death or major disability at 18-24 months corrected age as defined by each trial and NeOProM Collaboration</b> |                                                                                                                                                                                                                                                                                                                                                   |                                                                                                                                                                                                                                                                                                      |                                                                                                                                                                                                                                                                                                                                      |                                                                                                                                                                                                                                                                                                                                                       |                                                                                                                                                                                                                                                                                                                                                      |                                                                                                                                                                                                                                                                                                                                  |
| Primary outcome(s)                                                                                                                   | Death or major disability by 18-24 months corrected for prematurity. Major disability is any of the following:<br>* BSID-3 Developmental Assessment cognitive score <85 and/or language score <85<br>* severe visual loss<br>* cerebral palsy with GMFCS level 2 or higher at 18-24 months postmenstrual age<br>* deafness requiring hearing aids | Death or survival with major disability at 2 yrs corrected for prematurity. Major disability defined as having any of the following:<br>* cognitive or language score <85 on BSID-3<br>* severe visual loss<br>* cerebral palsy with inability to walk at 2 yrs<br>* deafness requiring hearing aids | Death or survival with major disability at 2 yrs corrected for prematurity. Major disability defined as having any of the following:<br>* cognitive or language score <85 on BSID-3<br>* severe visual loss<br>* cerebral palsy with inability to walk at 2 yrs<br>* deafness requiring (or too severe to benefit from) hearing aids | Death or survival with major disability at 2 yrs corrected for prematurity. Major disability defined as having any of the following:<br>* composite cognitive language score Bayley-III<85 or MDI<70 on the Bayley-II assessment.<br>* severe visual loss<br>* cerebral palsy defined as GMFCS level 2 or higher<br>* deafness requiring hearing aids | 1. Death or survival with neurodevelopmental impairment (defined as either cognitive score on BSID-3 <70, GMFCS level 2 or higher, moderate to severe CP, hearing impairment or bilateral visual impairment) at 18-22 months corrected for prematurity.<br>2. Survival without severe ROP (threshold ROP and/or the need for surgical intervention). | Death or survival with major disability at 18-21 months corrected for prematurity. Major disability defined as having any of the following:<br>* cognitive score <85 and/or language score <85 on BSID-3<br>* severe visual loss<br>* gross motor disability with a GMFCS level 2 or higher<br>* deafness requiring hearing aids |
| Death                                                                                                                                | At 18-24 months corrected for prematurity                                                                                                                                                                                                                                                                                                         | At 24 months corrected for prematurity                                                                                                                                                                                                                                                               | At 24 months corrected for prematurity                                                                                                                                                                                                                                                                                               | At 24 months corrected for prematurity                                                                                                                                                                                                                                                                                                                | At 24 months corrected for prematurity                                                                                                                                                                                                                                                                                                               | At 18 months corrected for prematurity                                                                                                                                                                                                                                                                                           |
| Cognitive or language delay                                                                                                          | Composite cognitive or language score <85 on Bayley-III                                                                                                                                                                                                                                                                                           | Composite cognitive language score Bayley-III<85 or MDI<70 on the Bayley-II assessment. If Bayley-III or Bayley-II are missing the final criterion were replaced by any one of the following:<br>uses <10 words; or language problems                                                                | Combined language or cognitive score of <85 using Bayley-III. Alternative measures were used in some cases including WPPSI-III, Denver Developmental Screening Test, Griffiths Mental Development Scales, Schedule of                                                                                                                | Composite cognitive language score Bayley-III<85 or MDI<70 on the Bayley-II assessment. If Bayley-III or Bayley-II are missing the final criterion were replaced by any one of the following:<br>uses <10 words; or language problems                                                                                                                 | Cognitive composite score on Bayley-III<70.                                                                                                                                                                                                                                                                                                          | Composite cognitive and/or language score <85 on Bayley-III.                                                                                                                                                                                                                                                                     |



eTable 1. Characteristics of randomized trials included in the NeOProM Collaboration (continued)

| Acronym                | NeOProM <sup>2</sup>    | BOOST-II Australia <sup>3</sup>                                                                       | BOOST-II UK <sup>4</sup>                                                                                                                                                                                                                                                                                                                                          | BOOST-NZ <sup>5</sup>                                                                                 | SUPPORT <sup>6</sup>                                                                                                                                                                                                           | COT <sup>7</sup>                                                                                                       |
|------------------------|-------------------------|-------------------------------------------------------------------------------------------------------|-------------------------------------------------------------------------------------------------------------------------------------------------------------------------------------------------------------------------------------------------------------------------------------------------------------------------------------------------------------------|-------------------------------------------------------------------------------------------------------|--------------------------------------------------------------------------------------------------------------------------------------------------------------------------------------------------------------------------------|------------------------------------------------------------------------------------------------------------------------|
|                        |                         | indicated on the short health assessment, delayed development by >12 months, other severe impairment. | Growing Skills (SGS), PARCA-R, use of fewer than 5 words, or assessed by paediatrician or GP to have more than 6 mths developmental delay by 24 months corrected for prematurity. Information from health professionals/ parents was assessed independently by 2 assessors masked to group assignment to adjudicate cognitive outcome in a small number of cases. | indicated on the short health assessment, delayed development by >12 months, other severe impairment. |                                                                                                                                                                                                                                |                                                                                                                        |
| Gross motor disability | GMFCS level 2 or higher | GMFCS level 2 or higher, as indicated on the health status or short health status assessments         | Severe cerebral palsy (unable to walk without help at 2 years)                                                                                                                                                                                                                                                                                                    | GMFCS level 2 or higher, as indicated on the health status or short health status assessments         | Moderate to severe cerebral palsy defined as a non-progressive disorder with abnormal muscle tone in at least one arm or leg that was associated with abnormal control of movement or posture and a GMFCS score of 2 or higher | Level 2 or higher according to GMFCS. Normal level is assigned if a child can walk 10 steps independently at 18 months |

eTable 1. Characteristics of randomized trials included in the NeOProM Collaboration (continued)

| Acronym                                                                          | NeOProM <sup>2</sup>                                                                                                                                                                                      | BOOST-II Australia <sup>3</sup>                                                                                                                | BOOST-II UK <sup>4</sup>                                                                            | BOOST-NZ <sup>5</sup>                                                                                                                          | SUPPORT <sup>6</sup>                                                                                                  | COT <sup>7</sup>                                                                                                                                             |
|----------------------------------------------------------------------------------|-----------------------------------------------------------------------------------------------------------------------------------------------------------------------------------------------------------|------------------------------------------------------------------------------------------------------------------------------------------------|-----------------------------------------------------------------------------------------------------|------------------------------------------------------------------------------------------------------------------------------------------------|-----------------------------------------------------------------------------------------------------------------------|--------------------------------------------------------------------------------------------------------------------------------------------------------------|
| Severe hearing loss                                                              | Deafness requiring hearing aids                                                                                                                                                                           | Requiring hearing aids, as indicated on the health status or short health status assessments                                                   | Deafness requiring (or too severe to benefit from) a hearing aid                                    | Requiring hearing aids, as indicated on the health status or short health status assessments                                                   | The inability to understand oral directions of the examiner and to communicate, with or without hearing amplification | Prescribed hearing aids or cochlear implants                                                                                                                 |
| Severe visual impairment                                                         | Severe visual impairment as defined by trialists                                                                                                                                                          | Legal blindness, as indicated on the health status or short health status assessments                                                          | Severe visual loss certifiable as legally blind or partially sighted                                | Legal blindness, as indicated on the health status or short health status assessments                                                          | Vision worse than 20/200                                                                                              | Corrected visual acuity <20/200 in the better eye                                                                                                            |
| <b>Secondary outcomes as defined by each trial and the NeOProM Collaboration</b> |                                                                                                                                                                                                           |                                                                                                                                                |                                                                                                     |                                                                                                                                                |                                                                                                                       |                                                                                                                                                              |
| Measures of respiratory support                                                  | Supplemental oxygen requirement at 36 postmenstrual age; postmenstrual age ceased endotracheal intubation, continuous positive airway pressure (CPAP), supplemental oxygen, and home oxygen (if received) | Stop date recorded when used for ≥30 minutes for endotracheal intubation, CPAP and supplemental oxygen. Last date of home oxygen use recorded. | Stop date not collected for endotracheal intubation or CPAP. Last date of home oxygen use recorded. | Last date recorded when used for ≥30 minutes for endotracheal intubation, CPAP and supplemental oxygen. Last date of home oxygen use recorded. | Stop date not collected for endotracheal intubation, CPAP or supplemental oxygen use past 36 weeks postmenstrual age. | Final stop date recorded for endotracheal intubation, CPAP and supplemental oxygen including use of supplemental oxygen or positive airway pressure at home. |
| PDA diagnosed by ultrasound and receiving any treatment                          | PDA diagnosed by ultrasound and receiving any treatment                                                                                                                                                   | PDA diagnosed by ultrasound                                                                                                                    | PDA diagnosed, but not necessarily by ultrasound                                                    | PDA diagnosed by ultrasound                                                                                                                    | PDA diagnosed, but not necessarily by ultrasound                                                                      | Any diagnosis of PDA receiving therapy                                                                                                                       |
| PDA receiving surgical treatment                                                 | PDA diagnosed by ultrasound and receiving surgical treatment                                                                                                                                              | PDA requiring surgical ligation                                                                                                                | PDA requiring surgery                                                                               | PDA requiring surgical ligation                                                                                                                | PDA requiring surgery                                                                                                 | PDA requiring surgical ligation                                                                                                                              |

eTable 1. Characteristics of randomized trials included in the NeOProM Collaboration (continued)

| Acronym                                   | NeOProM <sup>2</sup>                                                                                            | BOOST-II Australia <sup>3</sup>                                | BOOST-II UK <sup>4</sup>                                                                          | BOOST-NZ <sup>5</sup>                                          | SUPPORT <sup>6</sup>                                                                                                                                                                                                     | COT <sup>7</sup>                                                                                                          |
|-------------------------------------------|-----------------------------------------------------------------------------------------------------------------|----------------------------------------------------------------|---------------------------------------------------------------------------------------------------|----------------------------------------------------------------|--------------------------------------------------------------------------------------------------------------------------------------------------------------------------------------------------------------------------|---------------------------------------------------------------------------------------------------------------------------|
| NEC requiring surgery or leading to death | NEC requiring surgery or leading to death                                                                       | NEC requiring surgery or leading to death                      | NEC requiring surgery or leading to death                                                         | NEC requiring surgery or leading to death                      | Modified Bell's stage $\geq 2$ on a scale ranging from 1-3                                                                                                                                                               | Diagnosed during surgery or by a finding of pneumatosis intestinalis, hepatobiliary gas or free intraperitoneal air on XR |
| Cerebral palsy                            | Cerebral palsy with GMFCS level 2 or higher or MACS level 2 or higher at 18-24 months corrected for prematurity | Cerebral palsy with GMFCS score $\geq$ level 2                 | Unable to walk without help at 2 years (MACS level 1 or higher) and/or GMFCS score $\geq$ level 2 | Cerebral palsy with GMFCS score $\geq$ level 2                 | Moderate to severe cerebral palsy defined as a non-progressive disorder with abnormal muscle tone in at least one arm or leg that was associated with abnormal control of movement or posture and a GMFCS score $\geq 2$ | Level 2 or higher according to GMFCS. Normal level is assigned if a child can walk 10 steps independently at 18 months    |
| Re-admissions to hospital                 | One or more re-admissions to hospital up to 18-24 months corrected for prematurity                              | Re-admissions to hospital at 2 years corrected for prematurity | Re-admissions to hospital until 2 years after delivery was due (and cause)                        | Re-admissions to hospital at 2 years corrected for prematurity | Re-admissions to hospital at 2 years corrected for prematurity                                                                                                                                                           | Re-admission to hospital – available for children whose family provided a standardised medical history at 18 months       |

### Abbreviations

NeOProM: Neonatal Oxygenation Prospective Meta-analysis; BOOST: Benefits of Oxygen Saturation Targeting; UK: United Kingdom; NZ: New Zealand; SUPPORT: Surfactant Positive Airway Pressure and Pulse Oximetry Trial; COT: Canadian Oxygen Trial; NHMRC: National Health and Medical Research Council; USA: United States of America; wks: weeks; hrs: hours; NICU: Neonatal intensive care unit; pma: postmenstrual age; SpO<sub>2</sub>: blood oxygen saturation level; BPD: bronchopulmonary dysplasia; asap: as soon as possible; min: minimum; BSID: Bayley Scales of Infant Development; GMFCS: Gross Motor Function Classification System; yrs: years; CP: cerebral palsy; ROP: retinopathy of prematurity; MDI: Mental Developmental Index; WPPSI: Wechsler Preschool and Primary Scale of Intelligence; SGS: Schedule of Growing Skills; PARCA-R: Parent Report of Children's Abilities-Revised; GP: General Practitioner; mths: months; CPAP: continuous positive airway pressure; PDA: patent ductus arteriosus; NEC: necrotizing enterocolitis; XR: x-ray; MACS: Manual Ability Classification System.

eFigure 1. Oximeter adjustment to maintain treatment allocation blinding

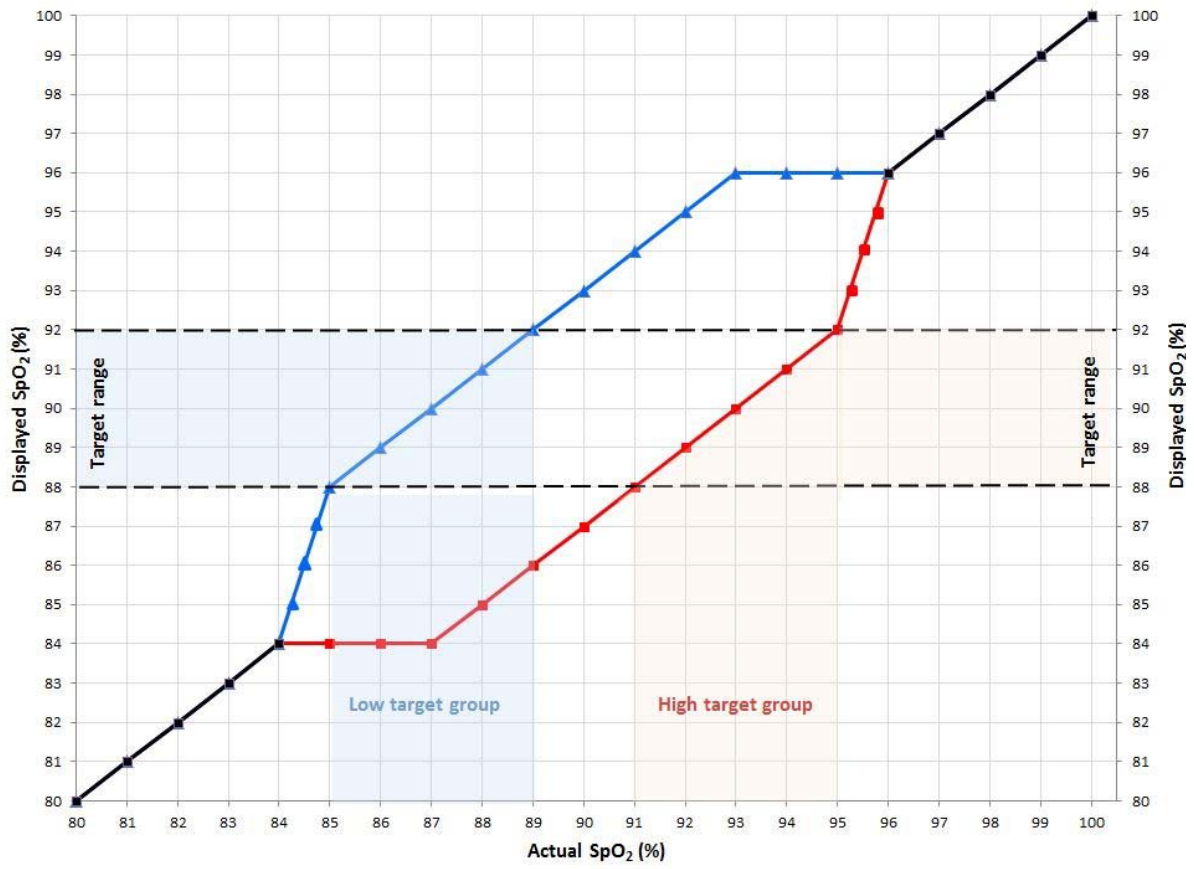

**Abbreviations**

SpO<sub>2</sub>: blood oxygen saturation level

**eTable 2. Overall survival analysis**

|              |                | Higher SpO <sub>2</sub> target | Lower SpO <sub>2</sub> target | Hazard Ratio*<br>(95% CI) | P-value      |
|--------------|----------------|--------------------------------|-------------------------------|---------------------------|--------------|
| <b>Death</b> | SUPPORT        | 118/662                        | 140/654                       | 1.23 (0.96-1.57)          | 0.098        |
|              | COT            | 88/599                         | 97/602                        | 1.10 (0.82-1.46)          | 0.528        |
|              | BOOST-NZ       | 27/170                         | 25/170                        | 0.91 (0.53-1.57)          | 0.737        |
|              | BOOST-II UK    | 98/487                         | 122/486                       | 1.26 (0.97-1.64)          | 0.089        |
|              | BOOST-II AUS   | 87/567                         | 100/568                       | 1.16 (0.87-1.54)          | 0.325        |
|              | <b>NeOProm</b> | <b>418/2485</b>                | <b>484/2480</b>               | <b>1.17 (1.03-1.34)</b>   | <b>0.017</b> |

**Abbreviations**

SUPPORT: Surfactant Positive Airway Pressure and Pulse Oximetry Trial; COT: Canadian Oxygen Trial; BOOST: Benefits of Oxygen Saturation Targeting; NZ: New Zealand; UK: United Kingdom; AUS: Australia; NeOProm: Neonatal Oxygenation Prospective Meta-analysis.

\*Hazard ratio (HR) stratified by trial. HR greater than 1 favors the higher SpO<sub>2</sub> target range.

**eFigure 2. Cumulative incidence curve of death by treatment group to 3 months age**

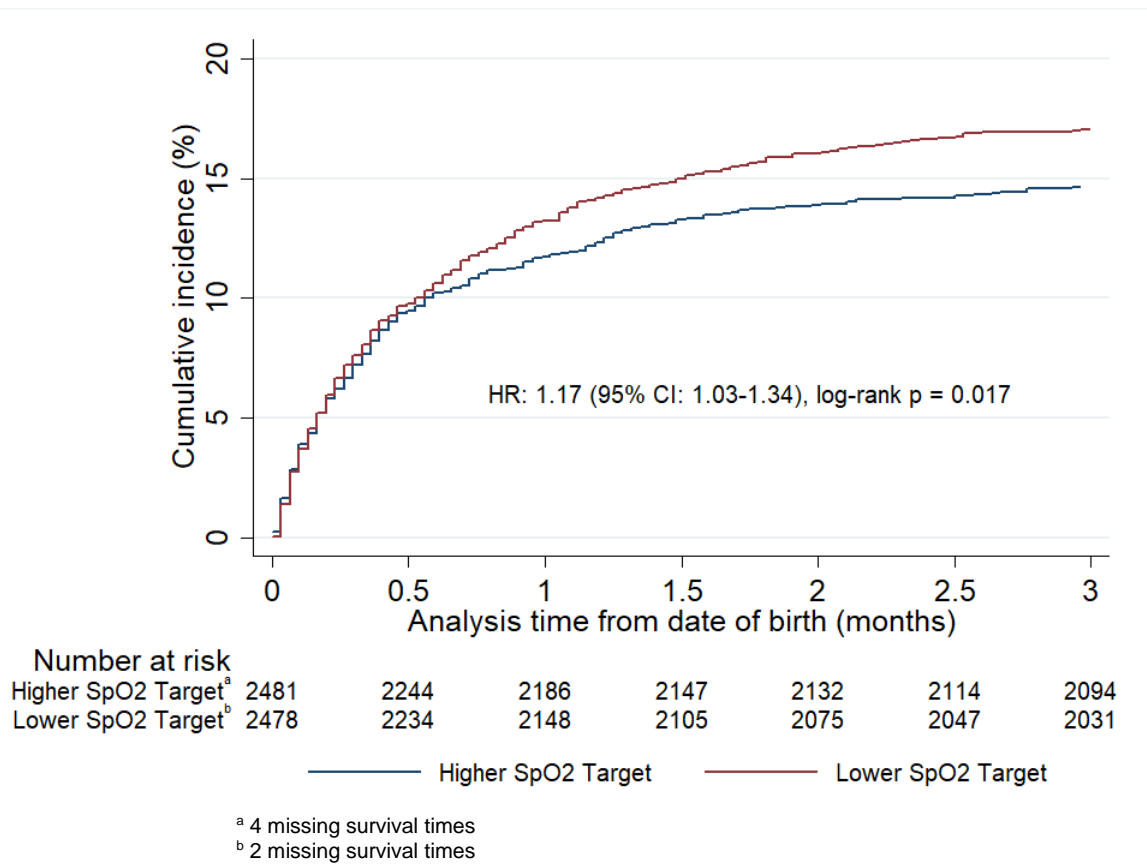

**Abbreviations**

HR: hazard ratio; CI: confidence interval. HR greater than 1 favors the higher SpO<sub>2</sub> target range.

## Pre-specified subgroup analyses

Table 3. Subgroup numbers by trial

|                                                    |                |                     | Lower oxygen<br>saturation target | Higher oxygen<br>saturation target | Total              |
|----------------------------------------------------|----------------|---------------------|-----------------------------------|------------------------------------|--------------------|
|                                                    |                |                     | N(%)                              | N(%)                               | N(%)               |
| <b>Gestational Age (&lt;26 weeks vs ≥26 weeks)</b> | SUPPORT        | <26 weeks           | 276 (42.2)                        | 289 (43.7)                         | 565 (42.9)         |
|                                                    |                | ≥26 weeks           | 378 (57.8)                        | 373 (56.3)                         | 751 (57.1)         |
|                                                    | COT            | <26 weeks           | 260 (43.2)                        | 252 (42.1)                         | 512 (42.6)         |
|                                                    |                | ≥26 weeks           | 342 (56.8)                        | 347 (57.9)                         | 689 (57.4)         |
|                                                    | BOOST-NZ       | <26 weeks           | 72 (42.4)                         | 72 (42.4)                          | 144 (42.4)         |
|                                                    |                | ≥26 weeks           | 98 (57.6)                         | 98 (57.6)                          | 196 (57.6)         |
|                                                    | BOOST-II UK    | <26 weeks           | 214 (44.0)                        | 217 (44.6)                         | 431 (44.3)         |
|                                                    |                | ≥26 weeks           | 272 (56.0)                        | 270 (55.4)                         | 542 (55.7)         |
|                                                    | BOOST-II AUS   | <26 weeks           | 241 (42.4)                        | 240 (42.3)                         | 481 (42.4)         |
|                                                    |                | ≥26 weeks           | 327 (57.6)                        | 327 (57.7)                         | 654 (57.6)         |
|                                                    | <b>NeOProM</b> | <b>&lt;26 weeks</b> | <b>1063 (42.9)</b>                | <b>1070 (43.1)</b>                 | <b>2133 (43.0)</b> |
|                                                    |                | <b>≥26 weeks</b>    | <b>1417 (57.1)</b>                | <b>1415 (56.9)</b>                 | <b>2832 (57.0)</b> |
| <b>Inborn vs Outborn<sup>a</sup></b>               | SUPPORT        | Inborn              | 654 (100.0)                       | 662 (100.0)                        | 1316 (100.0)       |
|                                                    |                | Outborn             | 0 (0.0)                           | 0 (0.0)                            | 0 (0.0)            |
|                                                    | COT            | Inborn              | 562 (93.4)                        | 543 (90.7)                         | 1105 (92.0)        |
|                                                    |                | Outborn             | 40 (6.6)                          | 56 (9.3)                           | 96 (8.0)           |
|                                                    | BOOST-NZ       | Inborn              | 159 (93.5)                        | 157 (92.4)                         | 316 (92.9)         |
|                                                    |                | Outborn             | 11 (6.5)                          | 13 (7.6)                           | 24 (7.1)           |
|                                                    | BOOST-II UK    | Inborn              | 428 (88.2)                        | 426 (87.7)                         | 854 (88.0)         |
|                                                    |                | Outborn             | 57 (11.8)                         | 60 (12.3)                          | 117 (12.0)         |
|                                                    | BOOST-II AUS   | Inborn              | 524 (92.3)                        | 525 (92.6)                         | 1049 (92.4)        |
|                                                    |                | Outborn             | 44 (7.7)                          | 42 (7.4)                           | 86 (7.6)           |
|                                                    | <b>NeOProM</b> | <b>Inborn</b>       | <b>2327 (93.9)</b>                | <b>2313 (93.1)</b>                 | <b>4640 (93.5)</b> |
|                                                    |                | <b>Outborn</b>      | <b>152 (6.1)</b>                  | <b>171 (6.9)</b>                   | <b>323 (6.5)</b>   |

eTable 3. Subgroup numbers by trial (continued)

|                         |                                             |                  | Lower oxygen<br>saturation target | Higher oxygen<br>saturation target | Total              |             |
|-------------------------|---------------------------------------------|------------------|-----------------------------------|------------------------------------|--------------------|-------------|
|                         |                                             |                  | N(%)                              | N(%)                               | N(%)               |             |
| <b>Mode of Delivery</b> | SUPPORT                                     | Vaginal          | 213 (32.6)                        | 220 (33.2)                         | 433 (32.9)         |             |
|                         |                                             | Caesarean        | 441 (67.4)                        | 442 (66.8)                         | 883 (67.1)         |             |
|                         | COT                                         | Vaginal          | 222 (37.1)                        | 243 (40.6)                         | 465 (38.8)         |             |
|                         |                                             | Caesarean        | 377 (62.9)                        | 355 (59.4)                         | 732 (61.2)         |             |
|                         | BOOST-NZ                                    | Vaginal          | 75 (44.1)                         | 79 (46.5)                          | 154 (45.3)         |             |
|                         |                                             | Caesarean        | 95 (55.9)                         | 91 (53.5)                          | 186 (54.7)         |             |
|                         | BOOST-II UK                                 | Vaginal          | 292 (60.2)                        | 301 (61.9)                         | 593 (61.1)         |             |
|                         |                                             | Caesarean        | 193 (39.8)                        | 185 (38.1)                         | 378 (38.9)         |             |
|                         | BOOST-II AUS                                | Vaginal          | 272 (48.1)                        | 257 (45.6)                         | 529 (46.9)         |             |
|                         |                                             | Caesarean        | 294 (51.9)                        | 306 (54.4)                         | 600 (53.1)         |             |
|                         | <b>NeOProM</b>                              | <b>Vaginal</b>   | <b>1074 (43.4)</b>                | <b>1100 (44.4)</b>                 | <b>2174 (43.9)</b> |             |
|                         |                                             | <b>Caesarean</b> | <b>1400 (56.6)</b>                | <b>1379 (55.6)</b>                 | <b>2779 (56.1)</b> |             |
|                         | <b>Use of Antenatal<br/>Corticosteroids</b> | SUPPORT          | No                                | 21 (3.2)                           | 29 (4.4)           | 50 (3.8)    |
|                         |                                             |                  | Yes                               | 633 (96.8)                         | 632 (95.6)         | 1265 (96.2) |
| COT                     |                                             | No               | 70 (11.7)                         | 61 (10.2)                          | 131 (10.9)         |             |
|                         |                                             | Yes              | 530 (88.3)                        | 536 (89.8)                         | 1066 (89.1)        |             |
| BOOST-NZ                |                                             | No               | 20 (11.8)                         | 18 (10.6)                          | 38 (11.2)          |             |
|                         |                                             | Yes              | 150 (88.2)                        | 152 (89.4)                         | 302 (88.8)         |             |
| BOOST-II UK             |                                             | No               | 40 (8.3)                          | 48 (9.9)                           | 88 (9.1)           |             |
|                         |                                             | Yes              | 443 (91.7)                        | 436 (90.1)                         | 879 (90.9)         |             |
| BOOST-II AUS            |                                             | No               | 64 (11.3)                         | 42 (7.5)                           | 106 (9.4)          |             |
|                         |                                             | Yes              | 501 (88.7)                        | 519 (92.5)                         | 1020 (90.6)        |             |
| <b>NeOProM</b>          |                                             | <b>No</b>        | <b>215 (8.7)</b>                  | <b>198 (8.0)</b>                   | <b>413 (8.4)</b>   |             |
|                         |                                             | <b>Yes</b>       | <b>2257 (91.3)</b>                | <b>2275 (92.0)</b>                 | <b>4532 (91.6)</b> |             |
| <b>Gender</b>           |                                             | SUPPORT          | Male                              | 341 (52.1)                         | 371 (56.0)         | 712 (54.1)  |
|                         |                                             |                  | Female                            | 313 (47.9)                         | 291 (44.0)         | 604 (45.9)  |
|                         | COT                                         | Male             | 329 (54.7)                        | 326 (54.4)                         | 655 (54.5)         |             |
|                         |                                             | Female           | 273 (45.3)                        | 273 (45.6)                         | 546 (45.5)         |             |
|                         | BOOST-NZ                                    | Male             | 90 (52.9)                         | 90 (52.9)                          | 180 (52.9)         |             |
|                         |                                             | Female           | 80 (47.1)                         | 80 (47.1)                          | 160 (47.1)         |             |

eTable 3. Subgroup numbers by trial (continued)

|                          |                                          |                | Lower oxygen saturation target | Higher oxygen saturation target | Total              |                    |
|--------------------------|------------------------------------------|----------------|--------------------------------|---------------------------------|--------------------|--------------------|
|                          |                                          |                | N(%)                           | N(%)                            | N(%)               |                    |
|                          | BOOST-II UK                              | Male           | 258 (53.1)                     | 259 (53.2)                      | 517 (53.1)         |                    |
|                          |                                          | Female         | 228 (46.9)                     | 228 (46.8)                      | 456 (46.9)         |                    |
|                          | BOOST-II AUS                             | Male           | 293 (51.6)                     | 296 (52.2)                      | 589 (51.9)         |                    |
|                          |                                          | Female         | 275 (48.4)                     | 271 (47.8)                      | 546 (48.1)         |                    |
|                          | <b>NeOProM</b>                           | <b>Male</b>    | <b>1311 (52.9)</b>             | <b>1342 (54.0)</b>              | <b>2653 (53.4)</b> |                    |
|                          |                                          | <b>Female</b>  | <b>1169 (47.1)</b>             | <b>1143 (46.0)</b>              | <b>2312 (46.6)</b> |                    |
| <b>Multiple Birth</b>    | SUPPORT                                  | No             | 493 (75.4)                     | 486 (73.4)                      | 979 (74.4)         |                    |
|                          |                                          | Yes            | 161 (24.6)                     | 176 (26.6)                      | 337 (25.6)         |                    |
|                          | COT                                      | No             | 396 (65.8)                     | 417 (69.6)                      | 813 (67.7)         |                    |
|                          |                                          | Yes            | 206 (34.2)                     | 182 (30.4)                      | 388 (32.3)         |                    |
|                          | BOOST-NZ                                 | No             | 124 (72.9)                     | 124 (72.9)                      | 248 (72.9)         |                    |
|                          |                                          | Yes            | 46 (27.1)                      | 46 (27.1)                       | 92 (27.1)          |                    |
|                          | BOOST-II UK                              | No             | 347 (71.5)                     | 350 (72.0)                      | 697 (71.8)         |                    |
|                          |                                          | Yes            | 138 (28.5)                     | 136 (28.0)                      | 274 (28.2)         |                    |
|                          | BOOST-II AUS                             | No             | 430 (75.7)                     | 432 (76.2)                      | 862 (75.9)         |                    |
|                          |                                          | Yes            | 138 (24.3)                     | 135 (23.8)                      | 273 (24.1)         |                    |
|                          |                                          | <b>NeOProM</b> | <b>No</b>                      | <b>1790 (72.2)</b>              | <b>1809 (72.8)</b> | <b>3599 (72.5)</b> |
|                          |                                          |                | <b>Yes</b>                     | <b>689 (27.8)</b>               | <b>675 (27.2)</b>  | <b>1364 (27.5)</b> |
|                          | <b>Time of Intervention Commencement</b> | SUPPORT        | <6 hours                       | 638 (99.2)                      | 645 (99.2)         | 1283 (99.2)        |
|                          |                                          |                | ≥6 hours                       | 5 (0.8)                         | 5 (0.8)            | 10 (0.8)           |
| COT                      |                                          | <6 hours       | 27 (4.5)                       | 26 (4.3)                        | 53 (4.4)           |                    |
|                          |                                          | ≥6 hours       | 575 (95.5)                     | 573 (95.7)                      | 1148 (95.6)        |                    |
| BOOST-NZ                 |                                          | <6 hours       | 28 (16.5)                      | 28 (16.6)                       | 56 (16.5)          |                    |
|                          |                                          | ≥6 hours       | 142 (83.5)                     | 141 (83.4)                      | 283 (83.5)         |                    |
| BOOST-II UK <sup>b</sup> |                                          | <6 hours       | .                              | .                               | .                  |                    |
|                          |                                          | ≥6 hours       | .                              | .                               | .                  |                    |
| BOOST-II AUS             |                                          | <6 hours       | 59 (10.4)                      | 60 (10.6)                       | 119 (10.5)         |                    |
|                          |                                          | ≥6 hours       | 506 (89.6)                     | 506 (89.4)                      | 1012 (89.5)        |                    |
|                          |                                          | <b>NeOProM</b> | <b>&lt;6 hours</b>             | <b>752 (38.0)</b>               | <b>759 (38.3)</b>  | <b>1511 (38.1)</b> |
|                          |                                          |                | <b>≥6 hours</b>                | <b>1228 (62.0)</b>              | <b>1225 (61.7)</b> | <b>2453 (61.9)</b> |



eTable 3. Subgroup numbers by trial (continued)

|                                                         |                |                 | Lower oxygen<br>saturation target | Higher oxygen<br>saturation target | Total              |
|---------------------------------------------------------|----------------|-----------------|-----------------------------------|------------------------------------|--------------------|
|                                                         |                |                 | N(%)                              | N(%)                               | N(%)               |
| <b>Oximeter Software</b>                                | SUPPORT        | Original        | 654 (100.0)                       | 662 (100.0)                        | 1316 (100.0)       |
|                                                         |                | Revised         | 0 (0.0)                           | 0 (0.0)                            | 0 (0.0)            |
|                                                         |                | Mixed           | 0 (0.0)                           | 0 (0.0)                            | 0 (0.0)            |
|                                                         | COT            | Original        | 286 (47.5)                        | 278 (46.4)                         | 564 (47.0)         |
|                                                         |                | Revised         | 284 (47.2)                        | 279 (46.6)                         | 563 (46.9)         |
|                                                         |                | Mixed           | 32 (5.3)                          | 42 (7.0)                           | 74 (6.2)           |
|                                                         | BOOST-NZ       | Original        | 170 (100.0)                       | 170 (100.0)                        | 340 (100.0)        |
|                                                         |                | Revised         | 0 (0.0)                           | 0 (0.0)                            | 0 (0.0)            |
|                                                         |                | Mixed           | 0 (0.0)                           | 0 (0.0)                            | 0 (0.0)            |
|                                                         | BOOST-II UK    | Original        | 113 (23.3)                        | 115 (23.6)                         | 228 (23.4)         |
|                                                         |                | Revised         | 373 (76.7)                        | 372 (76.4)                         | 745 (76.6)         |
|                                                         |                | Mixed           | 0 (0.0)                           | 0 (0.0)                            | 0 (0.0)            |
|                                                         | BOOST-II AUS   | Original        | 346 (60.9)                        | 346 (61.0)                         | 692 (61.0)         |
|                                                         |                | Revised         | 222 (39.1)                        | 221 (39.0)                         | 443 (39.0)         |
|                                                         |                | Mixed           | 0 (0.0)                           | 0 (0.0)                            | 0 (0.0)            |
|                                                         | <b>NeOProM</b> | <b>Original</b> | <b>1569 (63.3)</b>                | <b>1571 (63.2)</b>                 | <b>3140 (63.2)</b> |
|                                                         |                | <b>Revised</b>  | <b>879 (35.4)</b>                 | <b>872 (35.1)</b>                  | <b>1751 (35.3)</b> |
|                                                         |                | <b>Mixed</b>    | <b>32 (1.3)</b>                   | <b>42 (1.7)</b>                    | <b>74 (1.5)</b>    |
| <b>Small for gestational age<br/>(trialist defined)</b> | SUPPORT        | No              | 613 (93.7)                        | 607 (91.7)                         | 1220 (92.7)        |
|                                                         |                | Yes             | 41 (6.3)                          | 55 (8.3)                           | 96 (7.3)           |
|                                                         | COT            | No              | 548 (91.0)                        | 548 (91.5)                         | 1096 (91.3)        |
|                                                         |                | Yes             | 54 (9.0)                          | 51 (8.5)                           | 105 (8.7)          |
|                                                         | BOOST-NZ       | No              | 153 (90.0)                        | 157 (92.4)                         | 310 (91.2)         |
|                                                         |                | Yes             | 17 (10.0)                         | 13 (7.6)                           | 30 (8.8)           |
|                                                         | BOOST-II UK    | No              | 408 (84.5)                        | 411 (85.1)                         | 819 (84.8)         |
|                                                         |                | Yes             | 75 (15.5)                         | 72 (14.9)                          | 147 (15.2)         |
|                                                         | BOOST-II AUS   | No              | 487 (85.9)                        | 489 (86.2)                         | 976 (86.1)         |
|                                                         |                | Yes             | 80 (14.1)                         | 78 (13.8)                          | 158 (13.9)         |
|                                                         | <b>NeOProM</b> | <b>No</b>       | <b>2209 (89.2)</b>                | <b>2212 (89.2)</b>                 | <b>4421 (89.2)</b> |
|                                                         |                | <b>Yes</b>      | <b>267 (10.8)</b>                 | <b>269 (10.8)</b>                  | <b>536 (10.8)</b>  |

eTable 3. Subgroup numbers by trial (continued)

|                                                        |                |            | Lower oxygen<br>saturation target | Higher oxygen<br>saturation target | Total              |
|--------------------------------------------------------|----------------|------------|-----------------------------------|------------------------------------|--------------------|
|                                                        |                |            | N(%)                              | N(%)                               | N(%)               |
| <b>Small for gestational age<br/>(NeOProm defined)</b> | SUPPORT        | No         | 560 (85.6)                        | 546 (82.5)                         | 1106 (84.0)        |
|                                                        |                | Yes        | 94 (14.4)                         | 116 (17.5)                         | 210 (16.0)         |
|                                                        | COT            | No         | 548 (91.0)                        | 548 (91.5)                         | 1096 (91.3)        |
|                                                        |                | Yes        | 54 (9.0)                          | 51 (8.5)                           | 105 (8.7)          |
|                                                        | BOOST-NZ       | No         | 153 (90.0)                        | 157 (92.4)                         | 310 (91.2)         |
|                                                        |                | Yes        | 17 (10.0)                         | 13 (7.6)                           | 30 (8.8)           |
|                                                        | BOOST-II UK    | No         | 428 (88.2)                        | 430 (88.5)                         | 858 (88.4)         |
|                                                        |                | Yes        | 57 (11.8)                         | 56 (11.5)                          | 113 (11.6)         |
|                                                        | BOOST-II AUS   | No         | 487 (85.9)                        | 489 (86.2)                         | 976 (86.1)         |
|                                                        |                | Yes        | 80 (14.1)                         | 78 (13.8)                          | 158 (13.9)         |
|                                                        | <b>NeOProm</b> | <b>No</b>  | <b>2176 (87.8)</b>                | <b>2170 (87.4)</b>                 | <b>4346 (87.6)</b> |
|                                                        |                | <b>Yes</b> | <b>302 (12.2)</b>                 | <b>314 (12.6)</b>                  | <b>616 (12.4)</b>  |

#### Abbreviations

SUPPORT: Surfactant Positive Airway Pressure and Pulse Oximetry Trial; COT: Canadian Oxygen Trial; BOOST: Benefits of Oxygen Saturation Targeting; NZ: New Zealand; UK: United Kingdom; AUS: Australia; NeOProm: Neonatal Oxygenation Prospective Meta-analysis.

<sup>a</sup> Inborn - born inside the treating center; Outborn - born outside the treating center (e.g. transferred from another hospital)

<sup>b</sup> Not available for BOOST-II UK

<sup>c</sup> Less than 10<sup>th</sup> percentile using charts from Kramer et al.<sup>1</sup>

\*Analysis adjusted for trial and multiple births

Subgroup analyses with statistically significant results at the p<0.05 level are highlighted in yellow in the remainder of this document.

eTable 4. Death or major disability (primary analysis)^, by subgroups

| Subgroup   | Trial          | Lower Oxygen Saturation Target |             | Higher Oxygen Saturation Target |             | Adjusted* Relative Risk (95% CI) |              |                     |
|------------|----------------|--------------------------------|-------------|---------------------------------|-------------|----------------------------------|--------------|---------------------|
|            |                | n (%)                          | N           | n (%)                           | N           | Adjusted RR                      | p-value      | interaction p-value |
| GA<26 wks  | SUPPORT        | 178 (68.2)                     | 261         | 197 (71.1)                      | 277         | 0.96 (0.85, 1.08)                | 0.486        | 0.626               |
|            | COT            | 154 (60.6)                     | 254         | 148 (59.9)                      | 247         | 1.00 (0.88, 1.14)                | 1.000        |                     |
|            | BOOST NZ       | 35 (56.5)                      | 62          | 32 (53.3)                       | 60          | 1.10 (0.81, 1.50)                | 0.537        |                     |
|            | BOOST II UK    | 129 (72.5)                     | 178         | 116 (68.6)                      | 169         | 1.06 (0.92, 1.22)                | 0.415        |                     |
|            | BOOST II AUS   | 127 (57.5)                     | 221         | 117 (52.2)                      | 224         | 1.07 (0.90, 1.26)                | 0.441        |                     |
|            | <b>NeOProM</b> | <b>623 (63.8)</b>              | <b>976</b>  | <b>610 (62.4)</b>               | <b>977</b>  | <b>1.02 (0.96, 1.09)</b>         | <b>0.509</b> |                     |
| GA>=26 wks | SUPPORT        | 185 (52.6)                     | 352         | 177 (51.0)                      | 347         | 1.04 (0.90, 1.20)                | 0.632        |                     |
|            | COT            | 144 (44.6)                     | 323         | 134 (41.7)                      | 321         | 1.03 (0.88, 1.22)                | 0.708        |                     |
|            | BOOST NZ       | 27 (33.3)                      | 81          | 39 (46.4)                       | 84          | 0.70 (0.48, 1.03)                | 0.069        |                     |
|            | BOOST II UK    | 102 (48.6)                     | 210         | 95 (44.0)                       | 216         | 1.11 (0.91, 1.35)                | 0.324        |                     |
|            | BOOST II AUS   | 110 (38.5)                     | 286         | 95 (33.5)                       | 284         | 1.15 (0.93, 1.42)                | 0.189        |                     |
|            | <b>NeOProM</b> | <b>568 (45.4)</b>              | <b>1252</b> | <b>540 (43.1)</b>               | <b>1252</b> | <b>1.05 (0.96, 1.14)</b>         | <b>0.285</b> |                     |
| Inborn     | SUPPORT        | 363 (59.2)                     | 613         | 374 (59.9)                      | 624         | 0.99 (0.90, 1.09)                | 0.873        | 0.718               |
|            | COT            | 277 (51.6)                     | 537         | 256 (49.6)                      | 516         | 1.01 (0.91, 1.13)                | 0.798        |                     |
|            | BOOST NZ       | 59 (43.7)                      | 135         | 67 (49.3)                       | 136         | 0.90 (0.70, 1.15)                | 0.395        |                     |
|            | BOOST II UK    | 205 (59.4)                     | 345         | 184 (54.4)                      | 338         | 1.11 (0.98, 1.26)                | 0.107        |                     |
|            | BOOST II AUS   | 220 (46.9)                     | 469         | 193 (40.8)                      | 473         | 1.12 (0.97, 1.28)                | 0.114        |                     |
|            | <b>NeOProM</b> | <b>1124 (53.5)</b>             | <b>2099</b> | <b>1074 (51.5)</b>              | <b>2087</b> | <b>1.04 (0.98, 1.10)</b>         | <b>0.194</b> |                     |
| Outborn    | SUPPORT        | .                              | .           | .                               | .           | .                                | .            |                     |
|            | COT            | 21 (52.5)                      | 40          | 26 (50.0)                       | 52          | 1.03 (0.71, 1.49)                | 0.863        |                     |
|            | BOOST NZ       | 3 (37.5)                       | 8           | 4 (50.0)                        | 8           | 0.75 (0.24, 2.33)                | 0.618        |                     |
|            | BOOST II UK    | 26 (60.5)                      | 43          | 27 (57.4)                       | 47          | 1.05 (0.73, 1.51)                | 0.787        |                     |
|            | BOOST II AUS   | 17 (44.7)                      | 38          | 19 (54.3)                       | 35          | 0.80 (0.50, 1.28)                | 0.348        |                     |
|            | <b>NeOProM</b> | <b>67 (51.9)</b>               | <b>129</b>  | <b>76 (53.5)</b>                | <b>142</b>  | <b>0.99 (0.79, 1.24)</b>         | <b>0.912</b> |                     |
| Vaginal    | SUPPORT        | 111 (56.1)                     | 198         | 112 (54.1)                      | 207         | 1.04 (0.87, 1.24)                | 0.666        | 0.260               |
|            | COT            | 120 (56.1)                     | 214         | 108 (47.2)                      | 229         | 1.18 (0.99, 1.41)                | 0.062        |                     |
|            | BOOST NZ       | 29 (45.3)                      | 64          | 35 (51.5)                       | 68          | 0.88 (0.62, 1.25)                | 0.488        |                     |
|            | BOOST II UK    | 146 (61.1)                     | 239         | 138 (58.2)                      | 237         | 1.08 (0.93, 1.25)                | 0.306        |                     |
|            | BOOST II AUS   | 115 (47.7)                     | 241         | 102 (44.3)                      | 230         | 1.07 (0.88, 1.29)                | 0.496        |                     |
|            | <b>NeOProM</b> | <b>521 (54.5)</b>              | <b>956</b>  | <b>495 (51.0)</b>               | <b>971</b>  | <b>1.07 (0.99, 1.17)</b>         | <b>0.092</b> |                     |
| Caesarean  | SUPPORT        | 252 (60.7)                     | 415         | 262 (62.8)                      | 417         | 0.97 (0.87, 1.08)                | 0.583        |                     |
|            | COT            | 176 (48.8)                     | 361         | 173 (51.2)                      | 338         | 0.93 (0.82, 1.06)                | 0.269        |                     |
|            | BOOST NZ       | 33 (41.8)                      | 79          | 36 (47.4)                       | 76          | 0.90 (0.64, 1.27)                | 0.546        |                     |
|            | BOOST II UK    | 85 (57.0)                      | 149         | 73 (49.3)                       | 148         | 1.15 (0.94, 1.43)                | 0.180        |                     |
|            | BOOST II AUS   | 121 (45.7)                     | 265         | 108 (39.3)                      | 275         | 1.14 (0.95, 1.37)                | 0.169        |                     |
|            | <b>NeOProM</b> | <b>667 (52.6)</b>              | <b>1269</b> | <b>652 (52.0)</b>               | <b>1254</b> | <b>1.00 (0.93, 1.08)</b>         | <b>0.928</b> |                     |
| ANS - No   | SUPPORT        | 10 (50.0)                      | 20          | 16 (57.1)                       | 28          | 0.86 (0.49, 1.49)                | 0.585        | 0.348               |
|            | COT            | 47 (69.1)                      | 68          | 40 (71.4)                       | 56          | 0.97 (0.78, 1.20)                | 0.752        |                     |
|            | BOOST NZ       | 9 (52.9)                       | 17          | 9 (60.0)                        | 15          | 0.88 (0.48, 1.62)                | 0.658        |                     |
|            | BOOST II UK    | 22 (64.7)                      | 34          | 27 (71.1)                       | 38          | 0.96 (0.67, 1.37)                | 0.812        |                     |

eTable 4. Death or major disability (primary analysis)^, by subgroups (continued)

| Subgroup     | Trial          | Lower Oxygen Saturation Target |             | Higher Oxygen Saturation Target |             | Adjusted* Relative Risk (95% CI) |              |                     |
|--------------|----------------|--------------------------------|-------------|---------------------------------|-------------|----------------------------------|--------------|---------------------|
|              |                | n (%)                          | N           | n (%)                           | N           | Adjusted RR                      | p-value      | interaction p-value |
| ANS - Yes    | BOOST II AUS   | 25 (48.1)                      | 52          | 19 (50.0)                       | 38          | 1.07 (0.70, 1.64)                | 0.766        |                     |
|              | <b>NeOProM</b> | <b>113 (59.2)</b>              | <b>191</b>  | <b>111 (63.4)</b>               | <b>175</b>  | <b>0.97 (0.83, 1.13)</b>         | <b>0.714</b> |                     |
|              | SUPPORT        | 353 (59.5)                     | 593         | 357 (60.0)                      | 595         | 1.00 (0.91, 1.10)                | 0.963        |                     |
|              | COT            | 249 (49.1)                     | 507         | 240 (47.1)                      | 510         | 1.02 (0.91, 1.15)                | 0.744        |                     |
|              | BOOST NZ       | 53 (42.1)                      | 126         | 62 (48.1)                       | 129         | 0.88 (0.67, 1.16)                | 0.368        |                     |
|              | BOOST II UK    | 208 (59.1)                     | 352         | 183 (53.0)                      | 345         | 1.12 (0.99, 1.28)                | 0.079        |                     |
|              | BOOST II AUS   | 210 (46.4)                     | 453         | 192 (41.3)                      | 465         | 1.09 (0.95, 1.26)                | 0.212        |                     |
|              | <b>NeOProM</b> | <b>1073 (52.8)</b>             | <b>2031</b> | <b>1034 (50.6)</b>              | <b>2044</b> | <b>1.04 (0.98, 1.10)</b>         | <b>0.176</b> |                     |
| Male         | SUPPORT        | 210 (65.8)                     | 319         | 232 (66.1)                      | 351         | 1.00 (0.89, 1.11)                | 0.950        | 0.543               |
|              | COT            | 189 (59.1)                     | 320         | 176 (57.3)                      | 307         | 1.00 (0.88, 1.13)                | 1.000        |                     |
|              | BOOST NZ       | 43 (55.1)                      | 78          | 43 (58.9)                       | 73          | 0.94 (0.71, 1.24)                | 0.664        |                     |
|              | BOOST II UK    | 133 (64.9)                     | 205         | 119 (58.9)                      | 202         | 1.10 (0.95, 1.28)                | 0.213        |                     |
|              | BOOST II AUS   | 154 (57.9)                     | 266         | 127 (48.3)                      | 263         | 1.19 (1.02, 1.39)                | 0.030        |                     |
|              | <b>NeOProM</b> | <b>729 (61.4)</b>              | <b>1188</b> | <b>697 (58.3)</b>               | <b>1196</b> | <b>1.05 (0.98, 1.12)</b>         | <b>0.150</b> |                     |
| Female       | SUPPORT        | 153 (52.0)                     | 294         | 142 (52.0)                      | 273         | 1.00 (0.85, 1.18)                | 0.991        |                     |
|              | COT            | 109 (42.4)                     | 257         | 106 (40.6)                      | 261         | 1.03 (0.85, 1.26)                | 0.751        |                     |
|              | BOOST NZ       | 19 (29.2)                      | 65          | 28 (39.4)                       | 71          | 1.47 (0.65, 3.30)                | 0.352        |                     |
|              | BOOST II UK    | 98 (53.6)                      | 183         | 92 (50.3)                       | 183         | 1.08 (0.89, 1.30)                | 0.441        |                     |
|              | BOOST II AUS   | 83 (34.4)                      | 241         | 85 (34.7)                       | 245         | 1.00 (0.79, 1.26)                | 0.975        |                     |
|              | <b>NeOProM</b> | <b>462 (44.4)</b>              | <b>1040</b> | <b>453 (43.9)</b>               | <b>1033</b> | <b>1.02 (0.93, 1.12)</b>         | <b>0.724</b> |                     |
| Singleton    | SUPPORT        | 275 (59.9)                     | 459         | 262 (57.5)                      | 456         | 1.04 (0.94, 1.16)                | 0.451        | 0.075               |
|              | COT            | 197 (51.6)                     | 382         | 188 (48.1)                      | 391         | 1.07 (0.93, 1.24)                | 0.332        |                     |
|              | BOOST NZ       | 43 (41.3)                      | 104         | 49 (45.8)                       | 107         | 0.90 (0.66, 1.23)                | 0.516        |                     |
|              | BOOST II UK    | 160 (59.3)                     | 270         | 147 (54.0)                      | 272         | 1.10 (0.95, 1.27)                | 0.221        |                     |
|              | BOOST II AUS   | 182 (47.4)                     | 384         | 161 (41.5)                      | 388         | 1.14 (0.97, 1.34)                | 0.100        |                     |
|              | <b>NeOProM</b> | <b>857 (53.6)</b>              | <b>1599</b> | <b>807 (50.0)</b>               | <b>1614</b> | <b>1.07 (1.00, 1.14)</b>         | <b>0.045</b> |                     |
| Multiple     | SUPPORT        | 88 (57.1)                      | 154         | 112 (66.7)                      | 168         | 0.84 (0.69, 1.02)                | 0.083        |                     |
|              | COT            | 101 (51.8)                     | 195         | 94 (53.1)                       | 177         | 0.94 (0.81, 1.09)                | 0.422        |                     |
|              | BOOST NZ       | 19 (48.7)                      | 39          | 22 (59.5)                       | 37          | 0.87 (0.60, 1.26)                | 0.449        |                     |
|              | BOOST II UK    | 71 (60.2)                      | 118         | 64 (56.6)                       | 113         | 1.10 (0.90, 1.35)                | 0.363        |                     |
|              | BOOST II AUS   | 55 (44.7)                      | 123         | 51 (42.5)                       | 120         | 1.02 (0.80, 1.31)                | 0.869        |                     |
|              | <b>NeOProM</b> | <b>334 (53.1)</b>              | <b>629</b>  | <b>343 (55.8)</b>               | <b>615</b>  | <b>0.96 (0.88, 1.06)</b>         | <b>0.418</b> |                     |
| start<6 hrs  | SUPPORT        | 353 (59.1)                     | 597         | 363 (59.8)                      | 607         | 0.99 (0.90, 1.09)                | 0.902        | 0.483               |
|              | COT            | 9 (36.0)                       | 25          | 14 (56.0)                       | 25          | 0.31 (0.03, 3.73)                | 0.359        |                     |
|              | BOOST NZ       | 16 (64.0)                      | 25          | 11 (45.8)                       | 24          | 1.39 (0.82, 2.36)                | 0.224        |                     |
|              | BOOST II UK    |                                |             |                                 |             |                                  |              |                     |
|              | BOOST II AUS   | 26 (50.0)                      | 52          | 23 (41.8)                       | 55          | 1.13 (0.74, 1.71)                | 0.571        |                     |
|              | <b>NeOProM</b> | <b>404 (57.8)</b>              | <b>699</b>  | <b>411 (57.8)</b>               | <b>711</b>  | <b>1.00 (0.91, 1.10)</b>         | <b>0.991</b> |                     |
| start>=6 hrs | SUPPORT        | 2 (40.0)                       | 5           | 1 (20.0)                        | 5           | 0.96 (0.31, 3.01)                | 0.947        |                     |
|              | COT            | 289 (52.4)                     | 552         | 268 (49.4)                      | 543         | 1.04 (0.93, 1.16)                | 0.490        |                     |
|              | BOOST NZ       | 46 (39.0)                      | 118         | 59 (49.6)                       | 119         | 0.79 (0.60, 1.05)                | 0.110        |                     |

**eTable 4. Death or major disability (primary analysis)^, by subgroups (continued)**

| Subgroup                   | Trial          | Lower Oxygen Saturation Target |             | Higher Oxygen Saturation Target |             | Adjusted* Relative Risk (95% CI) |              |                     |
|----------------------------|----------------|--------------------------------|-------------|---------------------------------|-------------|----------------------------------|--------------|---------------------|
|                            |                | n (%)                          | N           | n (%)                           | N           | Adjusted RR                      | p-value      | interaction p-value |
|                            | BOOST II UK    |                                | .           |                                 | .           |                                  | .            |                     |
|                            | BOOST II AUS   | 211 (46.5)                     | 454         | 188 (41.6)                      | 452         | 1.11 (0.97, 1.28)                | 0.135        |                     |
|                            | <b>NeOProM</b> | <b>548 (48.5)</b>              | <b>1129</b> | <b>516 (46.1)</b>               | <b>1119</b> | <b>1.04 (0.96, 1.13)</b>         | <b>0.340</b> |                     |
| Original software          | SUPPORT        | 363 (59.2)                     | 613         | 374 (59.9)                      | 624         | 0.99 (0.90, 1.09)                | 0.873        | 0.087               |
|                            | COT            | 140 (50.9)                     | 275         | 138 (52.3)                      | 264         | 0.96 (0.82, 1.11)                | 0.573        |                     |
|                            | BOOST NZ       | 62 (43.4)                      | 143         | 71 (49.3)                       | 144         | 0.89 (0.70, 1.14)                | 0.346        |                     |
|                            | BOOST II UK    | 54 (65.9)                      | 82          | 53 (57.6)                       | 92          | 1.17 (0.92, 1.49)                | 0.191        |                     |
|                            | BOOST II AUS   | 138 (44.5)                     | 310         | 132 (41.4)                      | 319         | 1.05 (0.89, 1.25)                | 0.560        |                     |
|                            | <b>NeOProM</b> | <b>757 (53.2)</b>              | <b>1423</b> | <b>768 (53.2)</b>               | <b>1443</b> | <b>1.00 (0.94, 1.07)</b>         | <b>0.949</b> |                     |
| Revised software           | SUPPORT        |                                | .           |                                 | .           |                                  | .            |                     |
|                            | COT            | 143 (52.8)                     | 271         | 123 (46.4)                      | 265         | 1.09 (0.93, 1.28)                | 0.297        |                     |
|                            | BOOST NZ       |                                | .           |                                 | .           |                                  | .            |                     |
|                            | BOOST II UK    | 177 (57.8)                     | 306         | 158 (53.9)                      | 293         | 1.08 (0.94, 1.24)                | 0.273        |                     |
|                            | BOOST II AUS   | 99 (50.3)                      | 197         | 80 (42.3)                       | 189         | 1.18 (0.96, 1.46)                | 0.116        |                     |
|                            | <b>NeOProM</b> | <b>419 (54.1)</b>              | <b>774</b>  | <b>361 (48.3)</b>               | <b>747</b>  | <b>1.11 (1.01, 1.22)</b>         | <b>0.033</b> |                     |
| SGA: Trialist defined - No | SUPPORT        | 330 (57.6)                     | 573         | 333 (58.4)                      | 570         | 0.99 (0.89, 1.09)                | 0.803        | 0.562               |
|                            | COT            | 265 (50.6)                     | 524         | 250 (48.2)                      | 519         | 1.02 (0.91, 1.15)                | 0.696        |                     |
|                            | BOOST II NZ    | 53 (41.7)                      | 127         | 64 (48.5)                       | 132         | 0.87 (0.67, 1.13)                | 0.295        |                     |
|                            | BOOST II UK    | 194 (59.3)                     | 327         | 175 (53.7)                      | 326         | 1.13 (0.99, 1.29)                | 0.063        |                     |
|                            | BOOST II AUS   | 189 (43.9)                     | 431         | 177 (40.7)                      | 435         | 1.07 (0.92, 1.25)                | 0.358        |                     |
|                            | <b>NeOProM</b> | <b>1031(52.0)</b>              | <b>1982</b> | <b>999 (50.4)</b>               | <b>1982</b> | <b>1.03 (0.97, 1.09)</b>         | <b>0.308</b> |                     |
| Yes                        | SUPPORT        | 33 (82.5)                      | 40          | 41 (75.9)                       | 54          | 1.09 (0.88, 1.34)                | 0.420        |                     |
|                            | COT            | 33 (62.3)                      | 53          | 32 (65.3)                       | 49          | 0.96 (0.71, 1.28)                | 0.773        |                     |
|                            | BOOST II NZ    | 9 (56.3)                       | 16          | 7 (58.3)                        | 12          | 0.88 (0.47, 1.65)                | 0.697        |                     |
|                            | BOOST II UK    | 36 (61.0)                      | 59          | 33 (58.9)                       | 56          | 3.05 (0.48, 19.3)                | 0.236        |                     |
|                            | BOOST II AUS   | 48 (63.2)                      | 76          | 35 (47.9)                       | 73          | 1.30 (0.98, 1.73)                | 0.065        |                     |
|                            | <b>NeOProM</b> | <b>159 (65.2)</b>              | <b>244</b>  | <b>148 (60.7)</b>               | <b>244</b>  | <b>1.08 (0.95, 1.23)</b>         | <b>0.222</b> |                     |
| SGA: NeOProM defined - No  | SUPPORT        | 299 (57.2)                     | 523         | 291 (56.9)                      | 511         | 1.01 (0.90, 1.12)                | 0.910        | 0.870               |
|                            | COT            | 265 (50.6)                     | 524         | 250 (48.2)                      | 519         | 1.02 (0.91, 1.15)                | 0.696        |                     |
|                            | BOOST II NZ    | 53 (41.7)                      | 127         | 64 (48.5)                       | 132         | 0.87 (0.67, 1.13)                | 0.295        |                     |
|                            | BOOST II UK    | 204 (59.3)                     | 344         | 184 (53.8)                      | 342         | 1.11 (0.98, 1.26)                | 0.103        |                     |
|                            | BOOST II AUS   | 189 (43.9)                     | 431         | 177 (40.7)                      | 435         | 1.07 (0.92, 1.25)                | 0.358        |                     |
|                            | <b>NeOProM</b> | <b>1010 (51.8)</b>             | <b>1949</b> | <b>966 (49.8)</b>               | <b>1939</b> | <b>1.04 (0.98, 1.10)</b>         | <b>0.230</b> |                     |
| Yes                        | SUPPORT        | 64 (71.1)                      | 90          | 83 (73.5)                       | 113         | 0.97 (0.81, 1.16)                | 0.737        |                     |
|                            | COT            | 33 (62.3)                      | 53          | 32 (65.3)                       | 49          | 0.96 (0.71, 1.28)                | 0.773        |                     |
|                            | BOOST II NZ    | 9 (56.3)                       | 16          | 7 (58.3)                        | 12          | 0.88 (0.47, 1.65)                | 0.697        |                     |
|                            | BOOST II UK    | 27 (61.4)                      | 44          | 27 (62.8)                       | 43          | 0.98 (0.71, 1.36)                | 0.914        |                     |
|                            | BOOST II AUS   | 48 (63.2)                      | 76          | 35 (47.9)                       | 73          | 1.30 (0.98, 1.73)                | 0.065        |                     |
|                            | <b>NeOProM</b> | <b>181 (64.9)</b>              | <b>279</b>  | <b>184 (63.4)</b>               | <b>290</b>  | <b>1.01 (0.90, 1.15)</b>         | <b>0.835</b> |                     |

**^ Primary outcome as pre-specified in published NeOProM protocol:** composite outcome of death or major disability by 18-24 months' age, corrected for prematurity. Major disability is any of the following: Bayley-III Developmental Assessment cognitive score <85 and/or language score <85; severe visual loss; cerebral palsy with Gross Motor Function Classification System (GMFCS) level 2 or higher at 18-24 months' age, corrected for prematurity; or deafness requiring hearing aids.

\*Analysis adjusted for trial and multiple births

#### **Abbreviations/definitions**

CI: confidence interval; RR: relative risk; GA: gestational age; SUPPORT: Surfactant Positive Airway Pressure and Pulse Oximetry Trial; COT: Canadian Oxygen Trial; BOOST: Benefits of Oxygen Saturation Targeting; NZ: New Zealand; UK: United Kingdom; AUS: Australia; NeOProM: Neonatal Oxygenation Prospective Meta-analysis; inborn: born inside the treating center; outborn: born outside the treating center (e.g. transferred from another hospital); vaginal: mode of delivery through the vagina; Caesarean: mode of delivery via surgical procedure; ANS: antenatal corticosteroids; singleton: child born as a single birth; multiple: more than one child per birth; start<6 hrs: intervention commenced less than 6 hours after birth; start>=6 hrs: intervention commenced greater than or equal to 6 hours after birth; original software: original oximeter software; revised software: revised oximeter software; SGA: small for gestational age; SGA NeOProM defined: small for gestational age as per definition used by NeOProM collaboration, i.e. less than 10th percentile using charts from Kramer et al.<sup>1</sup>

The subgroup analysis by oximeter software type (original vs revised) excludes n=74 infants in COT who were exposed to both the original and revised software.

Empty cells (.) indicate data not collected or not applicable in this trial.

eTable 5. Death or major disability (supportive analysis)<sup>#</sup>, by subgroups

| Subgroup  | Trial          | Lower Oxygen Saturation Target |             | Higher Oxygen Saturation Target |             | Adjusted* Relative Risk (95% CI) |              |                     |
|-----------|----------------|--------------------------------|-------------|---------------------------------|-------------|----------------------------------|--------------|---------------------|
|           |                | n (%)                          | N           | n (%)                           | N           | Adjusted RR                      | p-value      | interaction p-value |
| GA<26 wks | SUPPORT        | 178 (68.2)                     | 261         | 197 (71.1)                      | 277         | 0.96 (0.85, 1.08)                | 0.486        | 0.808               |
|           | COT            | 154 (60.6)                     | 254         | 148 (59.9)                      | 247         | 1.00 (0.88, 1.14)                | 1.000        |                     |
|           | BOOST NZ       | 38 (52.8)                      | 72          | 33 (45.8)                       | 72          | 1.19 (0.87, 1.62)                | 0.285        |                     |
|           | BOOST II UK    | 136 (65.4)                     | 208         | 122 (58.1)                      | 210         | 1.14 (0.98, 1.32)                | 0.100        |                     |
|           | BOOST II AUS   | 130 (55.8)                     | 233         | 120 (51.7)                      | 232         | 1.06 (0.90, 1.25)                | 0.518        |                     |
|           | <b>NeOProM</b> | <b>636 (61.9)</b>              | <b>1028</b> | <b>620 (59.7)</b>               | <b>1038</b> | <b>1.03 (0.97, 1.10)</b>         | <b>0.354</b> |                     |
| GA≥26 wks | SUPPORT        | 186 (52.7)                     | 353         | 177 (51.0)                      | 347         | 1.04 (0.90, 1.20)                | 0.608        |                     |
|           | COT            | 144 (44.4)                     | 324         | 135 (41.9)                      | 322         | 1.03 (0.87, 1.21)                | 0.765        |                     |
|           | BOOST NZ       | 27 (28.4)                      | 95          | 41 (42.7)                       | 96          | 0.65 (0.44, 0.95)                | 0.026        |                     |
|           | BOOST II UK    | 109 (41.1)                     | 265         | 98 (38.0)                       | 258         | 1.08 (0.88, 1.34)                | 0.461        |                     |
|           | BOOST II AUS   | 116 (37.2)                     | 312         | 97 (31.5)                       | 308         | 1.18 (0.96, 1.45)                | 0.118        |                     |
|           | <b>NeOProM</b> | <b>582 (43.1)</b>              | <b>1349</b> | <b>548 (41.2)</b>               | <b>1331</b> | <b>1.04 (0.96, 1.14)</b>         | <b>0.339</b> |                     |
| Inborn    | SUPPORT        | 364 (59.3)                     | 614         | 374 (59.9)                      | 624         | 0.99 (0.90, 1.09)                | 0.893        | 0.901               |
|           | COT            | 277 (51.5)                     | 538         | 256 (49.6)                      | 516         | 1.01 (0.91, 1.13)                | 0.821        |                     |
|           | BOOST NZ       | 62 (39.5)                      | 157         | 70 (44.9)                       | 156         | 0.89 (0.69, 1.14)                | 0.348        |                     |
|           | BOOST II UK    | 217 (51.9)                     | 418         | 193 (47.0)                      | 411         | 1.12 (0.98, 1.28)                | 0.096        |                     |
|           | BOOST II AUS   | 227 (45.1)                     | 503         | 198 (39.6)                      | 500         | 1.11 (0.97, 1.28)                | 0.124        |                     |
|           | <b>NeOProM</b> | <b>1147 (51.4)</b>             | <b>2230</b> | <b>1091 (49.4)</b>              | <b>2207</b> | <b>1.04 (0.98, 1.10)</b>         | <b>0.210</b> |                     |
| Outborn   | SUPPORT        |                                | .           |                                 | .           |                                  | .            |                     |
|           | COT            | 21 (52.5)                      | 40          | 27 (50.9)                       | 53          | 1.02 (0.71, 1.47)                | 0.915        |                     |
|           | BOOST NZ       | 3 (30.0)                       | 10          | 4 (33.3)                        | 12          | 0.85 (0.25, 2.93)                | 0.797        |                     |
|           | BOOST II UK    | 28 (50.9)                      | 55          | 27 (47.4)                       | 57          | 1.08 (0.72, 1.60)                | 0.719        |                     |
|           | BOOST II AUS   | 19 (45.2)                      | 42          | 19 (47.5)                       | 40          | 0.96 (0.62, 1.51)                | 0.875        |                     |
|           | <b>NeOProM</b> | <b>71 (48.3)</b>               | <b>147</b>  | <b>77 (47.5)</b>                | <b>162</b>  | <b>1.02 (0.81, 1.29)</b>         | <b>0.849</b> |                     |
| Vaginal   | SUPPORT        | 111 (56.1)                     | 198         | 112 (54.1)                      | 207         | 1.04 (0.87, 1.24)                | 0.666        | 0.145               |
|           | COT            | 120 (56.1)                     | 214         | 109 (47.4)                      | 230         | 1.18 (0.99, 1.41)                | 0.069        |                     |
|           | BOOST NZ       | 31 (41.3)                      | 75          | 36 (45.6)                       | 79          | 0.90 (0.63, 1.29)                | 0.569        |                     |
|           | BOOST II UK    | 152 (54.1)                     | 281         | 143 (49.5)                      | 289         | 1.11 (0.95, 1.29)                | 0.210        |                     |
|           | BOOST II AUS   | 121 (46.4)                     | 261         | 105 (43.0)                      | 244         | 1.08 (0.89, 1.30)                | 0.439        |                     |
|           | <b>NeOProM</b> | <b>535 (52.0)</b>              | <b>1029</b> | <b>505 (48.1)</b>               | <b>1049</b> | <b>1.09 (1.00, 1.18)</b>         | <b>0.055</b> |                     |
| Caesarean | SUPPORT        | 253 (60.8)                     | 416         | 262 (62.8)                      | 417         | 0.97 (0.87, 1.08)                | 0.605        |                     |
|           | COT            | 176 (48.6)                     | 362         | 173 (51.2)                      | 338         | 0.93 (0.81, 1.06)                | 0.254        |                     |
|           | BOOST NZ       | 34 (37.0)                      | 92          | 38 (42.7)                       | 89          | 0.88 (0.63, 1.24)                | 0.481        |                     |
|           | BOOST II UK    | 93 (48.4)                      | 192         | 77 (43.0)                       | 179         | 1.12 (0.90, 1.39)                | 0.308        |                     |
|           | BOOST II AUS   | 123 (43.6)                     | 282         | 110 (37.7)                      | 292         | 1.13 (0.94, 1.36)                | 0.180        |                     |
|           | <b>NeOProM</b> | <b>679 (50.5)</b>              | <b>1344</b> | <b>660 (50.2)</b>               | <b>1315</b> | <b>1.00 (0.93, 1.07)</b>         | <b>0.906</b> |                     |
| ANS - No  | SUPPORT        | 10 (50.0)                      | 20          | 16 (57.1)                       | 28          | 0.86 (0.49, 1.49)                | 0.585        | 0.336               |
|           | COT            | 47 (69.1)                      | 68          | 41 (71.9)                       | 57          | 0.96 (0.77, 1.19)                | 0.706        |                     |
|           | BOOST NZ       | 9 (45.0)                       | 20          | 9 (52.9)                        | 17          | 0.85 (0.44, 1.64)                | 0.643        |                     |
|           | BOOST II UK    | 22 (57.9)                      | 38          | 28 (62.2)                       | 45          | 0.95 (0.67, 1.35)                | 0.770        |                     |

eTable 5. Death or major disability (supportive analysis)<sup>#</sup>, by subgroups (continued)

| Subgroup    | Trial          | Lower Oxygen Saturation Target |             | Higher Oxygen Saturation Target |             | Adjusted* Relative Risk (95% CI) |              |                     |
|-------------|----------------|--------------------------------|-------------|---------------------------------|-------------|----------------------------------|--------------|---------------------|
|             |                | n (%)                          | N           | n (%)                           | N           | Adjusted RR                      | p-value      | interaction p-value |
| ANS - Yes   | BOOST II AUS   | 28 (47.5)                      | 59          | 20 (50.0)                       | 40          | 0.99 (0.67, 1.47)                | 0.964        |                     |
|             | <b>NeOProM</b> | <b>116 (56.6)</b>              | <b>205</b>  | <b>114 (61.0)</b>               | <b>187</b>  | <b>0.96 (0.82, 1.12)</b>         | <b>0.612</b> |                     |
|             | SUPPORT        | 354 (59.6)                     | 594         | 357 (60.0)                      | 595         | 1.00 (0.91, 1.10)                | 0.982        |                     |
|             | COT            | 249 (49.0)                     | 508         | 240 (47.1)                      | 510         | 1.02 (0.90, 1.15)                | 0.767        |                     |
|             | BOOST NZ       | 56 (38.1)                      | 147         | 65 (43.0)                       | 151         | 0.89 (0.68, 1.16)                | 0.385        |                     |
|             | BOOST II UK    | 222 (51.3)                     | 433         | 191 (45.4)                      | 421         | 1.14 (0.99, 1.30)                | 0.070        |                     |
|             | BOOST II AUS   | 215 (44.5)                     | 483         | 196 (39.7)                      | 494         | 1.10 (0.95, 1.26)                | 0.195        |                     |
|             | <b>NeOProM</b> | <b>1096 (50.6)</b>             | <b>2165</b> | <b>1049 (48.3)</b>              | <b>2171</b> | <b>1.04 (0.98, 1.10)</b>         | <b>0.175</b> |                     |
| Male        | SUPPORT        | 210 (65.8)                     | 319         | 232 (66.1)                      | 351         | 1.00 (0.89, 1.11)                | 0.950        | 0.476               |
|             | COT            | 189 (58.9)                     | 321         | 177 (57.5)                      | 308         | 1.00 (0.88, 1.13)                | 0.940        |                     |
|             | BOOST NZ       | 45 (51.1)                      | 88          | 45 (50.6)                       | 89          | 1.02 (0.76, 1.36)                | 0.894        |                     |
|             | BOOST II UK    | 142 (56.6)                     | 251         | 126 (50.0)                      | 252         | 1.13 (0.96, 1.33)                | 0.156        |                     |
|             | BOOST II AUS   | 159 (56.2)                     | 283         | 130 (46.4)                      | 280         | 1.20 (1.03, 1.41)                | 0.023        |                     |
|             | <b>NeOProM</b> | <b>745 (59.0)</b>              | <b>1262</b> | <b>710 (55.5)</b>               | <b>1280</b> | <b>1.06 (0.99, 1.13)</b>         | <b>0.106</b> |                     |
| Female      | SUPPORT        | 154 (52.2)                     | 295         | 142 (52.0)                      | 273         | 1.00 (0.85, 1.18)                | 0.959        |                     |
|             | COT            | 109 (42.4)                     | 257         | 106 (40.6)                      | 261         | 1.03 (0.85, 1.26)                | 0.751        |                     |
|             | BOOST NZ       | 20 (25.3)                      | 79          | 29 (36.7)                       | 79          | 1.45 (0.65, 3.24)                | 0.362        |                     |
|             | BOOST II UK    | 103 (46.4)                     | 222         | 94 (43.5)                       | 216         | 1.07 (0.87, 1.31)                | 0.524        |                     |
|             | BOOST II AUS   | 87 (33.2)                      | 262         | 87 (33.5)                       | 260         | 1.00 (0.79, 1.26)                | 0.981        |                     |
|             | <b>NeOProM</b> | <b>473 (42.4)</b>              | <b>1115</b> | <b>458 (42.1)</b>               | <b>1089</b> | <b>1.01 (0.92, 1.11)</b>         | <b>0.838</b> |                     |
| Singleton   | SUPPORT        | 275 (59.9)                     | 459         | 262 (57.5)                      | 456         | 1.04 (0.94, 1.16)                | 0.451        | 0.096               |
|             | COT            | 197 (51.4)                     | 383         | 189 (48.2)                      | 392         | 1.07 (0.93, 1.23)                | 0.370        |                     |
|             | BOOST NZ       | 45 (36.9)                      | 122         | 51 (41.5)                       | 123         | 0.89 (0.65, 1.22)                | 0.464        |                     |
|             | BOOST II UK    | 169 (50.3)                     | 336         | 153 (45.8)                      | 334         | 1.10 (0.94, 1.29)                | 0.246        |                     |
|             | BOOST II AUS   | 189 (45.8)                     | 413         | 165 (40.0)                      | 413         | 1.15 (0.98, 1.34)                | 0.092        |                     |
|             | <b>NeOProM</b> | <b>875 (51.1)</b>              | <b>1713</b> | <b>820 (47.7)</b>               | <b>1718</b> | <b>1.07 (1.00, 1.14)</b>         | <b>0.053</b> |                     |
| Multiple    | SUPPORT        | 89 (57.4)                      | 155         | 112 (66.7)                      | 168         | 0.85 (0.70, 1.03)                | 0.093        |                     |
|             | COT            | 101 (51.8)                     | 195         | 94 (53.1)                       | 177         | 0.94 (0.81, 1.09)                | 0.422        |                     |
|             | BOOST NZ       | 20 (44.4)                      | 45          | 23 (51.1)                       | 45          | 0.89 (0.62, 1.28)                | 0.536        |                     |
|             | BOOST II UK    | 76 (55.5)                      | 137         | 67 (50.0)                       | 134         | 1.13 (0.91, 1.39)                | 0.268        |                     |
|             | BOOST II AUS   | 57 (43.2)                      | 132         | 52 (40.9)                       | 127         | 1.03 (0.81, 1.32)                | 0.781        |                     |
|             | <b>NeOProM</b> | <b>343 (51.7)</b>              | <b>664</b>  | <b>348 (53.5)</b>               | <b>651</b>  | <b>0.97 (0.88, 1.06)</b>         | <b>0.504</b> |                     |
| start<6 hrs | SUPPORT        | 354 (59.2)                     | 598         | 363 (59.8)                      | 607         | 1.00 (0.90, 1.10)                | 0.922        | 0.376               |
|             | COT            | 9 (36.0)                       | 25          | 14 (56.0)                       | 25          | 0.31 (0.03, 3.73)                | 0.359        |                     |
|             | BOOST NZ       | 16 (57.1)                      | 28          | 12 (42.9)                       | 28          | 1.33 (0.77, 2.29)                | 0.307        |                     |
|             | BOOST II UK    |                                |             |                                 |             |                                  |              |                     |
|             | BOOST II AUS   | 26 (45.6)                      | 57          | 24 (42.1)                       | 57          | 1.01 (0.66, 1.54)                | 0.958        |                     |
|             | <b>NeOProM</b> | <b>405 (57.2)</b>              | <b>708</b>  | <b>413 (57.6)</b>               | <b>717</b>  | <b>0.99 (0.91, 1.09)</b>         | <b>0.894</b> |                     |
| >=6 hrs     | SUPPORT        | 2 (40.0)                       | 5           | 1 (20.0)                        | 5           | 0.96 (0.31, 3.01)                | 0.947        |                     |
|             | COT            | 289 (52.3)                     | 553         | 269 (49.4)                      | 544         | 1.03 (0.93, 1.15)                | 0.528        |                     |
|             | BOOST NZ       | 49 (35.3)                      | 139         | 61 (43.9)                       | 139         | 0.80 (0.61, 1.06)                | 0.127        |                     |



eTable 5. Death or major disability (supportive analysis)<sup>#</sup>, by subgroups (continued)

| Subgroup  | Trial          | Lower Oxygen Saturation Target |             | Higher Oxygen Saturation Target |             | Adjusted* Relative Risk (95% CI) |              |                     |
|-----------|----------------|--------------------------------|-------------|---------------------------------|-------------|----------------------------------|--------------|---------------------|
|           |                | n (%)                          | N           | n (%)                           | N           | Adjusted RR                      | p-value      | interaction p-value |
|           | BOOST II UK    |                                | .           |                                 | .           |                                  | .            |                     |
|           | BOOST II AUS   | 219 (45.2)                     | 485         | 192 (39.8)                      | 482         | 1.13 (0.98, 1.30)                | 0.082        |                     |
|           | <b>NeOProM</b> | <b>559 (47.3)</b>              | <b>1182</b> | <b>523 (44.7)</b>               | <b>1170</b> | <b>1.05 (0.96, 1.13)</b>         | <b>0.277</b> |                     |
| Original  | SUPPORT        | 364 (59.3)                     | 614         | 374 (59.9)                      | 624         | 0.99 (0.90, 1.09)                | 0.893        | 0.068               |
| software  | COT            | 140 (50.9)                     | 275         | 138 (52.3)                      | 264         | 0.96 (0.82, 1.11)                | 0.573        |                     |
|           | BOOST NZ       | 65 (38.9)                      | 167         | 74 (44.0)                       | 168         | 0.89 (0.69, 1.13)                | 0.340        |                     |
|           | BOOST II UK    | 60 (56.1)                      | 107         | 56 (50.5)                       | 111         | 1.12 (0.86, 1.45)                | 0.387        |                     |
|           | BOOST II AUS   | 144 (43.2)                     | 333         | 133 (39.7)                      | 335         | 1.07 (0.90, 1.27)                | 0.418        |                     |
|           | <b>NeOProM</b> | <b>773 (51.7)</b>              | <b>1496</b> | <b>775 (51.6)</b>               | <b>1502</b> | <b>1.00 (0.94, 1.07)</b>         | <b>0.985</b> |                     |
| Revised   | SUPPORT        |                                | .           |                                 | .           |                                  | .            |                     |
| software  | COT            | 143 (52.6)                     | 272         | 124 (46.6)                      | 266         | 1.08 (0.92, 1.27)                | 0.338        |                     |
|           | BOOST NZ       |                                | .           |                                 | .           |                                  | .            |                     |
|           | BOOST II UK    | 185 (50.5)                     | 366         | 164 (45.9)                      | 357         | 1.11 (0.96, 1.28)                | 0.175        |                     |
|           | BOOST II AUS   | 102 (48.1)                     | 212         | 84 (41.0)                       | 205         | 1.17 (0.95, 1.44)                | 0.138        |                     |
|           | <b>NeOProM</b> | <b>430 (50.6)</b>              | <b>850</b>  | <b>372 (44.9)</b>               | <b>828</b>  | <b>1.11 (1.01, 1.23)</b>         | <b>0.026</b> |                     |
| SGA:      | SUPPORT        | 331 (57.7)                     | 574         | 333 (58.4)                      | 570         | 0.99 (0.89, 1.09)                | 0.824        | 0.610               |
| Trialist  | COT            | 265 (50.6)                     | 524         | 251 (48.3)                      | 520         | 1.02 (0.91, 1.15)                | 0.719        |                     |
| defined - | BOOST II NZ    | 56 (37.3)                      | 150         | 66 (42.6)                       | 155         | 0.88 (0.68, 1.14)                | 0.320        |                     |
| No        | BOOST II UK    | 204 (51.4)                     | 397         | 182 (46.0)                      | 396         | 1.14 (0.99, 1.30)                | 0.069        |                     |
|           | BOOST II AUS   | 197 (42.3)                     | 466         | 182 (39.0)                      | 467         | 1.08 (0.93, 1.26)                | 0.292        |                     |
|           | <b>NeOProM</b> | <b>1053(49.9)</b>              | <b>2111</b> | <b>1014(48.1)</b>               | <b>2108</b> | <b>1.03 (0.97, 1.10)</b>         | <b>0.288</b> |                     |
| Yes       | SUPPORT        | 33 (82.5)                      | 40          | 41 (75.9)                       | 54          | 1.09 (0.88, 1.34)                | 0.420        |                     |
|           | COT            | 33 (61.1)                      | 54          | 32 (65.3)                       | 49          | 0.94 (0.70, 1.26)                | 0.679        |                     |
|           | BOOST II NZ    | 9 (52.9)                       | 17          | 8 (61.5)                        | 13          | 0.79 (0.44, 1.45)                | 0.452        |                     |
|           | BOOST II UK    | 40 (54.1)                      | 74          | 35 (50.7)                       | 69          | 3.04 (0.48, 19.0)                | 0.236        |                     |
|           | BOOST II AUS   | 48 (61.5)                      | 78          | 35 (47.9)                       | 73          | 1.27 (0.96, 1.68)                | 0.097        |                     |
|           | <b>NeOProM</b> | <b>163 (62.0)</b>              | <b>263</b>  | <b>151 (58.5)</b>               | <b>258</b>  | <b>1.07 (0.94, 1.22)</b>         | <b>0.307</b> |                     |
| SGA:      | SUPPORT        | 300 (57.3)                     | 524         | 291 (56.9)                      | 511         | 1.01 (0.90, 1.12)                | 0.888        | 0.750               |
| NeOProM   | COT            | 265 (50.6)                     | 524         | 251 (48.3)                      | 520         | 1.02 (0.91, 1.15)                | 0.719        |                     |
| defined - | BOOST II NZ    | 56 (37.3)                      | 150         | 66 (42.6)                       | 155         | 0.88 (0.68, 1.14)                | 0.320        |                     |
| No        | BOOST II UK    | 214 (51.4)                     | 416         | 191 (46.0)                      | 415         | 1.12 (0.98, 1.29)                | 0.093        |                     |
|           | BOOST II AUS   | 197 (42.3)                     | 466         | 182 (39.0)                      | 467         | 1.08 (0.93, 1.26)                | 0.292        |                     |
|           | <b>NeOProM</b> | <b>1032(49.6)</b>              | <b>2080</b> | <b>981 (47.4)</b>               | <b>2068</b> | <b>1.04 (0.98, 1.10)</b>         | <b>0.203</b> |                     |
| Yes       | SUPPORT        | 64 (71.1)                      | 90          | 83 (73.5)                       | 113         | 0.97 (0.81, 1.16)                | 0.737        |                     |
|           | COT            | 33 (61.1)                      | 54          | 32 (65.3)                       | 49          | 0.94 (0.70, 1.26)                | 0.679        |                     |
|           | BOOST II NZ    | 9 (52.9)                       | 17          | 8 (61.5)                        | 13          | 0.79 (0.44, 1.45)                | 0.452        |                     |
|           | BOOST II UK    | 31 (54.4)                      | 57          | 29 (54.7)                       | 53          | 1.00 (0.71, 1.41)                | 0.990        |                     |
|           | BOOST II AUS   | 48 (61.5)                      | 78          | 35 (47.9)                       | 73          | 1.27 (0.96, 1.68)                | 0.097        |                     |
|           | <b>NeOProM</b> | <b>185 (62.5)</b>              | <b>296</b>  | <b>187 (62.1)</b>               | <b>301</b>  | <b>1.00 (0.88, 1.13)</b>         | <b>0.980</b> |                     |

**# Supportive analysis of primary outcome:** including using alternative sources of information for classifying major disability as used within individual trials. This may have included a Bayley-II Mental Developmental Index (MDI) score <70, or another validated assessment tool (e.g. Griffiths test), or a paediatrician assessment, or parent-reported measure of neurodevelopmental impairment (e.g. able to speak less than 5-10 words) or other measures.

\*Analysis adjusted for trial and multiple births

#### **Abbreviations/definitions**

CI: confidence interval; RR: relative risk; GA: gestational age; SUPPORT: Surfactant Positive Airway Pressure and Pulse Oximetry Trial; COT: Canadian Oxygen Trial; BOOST: Benefits of Oxygen Saturation Targeting; NZ: New Zealand; UK: United Kingdom; AUS: Australia; NeOProM: Neonatal Oxygenation Prospective Meta-analysis; inborn: born inside the treating center; outborn: born outside the treating center (e.g. transferred from another hospital); vaginal: mode of delivery through the vagina; Caesarean: mode of delivery via surgical procedure; ANS: antenatal corticosteroids; singleton: child born as a single birth; multiple: more than one child per birth; start<6 hrs: intervention commenced less than 6 hours after birth; start>=6 hrs: intervention commenced greater than or equal to 6 hours after birth; original software: original oximeter software; revised software: revised oximeter software; SGA: small for gestational age; SGA NeOProM defined: small for gestational age as per definition used by NeOProM collaboration, i.e. less than 10th percentile using charts from Kramer et al.<sup>1</sup>

The subgroup analysis by oximeter software type (original vs revised) excludes n=74 infants in COT who were exposed to both the original and revised software.

Empty cells (.) indicate data not collected or not applicable in this trial.

**eTable 6. Death or major disability (secondary analysis)\*, by subgroups**

|           |                | Lower Oxygen Saturation Target |             | Higher Oxygen Saturation Target |             | Adjusted* Relative Risk (95% CI) |              |                     |
|-----------|----------------|--------------------------------|-------------|---------------------------------|-------------|----------------------------------|--------------|---------------------|
| Subgroup  | Trial          | n (%)                          | N           | n (%)                           | N           | Adjusted RR                      | p-value      | interaction p-value |
| GA<26 wks | SUPPORT        | 126 (48.3)                     | 261         | 139 (50.2)                      | 277         | 0.96 (0.81, 1.15)                | 0.659        | 0.660               |
|           | COT            | 106 (42.9)                     | 247         | 105 (43.6)                      | 241         | 0.98 (0.81, 1.19)                | 0.839        |                     |
|           | BOOST NZ       | 23 (37.1)                      | 62          | 20 (33.9)                       | 59          | 1.07 (0.68, 1.67)                | 0.775        |                     |
|           | BOOST II UK    | 115 (64.6)                     | 178         | 100 (59.2)                      | 169         | 1.09 (0.93, 1.29)                | 0.296        |                     |
|           | BOOST II AUS   | 95 (43.2)                      | 220         | 84 (37.5)                       | 224         | 1.11 (0.89, 1.39)                | 0.366        |                     |
|           | <b>NeOProM</b> | <b>465 (48.0)</b>              | <b>968</b>  | <b>448 (46.2)</b>               | <b>970</b>  | <b>1.04 (0.95, 1.14)</b>         | <b>0.389</b> |                     |
| GA≥26 wks | SUPPORT        | 91 (25.9)                      | 352         | 83 (23.9)                       | 347         | 1.08 (0.84, 1.41)                | 0.544        |                     |
|           | COT            | 74 (23.9)                      | 309         | 62 (20.0)                       | 310         | 1.16 (0.86, 1.57)                | 0.343        |                     |
|           | BOOST NZ       | 12 (14.8)                      | 81          | 19 (22.9)                       | 83          | 0.65 (0.35, 1.23)                | 0.186        |                     |
|           | BOOST II UK    | 79 (37.8)                      | 209         | 71 (33.2)                       | 214         | 1.14 (0.87, 1.48)                | 0.335        |                     |
|           | BOOST II AUS   | 63 (22.1)                      | 285         | 60 (21.3)                       | 282         | 1.06 (0.78, 1.44)                | 0.705        |                     |
|           | <b>NeOProM</b> | <b>319 (25.8)</b>              | <b>1236</b> | <b>295 (23.9)</b>               | <b>1236</b> | <b>1.08 (0.94, 1.24)</b>         | <b>0.261</b> |                     |
| Inborn    | SUPPORT        | 217 (35.4)                     | 613         | 222 (35.6)                      | 624         | 1.00 (0.86, 1.16)                | 0.979        | 0.173               |
|           | COT            | 165 (31.9)                     | 518         | 149 (29.8)                      | 500         | 1.05 (0.87, 1.25)                | 0.624        |                     |
|           | BOOST NZ       | 33 (24.4)                      | 135         | 36 (26.9)                       | 134         | 0.90 (0.61, 1.34)                | 0.619        |                     |
|           | BOOST II UK    | 173 (50.3)                     | 344         | 145 (43.2)                      | 336         | 1.17 (0.99, 1.37)                | 0.060        |                     |
|           | BOOST II AUS   | 146 (31.3)                     | 467         | 129 (27.4)                      | 471         | 1.14 (0.93, 1.38)                | 0.201        |                     |
|           | <b>NeOProM</b> | <b>734 (35.3)</b>              | <b>2077</b> | <b>681 (33.0)</b>               | <b>2065</b> | <b>1.07 (0.99, 1.17)</b>         | <b>0.092</b> |                     |
| Outborn   | SUPPORT        |                                | .           |                                 | .           |                                  | .            |                     |
|           | COT            | 15 (39.5)                      | 38          | 18 (35.3)                       | 51          | 1.07 (0.63, 1.84)                | 0.795        |                     |
|           | BOOST NZ       | 2 (25.0)                       | 8           | 3 (37.5)                        | 8           | 0.67 (0.15, 2.98)                | 0.596        |                     |
|           | BOOST II UK    | 21 (48.8)                      | 43          | 26 (55.3)                       | 47          | 0.86 (0.58, 1.26)                | 0.432        |                     |
|           | BOOST II AUS   | 12 (31.6)                      | 38          | 15 (42.9)                       | 35          | 0.74 (0.41, 1.34)                | 0.323        |                     |
|           | <b>NeOProM</b> | <b>50 (39.4)</b>               | <b>127</b>  | <b>62 (44.0)</b>                | <b>141</b>  | <b>0.88 (0.67, 1.15)</b>         | <b>0.347</b> |                     |
| Vaginal   | SUPPORT        | 71 (35.9)                      | 198         | 69 (33.3)                       | 207         | 1.07 (0.82, 1.40)                | 0.629        | 0.785               |
|           | COT            | 68 (33.0)                      | 206         | 70 (30.7)                       | 228         | 1.05 (0.81, 1.37)                | 0.710        |                     |
|           | BOOST NZ       | 19 (29.7)                      | 64          | 19 (28.4)                       | 67          | 1.01 (0.60, 1.68)                | 0.974        |                     |
|           | BOOST II UK    | 123 (51.7)                     | 238         | 115 (48.7)                      | 236         | 1.06 (0.89, 1.27)                | 0.516        |                     |
|           | BOOST II AUS   | 79 (32.9)                      | 240         | 69 (30.1)                       | 229         | 1.08 (0.83, 1.41)                | 0.575        |                     |
|           | <b>NeOProM</b> | <b>360 (38.1)</b>              | <b>946</b>  | <b>342 (35.4)</b>               | <b>967</b>  | <b>1.06 (0.95, 1.19)</b>         | <b>0.309</b> |                     |
| Caesarean | SUPPORT        | 146 (35.2)                     | 415         | 153 (36.7)                      | 417         | 0.96 (0.80, 1.16)                | 0.700        |                     |
|           | COT            | 110 (31.6)                     | 348         | 97 (30.1)                       | 322         | 1.03 (0.82, 1.29)                | 0.798        |                     |
|           | BOOST NZ       | 16 (20.3)                      | 79          | 20 (26.7)                       | 75          | 0.76 (0.44, 1.33)                | 0.334        |                     |
|           | BOOST II UK    | 71 (47.7)                      | 149         | 56 (38.1)                       | 147         | 1.25 (0.96, 1.63)                | 0.095        |                     |
|           | BOOST II AUS   | 78 (29.5)                      | 264         | 73 (26.6)                       | 274         | 1.11 (0.86, 1.44)                | 0.419        |                     |
|           | <b>NeOProM</b> | <b>421 (33.5)</b>              | <b>1255</b> | <b>399 (32.3)</b>               | <b>1235</b> | <b>1.04 (0.93, 1.16)</b>         | <b>0.466</b> |                     |
| ANS - No  | SUPPORT        | 6 (30.0)                       | 20          | 9 (32.1)                        | 28          | 0.96 (0.40, 2.33)                | 0.928        | 0.293               |
|           | COT            | 37 (54.4)                      | 68          | 30 (54.5)                       | 55          | 0.99 (0.73, 1.36)                | 0.971        |                     |
|           | BOOST NZ       | 4 (23.5)                       | 17          | 5 (33.3)                        | 15          | 0.43 (0.08, 2.37)                | 0.334        |                     |
|           | BOOST II UK    | 19 (55.9)                      | 34          | 23 (60.5)                       | 38          | 0.96 (0.64, 1.44)                | 0.849        |                     |

eTable 6. Death or major disability (secondary analysis)<sup>†</sup>, by subgroups (continued)

|             |                | Lower Oxygen Saturation Target |             | Higher Oxygen Saturation Target |             | Adjusted* Relative Risk (95% CI) |              |                     |
|-------------|----------------|--------------------------------|-------------|---------------------------------|-------------|----------------------------------|--------------|---------------------|
| Subgroup    | Trial          | n (%)                          | N           | n (%)                           | N           | Adjusted RR                      | p-value      | interaction p-value |
|             | BOOST II AUS   | 17 (32.7)                      | 52          | 16 (42.1)                       | 38          | 0.78 (0.45, 1.34)                | 0.366        |                     |
|             | <b>NeOProM</b> | <b>83 (43.5)</b>               | <b>191</b>  | <b>83 (47.7)</b>                | <b>174</b>  | <b>0.93 (0.75, 1.16)</b>         | <b>0.536</b> |                     |
| ANS - Yes   | SUPPORT        | 211 (35.6)                     | 593         | 212 (35.6)                      | 595         | 1.00 (0.86, 1.17)                | 0.974        |                     |
|             | COT            | 142 (29.2)                     | 486         | 135 (27.3)                      | 494         | 1.04 (0.86, 1.26)                | 0.693        |                     |
|             | BOOST NZ       | 31 (24.6)                      | 126         | 34 (26.8)                       | 127         | 0.92 (0.61, 1.39)                | 0.687        |                     |
|             | BOOST II UK    | 174 (49.6)                     | 351         | 147 (42.9)                      | 343         | 1.16 (0.98, 1.36)                | 0.080        |                     |
|             | BOOST II AUS   | 141 (31.3)                     | 451         | 127 (27.4)                      | 463         | 1.13 (0.93, 1.38)                | 0.212        |                     |
|             | <b>NeOProM</b> | <b>699 (34.8)</b>              | <b>2007</b> | <b>655 (32.4)</b>               | <b>2022</b> | <b>1.07 (0.99, 1.17)</b>         | <b>0.104</b> |                     |
| Male        | SUPPORT        | 128 (40.1)                     | 319         | 139 (39.6)                      | 351         | 1.01 (0.84, 1.22)                | 0.910        | 0.852               |
|             | COT            | 118 (37.8)                     | 312         | 113 (37.9)                      | 298         | 0.99 (0.81, 1.21)                | 0.894        |                     |
|             | BOOST NZ       | 24 (30.8)                      | 78          | 21 (29.2)                       | 72          | 1.04 (0.64, 1.70)                | 0.866        |                     |
|             | BOOST II UK    | 111 (54.4)                     | 204         | 98 (49.0)                       | 200         | 1.11 (0.92, 1.34)                | 0.298        |                     |
|             | BOOST II AUS   | 105 (39.8)                     | 264         | 87 (33.2)                       | 262         | 1.18 (0.94, 1.47)                | 0.162        |                     |
|             | <b>NeOProM</b> | <b>486 (41.3)</b>              | <b>1177</b> | <b>458 (38.7)</b>               | <b>1183</b> | <b>1.06 (0.96, 1.17)</b>         | <b>0.217</b> |                     |
| Female      | SUPPORT        | 89 (30.3)                      | 294         | 83 (30.4)                       | 273         | 1.00 (0.77, 1.29)                | 0.989        |                     |
|             | COT            | 62 (25.4)                      | 244         | 54 (21.3)                       | 253         | 1.19 (0.86, 1.63)                | 0.292        |                     |
|             | BOOST NZ       | 11 (16.9)                      | 65          | 18 (25.7)                       | 70          | 0.89 (0.46, 1.75)                | 0.742        |                     |
|             | BOOST II UK    | 83 (45.4)                      | 183         | 73 (39.9)                       | 183         | 1.14 (0.90, 1.45)                | 0.284        |                     |
|             | BOOST II AUS   | 53 (22.0)                      | 241         | 57 (23.4)                       | 244         | 0.96 (0.69, 1.32)                | 0.784        |                     |
|             | <b>NeOProM</b> | <b>298 (29.0)</b>              | <b>1027</b> | <b>285 (27.9)</b>               | <b>1023</b> | <b>1.05 (0.92, 1.20)</b>         | <b>0.489</b> |                     |
| Singleton   | SUPPORT        | 161 (35.1)                     | 459         | 157 (34.4)                      | 456         | 1.02 (0.85, 1.22)                | 0.837        | 0.176               |
|             | COT            | 114 (30.8)                     | 370         | 107 (27.9)                      | 383         | 1.10 (0.88, 1.38)                | 0.387        |                     |
|             | BOOST NZ       | 24 (23.1)                      | 104         | 28 (26.4)                       | 106         | 0.87 (0.54, 1.40)                | 0.576        |                     |
|             | BOOST II UK    | 135 (50.2)                     | 269         | 117 (43.3)                      | 270         | 1.16 (0.97, 1.39)                | 0.112        |                     |
|             | BOOST II AUS   | 125 (32.6)                     | 383         | 107 (27.7)                      | 386         | 1.18 (0.95, 1.46)                | 0.138        |                     |
|             | <b>NeOProM</b> | <b>559 (35.3)</b>              | <b>1585</b> | <b>516 (32.2)</b>               | <b>1601</b> | <b>1.10 (1.00, 1.21)</b>         | <b>0.060</b> |                     |
| Multiple    | SUPPORT        | 56 (36.4)                      | 154         | 65 (38.7)                       | 168         | 0.94 (0.69, 1.28)                | 0.698        |                     |
|             | COT            | 66 (35.5)                      | 186         | 60 (35.7)                       | 168         | 0.95 (0.74, 1.23)                | 0.704        |                     |
|             | BOOST NZ       | 11 (28.2)                      | 39          | 11 (30.6)                       | 36          | 0.91 (0.48, 1.71)                | 0.766        |                     |
|             | BOOST II UK    | 59 (50.0)                      | 118         | 54 (47.8)                       | 113         | 1.05 (0.81, 1.37)                | 0.704        |                     |
|             | BOOST II AUS   | 33 (27.0)                      | 122         | 37 (30.8)                       | 120         | 0.92 (0.64, 1.32)                | 0.638        |                     |
|             | <b>NeOProM</b> | <b>225 (36.3)</b>              | <b>619</b>  | <b>227 (37.5)</b>               | <b>605</b>  | <b>0.97 (0.84, 1.12)</b>         | <b>0.696</b> |                     |
| start<6 hrs | SUPPORT        | 210 (35.2)                     | 597         | 213 (35.1)                      | 607         | 1.00 (0.86, 1.18)                | 0.952        | 0.493               |
|             | COT            | 6 (25.0)                       | 24          | 9 (37.5)                        | 24          | 0.29 (0.01, 16.1)                | 0.544        |                     |
|             | BOOST NZ       | 8 (32.0)                       | 25          | 6 (26.1)                        | 23          | 1.45 (0.65, 3.24)                | 0.365        |                     |
|             | BOOST II UK    |                                | .           |                                 | .           |                                  | .            |                     |
|             | BOOST II AUS   | 17 (32.7)                      | 52          | 17 (30.9)                       | 55          | 0.89 (0.50, 1.60)                | 0.704        |                     |
|             | <b>NeOProM</b> | <b>241 (34.5)</b>              | <b>698</b>  | <b>245 (34.6)</b>               | <b>709</b>  | <b>1.00 (0.86, 1.15)</b>         | <b>0.957</b> |                     |
| >=6 hrs     | SUPPORT        | 1 (20.0)                       | 5           | 1 (20.0)                        | 5           | 0.48 (0.08, 2.89)                | 0.424        |                     |
|             | COT            | 174 (32.7)                     | 532         | 158 (30.0)                      | 527         | 1.07 (0.90, 1.27)                | 0.469        |                     |
|             | BOOST NZ       | 27 (22.9)                      | 118         | 32 (27.1)                       | 118         | 0.83 (0.54, 1.28)                | 0.405        |                     |

eTable 6. Death or major disability (secondary analysis)<sup>†</sup>, by subgroups (continued)

|           |                | Lower Oxygen Saturation Target |             | Higher Oxygen Saturation Target |             | Adjusted* Relative Risk (95% CI) |              |                     |
|-----------|----------------|--------------------------------|-------------|---------------------------------|-------------|----------------------------------|--------------|---------------------|
| Subgroup  | Trial          | n (%)                          | N           | n (%)                           | N           | Adjusted RR                      | p-value      | interaction p-value |
|           | BOOST II UK    |                                | .           |                                 | .           |                                  | .            |                     |
|           | BOOST II AUS   | 141 (31.2)                     | 452         | 126 (28.0)                      | 450         | 1.13 (0.93, 1.37)                | 0.235        |                     |
|           | <b>NeOProM</b> | <b>343 (31.0)</b>              | <b>1107</b> | <b>317 (28.8)</b>               | <b>1100</b> | <b>1.06 (0.94, 1.20)</b>         | <b>0.327</b> |                     |
| Original  | SUPPORT        | 217 (35.4)                     | 613         | 222 (35.6)                      | 624         | 1.00 (0.86, 1.16)                | 0.979        | 0.238               |
| software  | COT            | 91 (34.2)                      | 266         | 83 (31.8)                       | 261         | 1.07 (0.85, 1.35)                | 0.560        |                     |
|           | BOOST NZ       | 35 (24.5)                      | 143         | 39 (27.5)                       | 142         | 0.89 (0.60, 1.30)                | 0.536        |                     |
|           | BOOST II UK    | 42 (51.2)                      | 82          | 45 (48.9)                       | 92          | 1.02 (0.76, 1.38)                | 0.877        |                     |
|           | BOOST II AUS   | 93 (30.2)                      | 308         | 88 (27.8)                       | 317         | 1.09 (0.86, 1.39)                | 0.460        |                     |
|           | <b>NeOProM</b> | <b>478 (33.9)</b>              | <b>1412</b> | <b>477 (33.2)</b>               | <b>1436</b> | <b>1.02 (0.92, 1.13)</b>         | <b>0.682</b> |                     |
| Revised   | SUPPORT        |                                | .           |                                 | .           |                                  | .            |                     |
| software  | COT            | 84 (32.2)                      | 261         | 72 (28.7)                       | 251         | 1.10 (0.84, 1.43)                | 0.487        |                     |
|           | BOOST NZ       |                                | .           |                                 | .           |                                  | .            |                     |
|           | BOOST II UK    | 152 (49.8)                     | 305         | 126 (43.3)                      | 291         | 1.15 (0.97, 1.37)                | 0.106        |                     |
|           | BOOST II AUS   | 65 (33.0)                      | 197         | 56 (29.6)                       | 189         | 1.10 (0.82, 1.47)                | 0.532        |                     |
|           | <b>NeOProM</b> | <b>301 (39.4)</b>              | <b>763</b>  | <b>254 (34.7)</b>               | <b>731</b>  | <b>1.13 (0.99, 1.29)</b>         | <b>0.060</b> |                     |
| SGA:      | SUPPORT        | 187 (32.6)                     | 573         | 189 (33.2)                      | 570         | 0.99 (0.83, 1.17)                | 0.867        | 0.685               |
| Trialist  | COT            | 160 (31.8)                     | 503         | 146 (29.0)                      | 504         | 1.06 (0.88, 1.27)                | 0.528        |                     |
| defined - | BOOST II NZ    | 30 (23.6)                      | 127         | 33 (25.4)                       | 130         | 0.93 (0.61, 1.41)                | 0.723        |                     |
| No        | BOOST II UK    | 163 (50.0)                     | 326         | 141 (43.5)                      | 324         | 1.15 (0.98, 1.35)                | 0.091        |                     |
|           | BOOST II AUS   | 127 (29.6)                     | 429         | 117 (27.0)                      | 433         | 1.08 (0.88, 1.34)                | 0.457        |                     |
|           | <b>NeOProM</b> | <b>667 (34.1)</b>              | <b>1958</b> | <b>626 (31.9)</b>               | <b>1961</b> | <b>1.06 (0.98, 1.16)</b>         | <b>0.164</b> |                     |
| Yes       | SUPPORT        | 30 (75.0)                      | 40          | 33 (61.1)                       | 54          | 1.20 (0.91, 1.59)                | 0.186        |                     |
|           | COT            | 20 (37.7)                      | 53          | 21 (44.7)                       | 47          | 0.88 (0.56, 1.39)                | 0.585        |                     |
|           | BOOST II NZ    | 5 (31.3)                       | 16          | 6 (50.0)                        | 12          | 0.57 (0.23, 1.42)                | 0.228        |                     |
|           | BOOST II UK    | 30 (50.8)                      | 59          | 27 (48.2)                       | 56          | 2.94 (0.48, 18.0)                | 0.243        |                     |
|           | BOOST II AUS   | 31 (40.8)                      | 76          | 27 (37.0)                       | 73          | 1.10 (0.74, 1.65)                | 0.744        |                     |
|           | <b>NeOProM</b> | <b>116 (47.5)</b>              | <b>244</b>  | <b>114 (47.1)</b>               | <b>242</b>  | <b>1.03 (0.86, 1.24)</b>         | <b>0.747</b> |                     |
| SGA:      | SUPPORT        | 168 (32.1)                     | 523         | 164 (32.1)                      | 511         | 1.01 (0.84, 1.21)                | 0.939        | 0.431               |
| NeOProM   | COT            | 160 (31.8)                     | 503         | 146 (29.0)                      | 504         | 1.06 (0.88, 1.27)                | 0.528        |                     |
| defined - | BOOST II NZ    | 30 (23.6)                      | 127         | 33 (25.4)                       | 130         | 0.93 (0.61, 1.41)                | 0.723        |                     |
| No        | BOOST II UK    | 171 (49.9)                     | 343         | 148 (43.5)                      | 340         | 1.14 (0.97, 1.34)                | 0.111        |                     |
|           | BOOST II AUS   | 127 (29.6)                     | 429         | 117 (27.0)                      | 433         | 1.08 (0.88, 1.34)                | 0.457        |                     |
|           | <b>NeOProM</b> | <b>656 (34.1)</b>              | <b>1925</b> | <b>608 (31.7)</b>               | <b>1918</b> | <b>1.07 (0.98, 1.17)</b>         | <b>0.126</b> |                     |
| Yes       | SUPPORT        | 49 (54.4)                      | 90          | 58 (51.3)                       | 113         | 1.03 (0.79, 1.34)                | 0.829        |                     |
|           | COT            | 20 (37.7)                      | 53          | 21 (44.7)                       | 47          | 0.88 (0.56, 1.39)                | 0.585        |                     |
|           | BOOST II NZ    | 5 (31.3)                       | 16          | 6 (50.0)                        | 12          | 0.57 (0.23, 1.42)                | 0.228        |                     |
|           | BOOST II UK    | 23 (52.3)                      | 44          | 23 (53.5)                       | 43          | 0.98 (0.66, 1.47)                | 0.926        |                     |
|           | BOOST II AUS   | 31 (40.8)                      | 76          | 27 (37.0)                       | 73          | 1.10 (0.74, 1.65)                | 0.744        |                     |
|           | <b>NeOProM</b> | <b>128 (45.9)</b>              | <b>279</b>  | <b>135 (46.9)</b>               | <b>288</b>  | <b>0.97 (0.81, 1.16)</b>         | <b>0.761</b> |                     |

+ **Secondary analysis:** composite outcome of death or major disability by 18-24 months' age, corrected for prematurity. Major disability is any of the following: Bayley-III Developmental Assessment cognitive score <70 and/or language score <70; severe visual loss; cerebral palsy with Gross Motor Function Classification System (GMFCS) level 2 or higher at 18-24 months' age, corrected for prematurity; or deafness requiring hearing aids.

\*Analysis adjusted for trial and multiple births

### **Abbreviations/definitions**

CI: confidence interval; RR: relative risk; GA: gestational age; SUPPORT: Surfactant Positive Airway Pressure and Pulse Oximetry Trial; COT: Canadian Oxygen Trial; BOOST: Benefits of Oxygen Saturation Targeting; NZ: New Zealand; UK: United Kingdom; AUS: Australia; NeOProM: Neonatal Oxygenation Prospective Meta-analysis; inborn: born inside the treating center; outborn: born outside the treating center (e.g. transferred from another hospital); vaginal: mode of delivery through the vagina; Caesarean: mode of delivery via surgical procedure; ANS: antenatal corticosteroids; singleton: child born as a single birth; multiple: more than one child per birth; start<6 hrs: intervention commenced less than 6 hours after birth; start>=6 hrs: intervention commenced greater than or equal to 6 hours after birth; original software: original oximeter software; revised software: revised oximeter software; SGA: small for gestational age; SGA NeOProM defined: small for gestational age as per definition used by NeOProM collaboration, i.e. less than 10th percentile using charts from Kramer et al.<sup>1</sup>

The subgroup analysis by oximeter software type (original vs revised) excludes n=74 infants in COT who were exposed to both the original and revised software.

Empty cells (.) indicate data not collected or not applicable in this trial.

**eTable 7. Death or major disability (trialist defined)~, by subgroups**

|           |                | Lower Oxygen Saturation Target |             | Higher Oxygen Saturation Target |             | Adjusted* Relative Risk (95% CI) |              |                     |
|-----------|----------------|--------------------------------|-------------|---------------------------------|-------------|----------------------------------|--------------|---------------------|
| Subgroup  | Trial          | n (%)                          | N           | n (%)                           | N           | Adjusted RR                      | p-value      | interaction p-value |
| GA<26 wks | SUPPORT        | 115 (44.1)                     | 261         | 112 (40.6)                      | 276         | 1.09 (0.89, 1.33)                | 0.424        | 0.868               |
|           | COT            | 154 (60.6)                     | 254         | 148 (59.9)                      | 247         | 1.00 (0.88, 1.14)                | 1.000        |                     |
|           | BOOST NZ       | 38 (52.8)                      | 72          | 35 (48.6)                       | 72          | 1.15 (0.84, 1.56)                | 0.385        |                     |
|           | BOOST II UK    | 136 (65.4)                     | 208         | 122 (58.1)                      | 210         | 1.14 (0.98, 1.32)                | 0.100        |                     |
|           | BOOST II AUS   | 131 (56.0)                     | 234         | 120 (51.1)                      | 235         | 1.07 (0.91, 1.26)                | 0.434        |                     |
|           | <b>NeOProM</b> | <b>574 (55.8)</b>              | <b>1029</b> | <b>537 (51.6)</b>               | <b>1040</b> | <b>1.07 (1.00, 1.16)</b>         | <b>0.065</b> |                     |
| GA≥26 wks | SUPPORT        | 70 (19.9)                      | 351         | 59 (17.1)                       | 346         | 1.18 (0.86, 1.61)                | 0.315        |                     |
|           | COT            | 144 (44.4)                     | 324         | 135 (41.9)                      | 322         | 1.03 (0.87, 1.21)                | 0.765        |                     |
|           | BOOST NZ       | 27 (28.4)                      | 95          | 41 (42.7)                       | 96          | 0.65 (0.44, 0.95)                | 0.026        |                     |
|           | BOOST II UK    | 109 (41.1)                     | 265         | 98 (38.0)                       | 258         | 1.08 (0.88, 1.34)                | 0.461        |                     |
|           | BOOST II AUS   | 116 (36.8)                     | 315         | 97 (31.3)                       | 310         | 1.18 (0.96, 1.44)                | 0.125        |                     |
|           | <b>NeOProM</b> | <b>466 (34.5)</b>              | <b>1350</b> | <b>430 (32.3)</b>               | <b>1332</b> | <b>1.06 (0.96, 1.17)</b>         | <b>0.288</b> |                     |
| Inborn    | SUPPORT        | 185 (30.2)                     | 612         | 171 (27.5)                      | 622         | 1.10 (0.92, 1.32)                | 0.278        | 0.690               |
|           | COT            | 277 (51.5)                     | 538         | 256 (49.6)                      | 516         | 1.01 (0.91, 1.13)                | 0.821        |                     |
|           | BOOST NZ       | 62 (39.5)                      | 157         | 72 (46.2)                       | 156         | 0.87 (0.68, 1.11)                | 0.269        |                     |
|           | BOOST II UK    | 217 (51.9)                     | 418         | 193 (47.0)                      | 411         | 1.12 (0.98, 1.28)                | 0.096        |                     |
|           | BOOST II AUS   | 228 (45.1)                     | 506         | 198 (39.2)                      | 505         | 1.12 (0.98, 1.29)                | 0.104        |                     |
|           | <b>NeOProM</b> | <b>969 (43.4)</b>              | <b>2231</b> | <b>890 (40.3)</b>               | <b>2210</b> | <b>1.07 (1.00, 1.14)</b>         | <b>0.052</b> |                     |
| Outborn   | SUPPORT        |                                | .           |                                 | .           |                                  | .            |                     |
|           | COT            | 21 (52.5)                      | 40          | 27 (50.9)                       | 53          | 1.02 (0.71, 1.47)                | 0.915        |                     |
|           | BOOST NZ       | 3 (30.0)                       | 10          | 4 (33.3)                        | 12          | 0.85 (0.25, 2.93)                | 0.797        |                     |
|           | BOOST II UK    | 28 (50.9)                      | 55          | 27 (47.4)                       | 57          | 1.08 (0.72, 1.60)                | 0.719        |                     |
|           | BOOST II AUS   | 19 (44.2)                      | 43          | 19 (47.5)                       | 40          | 0.94 (0.60, 1.48)                | 0.786        |                     |
|           | <b>NeOProM</b> | <b>71 (48.0)</b>               | <b>148</b>  | <b>77 (47.5)</b>                | <b>162</b>  | <b>1.02 (0.81, 1.28)</b>         | <b>0.887</b> |                     |
| Vaginal   | SUPPORT        | 62 (31.5)                      | 197         | 52 (25.2)                       | 206         | 1.24 (0.90, 1.69)                | 0.187        | 0.179               |
|           | COT            | 120 (56.1)                     | 214         | 109 (47.4)                      | 230         | 1.18 (0.99, 1.41)                | 0.069        |                     |
|           | BOOST NZ       | 31 (41.3)                      | 75          | 37 (46.8)                       | 79          | 0.88 (0.61, 1.27)                | 0.493        |                     |
|           | BOOST II UK    | 152 (54.1)                     | 281         | 143 (49.5)                      | 289         | 1.11 (0.95, 1.29)                | 0.210        |                     |
|           | BOOST II AUS   | 122 (46.2)                     | 264         | 105 (42.5)                      | 247         | 1.08 (0.90, 1.31)                | 0.403        |                     |
|           | <b>NeOProM</b> | <b>487 (47.2)</b>              | <b>1031</b> | <b>446 (42.4)</b>               | <b>1051</b> | <b>1.11 (1.01, 1.22)</b>         | <b>0.023</b> |                     |
| Caesarean | SUPPORT        | 123 (29.6)                     | 415         | 119 (28.6)                      | 416         | 1.04 (0.84, 1.30)                | 0.712        |                     |
|           | COT            | 176 (48.6)                     | 362         | 173 (51.2)                      | 338         | 0.93 (0.81, 1.06)                | 0.254        |                     |
|           | BOOST NZ       | 34 (37.0)                      | 92          | 39 (43.8)                       | 89          | 0.86 (0.62, 1.21)                | 0.395        |                     |
|           | BOOST II UK    | 93 (48.4)                      | 192         | 77 (43.0)                       | 179         | 1.12 (0.90, 1.39)                | 0.308        |                     |
|           | BOOST II AUS   | 123 (43.5)                     | 283         | 110 (37.4)                      | 294         | 1.14 (0.95, 1.37)                | 0.171        |                     |
|           | <b>NeOProM</b> | <b>549 (40.8)</b>              | <b>1344</b> | <b>518 (39.4)</b>               | <b>1316</b> | <b>1.02 (0.94, 1.11)</b>         | <b>0.667</b> |                     |
| ANS - No  | SUPPORT        | 5 (25.0)                       | 20          | 4 (14.3)                        | 28          | 1.77 (0.55, 5.71)                | 0.340        | 0.282               |
|           | COT            | 47 (69.1)                      | 68          | 41 (71.9)                       | 57          | 0.96 (0.77, 1.19)                | 0.706        |                     |
|           | BOOST NZ       | 9 (45.0)                       | 20          | 9 (52.9)                        | 17          | 0.85 (0.44, 1.64)                | 0.643        |                     |
|           | BOOST II UK    | 22 (57.9)                      | 38          | 28 (62.2)                       | 45          | 0.95 (0.67, 1.35)                | 0.770        |                     |

eTable 7. Death or major disability (trialist defined)~, by subgroups (continued)

|             |                | Lower Oxygen Saturation Target |             | Higher Oxygen Saturation Target |             | Adjusted* Relative Risk (95% CI) |              |                     |
|-------------|----------------|--------------------------------|-------------|---------------------------------|-------------|----------------------------------|--------------|---------------------|
| Subgroup    | Trial          | n (%)                          | N           | n (%)                           | N           | Adjusted RR                      | p-value      | interaction p-value |
|             | BOOST II AUS   | 28 (45.9)                      | 61          | 20 (50.0)                       | 40          | 0.95 (0.64, 1.42)                | 0.817        |                     |
|             | <b>NeOProM</b> | <b>111 (53.6)</b>              | <b>207</b>  | <b>102 (54.5)</b>               | <b>187</b>  | <b>0.97 (0.82, 1.13)</b>         | <b>0.665</b> |                     |
| ANS - Yes   | SUPPORT        | 180 (30.4)                     | 592         | 166 (28.0)                      | 593         | 1.09 (0.91, 1.31)                | 0.334        |                     |
|             | COT            | 249 (49.0)                     | 508         | 240 (47.1)                      | 510         | 1.02 (0.90, 1.15)                | 0.767        |                     |
|             | BOOST NZ       | 56 (38.1)                      | 147         | 67 (44.4)                       | 151         | 0.87 (0.66, 1.13)                | 0.294        |                     |
|             | BOOST II UK    | 222 (51.3)                     | 433         | 191 (45.4)                      | 421         | 1.14 (0.99, 1.30)                | 0.070        |                     |
|             | BOOST II AUS   | 216 (44.5)                     | 485         | 196 (39.3)                      | 499         | 1.11 (0.96, 1.27)                | 0.158        |                     |
|             | <b>NeOProM</b> | <b>923 (42.6)</b>              | <b>2165</b> | <b>860 (39.6)</b>               | <b>2174</b> | <b>1.07 (1.00, 1.15)</b>         | <b>0.049</b> |                     |
| Male        | SUPPORT        | 107 (33.5)                     | 319         | 106 (30.2)                      | 351         | 1.11 (0.88, 1.39)                | 0.371        | 0.383               |
|             | COT            | 189 (58.9)                     | 321         | 177 (57.5)                      | 308         | 1.00 (0.88, 1.13)                | 0.940        |                     |
|             | BOOST NZ       | 45 (51.1)                      | 88          | 45 (50.6)                       | 89          | 1.02 (0.76, 1.36)                | 0.894        |                     |
|             | BOOST II UK    | 142 (56.6)                     | 251         | 126 (50.0)                      | 252         | 1.13 (0.96, 1.33)                | 0.156        |                     |
|             | BOOST II AUS   | 159 (55.4)                     | 287         | 130 (45.9)                      | 283         | 1.19 (1.02, 1.40)                | 0.028        |                     |
|             | <b>NeOProM</b> | <b>642 (50.7)</b>              | <b>1266</b> | <b>584 (45.5)</b>               | <b>1283</b> | <b>1.09 (1.01, 1.17)</b>         | <b>0.030</b> |                     |
| Female      | SUPPORT        | 78 (26.6)                      | 293         | 65 (24.0)                       | 271         | 1.12 (0.84, 1.50)                | 0.444        |                     |
|             | COT            | 109 (42.4)                     | 257         | 106 (40.6)                      | 261         | 1.03 (0.85, 1.26)                | 0.751        |                     |
|             | BOOST NZ       | 20 (25.3)                      | 79          | 31 (39.2)                       | 79          | 1.44 (0.67, 3.12)                | 0.353        |                     |
|             | BOOST II UK    | 103 (46.4)                     | 222         | 94 (43.5)                       | 216         | 1.07 (0.87, 1.31)                | 0.524        |                     |
|             | BOOST II AUS   | 88 (33.6)                      | 262         | 87 (33.2)                       | 262         | 1.02 (0.80, 1.28)                | 0.896        |                     |
|             | <b>NeOProM</b> | <b>398 (35.8)</b>              | <b>1113</b> | <b>383 (35.2)</b>               | <b>1089</b> | <b>1.03 (0.92, 1.14)</b>         | <b>0.632</b> |                     |
| Singleton   | SUPPORT        | 136 (29.7)                     | 458         | 118 (26.0)                      | 454         | 1.14 (0.93, 1.41)                | 0.213        | 0.228               |
|             | COT            | 197 (51.4)                     | 383         | 189 (48.2)                      | 392         | 1.07 (0.93, 1.23)                | 0.370        |                     |
|             | BOOST NZ       | 45 (36.9)                      | 122         | 52 (42.3)                       | 123         | 0.87 (0.64, 1.19)                | 0.389        |                     |
|             | BOOST II UK    | 169 (50.3)                     | 336         | 153 (45.8)                      | 334         | 1.10 (0.94, 1.29)                | 0.246        |                     |
|             | BOOST II AUS   | 190 (45.7)                     | 416         | 165 (39.6)                      | 417         | 1.15 (0.99, 1.35)                | 0.076        |                     |
|             | <b>NeOProM</b> | <b>737 (43.0)</b>              | <b>1715</b> | <b>677 (39.4)</b>               | <b>1720</b> | <b>1.09 (1.01, 1.18)</b>         | <b>0.028</b> |                     |
| Multiple    | SUPPORT        | 49 (31.8)                      | 154         | 53 (31.5)                       | 168         | 1.01 (0.71, 1.43)                | 0.956        |                     |
|             | COT            | 101 (51.8)                     | 195         | 94 (53.1)                       | 177         | 0.94 (0.81, 1.09)                | 0.422        |                     |
|             | BOOST NZ       | 20 (44.4)                      | 45          | 24 (53.3)                       | 45          | 0.88 (0.61, 1.25)                | 0.468        |                     |
|             | BOOST II UK    | 76 (55.5)                      | 137         | 67 (50.0)                       | 134         | 1.13 (0.91, 1.39)                | 0.268        |                     |
|             | BOOST II AUS   | 57 (42.9)                      | 133         | 52 (40.6)                       | 128         | 1.03 (0.81, 1.31)                | 0.804        |                     |
|             | <b>NeOProM</b> | <b>303 (45.6)</b>              | <b>664</b>  | <b>290 (44.5)</b>               | <b>652</b>  | <b>1.01 (0.91, 1.12)</b>         | <b>0.864</b> |                     |
| start<6 hrs | SUPPORT        | 179 (30.0)                     | 596         | 163 (26.9)                      | 605         | 1.12 (0.93, 1.34)                | 0.235        | 0.795               |
|             | COT            | 9 (36.0)                       | 25          | 14 (56.0)                       | 25          | 0.31 (0.03, 3.73)                | 0.359        |                     |
|             | BOOST NZ       | 16 (57.1)                      | 28          | 12 (42.9)                       | 28          | 1.33 (0.77, 2.29)                | 0.307        |                     |
|             | BOOST II UK    |                                |             |                                 |             |                                  |              |                     |
|             | BOOST II AUS   | 26 (45.6)                      | 57          | 24 (41.4)                       | 58          | 1.03 (0.68, 1.57)                | 0.889        |                     |
|             | <b>NeOProM</b> | <b>230 (32.6)</b>              | <b>706</b>  | <b>213 (29.7)</b>               | <b>716</b>  | <b>1.08 (0.93, 1.27)</b>         | <b>0.324</b> |                     |
| >=6 hrs     | SUPPORT        | 0                              | 5           | 1 (20.0)                        | 5           |                                  | ***          |                     |
|             | COT            | 289 (52.3)                     | 553         | 269 (49.4)                      | 544         | 1.03 (0.93, 1.15)                | 0.528        |                     |
|             | BOOST NZ       | 49 (35.3)                      | 139         | 63 (45.3)                       | 139         | 0.78 (0.59, 1.03)                | 0.085        |                     |



eTable 7. Death or major disability (trialist defined)~, by subgroups (continued)

|           |                | Lower Oxygen Saturation Target |             | Higher Oxygen Saturation Target |             | Adjusted* Relative Risk (95% CI) |              |                     |
|-----------|----------------|--------------------------------|-------------|---------------------------------|-------------|----------------------------------|--------------|---------------------|
| Subgroup  | Trial          | n (%)                          | N           | n (%)                           | N           | Adjusted RR                      | p-value      | interaction p-value |
|           | BOOST II UK    |                                | .           |                                 | .           |                                  | .            |                     |
|           | BOOST II AUS   | 220 (45.0)                     | 489         | 192 (39.5)                      | 486         | 1.13 (0.99, 1.30)                | 0.075        |                     |
|           | <b>NeOProM</b> | <b>558 (47.0)</b>              | <b>1186</b> | <b>525 (44.7)</b>               | <b>1174</b> | <b>1.04 (0.96, 1.13)</b>         | <b>0.324</b> |                     |
| Original  | SUPPORT        | 185 (30.2)                     | 612         | 171 (27.5)                      | 622         | 1.10 (0.92, 1.32)                | 0.278        | 0.221               |
| software  | COT            | 140 (50.9)                     | 275         | 138 (52.3)                      | 264         | 0.96 (0.82, 1.11)                | 0.573        |                     |
|           | BOOST NZ       | 65 (38.9)                      | 167         | 76 (45.2)                       | 168         | 0.87 (0.68, 1.11)                | 0.264        |                     |
|           | BOOST II UK    | 60 (56.1)                      | 107         | 56 (50.5)                       | 111         | 1.12 (0.86, 1.45)                | 0.387        |                     |
|           | BOOST II AUS   | 145 (43.3)                     | 335         | 133 (39.2)                      | 339         | 1.09 (0.92, 1.29)                | 0.344        |                     |
|           | <b>NeOProM</b> | <b>595 (39.8)</b>              | <b>1496</b> | <b>574 (38.2)</b>               | <b>1504</b> | <b>1.03 (0.95, 1.12)</b>         | <b>0.506</b> |                     |
| Revised   | SUPPORT        |                                | .           |                                 | .           |                                  | .            |                     |
| software  | COT            | 143 (52.6)                     | 272         | 124 (46.6)                      | 266         | 1.08 (0.92, 1.27)                | 0.338        |                     |
|           | BOOST NZ       |                                | .           |                                 | .           |                                  | .            |                     |
|           | BOOST II UK    | 185 (50.5)                     | 366         | 164 (45.9)                      | 357         | 1.11 (0.96, 1.28)                | 0.175        |                     |
|           | BOOST II AUS   | 102 (47.7)                     | 214         | 84 (40.8)                       | 206         | 1.16 (0.94, 1.43)                | 0.158        |                     |
|           | <b>NeOProM</b> | <b>430 (50.5)</b>              | <b>852</b>  | <b>372 (44.9)</b>               | <b>829</b>  | <b>1.11 (1.01, 1.23)</b>         | <b>0.029</b> |                     |
| SGA:      | SUPPORT        | 156 (27.3)                     | 572         | 146 (25.7)                      | 568         | 1.07 (0.87, 1.30)                | 0.527        | 0.679               |
| Trialist  | COT            | 265 (50.6)                     | 524         | 251 (48.3)                      | 520         | 1.02 (0.91, 1.15)                | 0.719        |                     |
| defined - | BOOST II NZ    | 56 (37.3)                      | 150         | 68 (43.9)                       | 155         | 0.86 (0.66, 1.11)                | 0.234        |                     |
| No        | BOOST II UK    | 204 (51.4)                     | 397         | 182 (46.0)                      | 396         | 1.14 (0.99, 1.30)                | 0.069        |                     |
|           | BOOST II AUS   | 198 (42.2)                     | 469         | 182 (38.6)                      | 471         | 1.09 (0.94, 1.26)                | 0.260        |                     |
|           | <b>NeOProM</b> | <b>879 (41.6)</b>              | <b>2112</b> | <b>829 (39.3)</b>               | <b>2110</b> | <b>1.06 (0.99, 1.13)</b>         | <b>0.113</b> |                     |
| Yes       | SUPPORT        | 29 (72.5)                      | 40          | 25 (46.3)                       | 54          | 1.54 (1.09, 2.17)                | 0.014        |                     |
|           | COT            | 33 (61.1)                      | 54          | 32 (65.3)                       | 49          | 0.94 (0.70, 1.26)                | 0.679        |                     |
|           | BOOST II NZ    | 9 (52.9)                       | 17          | 8 (61.5)                        | 13          | 0.79 (0.44, 1.45)                | 0.452        |                     |
|           | BOOST II UK    | 40 (54.1)                      | 74          | 35 (50.7)                       | 69          | 3.04 (0.48, 19.0)                | 0.236        |                     |
|           | BOOST II AUS   | 48 (60.8)                      | 79          | 35 (47.3)                       | 74          | 1.27 (0.96, 1.68)                | 0.099        |                     |
|           | <b>NeOProM</b> | <b>159 (60.2)</b>              | <b>264</b>  | <b>135 (52.1)</b>               | <b>259</b>  | <b>1.16 (0.99, 1.34)</b>         | <b>0.060</b> |                     |
| SGA:      | SUPPORT        | 145 (27.8)                     | 522         | 124 (24.4)                      | 509         | 1.15 (0.93, 1.42)                | 0.196        | 0.819               |
| NeOProM   | COT            | 265 (50.6)                     | 524         | 251 (48.3)                      | 520         | 1.02 (0.91, 1.15)                | 0.719        |                     |
| defined - | BOOST II NZ    | 56 (37.3)                      | 150         | 68 (43.9)                       | 155         | 0.86 (0.66, 1.11)                | 0.234        |                     |
| No        | BOOST II UK    | 214 (51.4)                     | 416         | 191 (46.0)                      | 415         | 1.12 (0.98, 1.29)                | 0.093        |                     |
|           | BOOST II AUS   | 198 (42.2)                     | 469         | 182 (38.6)                      | 471         | 1.09 (0.94, 1.26)                | 0.260        |                     |
|           | <b>NeOProM</b> | <b>878 (42.2)</b>              | <b>2081</b> | <b>816 (39.4)</b>               | <b>2070</b> | <b>1.06 (0.99, 1.14)</b>         | <b>0.077</b> |                     |
| Yes       | SUPPORT        | 40 (44.4)                      | 90          | 47 (41.6)                       | 113         | 1.07 (0.78, 1.48)                | 0.657        |                     |
|           | COT            | 33 (61.1)                      | 54          | 32 (65.3)                       | 49          | 0.94 (0.70, 1.26)                | 0.679        |                     |
|           | BOOST II NZ    | 9 (52.9)                       | 17          | 8 (61.5)                        | 13          | 0.79 (0.44, 1.45)                | 0.452        |                     |
|           | BOOST II UK    | 31 (54.4)                      | 57          | 29 (54.7)                       | 53          | 1.00 (0.71, 1.41)                | 0.990        |                     |
|           | BOOST II AUS   | 48 (60.8)                      | 79          | 35 (47.3)                       | 74          | 1.27 (0.96, 1.68)                | 0.099        |                     |
|           | <b>NeOProM</b> | <b>161 (54.2)</b>              | <b>297</b>  | <b>151 (50.0)</b>               | <b>302</b>  | <b>1.04 (0.89, 1.21)</b>         | <b>0.597</b> |                     |

~ **Trialist defined analysis:** primary outcome as defined by trialists - includes alternative measures of disability as described in 'supportive analysis of primary outcome'

\*Analysis adjusted for trial and multiple births

### **Abbreviations/definitions**

CI: confidence interval; RR: relative risk; GA: gestational age; SUPPORT: Surfactant Positive Airway Pressure and Pulse Oximetry Trial; COT: Canadian Oxygen Trial; BOOST: Benefits of Oxygen Saturation Targeting; NZ: New Zealand; UK: United Kingdom; AUS: Australia; NeOProM: Neonatal Oxygenation Prospective Meta-analysis; inborn: born inside the treating center; outborn: born outside the treating center (e.g. transferred from another hospital); vaginal: mode of delivery through the vagina; Caesarean: mode of delivery via surgical procedure; ANS: antenatal corticosteroids; singleton: child born as a single birth; multiple: more than one child per birth; start<6 hrs: intervention commenced less than 6 hours after birth; start>=6 hrs: intervention commenced greater than or equal to 6 hours after birth; original software: original oximeter software; revised software: revised oximeter software; SGA: small for gestational age; SGA NeOProM defined: small for gestational age as per definition used by NeOProM collaboration, i.e. less than 10th percentile using charts from Kramer et al.<sup>1</sup>

The subgroup analysis by oximeter software type (original vs revised) excludes n=74 infants in COT who were exposed to both the original and revised software.

Empty cells (.) indicate data not collected or not applicable in this trial.

\*\*\* Low / no event rate(s) makes parameter not estimable.

eTable 8. Major disability (primary analysis)^, by subgroups

|           |                | Lower Oxygen Saturation Target |             | Higher Oxygen Saturation Target |             | Adjusted* Relative Risk (95% CI) |              |                     |
|-----------|----------------|--------------------------------|-------------|---------------------------------|-------------|----------------------------------|--------------|---------------------|
| Subgroup  | Trial          | n (%)                          | N           | n (%)                           | N           | Adjusted RR                      | p-value      | interaction p-value |
| GA<26 wks | SUPPORT        | 87 (51.2)                      | 170         | 118 (59.6)                      | 198         | 0.86 (0.71, 1.04)                | 0.119        | 0.252               |
|           | COT            | 87 (46.5)                      | 187         | 84 (45.9)                       | 183         | 1.00 (0.81, 1.22)                | 0.978        |                     |
|           | BOOST NZ       | 14 (34.1)                      | 41          | 17 (37.0)                       | 46          | 1.21 (0.69, 2.13)                | 0.500        |                     |
|           | BOOST II UK    | 44 (47.3)                      | 93          | 51 (49.0)                       | 104         | 0.96 (0.72, 1.29)                | 0.797        |                     |
|           | BOOST II AUS   | 60 (39.0)                      | 154         | 60 (35.9)                       | 167         | 1.05 (0.80, 1.37)                | 0.718        |                     |
|           | <b>NeOProM</b> | <b>292 (45.3)</b>              | <b>645</b>  | <b>330 (47.3)</b>               | <b>698</b>  | <b>0.96 (0.85, 1.07)</b>         | <b>0.430</b> |                     |
| GA≥26 wks | SUPPORT        | 136 (44.9)                     | 303         | 138 (44.8)                      | 308         | 1.01 (0.84, 1.22)                | 0.889        |                     |
|           | COT            | 114 (38.9)                     | 293         | 110 (37.0)                      | 297         | 1.01 (0.84, 1.23)                | 0.890        |                     |
|           | BOOST NZ       | 23 (29.9)                      | 77          | 27 (37.5)                       | 72          | 0.75 (0.48, 1.17)                | 0.207        |                     |
|           | BOOST II UK    | 65 (37.6)                      | 173         | 62 (33.9)                       | 183         | 1.15 (0.89, 1.50)                | 0.279        |                     |
|           | BOOST II AUS   | 77 (30.4)                      | 253         | 65 (25.6)                       | 254         | 1.21 (0.92, 1.58)                | 0.174        |                     |
|           | <b>NeOProM</b> | <b>415 (37.8)</b>              | <b>1099</b> | <b>402 (36.1)</b>               | <b>1114</b> | <b>1.04 (0.94, 1.16)</b>         | <b>0.425</b> |                     |
| Inborn    | SUPPORT        | 223 (47.1)                     | 473         | 256 (50.6)                      | 506         | 0.94 (0.82, 1.07)                | 0.340        | 0.501               |
|           | COT            | 186 (41.7)                     | 446         | 179 (40.8)                      | 439         | 1.00 (0.86, 1.15)                | 0.956        |                     |
|           | BOOST NZ       | 35 (31.5)                      | 111         | 43 (38.1)                       | 113         | 0.83 (0.58, 1.19)                | 0.320        |                     |
|           | BOOST II UK    | 98 (41.2)                      | 238         | 99 (39.1)                       | 253         | 1.08 (0.88, 1.32)                | 0.479        |                     |
|           | BOOST II AUS   | 129 (34.1)                     | 378         | 120 (30.0)                      | 400         | 1.12 (0.93, 1.36)                | 0.240        |                     |
|           | <b>NeOProM</b> | <b>671 (40.8)</b>              | <b>1646</b> | <b>697 (40.7)</b>               | <b>1711</b> | <b>1.00 (0.92, 1.08)</b>         | <b>0.926</b> |                     |
| Outborn   | SUPPORT        | .                              | .           | .                               | .           | .                                | .            |                     |
|           | COT            | 15 (44.1)                      | 34          | 15 (36.6)                       | 41          | 1.21 (0.69, 2.10)                | 0.474        |                     |
|           | BOOST NZ       | 2 (28.6)                       | 7           | 1 (20.0)                        | 5           | 1.43 (0.17, 11.8)                | 0.740        |                     |
|           | BOOST II UK    | 11 (39.3)                      | 28          | 14 (41.2)                       | 34          | 0.98 (0.50, 1.90)                | 0.942        |                     |
|           | BOOST II AUS   | 8 (27.6)                       | 29          | 5 (23.8)                        | 21          | 1.03 (0.39, 2.71)                | 0.950        |                     |
|           | <b>NeOProM</b> | <b>36 (36.7)</b>               | <b>98</b>   | <b>35 (34.7)</b>                | <b>101</b>  | <b>1.14 (0.79, 1.65)</b>         | <b>0.476</b> |                     |
| Vaginal   | SUPPORT        | 59 (40.4)                      | 146         | 79 (45.4)                       | 174         | 0.88 (0.68, 1.14)                | 0.347        | 0.499               |
|           | COT            | 84 (47.2)                      | 178         | 72 (37.3)                       | 193         | 1.26 (1.00, 1.60)                | 0.051        |                     |
|           | BOOST NZ       | 14 (28.6)                      | 49          | 20 (37.0)                       | 54          | 1.71 (0.70, 4.19)                | 0.241        |                     |
|           | BOOST II UK    | 63 (40.4)                      | 156         | 67 (40.4)                       | 166         | 1.01 (0.78, 1.32)                | 0.913        |                     |
|           | BOOST II AUS   | 63 (33.3)                      | 189         | 59 (31.6)                       | 187         | 1.04 (0.78, 1.38)                | 0.813        |                     |
|           | <b>NeOProM</b> | <b>283 (39.4)</b>              | <b>718</b>  | <b>297 (38.4)</b>               | <b>774</b>  | <b>1.04 (0.92, 1.18)</b>         | <b>0.551</b> |                     |
| Caesarean | SUPPORT        | 164 (50.2)                     | 327         | 177 (53.3)                      | 332         | 0.95 (0.81, 1.10)                | 0.494        |                     |
|           | COT            | 117 (38.7)                     | 302         | 121 (42.3)                      | 286         | 0.89 (0.75, 1.05)                | 0.178        |                     |
|           | BOOST NZ       | 23 (33.3)                      | 69          | 24 (37.5)                       | 64          | 0.88 (0.56, 1.39)                | 0.577        |                     |
|           | BOOST II UK    | 46 (41.8)                      | 110         | 46 (38.0)                       | 121         | 1.13 (0.84, 1.51)                | 0.433        |                     |
|           | BOOST II AUS   | 73 (33.6)                      | 217         | 65 (28.0)                       | 232         | 1.20 (0.93, 1.56)                | 0.156        |                     |
|           | <b>NeOProM</b> | <b>423 (41.3)</b>              | <b>1025</b> | <b>433 (41.8)</b>               | <b>1035</b> | <b>0.98 (0.89, 1.08)</b>         | <b>0.691</b> |                     |
| ANS - No  | SUPPORT        | 7 (41.2)                       | 17          | 12 (50.0)                       | 24          | 0.79 (0.39, 1.58)                | 0.500        | 0.586               |
|           | COT            | 25 (54.3)                      | 46          | 26 (61.9)                       | 42          | 0.67 (0.32, 1.44)                | 0.309        |                     |
|           | BOOST NZ       | 5 (38.5)                       | 13          | 4 (40.0)                        | 10          | 1.00 (0.91, 1.11)                | 0.959        |                     |
|           | BOOST II UK    | 8 (40.0)                       | 20          | 9 (45.0)                        | 20          | 0.89 (0.43, 1.83)                | 0.997        |                     |

eTable 8. Major disability (primary analysis)^, by subgroups (continued)

|             |                | Lower Oxygen Saturation Target |             | Higher Oxygen Saturation Target |             | Adjusted* Relative Risk (95% CI) |              |                     |
|-------------|----------------|--------------------------------|-------------|---------------------------------|-------------|----------------------------------|--------------|---------------------|
| Subgroup    | Trial          | n (%)                          | N           | n (%)                           | N           | Adjusted RR                      | p-value      | interaction p-value |
|             | BOOST II AUS   | 13 (32.5)                      | 40          | 8 (29.6)                        | 27          | 1.05 (0.50, 2.23)                | 0.889        |                     |
|             | <b>NeOProM</b> | <b>58 (42.6)</b>               | <b>136</b>  | <b>59 (48.0)</b>                | <b>123</b>  | <b>0.96 (0.70, 1.32)</b>         | <b>0.814</b> |                     |
| ANS - Yes   | SUPPORT        | 216 (47.4)                     | 456         | 244 (50.6)                      | 482         | 0.94 (0.83, 1.08)                | 0.412        |                     |
|             | COT            | 175 (40.4)                     | 433         | 168 (38.4)                      | 438         | 1.02 (0.88, 1.19)                | 0.755        |                     |
|             | BOOST NZ       | 32 (30.5)                      | 105         | 40 (37.0)                       | 108         | 0.83 (0.56, 1.21)                | 0.327        |                     |
|             | BOOST II UK    | 101 (41.2)                     | 245         | 103 (38.9)                      | 265         | 1.08 (0.88, 1.33)                | 0.476        |                     |
|             | BOOST II AUS   | 122 (33.4)                     | 365         | 117 (30.0)                      | 390         | 1.09 (0.90, 1.33)                | 0.379        |                     |
|             | <b>NeOProM</b> | <b>646 (40.3)</b>              | <b>1604</b> | <b>672 (39.9)</b>               | <b>1683</b> | <b>1.00 (0.93, 1.09)</b>         | <b>0.919</b> |                     |
| Male        | SUPPORT        | 128 (54.0)                     | 237         | 159 (57.2)                      | 278         | 0.95 (0.80, 1.11)                | 0.497        | 0.338               |
|             | COT            | 134 (50.6)                     | 265         | 116 (47.0)                      | 247         | 1.03 (0.87, 1.22)                | 0.728        |                     |
|             | BOOST NZ       | 25 (41.7)                      | 60          | 31 (50.8)                       | 61          | 0.82 (0.56, 1.20)                | 0.307        |                     |
|             | BOOST II UK    | 63 (46.7)                      | 135         | 65 (43.9)                       | 148         | 1.11 (0.87, 1.43)                | 0.405        |                     |
|             | BOOST II AUS   | 90 (44.6)                      | 202         | 75 (35.5)                       | 211         | 1.28 (1.01, 1.61)                | 0.039        |                     |
|             | <b>NeOProM</b> | <b>440 (48.9)</b>              | <b>899</b>  | <b>446 (47.2)</b>               | <b>945</b>  | <b>1.03 (0.94, 1.13)</b>         | <b>0.521</b> |                     |
| Female      | SUPPORT        | 95 (40.3)                      | 236         | 97 (42.5)                       | 228         | 0.93 (0.75, 1.17)                | 0.544        |                     |
|             | COT            | 67 (31.2)                      | 215         | 78 (33.5)                       | 233         | 0.92 (0.71, 1.20)                | 0.548        |                     |
|             | BOOST NZ       | 12 (20.7)                      | 58          | 13 (22.8)                       | 57          | 0.91 (0.45, 1.82)                | 0.954        |                     |
|             | BOOST II UK    | 46 (35.1)                      | 131         | 48 (34.5)                       | 139         | 1.03 (0.75, 1.40)                | 0.872        |                     |
|             | BOOST II AUS   | 47 (22.9)                      | 205         | 50 (23.8)                       | 210         | 0.96 (0.68, 1.35)                | 0.815        |                     |
|             | <b>NeOProM</b> | <b>267 (31.6)</b>              | <b>845</b>  | <b>286 (33.0)</b>               | <b>867</b>  | <b>0.95 (0.84, 1.09)</b>         | <b>0.479</b> |                     |
| Singleton   | SUPPORT        | 167 (47.6)                     | 351         | 186 (48.9)                      | 380         | 0.97 (0.84, 1.13)                | 0.712        | 0.329               |
|             | COT            | 139 (42.9)                     | 324         | 128 (38.7)                      | 331         | 1.11 (0.92, 1.33)                | 0.271        |                     |
|             | BOOST NZ       | 25 (29.1)                      | 86          | 32 (35.6)                       | 90          | 0.82 (0.53, 1.26)                | 0.361        |                     |
|             | BOOST II UK    | 69 (38.5)                      | 179         | 78 (38.4)                       | 203         | 1.00 (0.78, 1.29)                | 0.980        |                     |
|             | BOOST II AUS   | 102 (33.6)                     | 304         | 95 (29.5)                       | 322         | 1.14 (0.90, 1.43)                | 0.276        |                     |
|             | <b>NeOProM</b> | <b>502 (40.4)</b>              | <b>1244</b> | <b>519 (39.1)</b>               | <b>1326</b> | <b>1.03 (0.94, 1.13)</b>         | <b>0.563</b> |                     |
| Multiple    | SUPPORT        | 56 (45.9)                      | 122         | 70 (55.6)                       | 126         | 0.81 (0.61, 1.08)                | 0.159        |                     |
|             | COT            | 62 (39.7)                      | 156         | 66 (44.3)                       | 149         | 0.87 (0.71, 1.07)                | 0.200        |                     |
|             | BOOST NZ       | 12 (37.5)                      | 32          | 12 (42.9)                       | 28          | 0.90 (0.51, 1.58)                | 0.703        |                     |
|             | BOOST II UK    | 40 (46.0)                      | 87          | 35 (41.7)                       | 84          | 1.15 (0.85, 1.56)                | 0.352        |                     |
|             | BOOST II AUS   | 35 (34.0)                      | 103         | 30 (30.3)                       | 99          | 1.11 (0.80, 1.56)                | 0.531        |                     |
|             | <b>NeOProM</b> | <b>205 (41.0)</b>              | <b>500</b>  | <b>213 (43.8)</b>               | <b>486</b>  | <b>0.95 (0.83, 1.08)</b>         | <b>0.443</b> |                     |
| start<6 hrs | SUPPORT        | 218 (47.2)                     | 462         | 252 (50.8)                      | 496         | 0.94 (0.82, 1.07)                | 0.331        | 0.193               |
|             | COT            | 6 (27.3)                       | 22          | 10 (47.6)                       | 21          | 0.57 (0.25, 1.32)                | 0.191        |                     |
|             | BOOST NZ       | 13 (59.1)                      | 22          | 8 (38.1)                        | 21          | 1.87 (0.72, 4.85)                | 0.197        |                     |
|             | BOOST II UK    |                                | .           |                                 | .           |                                  | .            |                     |
|             | BOOST II AUS   | 13 (33.3)                      | 39          | 17 (34.7)                       | 49          | 0.93 (0.51, 1.69)                | 0.807        |                     |
|             | <b>NeOProM</b> | <b>250 (45.9)</b>              | <b>545</b>  | <b>287 (48.9)</b>               | <b>587</b>  | <b>0.94 (0.83, 1.06)</b>         | <b>0.320</b> |                     |
| >=6 hrs     | SUPPORT        | 2 (40.0)                       | 5           | 0                               | 4           |                                  | ***          |                     |
|             | COT            | 195 (42.6)                     | 458         | 184 (40.1)                      | 459         | 1.03 (0.90, 1.19)                | 0.661        |                     |
|             | BOOST NZ       | 24 (25.0)                      | 96          | 36 (37.1)                       | 97          | 0.68 (0.44, 1.04)                | 0.073        |                     |

eTable 8. Major disability (primary analysis)^, by subgroups (continued)

|           |                | Lower Oxygen Saturation Target |             | Higher Oxygen Saturation Target |             | Adjusted* Relative Risk (95% CI) |              |                     |
|-----------|----------------|--------------------------------|-------------|---------------------------------|-------------|----------------------------------|--------------|---------------------|
| Subgroup  | Trial          | n (%)                          | N           | n (%)                           | N           | Adjusted RR                      | p-value      | interaction p-value |
|           | BOOST II UK    |                                | .           |                                 | .           |                                  | .            |                     |
|           | BOOST II AUS   | 124 (33.8)                     | 367         | 108 (29.0)                      | 372         | 1.17 (0.96, 1.44)                | 0.120        |                     |
|           | <b>NeOProM</b> | <b>345 (37.3)</b>              | <b>926</b>  | <b>328 (35.2)</b>               | <b>932</b>  | <b>1.05 (0.93, 1.17)</b>         | <b>0.437</b> |                     |
| Original  | SUPPORT        | 223 (47.1)                     | 473         | 256 (50.6)                      | 506         | 0.94 (0.82, 1.07)                | 0.340        | 0.299               |
| software  | COT            | 91 (40.3)                      | 226         | 90 (41.7)                       | 216         | 0.94 (0.76, 1.16)                | 0.574        |                     |
|           | BOOST NZ       | 37 (31.4)                      | 118         | 44 (37.3)                       | 118         | 0.85 (0.59, 1.20)                | 0.350        |                     |
|           | BOOST II UK    | 33 (54.1)                      | 61          | 24 (38.1)                       | 63          | 1.45 (0.97, 2.19)                | 0.073        |                     |
|           | BOOST II AUS   | 81 (32.0)                      | 253         | 75 (28.6)                       | 262         | 1.10 (0.86, 1.41)                | 0.459        |                     |
|           | <b>NeOProM</b> | <b>465 (41.1)</b>              | <b>1131</b> | <b>489 (42.0)</b>               | <b>1165</b> | <b>0.98 (0.89, 1.08)</b>         | <b>0.673</b> |                     |
| Revised   | SUPPORT        |                                | .           |                                 | .           |                                  | .            |                     |
| software  | COT            | 97 (43.1)                      | 225         | 85 (37.4)                       | 227         | 1.10 (0.89, 1.36)                | 0.357        |                     |
|           | BOOST NZ       |                                | .           |                                 | .           |                                  | .            |                     |
|           | BOOST II UK    | 76 (37.1)                      | 205         | 89 (39.7)                       | 224         | 0.95 (0.76, 1.19)                | 0.684        |                     |
|           | BOOST II AUS   | 56 (36.4)                      | 154         | 50 (31.4)                       | 159         | 1.19 (0.88, 1.61)                | 0.264        |                     |
|           | <b>NeOProM</b> | <b>229 (39.2)</b>              | <b>584</b>  | <b>224 (36.7)</b>               | <b>610</b>  | <b>1.06 (0.93, 1.22)</b>         | <b>0.368</b> |                     |
| SGA:      | SUPPORT        | 214 (46.8)                     | 457         | 231 (49.4)                      | 468         | 0.95 (0.83, 1.09)                | 0.452        | 0.896               |
| Trialist  | COT            | 182 (41.3)                     | 441         | 176 (39.6)                      | 445         | 1.01 (0.87, 1.18)                | 0.851        |                     |
| defined - | BOOST II NZ    | 29 (28.2)                      | 103         | 41 (37.3)                       | 110         | 0.76 (0.53, 1.09)                | 0.137        |                     |
| No        | BOOST II UK    | 94 (41.4)                      | 227         | 96 (38.9)                       | 247         | 1.09 (0.89, 1.35)                | 0.405        |                     |
|           | BOOST II AUS   | 114 (32.0)                     | 356         | 104 (28.7)                      | 362         | 1.12 (0.91, 1.38)                | 0.281        |                     |
|           | <b>NeOProM</b> | <b>633 (40.0)</b>              | <b>1584</b> | <b>648 (39.7)</b>               | <b>1632</b> | <b>1.00 (0.92, 1.09)</b>         | <b>0.950</b> |                     |
| Yes       | SUPPORT        | 9 (56.3)                       | 16          | 25 (65.8)                       | 38          | 0.86 (0.53, 1.41)                | 0.558        |                     |
|           | COT            | 19 (48.7)                      | 39          | 18 (51.4)                       | 35          | 0.95 (0.60, 1.49)                | 0.811        |                     |
|           | BOOST II NZ    | 8 (53.3)                       | 15          | 3 (37.5)                        | 8           | 1.28 (0.47, 3.47)                | 0.626        |                     |
|           | BOOST II UK    | 15 (39.5)                      | 38          | 16 (41.0)                       | 39          | 1.15 (0.78, 1.71)                | 0.479        |                     |
|           | BOOST II AUS   | 23 (45.1)                      | 51          | 21 (35.6)                       | 59          | 1.27 (0.80, 2.00)                | 0.311        |                     |
|           | <b>NeOProM</b> | <b>74 (46.5)</b>               | <b>159</b>  | <b>83 (46.4)</b>                | <b>179</b>  | <b>1.02 (0.81, 1.28)</b>         | <b>0.877</b> |                     |
| SGA:      | SUPPORT        | 189 (45.8)                     | 413         | 207 (48.5)                      | 427         | 0.95 (0.81, 1.10)                | 0.455        | 0.999               |
| NeOProM   | COT            | 182 (41.3)                     | 441         | 176 (39.6)                      | 445         | 1.01 (0.87, 1.18)                | 0.851        |                     |
| defined - | BOOST II NZ    | 29 (28.2)                      | 103         | 41 (37.3)                       | 110         | 0.76 (0.53, 1.09)                | 0.137        |                     |
| No        | BOOST II UK    | 99 (41.4)                      | 239         | 103 (39.5)                      | 261         | 1.08 (0.88, 1.32)                | 0.482        |                     |
|           | BOOST II AUS   | 114 (32.0)                     | 356         | 104 (28.7)                      | 362         | 1.12 (0.91, 1.38)                | 0.281        |                     |
|           | <b>NeOProM</b> | <b>613 (39.5)</b>              | <b>1552</b> | <b>631 (39.3)</b>               | <b>1605</b> | <b>1.00 (0.92, 1.09)</b>         | <b>0.974</b> |                     |
| Yes       | SUPPORT        | 34 (56.7)                      | 60          | 49 (62.0)                       | 79          | 0.91 (0.68, 1.22)                | 0.538        |                     |
|           | COT            | 19 (48.7)                      | 39          | 18 (51.4)                       | 35          | 0.95 (0.60, 1.49)                | 0.811        |                     |
|           | BOOST II NZ    | 8 (53.3)                       | 15          | 3 (37.5)                        | 8           | 1.28 (0.47, 3.47)                | 0.626        |                     |
|           | BOOST II UK    | 10 (37.0)                      | 27          | 10 (38.5)                       | 26          | 1.21 (0.73, 2.02)                | 0.455        |                     |
|           | BOOST II AUS   | 23 (45.1)                      | 51          | 21 (35.6)                       | 59          | 1.27 (0.80, 2.00)                | 0.311        |                     |
|           | <b>NeOProM</b> | <b>94 (49.0)</b>               | <b>192</b>  | <b>101 (48.8)</b>               | <b>207</b>  | <b>1.02 (0.83, 1.25)</b>         | <b>0.852</b> |                     |

**^ Primary outcome as pre-specified in published NeOProM protocol:** composite outcome of death or major disability by 18-24 months' age, corrected for prematurity. Major disability is any of the following: Bayley-III Developmental Assessment cognitive score <85 and/or language score <85; severe visual loss; cerebral palsy with Gross Motor Function Classification System (GMFCS) level 2 or higher at 18-24 months' age, corrected for prematurity; or deafness requiring hearing aids.

\*Analysis adjusted for trial and multiple births

#### **Abbreviations/definitions**

CI: confidence interval; RR: relative risk; GA: gestational age; SUPPORT: Surfactant Positive Airway Pressure and Pulse Oximetry Trial; COT: Canadian Oxygen Trial; BOOST: Benefits of Oxygen Saturation Targeting; NZ: New Zealand; UK: United Kingdom; AUS: Australia; NeOProM: Neonatal Oxygenation Prospective Meta-analysis; inborn: born inside the treating center; outborn: born outside the treating center (e.g. transferred from another hospital); vaginal: mode of delivery through the vagina; Caesarean: mode of delivery via surgical procedure; ANS: antenatal corticosteroids; singleton: child born as a single birth; multiple: more than one child per birth; start<6 hrs: intervention commenced less than 6 hours after birth; start>=6 hrs: intervention commenced greater than or equal to 6 hours after birth; original software: original oximeter software; revised software: revised oximeter software; SGA: small for gestational age; SGA NeOProM defined: small for gestational age as per definition used by NeOProM collaboration, i.e. less than 10th percentile using charts from Kramer et al.<sup>1</sup>

The subgroup analysis by oximeter software type (original vs revised) excludes n=74 infants in COT who were exposed to both the original and revised software.

Empty cells (.) indicate data not collected or not applicable in this trial.

\*\*\* Low / no event rate(s) makes parameter not estimable.

**eTable 9. Major disability (supportive analysis)<sup>#</sup>, by subgroups**

|           |                | Lower Oxygen Saturation Target |             | Higher Oxygen Saturation Target |             | Adjusted* Relative Risk (95% CI) |              |                     |
|-----------|----------------|--------------------------------|-------------|---------------------------------|-------------|----------------------------------|--------------|---------------------|
| Subgroup  | Trial          | n (%)                          | N           | n (%)                           | N           | Adjusted RR                      | p-value      | interaction p-value |
| GA<26 wks | SUPPORT        | 87 (51.2)                      | 170         | 118 (59.6)                      | 198         | 0.86 (0.71, 1.04)                | 0.119        | 0.363               |
|           | COT            | 87 (46.5)                      | 187         | 84 (45.9)                       | 183         | 1.00 (0.81, 1.22)                | 0.978        |                     |
|           | BOOST NZ       | 17 (33.3)                      | 51          | 19 (33.3)                       | 57          | 1.55 (0.84, 2.86)                | 0.165        |                     |
|           | BOOST II UK    | 51 (41.5)                      | 123         | 57 (39.3)                       | 145         | 1.06 (0.79, 1.42)                | 0.702        |                     |
|           | BOOST II AUS   | 63 (38.0)                      | 166         | 63 (36.0)                       | 175         | 1.04 (0.80, 1.35)                | 0.769        |                     |
|           | <b>NeOProM</b> | <b>305 (43.8)</b>              | <b>697</b>  | <b>341 (45.0)</b>               | <b>758</b>  | <b>0.97 (0.87, 1.08)</b>         | <b>0.598</b> |                     |
| GA≥26 wks | SUPPORT        | 137 (45.1)                     | 304         | 138 (44.8)                      | 308         | 1.02 (0.85, 1.22)                | 0.857        |                     |
|           | COT            | 114 (38.8)                     | 294         | 111 (37.2)                      | 298         | 1.01 (0.83, 1.22)                | 0.954        |                     |
|           | BOOST NZ       | 23 (25.3)                      | 91          | 29 (34.5)                       | 84          | 0.68 (0.43, 1.06)                | 0.086        |                     |
|           | BOOST II UK    | 72 (31.6)                      | 228         | 65 (28.9)                       | 225         | 1.15 (0.88, 1.50)                | 0.300        |                     |
|           | BOOST II AUS   | 83 (29.7)                      | 279         | 67 (24.1)                       | 278         | 1.25 (0.96, 1.62)                | 0.104        |                     |
|           | <b>NeOProM</b> | <b>429 (35.9)</b>              | <b>1196</b> | <b>410 (34.4)</b>               | <b>1193</b> | <b>1.04 (0.94, 1.15)</b>         | <b>0.462</b> |                     |
| Inborn    | SUPPORT        | 224 (47.3)                     | 474         | 256 (50.6)                      | 506         | 0.94 (0.82, 1.07)                | 0.357        | 0.304               |
|           | COT            | 186 (41.6)                     | 447         | 179 (40.8)                      | 439         | 0.99 (0.86, 1.15)                | 0.935        |                     |
|           | BOOST NZ       | 38 (28.6)                      | 133         | 47 (35.6)                       | 132         | 0.81 (0.58, 1.14)                | 0.231        |                     |
|           | BOOST II UK    | 110 (35.4)                     | 311         | 108 (33.1)                      | 326         | 1.10 (0.89, 1.35)                | 0.378        |                     |
|           | BOOST II AUS   | 136 (33.0)                     | 412         | 125 (29.3)                      | 427         | 1.12 (0.93, 1.36)                | 0.243        |                     |
|           | <b>NeOProM</b> | <b>694 (39.1)</b>              | <b>1777</b> | <b>715 (39.1)</b>               | <b>1830</b> | <b>1.00 (0.92, 1.08)</b>         | <b>0.931</b> |                     |
| Outborn   | SUPPORT        |                                | .           |                                 | .           |                                  | .            |                     |
|           | COT            | 15 (44.1)                      | 34          | 16 (38.1)                       | 42          | 1.16 (0.67, 1.99)                | 0.556        |                     |
|           | BOOST NZ       | 2 (22.2)                       | 9           | 1 (11.1)                        | 9           | 1.95 (0.21, 18.2)                | 0.556        |                     |
|           | BOOST II UK    | 13 (32.5)                      | 40          | 14 (31.8)                       | 44          | 1.06 (0.54, 2.10)                | 0.863        |                     |
|           | BOOST II AUS   | 10 (30.3)                      | 33          | 5 (19.2)                        | 26          | 1.55 (0.60, 4.03)                | 0.367        |                     |
|           | <b>NeOProM</b> | <b>40 (34.5)</b>               | <b>116</b>  | <b>36 (29.8)</b>                | <b>121</b>  | <b>1.21 (0.85, 1.72)</b>         | <b>0.301</b> |                     |
| Vaginal   | SUPPORT        | 59 (40.4)                      | 146         | 79 (45.4)                       | 174         | 0.88 (0.68, 1.14)                | 0.347        | 0.351               |
|           | COT            | 84 (47.2)                      | 178         | 73 (37.6)                       | 194         | 1.25 (0.99, 1.58)                | 0.059        |                     |
|           | BOOST NZ       | 16 (26.7)                      | 60          | 22 (34.4)                       | 64          | 1.57 (0.66, 3.75)                | 0.311        |                     |
|           | BOOST II UK    | 69 (34.8)                      | 198         | 72 (33.0)                       | 218         | 1.07 (0.82, 1.40)                | 0.607        |                     |
|           | BOOST II AUS   | 69 (33.0)                      | 209         | 62 (30.8)                       | 201         | 1.06 (0.80, 1.41)                | 0.677        |                     |
|           | <b>NeOProM</b> | <b>297 (37.5)</b>              | <b>791</b>  | <b>308 (36.2)</b>               | <b>851</b>  | <b>1.05 (0.93, 1.19)</b>         | <b>0.418</b> |                     |
| Caesarean | SUPPORT        | 165 (50.3)                     | 328         | 177 (53.3)                      | 332         | 0.95 (0.82, 1.11)                | 0.518        |                     |
|           | COT            | 117 (38.6)                     | 303         | 121 (42.3)                      | 286         | 0.89 (0.75, 1.05)                | 0.168        |                     |
|           | BOOST NZ       | 24 (29.3)                      | 82          | 26 (33.8)                       | 77          | 0.85 (0.55, 1.32)                | 0.483        |                     |
|           | BOOST II UK    | 54 (35.3)                      | 153         | 50 (32.9)                       | 152         | 1.11 (0.83, 1.48)                | 0.495        |                     |
|           | BOOST II AUS   | 75 (32.1)                      | 234         | 67 (26.9)                       | 249         | 1.19 (0.93, 1.54)                | 0.169        |                     |
|           | <b>NeOProM</b> | <b>435 (39.5)</b>              | <b>1100</b> | <b>441 (40.2)</b>               | <b>1096</b> | <b>0.98 (0.89, 1.07)</b>         | <b>0.615</b> |                     |
| ANS - No  | SUPPORT        | 7 (41.2)                       | 17          | 12 (50.0)                       | 24          | 0.79 (0.39, 1.58)                | 0.500        | 0.546               |
|           | COT            | 25 (54.3)                      | 46          | 27 (62.8)                       | 43          | 0.68 (0.32, 1.44)                | 0.313        |                     |
|           | BOOST NZ       | 5 (31.3)                       | 16          | 4 (33.3)                        | 12          | 0.94 (0.32, 2.76)                | 0.943        |                     |
|           | BOOST II UK    | 8 (33.3)                       | 24          | 10 (37.0)                       | 27          | 1.01 (0.64, 1.61)                | 0.955        |                     |

eTable 9. Major disability (supportive analysis)<sup>#</sup>, by subgroups (continued)

|             |                | Lower Oxygen Saturation Target |             | Higher Oxygen Saturation Target |             | Adjusted* Relative Risk (95% CI) |              |                     |
|-------------|----------------|--------------------------------|-------------|---------------------------------|-------------|----------------------------------|--------------|---------------------|
| Subgroup    | Trial          | n (%)                          | N           | n (%)                           | N           | Adjusted RR                      | p-value      | interaction p-value |
|             | BOOST II AUS   | 16 (34.0)                      | 47          | 9 (31.0)                        | 29          | 1.07 (0.54, 2.11)                | 0.845        |                     |
|             | <b>NeOProM</b> | <b>61 (40.7)</b>               | <b>150</b>  | <b>62 (45.9)</b>                | <b>135</b>  | <b>0.92 (0.72, 1.18)</b>         | <b>0.523</b> |                     |
| ANS - Yes   | SUPPORT        | 217 (47.5)                     | 457         | 244 (50.6)                      | 482         | 0.95 (0.83, 1.08)                | 0.430        |                     |
|             | COT            | 175 (40.3)                     | 434         | 168 (38.4)                      | 438         | 1.02 (0.88, 1.19)                | 0.776        |                     |
|             | BOOST NZ       | 35 (27.8)                      | 126         | 44 (34.1)                       | 129         | 0.82 (0.57, 1.17)                | 0.272        |                     |
|             | BOOST II UK    | 115 (35.3)                     | 326         | 111 (32.6)                      | 341         | 1.11 (0.90, 1.36)                | 0.331        |                     |
|             | BOOST II AUS   | 127 (32.2)                     | 395         | 121 (28.9)                      | 419         | 1.10 (0.90, 1.34)                | 0.340        |                     |
|             | <b>NeOProM</b> | <b>669 (38.5)</b>              | <b>1738</b> | <b>688 (38.0)</b>               | <b>1809</b> | <b>1.01 (0.93, 1.09)</b>         | <b>0.858</b> |                     |
| Male        | SUPPORT        | 128 (54.0)                     | 237         | 159 (57.2)                      | 278         | 0.95 (0.80, 1.11)                | 0.497        | 0.333               |
|             | COT            | 134 (50.4)                     | 266         | 117 (47.2)                      | 248         | 1.02 (0.86, 1.21)                | 0.791        |                     |
|             | BOOST NZ       | 27 (38.6)                      | 70          | 33 (42.9)                       | 77          | 0.90 (0.61, 1.32)                | 0.595        |                     |
|             | BOOST II UK    | 72 (39.8)                      | 181         | 72 (36.4)                       | 198         | 1.16 (0.88, 1.52)                | 0.298        |                     |
|             | BOOST II AUS   | 95 (43.4)                      | 219         | 78 (34.2)                       | 228         | 1.29 (1.02, 1.62)                | 0.031        |                     |
|             | <b>NeOProM</b> | <b>456 (46.9)</b>              | <b>973</b>  | <b>459 (44.6)</b>               | <b>1029</b> | <b>1.04 (0.95, 1.14)</b>         | <b>0.421</b> |                     |
| Female      | SUPPORT        | 96 (40.5)                      | 237         | 97 (42.5)                       | 228         | 0.94 (0.75, 1.17)                | 0.582        |                     |
|             | COT            | 67 (31.2)                      | 215         | 78 (33.5)                       | 233         | 0.92 (0.71, 1.20)                | 0.548        |                     |
|             | BOOST NZ       | 13 (18.1)                      | 72          | 15 (23.4)                       | 64          | 0.77 (0.40, 1.49)                | 0.561        |                     |
|             | BOOST II UK    | 51 (30.0)                      | 170         | 50 (29.1)                       | 172         | 1.04 (0.77, 1.41)                | 0.804        |                     |
|             | BOOST II AUS   | 51 (22.6)                      | 226         | 52 (23.1)                       | 225         | 0.97 (0.70, 1.35)                | 0.878        |                     |
|             | <b>NeOProM</b> | <b>278 (30.2)</b>              | <b>920</b>  | <b>292 (31.7)</b>               | <b>922</b>  | <b>0.95 (0.84, 1.09)</b>         | <b>0.471</b> |                     |
| Singleton   | SUPPORT        | 167 (47.6)                     | 351         | 186 (48.9)                      | 380         | 0.97 (0.84, 1.13)                | 0.712        | 0.397               |
|             | COT            | 139 (42.8)                     | 325         | 129 (38.9)                      | 332         | 1.10 (0.92, 1.32)                | 0.308        |                     |
|             | BOOST NZ       | 27 (26.0)                      | 104         | 34 (32.1)                       | 106         | 0.81 (0.53, 1.24)                | 0.331        |                     |
|             | BOOST II UK    | 78 (31.8)                      | 245         | 84 (31.7)                       | 265         | 1.00 (0.78, 1.30)                | 0.973        |                     |
|             | BOOST II AUS   | 109 (32.7)                     | 333         | 99 (28.5)                       | 347         | 1.15 (0.91, 1.44)                | 0.235        |                     |
|             | <b>NeOProM</b> | <b>520 (38.3)</b>              | <b>1358</b> | <b>532 (37.2)</b>               | <b>1430</b> | <b>1.03 (0.94, 1.13)</b>         | <b>0.565</b> |                     |
| Multiple    | SUPPORT        | 57 (46.3)                      | 123         | 70 (55.6)                       | 126         | 0.82 (0.62, 1.09)                | 0.182        |                     |
|             | COT            | 62 (39.7)                      | 156         | 66 (44.3)                       | 149         | 0.87 (0.71, 1.07)                | 0.200        |                     |
|             | BOOST NZ       | 13 (34.2)                      | 38          | 14 (40.0)                       | 35          | 0.87 (0.53, 1.42)                | 0.583        |                     |
|             | BOOST II UK    | 45 (42.5)                      | 106         | 38 (36.2)                       | 105         | 1.21 (0.91, 1.62)                | 0.188        |                     |
|             | BOOST II AUS   | 37 (33.0)                      | 112         | 31 (29.2)                       | 106         | 1.13 (0.81, 1.57)                | 0.462        |                     |
|             | <b>NeOProM</b> | <b>214 (40.0)</b>              | <b>535</b>  | <b>219 (42.0)</b>               | <b>521</b>  | <b>0.96 (0.85, 1.09)</b>         | <b>0.552</b> |                     |
| start<6 hrs | SUPPORT        | 219 (47.3)                     | 463         | 252 (50.8)                      | 496         | 0.94 (0.82, 1.07)                | 0.348        | 0.142               |
|             | COT            | 6 (27.3)                       | 22          | 10 (47.6)                       | 21          | 0.57 (0.25, 1.32)                | 0.191        |                     |
|             | BOOST NZ       | 13 (52.0)                      | 25          | 9 (36.0)                        | 25          | 1.95 (0.65, 5.82)                | 0.232        |                     |
|             | BOOST II UK    |                                | .           |                                 | .           |                                  | .            |                     |
|             | BOOST II AUS   | 13 (29.5)                      | 44          | 18 (35.3)                       | 51          | 0.80 (0.44, 1.46)                | 0.463        |                     |
|             | <b>NeOProM</b> | <b>251 (45.3)</b>              | <b>554</b>  | <b>289 (48.7)</b>               | <b>593</b>  | <b>0.93 (0.82, 1.06)</b>         | <b>0.264</b> |                     |
| >=6 hrs     | SUPPORT        | 2 (40.0)                       | 5           | 0                               | 4           |                                  | ***          |                     |
|             | COT            | 195 (42.5)                     | 459         | 185 (40.2)                      | 460         | 1.03 (0.89, 1.18)                | 0.709        |                     |
|             | BOOST NZ       | 27 (23.1)                      | 117         | 39 (33.6)                       | 116         | 0.69 (0.46, 1.03)                | 0.068        |                     |



**eTable 9. Major disability (supportive analysis)#, by subgroups (continued)**

|           |                | Lower Oxygen Saturation Target |             | Higher Oxygen Saturation Target |             | Adjusted* Relative Risk (95% CI) |              |                     |
|-----------|----------------|--------------------------------|-------------|---------------------------------|-------------|----------------------------------|--------------|---------------------|
| Subgroup  | Trial          | n (%)                          | N           | n (%)                           | N           | Adjusted RR                      | p-value      | interaction p-value |
|           | BOOST II UK    |                                | .           |                                 | .           |                                  | .            |                     |
|           | BOOST II AUS   | 132 (33.2)                     | 398         | 112 (27.9)                      | 402         | 1.20 (0.99, 1.47)                | 0.068        |                     |
|           | <b>NeOProM</b> | <b>356 (36.4)</b>              | <b>979</b>  | <b>336 (34.2)</b>               | <b>982</b>  | <b>1.05 (0.94, 1.17)</b>         | <b>0.376</b> |                     |
| Original  | SUPPORT        | 224 (47.3)                     | 474         | 256 (50.6)                      | 506         | 0.94 (0.82, 1.07)                | 0.357        | 0.286               |
| software  | COT            | 91 (40.3)                      | 226         | 90 (41.7)                       | 216         | 0.94 (0.76, 1.16)                | 0.574        |                     |
|           | BOOST NZ       | 40 (28.2)                      | 142         | 48 (34.0)                       | 141         | 0.83 (0.59, 1.16)                | 0.282        |                     |
|           | BOOST II UK    | 39 (45.3)                      | 86          | 27 (32.9)                       | 82          | 1.43 (0.95, 2.16)                | 0.084        |                     |
|           | BOOST II AUS   | 87 (31.5)                      | 276         | 76 (27.3)                       | 278         | 1.14 (0.89, 1.46)                | 0.296        |                     |
|           | <b>NeOProM</b> | <b>481 (40.0)</b>              | <b>1204</b> | <b>497 (40.6)</b>               | <b>1223</b> | <b>0.98 (0.89, 1.08)</b>         | <b>0.697</b> |                     |
| Revised   | SUPPORT        |                                | .           |                                 | .           |                                  | .            |                     |
| software  | COT            | 97 (42.9)                      | 226         | 86 (37.7)                       | 228         | 1.09 (0.89, 1.35)                | 0.408        |                     |
|           | BOOST NZ       |                                | .           |                                 | .           |                                  | .            |                     |
|           | BOOST II UK    | 84 (31.7)                      | 265         | 95 (33.0)                       | 288         | 0.99 (0.79, 1.24)                | 0.910        |                     |
|           | BOOST II AUS   | 59 (34.9)                      | 169         | 54 (30.9)                       | 175         | 1.16 (0.87, 1.55)                | 0.314        |                     |
|           | <b>NeOProM</b> | <b>240 (36.4)</b>              | <b>660</b>  | <b>235 (34.0)</b>               | <b>691</b>  | <b>1.07 (0.93, 1.22)</b>         | <b>0.332</b> |                     |
| SGA:      | SUPPORT        | 215 (46.9)                     | 458         | 231 (49.4)                      | 468         | 0.95 (0.83, 1.09)                | 0.473        | 0.990               |
| Trialist  | COT            | 182 (41.3)                     | 441         | 177 (39.7)                      | 446         | 1.01 (0.87, 1.17)                | 0.882        |                     |
| defined - | BOOST II NZ    | 32 (25.4)                      | 126         | 44 (33.3)                       | 132         | 0.76 (0.54, 1.07)                | 0.115        |                     |
| No        | BOOST II UK    | 104 (35.0)                     | 297         | 103 (32.5)                      | 317         | 1.11 (0.90, 1.38)                | 0.333        |                     |
|           | BOOST II AUS   | 122 (31.2)                     | 391         | 109 (27.7)                      | 394         | 1.14 (0.93, 1.40)                | 0.215        |                     |
|           | <b>NeOProM</b> | <b>655 (38.2)</b>              | <b>1713</b> | <b>664 (37.8)</b>               | <b>1757</b> | <b>1.01 (0.93, 1.09)</b>         | <b>0.858</b> |                     |
| Yes       | SUPPORT        | 9 (56.3)                       | 16          | 25 (65.8)                       | 38          | 0.86 (0.53, 1.41)                | 0.558        |                     |
|           | COT            | 19 (47.5)                      | 40          | 18 (51.4)                       | 35          | 0.92 (0.58, 1.46)                | 0.726        |                     |
|           | BOOST II NZ    | 8 (50.0)                       | 16          | 4 (44.4)                        | 9           | 1.01 (0.43, 2.36)                | 0.989        |                     |
|           | BOOST II UK    | 19 (35.8)                      | 53          | 18 (34.6)                       | 52          | 1.40 (0.96, 2.04)                | 0.085        |                     |
|           | BOOST II AUS   | 23 (43.4)                      | 53          | 21 (35.6)                       | 59          | 1.22 (0.77, 1.93)                | 0.399        |                     |
|           | <b>NeOProM</b> | <b>78 (43.8)</b>               | <b>178</b>  | <b>86 (44.6)</b>                | <b>193</b>  | <b>1.00 (0.80, 1.26)</b>         | <b>0.984</b> |                     |
| SGA:      | SUPPORT        | 190 (45.9)                     | 414         | 207 (48.5)                      | 427         | 0.95 (0.82, 1.10)                | 0.477        | 0.886               |
| NeOProM   | COT            | 182 (41.3)                     | 441         | 177 (39.7)                      | 446         | 1.01 (0.87, 1.17)                | 0.882        |                     |
| defined - | BOOST II NZ    | 32 (25.4)                      | 126         | 44 (33.3)                       | 132         | 0.76 (0.54, 1.07)                | 0.115        |                     |
| No        | BOOST II UK    | 109 (35.0)                     | 311         | 110 (32.9)                      | 334         | 1.10 (0.89, 1.35)                | 0.382        |                     |
|           | BOOST II AUS   | 122 (31.2)                     | 391         | 109 (27.7)                      | 394         | 1.14 (0.93, 1.40)                | 0.215        |                     |
|           | <b>NeOProM</b> | <b>635 (37.7)</b>              | <b>1683</b> | <b>647 (37.3)</b>               | <b>1733</b> | <b>1.01 (0.93, 1.09)</b>         | <b>0.870</b> |                     |
| Yes       | SUPPORT        | 34 (56.7)                      | 60          | 49 (62.0)                       | 79          | 0.91 (0.68, 1.22)                | 0.538        |                     |
|           | COT            | 19 (47.5)                      | 40          | 18 (51.4)                       | 35          | 0.92 (0.58, 1.46)                | 0.726        |                     |
|           | BOOST II NZ    | 8 (50.0)                       | 16          | 4 (44.4)                        | 9           | 1.01 (0.43, 2.36)                | 0.989        |                     |
|           | BOOST II UK    | 14 (35.0)                      | 40          | 12 (33.3)                       | 36          | 1.41 (0.88, 2.28)                | 0.154        |                     |
|           | BOOST II AUS   | 23 (43.4)                      | 53          | 21 (35.6)                       | 59          | 1.22 (0.77, 1.93)                | 0.399        |                     |
|           | <b>NeOProM</b> | <b>98 (46.9)</b>               | <b>209</b>  | <b>104 (47.7)</b>               | <b>218</b>  | <b>1.02 (0.83, 1.24)</b>         | <b>0.863</b> |                     |

**# Supportive analysis of primary outcome:** including using alternative sources of information for classifying major disability as used within individual trials. This may have included a Bayley-II Mental Developmental Index (MDI) score <70, or another validated assessment tool (e.g. Griffiths test), or a paediatrician assessment, or parent-reported measure of neurodevelopmental impairment (e.g. able to speak less than 5-10 words) or other measures.

\*Analysis adjusted for trial and multiple births

#### **Abbreviations/definitions**

CI: confidence interval; RR: relative risk; GA: gestational age; SUPPORT: Surfactant Positive Airway Pressure and Pulse Oximetry Trial; COT: Canadian Oxygen Trial; BOOST: Benefits of Oxygen Saturation Targeting; NZ: New Zealand; UK: United Kingdom; AUS: Australia; NeOProM: Neonatal Oxygenation Prospective Meta-analysis; inborn: born inside the treating center; outborn: born outside the treating center (e.g. transferred from another hospital); vaginal: mode of delivery through the vagina; Caesarean: mode of delivery via surgical procedure; ANS: antenatal corticosteroids; singleton: child born as a single birth; multiple: more than one child per birth; start<6 hrs: intervention commenced less than 6 hours after birth; start>=6 hrs: intervention commenced greater than or equal to 6 hours after birth; original software: original oximeter software; revised software: revised oximeter software; SGA: small for gestational age; SGA NeOProM defined: small for gestational age as per definition used by NeOProM collaboration, i.e. less than 10th percentile using charts from Kramer et al.<sup>1</sup>

The subgroup analysis by oximeter software type (original vs revised) excludes n=74 infants in COT who were exposed to both the original and revised software.

Empty cells (.) indicate data not collected or not applicable in this trial.

\*\*\* Low / no event rate(s) makes parameter not estimable.

**eTable 10. Major disability (secondary analysis)\*, by subgroups**

|           |                | Lower Oxygen Saturation Target |             | Higher Oxygen Saturation Target |             | Adjusted* Relative Risk (95% CI) |              |                     |
|-----------|----------------|--------------------------------|-------------|---------------------------------|-------------|----------------------------------|--------------|---------------------|
| Subgroup  | Trial          | n (%)                          | N           | n (%)                           | N           | Adjusted RR                      | p-value      | interaction p-value |
| GA<26 wks | SUPPORT        | 35 (20.6)                      | 170         | 60 (30.3)                       | 198         | 0.66 (0.45, 0.96)                | 0.030        | 0.132               |
|           | COT            | 39 (21.7)                      | 180         | 41 (23.2)                       | 177         | 0.91 (0.62, 1.32)                | 0.617        |                     |
|           | BOOST NZ       | 2 (4.9)                        | 41          | 5 (11.4)                        | 44          | 0.44 (0.10, 1.97)                | 0.280        |                     |
|           | BOOST II UK    | 30 (32.3)                      | 93          | 35 (33.7)                       | 104         | 0.96 (0.64, 1.44)                | 0.839        |                     |
|           | BOOST II AUS   | 28 (18.3)                      | 153         | 27 (16.2)                       | 167         | 1.13 (0.71, 1.81)                | 0.601        |                     |
|           | <b>NeOProM</b> | <b>134 (21.0)</b>              | <b>637</b>  | <b>168 (24.3)</b>               | <b>690</b>  | <b>0.86 (0.71, 1.05)</b>         | <b>0.142</b> |                     |
| GA≥26 wks | SUPPORT        | 42 (13.9)                      | 303         | 44 (14.3)                       | 308         | 0.95 (0.63, 1.43)                | 0.812        |                     |
|           | COT            | 44 (15.8)                      | 279         | 38 (13.3)                       | 286         | 1.09 (0.72, 1.66)                | 0.679        |                     |
|           | BOOST NZ       | 8 (10.4)                       | 77          | 7 (9.9)                         | 71          | 1.16 (0.46, 2.97)                | 0.751        |                     |
|           | BOOST II UK    | 42 (24.4)                      | 172         | 38 (21.0)                       | 181         | 1.18 (0.80, 1.75)                | 0.401        |                     |
|           | BOOST II AUS   | 30 (11.9)                      | 252         | 30 (11.9)                       | 252         | 1.11 (0.69, 1.79)                | 0.676        |                     |
|           | <b>NeOProM</b> | <b>166 (15.3)</b>              | <b>1083</b> | <b>157 (14.3)</b>               | <b>1098</b> | <b>1.07 (0.87, 1.32)</b>         | <b>0.496</b> |                     |
| Inborn    | SUPPORT        | 77 (16.3)                      | 473         | 104 (20.6)                      | 506         | 0.77 (0.59, 1.02)                | 0.071        | 0.939               |
|           | COT            | 74 (17.3)                      | 427         | 72 (17.0)                       | 423         | 0.96 (0.71, 1.30)                | 0.795        |                     |
|           | BOOST NZ       | 9 (8.1)                        | 111         | 12 (10.9)                       | 110         | 0.77 (0.34, 1.75)                | 0.534        |                     |
|           | BOOST II UK    | 66 (27.8)                      | 237         | 60 (23.9)                       | 251         | 1.17 (0.86, 1.59)                | 0.312        |                     |
|           | BOOST II AUS   | 55 (14.6)                      | 376         | 56 (14.1)                       | 398         | 1.08 (0.77, 1.52)                | 0.658        |                     |
|           | <b>NeOProM</b> | <b>281 (17.3)</b>              | <b>1624</b> | <b>304 (18.0)</b>               | <b>1688</b> | <b>0.96 (0.83, 1.12)</b>         | <b>0.621</b> |                     |
| Outborn   | SUPPORT        |                                | .           |                                 | .           |                                  | .            |                     |
|           | COT            | 9 (28.1)                       | 32          | 7 (17.5)                        | 40          | 1.33 (0.87, 2.05)                | 0.192        |                     |
|           | BOOST NZ       | 1 (14.3)                       | 7           | 0                               | 5           |                                  | ***          |                     |
|           | BOOST II UK    | 6 (21.4)                       | 28          | 13 (38.2)                       | 34          | 0.55 (0.26, 1.18)                | 0.124        |                     |
|           | BOOST II AUS   | 3 (10.3)                       | 29          | 1 (4.8)                         | 21          | 2.11 (0.27, 16.4)                | 0.477        |                     |
|           | <b>NeOProM</b> | <b>19 (19.8)</b>               | <b>96</b>   | <b>21 (21.0)</b>                | <b>100</b>  | <b>0.97 (0.59, 1.60)</b>         | <b>0.906</b> |                     |
| Vaginal   | SUPPORT        | 19 (13.0)                      | 146         | 36 (20.7)                       | 174         | 0.55 (0.32, 0.95)                | 0.031        | 0.606               |
|           | COT            | 32 (18.8)                      | 170         | 34 (17.7)                       | 192         | 1.06 (0.69, 1.64)                | 0.788        |                     |
|           | BOOST NZ       | 4 (8.2)                        | 49          | 4 (7.7)                         | 52          | 1.06 (0.29, 3.82)                | 0.933        |                     |
|           | BOOST II UK    | 40 (25.8)                      | 155         | 44 (26.7)                       | 165         | 0.97 (0.66, 1.40)                | 0.854        |                     |
|           | BOOST II AUS   | 27 (14.4)                      | 188         | 26 (14.0)                       | 186         | 1.03 (0.62, 1.70)                | 0.921        |                     |
|           | <b>NeOProM</b> | <b>122 (17.2)</b>              | <b>708</b>  | <b>144 (18.7)</b>               | <b>769</b>  | <b>0.92 (0.74, 1.14)</b>         | <b>0.445</b> |                     |
| Caesarean | SUPPORT        | 58 (17.7)                      | 327         | 68 (20.5)                       | 332         | 0.86 (0.62, 1.20)                | 0.378        |                     |
|           | COT            | 51 (17.6)                      | 289         | 45 (16.7)                       | 270         | 0.97 (0.67, 1.41)                | 0.880        |                     |
|           | BOOST NZ       | 6 (8.7)                        | 69          | 8 (12.7)                        | 63          | 0.78 (0.30, 2.06)                | 0.618        |                     |
|           | BOOST II UK    | 32 (29.1)                      | 110         | 29 (24.2)                       | 120         | 1.20 (0.79, 1.84)                | 0.388        |                     |
|           | BOOST II AUS   | 30 (13.9)                      | 216         | 30 (13.0)                       | 231         | 1.11 (0.71, 1.75)                | 0.639        |                     |
|           | <b>NeOProM</b> | <b>177 (17.5)</b>              | <b>1011</b> | <b>180 (17.7)</b>               | <b>1016</b> | <b>0.99 (0.82, 1.20)</b>         | <b>0.938</b> |                     |
| ANS - No  | SUPPORT        | 3 (17.6)                       | 17          | 5 (20.8)                        | 24          | 0.93 (0.24, 3.59)                | 0.912        | 0.640               |
|           | COT            | 15 (32.6)                      | 46          | 16 (39.0)                       | 41          | 0.83 (0.46, 1.49)                | 0.535        |                     |
|           | BOOST NZ       | 0                              | 12          | 0                               | 10          |                                  | ***          |                     |
|           | BOOST II UK    | 5 (25.0)                       | 20          | 5 (25.0)                        | 20          | 1.00 (0.34, 2.93)                | 0.599        |                     |

eTable 10. Major disability (secondary analysis)<sup>†</sup>, by subgroups (continued)

|             |                | Lower Oxygen Saturation Target |             | Higher Oxygen Saturation Target |             | Adjusted* Relative Risk (95% CI) |              |                     |
|-------------|----------------|--------------------------------|-------------|---------------------------------|-------------|----------------------------------|--------------|---------------------|
| Subgroup    | Trial          | n (%)                          | N           | n (%)                           | N           | Adjusted RR                      | p-value      | interaction p-value |
|             | BOOST II AUS   | 5 (12.5)                       | 40          | 5 (18.5)                        | 27          | 0.64 (0.20, 2.03)                | 0.448        |                     |
|             | <b>NeOProM</b> | <b>28 (20.7)</b>               | <b>135</b>  | <b>31 (25.4)</b>                | <b>122</b>  | <b>0.84 (0.54, 1.28)</b>         | <b>0.83</b>  |                     |
| ANS - Yes   | SUPPORT        | 74 (16.2)                      | 456         | 99 (20.5)                       | 482         | 0.78 (0.59, 1.03)                | 0.081        |                     |
|             | COT            | 68 (16.5)                      | 412         | 63 (14.9)                       | 422         | 1.02 (0.74, 1.40)                | 0.892        |                     |
|             | BOOST NZ       | 10 (9.5)                       | 105         | 12 (11.4)                       | 105         | 0.86 (0.39, 1.90)                | 0.718        |                     |
|             | BOOST II UK    | 67 (27.5)                      | 244         | 67 (25.5)                       | 263         | 1.08 (0.80, 1.45)                | 0.611        |                     |
|             | BOOST II AUS   | 53 (14.6)                      | 363         | 52 (13.4)                       | 388         | 1.13 (0.79, 1.60)                | 0.508        |                     |
|             | <b>NeOProM</b> | <b>272 (17.2)</b>              | <b>1580</b> | <b>293 (17.7)</b>               | <b>1660</b> | <b>0.97 (0.84, 1.13)</b>         | <b>0.727</b> |                     |
| Male        | SUPPORT        | 46 (19.4)                      | 237         | 66 (23.7)                       | 278         | 0.81 (0.57, 1.14)                | 0.228        | 0.529               |
|             | COT            | 63 (24.5)                      | 257         | 53 (22.3)                       | 238         | 1.04 (0.75, 1.45)                | 0.813        |                     |
|             | BOOST NZ       | 6 (10.0)                       | 60          | 9 (15.0)                        | 60          | 0.73 (0.29, 1.87)                | 0.514        |                     |
|             | BOOST II UK    | 41 (30.6)                      | 134         | 44 (30.1)                       | 146         | 1.02 (0.71, 1.46)                | 0.927        |                     |
|             | BOOST II AUS   | 41 (20.5)                      | 200         | 35 (16.7)                       | 210         | 1.31 (0.85, 2.01)                | 0.223        |                     |
|             | <b>NeOProM</b> | <b>197 (22.2)</b>              | <b>888</b>  | <b>207 (22.2)</b>               | <b>932</b>  | <b>0.98 (0.83, 1.17)</b>         | <b>0.857</b> |                     |
| Female      | SUPPORT        | 31 (13.1)                      | 236         | 38 (16.7)                       | 228         | 0.75 (0.47, 1.18)                | 0.216        |                     |
|             | COT            | 20 (9.9)                       | 202         | 26 (11.6)                       | 225         | 0.85 (0.49, 1.47)                | 0.555        |                     |
|             | BOOST NZ       | 4 (6.9)                        | 58          | 3 (5.5)                         | 55          | 1.30 (0.30, 5.58)                | 0.725        |                     |
|             | BOOST II UK    | 31 (23.7)                      | 131         | 29 (20.9)                       | 139         | 1.14 (0.73, 1.79)                | 0.568        |                     |
|             | BOOST II AUS   | 17 (8.3)                       | 205         | 22 (10.5)                       | 209         | 0.79 (0.43, 1.44)                | 0.438        |                     |
|             | <b>NeOProM</b> | <b>103 (12.4)</b>              | <b>832</b>  | <b>118 (13.8)</b>               | <b>856</b>  | <b>0.90 (0.70, 1.16)</b>         | <b>0.418</b> |                     |
| Singleton   | SUPPORT        | 53 (15.1)                      | 351         | 81 (21.3)                       | 380         | 0.71 (0.52, 0.97)                | 0.032        | 0.967               |
|             | COT            | 56 (17.9)                      | 312         | 47 (14.6)                       | 323         | 1.23 (0.86, 1.76)                | 0.247        |                     |
|             | BOOST NZ       | 6 (7.0)                        | 86          | 11 (12.4)                       | 89          | 0.56 (0.22, 1.46)                | 0.238        |                     |
|             | BOOST II UK    | 44 (24.7)                      | 178         | 48 (23.9)                       | 201         | 1.04 (0.73, 1.48)                | 0.849        |                     |
|             | BOOST II AUS   | 45 (14.9)                      | 303         | 41 (12.8)                       | 320         | 1.16 (0.78, 1.72)                | 0.461        |                     |
|             | <b>NeOProM</b> | <b>204 (16.6)</b>              | <b>1230</b> | <b>228 (17.4)</b>               | <b>1313</b> | <b>0.96 (0.81, 1.14)</b>         | <b>0.642</b> |                     |
| Multiple    | SUPPORT        | 24 (19.7)                      | 122         | 23 (18.3)                       | 126         | 1.10 (0.61, 1.98)                | 0.756        |                     |
|             | COT            | 27 (18.4)                      | 147         | 32 (22.9)                       | 140         | 0.72 (0.47, 1.12)                | 0.150        |                     |
|             | BOOST NZ       | 4 (12.5)                       | 32          | 1 (3.8)                         | 26          | 4.04 (0.42, 38.6)                | 0.226        |                     |
|             | BOOST II UK    | 28 (32.2)                      | 87          | 25 (29.8)                       | 84          | 1.10 (0.69, 1.74)                | 0.698        |                     |
|             | BOOST II AUS   | 13 (12.7)                      | 102         | 16 (16.2)                       | 99          | 0.92 (0.49, 1.74)                | 0.802        |                     |
|             | <b>NeOProM</b> | <b>96 (19.6)</b>               | <b>490</b>  | <b>97 (20.4)</b>                | <b>475</b>  | <b>0.95 (0.74, 1.23)</b>         | <b>0.712</b> |                     |
| start<6 hrs | SUPPORT        | 75 (16.2)                      | 462         | 102 (20.6)                      | 496         | 0.77 (0.58, 1.02)                | 0.069        | 0.044               |
|             | COT            | 3 (14.3)                       | 21          | 5 (25.0)                        | 20          | 0.58 (0.16, 2.08)                | 0.405        |                     |
|             | BOOST NZ       | 5 (22.7)                       | 22          | 3 (15.0)                        | 20          | 1.67 (0.46, 6.10)                | 0.436        |                     |
|             | BOOST II UK    |                                |             |                                 |             |                                  |              |                     |
|             | BOOST II AUS   | 4 (10.3)                       | 39          | 11 (22.4)                       | 49          | 0.46 (0.16, 1.35)                | 0.156        |                     |
|             | <b>NeOProM</b> | <b>87 (16.0)</b>               | <b>544</b>  | <b>121 (20.7)</b>               | <b>585</b>  | <b>0.75 (0.57, 0.97)</b>         | <b>0.030</b> |                     |
| >=6 hrs     | SUPPORT        | 1 (20.0)                       | 5           | 0                               | 4           |                                  | ***          |                     |
|             | COT            | 80 (18.3)                      | 438         | 74 (16.7)                       | 443         | 1.03 (0.77, 1.38)                | 0.829        |                     |
|             | BOOST NZ       | 5 (5.2)                        | 96          | 9 (9.5)                         | 95          | 0.57 (0.20, 1.63)                | 0.294        |                     |

eTable 10. Major disability (secondary analysis)<sup>†</sup>, by subgroups (continued)

|           |                | Lower Oxygen Saturation Target |             | Higher Oxygen Saturation Target |             | Adjusted* Relative Risk (95% CI) |              |                     |
|-----------|----------------|--------------------------------|-------------|---------------------------------|-------------|----------------------------------|--------------|---------------------|
| Subgroup  | Trial          | n (%)                          | N           | n (%)                           | N           | Adjusted RR                      | p-value      | interaction p-value |
|           | BOOST II UK    |                                | .           |                                 | .           |                                  | .            |                     |
|           | BOOST II AUS   | 54 (14.8)                      | 365         | 46 (12.4)                       | 370         | 1.28 (0.89, 1.83)                | 0.181        |                     |
|           | <b>NeOProM</b> | <b>140 (15.5)</b>              | <b>904</b>  | <b>129 (14.1)</b>               | <b>912</b>  | <b>1.07 (0.86, 1.34)</b>         | <b>0.518</b> |                     |
| Original  | SUPPORT        | 77 (16.3)                      | 473         | 104 (20.6)                      | 506         | 0.77 (0.59, 1.02)                | 0.071        | 0.898               |
| software  | COT            | 42 (19.4)                      | 217         | 35 (16.4)                       | 213         | 1.14 (0.77, 1.70)                | 0.503        |                     |
|           | BOOST NZ       | 10 (8.5)                       | 118         | 12 (10.4)                       | 115         | 0.84 (0.38, 1.86)                | 0.668        |                     |
|           | BOOST II UK    | 21 (34.4)                      | 61          | 16 (25.4)                       | 63          | 1.35 (0.75, 2.40)                | 0.314        |                     |
|           | BOOST II AUS   | 36 (14.3)                      | 251         | 31 (11.9)                       | 260         | 1.23 (0.78, 1.92)                | 0.375        |                     |
|           | <b>NeOProM</b> | <b>186 (16.6)</b>              | <b>1120</b> | <b>198 (17.1)</b>               | <b>1157</b> | <b>0.97 (0.81, 1.17)</b>         | <b>0.762</b> |                     |
| Revised   | SUPPORT        |                                | .           |                                 | .           |                                  | .            |                     |
| software  | COT            | 38 (17.7)                      | 215         | 34 (16.0)                       | 213         | 1.02 (0.66, 1.58)                | 0.916        |                     |
|           | BOOST NZ       |                                | .           |                                 | .           |                                  | .            |                     |
|           | BOOST II UK    | 51 (25.0)                      | 204         | 57 (25.7)                       | 222         | 0.98 (0.70, 1.35)                | 0.887        |                     |
|           | BOOST II AUS   | 22 (14.3)                      | 154         | 26 (16.4)                       | 159         | 0.94 (0.57, 1.55)                | 0.808        |                     |
|           | <b>NeOProM</b> | <b>111 (19.4)</b>              | <b>573</b>  | <b>117 (19.7)</b>               | <b>594</b>  | <b>0.99 (0.78, 1.25)</b>         | <b>0.935</b> |                     |
| SGA:      | SUPPORT        | 71 (15.5)                      | 457         | 87 (18.6)                       | 468         | 0.81 (0.60, 1.09)                | 0.170        | 0.123               |
| Trialist  | COT            | 77 (18.3)                      | 420         | 72 (16.7)                       | 430         | 1.04 (0.78, 1.39)                | 0.782        |                     |
| defined - | BOOST II NZ    | 6 (5.8)                        | 103         | 10 (9.3)                        | 107         | 0.63 (0.24, 1.65)                | 0.347        |                     |
| No        | BOOST II UK    | 63 (27.9)                      | 226         | 62 (25.3)                       | 245         | 1.11 (0.82, 1.50)                | 0.509        |                     |
|           | BOOST II AUS   | 52 (14.7)                      | 354         | 44 (12.2)                       | 360         | 1.23 (0.85, 1.79)                | 0.274        |                     |
|           | <b>NeOProM</b> | <b>269 (17.2)</b>              | <b>1560</b> | <b>275 (17.1)</b>               | <b>1610</b> | <b>1.00 (0.86, 1.17)</b>         | <b>0.973</b> |                     |
| Yes       | SUPPORT        | 6 (37.5)                       | 16          | 17 (44.7)                       | 38          | 0.82 (0.40, 1.69)                | 0.587        |                     |
|           | COT            | 6 (15.4)                       | 39          | 7 (21.2)                        | 33          | 0.81 (0.51, 1.28)                | 0.365        |                     |
|           | BOOST II NZ    | 4 (26.7)                       | 15          | 2 (25.0)                        | 8           | 1.00 (0.23, 4.35)                | 0.999        |                     |
|           | BOOST II UK    | 9 (23.7)                       | 38          | 10 (25.6)                       | 39          | 1.56 (0.83, 2.91)                | 0.167        |                     |
|           | BOOST II AUS   | 6 (11.8)                       | 51          | 13 (22.0)                       | 59          | 0.53 (0.22, 1.30)                | 0.168        |                     |
|           | <b>NeOProM</b> | <b>31 (19.5)</b>               | <b>159</b>  | <b>49 (27.7)</b>                | <b>177</b>  | <b>0.80 (0.54, 1.19)</b>         | <b>0.271</b> |                     |
| SGA:      | SUPPORT        | 58 (14.0)                      | 413         | 80 (18.7)                       | 427         | 0.75 (0.54, 1.03)                | 0.077        | 0.430               |
| NeOProM   | COT            | 77 (18.3)                      | 420         | 72 (16.7)                       | 430         | 1.04 (0.78, 1.39)                | 0.782        |                     |
| defined - | BOOST II NZ    | 6 (5.8)                        | 103         | 10 (9.3)                        | 107         | 0.63 (0.24, 1.65)                | 0.347        |                     |
| No        | BOOST II UK    | 66 (27.7)                      | 238         | 67 (25.9)                       | 259         | 1.07 (0.80, 1.44)                | 0.637        |                     |
|           | BOOST II AUS   | 52 (14.7)                      | 354         | 44 (12.2)                       | 360         | 1.23 (0.85, 1.79)                | 0.274        |                     |
|           | <b>NeOProM</b> | <b>259 (17.0)</b>              | <b>1528</b> | <b>273 (17.2)</b>               | <b>1583</b> | <b>0.98 (0.84, 1.15)</b>         | <b>0.835</b> |                     |
| Yes       | SUPPORT        | 19 (31.7)                      | 60          | 24 (30.4)                       | 79          | 0.95 (0.56, 1.60)                | 0.840        |                     |
|           | COT            | 6 (15.4)                       | 39          | 7 (21.2)                        | 33          | 0.81 (0.51, 1.28)                | 0.365        |                     |
|           | BOOST II NZ    | 4 (26.7)                       | 15          | 2 (25.0)                        | 8           | 1.00 (0.23, 4.35)                | 0.999        |                     |
|           | BOOST II UK    | 6 (22.2)                       | 27          | 6 (23.1)                        | 26          | 1.71 (0.78, 3.76)                | 0.181        |                     |
|           | BOOST II AUS   | 6 (11.8)                       | 51          | 13 (22.0)                       | 59          | 0.53 (0.22, 1.30)                | 0.168        |                     |
|           | <b>NeOProM</b> | <b>41 (21.4)</b>               | <b>192</b>  | <b>52 (25.4)</b>                | <b>205</b>  | <b>0.86 (0.60, 1.23)</b>         | <b>0.410</b> |                     |

+ **Secondary analysis:** composite outcome of death or major disability by 18-24 months' age, corrected for prematurity. Major disability is any of the following: Bayley-III Developmental Assessment cognitive score <70 and/or language score <70; severe visual loss; cerebral palsy with Gross Motor Function Classification System (GMFCS) level 2 or higher at 18-24 months' age, corrected for prematurity; or deafness requiring hearing aids.

\*Analysis adjusted for trial and multiple births

#### **Abbreviations/definitions**

CI: confidence interval; RR: relative risk; GA: gestational age; SUPPORT: Surfactant Positive Airway Pressure and Pulse Oximetry Trial; COT: Canadian Oxygen Trial; BOOST: Benefits of Oxygen Saturation Targeting; NZ: New Zealand; UK: United Kingdom; AUS: Australia; NeOProm: Neonatal Oxygenation Prospective Meta-analysis; inborn: born inside the treating center; outborn: born outside the treating center (e.g. transferred from another hospital); vaginal: mode of delivery through the vagina; Caesarean: mode of delivery via surgical procedure; ANS: antenatal corticosteroids; singleton: child born as a single birth; multiple: more than one child per birth; start<6 hrs: intervention commenced less than 6 hours after birth; start>=6 hrs: intervention commenced greater than or equal to 6 hours after birth; original software: original oximeter software; revised software: revised oximeter software; SGA: small for gestational age; SGA NeOProm defined: small for gestational age as per definition used by NeOProm collaboration, i.e. less than 10th percentile using charts from Kramer et al.<sup>1</sup>

The subgroup analysis by oximeter software type (original vs revised) excludes n=74 infants in COT who were exposed to both the original and revised software.

Empty cells (.) indicate data not collected or not applicable in this trial.

\*\*\* Low / no event rate(s) makes parameter not estimable.

**eTable 11. Major disability (trialist defined)~, by subgroups**

|           |                | Lower Oxygen Saturation Target |             | Higher Oxygen Saturation Target |             | Adjusted* Relative Risk (95% CI) |              |                     |
|-----------|----------------|--------------------------------|-------------|---------------------------------|-------------|----------------------------------|--------------|---------------------|
| Subgroup  | Trial          | n (%)                          | N           | n (%)                           | N           | Adjusted RR                      | p-value      | interaction p-value |
| GA<26 wks | SUPPORT        | 24 (14.1)                      | 170         | 33 (16.8)                       | 197         | 0.81 (0.49, 1.34)                | 0.417        | 0.706               |
|           | COT            | 87 (46.5)                      | 187         | 84 (45.9)                       | 183         | 1.00 (0.81, 1.22)                | 0.978        |                     |
|           | BOOST NZ       | 17 (33.3)                      | 51          | 20 (35.1)                       | 57          | 1.40 (0.80, 2.44)                | 0.234        |                     |
|           | BOOST II UK    | 51 (41.5)                      | 123         | 57 (39.3)                       | 145         | 1.06 (0.79, 1.42)                | 0.702        |                     |
|           | BOOST II AUS   | 64 (38.3)                      | 167         | 63 (35.4)                       | 178         | 1.06 (0.82, 1.38)                | 0.651        |                     |
|           | <b>NeOProM</b> | <b>243 (34.8)</b>              | <b>698</b>  | <b>257 (33.8)</b>               | <b>760</b>  | <b>1.02 (0.89, 1.16)</b>         | <b>0.785</b> |                     |
| GA≥26 wks | SUPPORT        | 21 (7.0)                       | 302         | 20 (6.5)                        | 307         | 1.03 (0.56, 1.91)                | 0.920        |                     |
|           | COT            | 114 (38.8)                     | 294         | 111 (37.2)                      | 298         | 1.01 (0.83, 1.22)                | 0.954        |                     |
|           | BOOST NZ       | 23 (25.3)                      | 91          | 29 (34.5)                       | 84          | 0.68 (0.43, 1.06)                | 0.086        |                     |
|           | BOOST II UK    | 72 (31.6)                      | 228         | 65 (28.9)                       | 225         | 1.15 (0.88, 1.50)                | 0.300        |                     |
|           | BOOST II AUS   | 83 (29.4)                      | 282         | 67 (23.9)                       | 280         | 1.24 (0.95, 1.61)                | 0.109        |                     |
|           | <b>NeOProM</b> | <b>313 (26.1)</b>              | <b>1197</b> | <b>292 (24.5)</b>               | <b>1194</b> | <b>1.05 (0.93, 1.19)</b>         | <b>0.449</b> |                     |
| Inborn    | SUPPORT        | 45 (9.5)                       | 472         | 53 (10.5)                       | 504         | 0.88 (0.59, 1.30)                | 0.515        | 0.399               |
|           | COT            | 186 (41.6)                     | 447         | 179 (40.8)                      | 439         | 0.99 (0.86, 1.15)                | 0.935        |                     |
|           | BOOST NZ       | 38 (28.6)                      | 133         | 48 (36.4)                       | 132         | 0.80 (0.57, 1.12)                | 0.188        |                     |
|           | BOOST II UK    | 110 (35.4)                     | 311         | 108 (33.1)                      | 326         | 1.10 (0.89, 1.35)                | 0.378        |                     |
|           | BOOST II AUS   | 137 (33.0)                     | 415         | 125 (28.9)                      | 432         | 1.13 (0.93, 1.37)                | 0.204        |                     |
|           | <b>NeOProM</b> | <b>516 (29.0)</b>              | <b>1778</b> | <b>513 (28.0)</b>               | <b>1833</b> | <b>1.02 (0.93, 1.12)</b>         | <b>0.665</b> |                     |
| Outborn   | SUPPORT        | .                              | .           | .                               | .           | .                                | .            |                     |
|           | COT            | 15 (44.1)                      | 34          | 16 (38.1)                       | 42          | 1.16 (0.67, 1.99)                | 0.556        |                     |
|           | BOOST NZ       | 2 (22.2)                       | 9           | 1 (11.1)                        | 9           | 1.95 (0.21, 18.2)                | 0.556        |                     |
|           | BOOST II UK    | 13 (32.5)                      | 40          | 14 (31.8)                       | 44          | 1.06 (0.54, 2.10)                | 0.863        |                     |
|           | BOOST II AUS   | 10 (29.4)                      | 34          | 5 (19.2)                        | 26          | 1.50 (0.58, 3.91)                | 0.402        |                     |
|           | <b>NeOProM</b> | <b>40 (34.2)</b>               | <b>117</b>  | <b>36 (29.8)</b>                | <b>121</b>  | <b>1.20 (0.84, 1.71)</b>         | <b>0.316</b> |                     |
| Vaginal   | SUPPORT        | 10 (6.9)                       | 145         | 19 (11.0)                       | 173         | 0.54 (0.25, 1.17)                | 0.118        | 0.331               |
|           | COT            | 84 (47.2)                      | 178         | 73 (37.6)                       | 194         | 1.25 (0.99, 1.58)                | 0.059        |                     |
|           | BOOST NZ       | 16 (26.7)                      | 60          | 22 (34.4)                       | 64          | 1.57 (0.66, 3.75)                | 0.311        |                     |
|           | BOOST II UK    | 69 (34.8)                      | 198         | 72 (33.0)                       | 218         | 1.07 (0.82, 1.40)                | 0.607        |                     |
|           | BOOST II AUS   | 70 (33.0)                      | 212         | 62 (30.4)                       | 204         | 1.07 (0.81, 1.42)                | 0.616        |                     |
|           | <b>NeOProM</b> | <b>249 (31.4)</b>              | <b>793</b>  | <b>248 (29.1)</b>               | <b>853</b>  | <b>1.09 (0.95, 1.25)</b>         | <b>0.221</b> |                     |
| Caesarean | SUPPORT        | 35 (10.7)                      | 327         | 34 (10.3)                       | 331         | 1.03 (0.65, 1.64)                | 0.888        |                     |
|           | COT            | 117 (38.6)                     | 303         | 121 (42.3)                      | 286         | 0.89 (0.75, 1.05)                | 0.168        |                     |
|           | BOOST NZ       | 24 (29.3)                      | 82          | 27 (35.1)                       | 77          | 0.83 (0.54, 1.27)                | 0.386        |                     |
|           | BOOST II UK    | 54 (35.3)                      | 153         | 50 (32.9)                       | 152         | 1.11 (0.83, 1.48)                | 0.495        |                     |
|           | BOOST II AUS   | 75 (31.9)                      | 235         | 67 (26.7)                       | 251         | 1.20 (0.93, 1.54)                | 0.161        |                     |
|           | <b>NeOProM</b> | <b>305 (27.7)</b>              | <b>1100</b> | <b>299 (27.3)</b>               | <b>1097</b> | <b>0.99 (0.88, 1.12)</b>         | <b>0.931</b> |                     |
| ANS - No  | SUPPORT        | 2 (11.8)                       | 17          | 0                               | 24          |                                  | ***          | 0.614               |
|           | COT            | 25 (54.3)                      | 46          | 27 (62.8)                       | 43          | 0.68 (0.32, 1.44)                | 0.313        |                     |
|           | BOOST NZ       | 5 (31.3)                       | 16          | 4 (33.3)                        | 12          | 0.94 (0.32, 2.76)                | 0.943        |                     |
|           | BOOST II UK    | 8 (33.3)                       | 24          | 10 (37.0)                       | 27          | 1.01 (0.64, 1.61)                | 0.955        |                     |

eTable 11. Major disability (trialist defined)~, by subgroups (continued)

|             |                | Lower Oxygen Saturation Target |             | Higher Oxygen Saturation Target |             | Adjusted* Relative Risk (95% CI) |              |                     |
|-------------|----------------|--------------------------------|-------------|---------------------------------|-------------|----------------------------------|--------------|---------------------|
| Subgroup    | Trial          | n (%)                          | N           | n (%)                           | N           | Adjusted RR                      | p-value      | interaction p-value |
|             | BOOST II AUS   | 16 (32.7)                      | 49          | 9 (31.0)                        | 29          | 1.02 (0.52, 2.03)                | 0.947        |                     |
|             | <b>NeOProM</b> | <b>56 (36.8)</b>               | <b>152</b>  | <b>50 (37.0)</b>                | <b>135</b>  | <b>0.94 (0.73, 1.23)</b>         | <b>0.665</b> |                     |
| ANS - Yes   | SUPPORT        | 43 (9.5)                       | 455         | 53 (11.0)                       | 480         | 0.84 (0.57, 1.25)                | 0.394        |                     |
|             | COT            | 175 (40.3)                     | 434         | 168 (38.4)                      | 438         | 1.02 (0.88, 1.19)                | 0.776        |                     |
|             | BOOST NZ       | 35 (27.8)                      | 126         | 45 (34.9)                       | 129         | 0.80 (0.56, 1.14)                | 0.223        |                     |
|             | BOOST II UK    | 115 (35.3)                     | 326         | 111 (32.6)                      | 341         | 1.11 (0.90, 1.36)                | 0.331        |                     |
|             | BOOST II AUS   | 128 (32.2)                     | 397         | 121 (28.5)                      | 424         | 1.11 (0.92, 1.35)                | 0.280        |                     |
|             | <b>NeOProM</b> | <b>496 (28.5)</b>              | <b>1738</b> | <b>498 (27.5)</b>               | <b>1812</b> | <b>1.03 (0.94, 1.14)</b>         | <b>0.532</b> |                     |
| Male        | SUPPORT        | 25 (10.5)                      | 237         | 33 (11.9)                       | 278         | 0.88 (0.54, 1.45)                | 0.620        | 0.258               |
|             | COT            | 134 (50.4)                     | 266         | 117 (47.2)                      | 248         | 1.02 (0.86, 1.21)                | 0.791        |                     |
|             | BOOST NZ       | 27 (38.6)                      | 70          | 33 (42.9)                       | 77          | 0.90 (0.61, 1.32)                | 0.595        |                     |
|             | BOOST II UK    | 72 (39.8)                      | 181         | 72 (36.4)                       | 198         | 1.16 (0.88, 1.52)                | 0.298        |                     |
|             | BOOST II AUS   | 95 (42.6)                      | 223         | 78 (33.8)                       | 231         | 1.28 (1.02, 1.61)                | 0.036        |                     |
|             | <b>NeOProM</b> | <b>353 (36.1)</b>              | <b>977</b>  | <b>333 (32.3)</b>               | <b>1032</b> | <b>1.08 (0.96, 1.21)</b>         | <b>0.186</b> |                     |
| Female      | SUPPORT        | 20 (8.5)                       | 235         | 20 (8.8)                        | 226         | 0.88 (0.47, 1.65)                | 0.698        |                     |
|             | COT            | 67 (31.2)                      | 215         | 78 (33.5)                       | 233         | 0.92 (0.71, 1.20)                | 0.548        |                     |
|             | BOOST NZ       | 13 (18.1)                      | 72          | 16 (25.0)                       | 64          | 0.72 (0.38, 1.38)                | 0.439        |                     |
|             | BOOST II UK    | 51 (30.0)                      | 170         | 50 (29.1)                       | 172         | 1.04 (0.77, 1.41)                | 0.804        |                     |
|             | BOOST II AUS   | 52 (23.0)                      | 226         | 52 (22.9)                       | 227         | 1.00 (0.72, 1.39)                | 0.990        |                     |
|             | <b>NeOProM</b> | <b>203 (22.1)</b>              | <b>918</b>  | <b>216 (23.4)</b>               | <b>922</b>  | <b>0.96 (0.82, 1.12)</b>         | <b>0.589</b> |                     |
| Singleton   | SUPPORT        | 28 (8.0)                       | 350         | 42 (11.1)                       | 378         | 0.72 (0.46, 1.14)                | 0.158        | 0.835               |
|             | COT            | 139 (42.8)                     | 325         | 129 (38.9)                      | 332         | 1.10 (0.92, 1.32)                | 0.308        |                     |
|             | BOOST NZ       | 27 (26.0)                      | 104         | 35 (33.0)                       | 106         | 0.79 (0.52, 1.20)                | 0.265        |                     |
|             | BOOST II UK    | 78 (31.8)                      | 245         | 84 (31.7)                       | 265         | 1.00 (0.78, 1.30)                | 0.973        |                     |
|             | BOOST II AUS   | 110 (32.7)                     | 336         | 99 (28.2)                       | 351         | 1.16 (0.93, 1.46)                | 0.197        |                     |
|             | <b>NeOProM</b> | <b>382 (28.1)</b>              | <b>1360</b> | <b>389 (27.2)</b>               | <b>1432</b> | <b>1.04 (0.93, 1.16)</b>         | <b>0.525</b> |                     |
| Multiple    | SUPPORT        | 17 (13.9)                      | 122         | 11 (8.7)                        | 126         | 1.67 (0.77, 3.66)                | 0.197        |                     |
|             | COT            | 62 (39.7)                      | 156         | 66 (44.3)                       | 149         | 0.87 (0.71, 1.07)                | 0.200        |                     |
|             | BOOST NZ       | 13 (34.2)                      | 38          | 14 (40.0)                       | 35          | 0.87 (0.53, 1.42)                | 0.583        |                     |
|             | BOOST II UK    | 45 (42.5)                      | 106         | 38 (36.2)                       | 105         | 1.21 (0.91, 1.62)                | 0.188        |                     |
|             | BOOST II AUS   | 37 (32.7)                      | 113         | 31 (29.0)                       | 107         | 1.13 (0.81, 1.56)                | 0.475        |                     |
|             | <b>NeOProM</b> | <b>174 (32.5)</b>              | <b>535</b>  | <b>160 (30.7)</b>               | <b>522</b>  | <b>1.02 (0.89, 1.18)</b>         | <b>0.771</b> |                     |
| start<6 hrs | SUPPORT        | 44 (9.5)                       | 461         | 52 (10.5)                       | 494         | 0.88 (0.59, 1.30)                | 0.512        | 0.222               |
|             | COT            | 6 (27.3)                       | 22          | 10 (47.6)                       | 21          | 0.57 (0.25, 1.32)                | 0.191        |                     |
|             | BOOST NZ       | 13 (52.0)                      | 25          | 9 (36.0)                        | 25          | 1.95 (0.65, 5.82)                | 0.232        |                     |
|             | BOOST II UK    |                                | .           |                                 | .           |                                  | .            |                     |
|             | BOOST II AUS   | 13 (29.5)                      | 44          | 18 (34.6)                       | 52          | 0.81 (0.45, 1.49)                | 0.507        |                     |
|             | <b>NeOProM</b> | <b>76 (13.8)</b>               | <b>552</b>  | <b>89 (15.0)</b>                | <b>592</b>  | <b>0.89 (0.67, 1.17)</b>         | <b>0.395</b> |                     |
| >=6 hrs     | SUPPORT        | 0                              | 5           | 0                               | 4           |                                  | ***          |                     |
|             | COT            | 195 (42.5)                     | 459         | 185 (40.2)                      | 460         | 1.03 (0.89, 1.18)                | 0.709        |                     |
|             | BOOST NZ       | 27 (23.1)                      | 117         | 40 (34.5)                       | 116         | 0.67 (0.45, 1.00)                | 0.051        |                     |



**eTable 11. Major disability (trialist defined)~, by subgroups (continued)**

|           |                | Lower Oxygen Saturation Target |             | Higher Oxygen Saturation Target |             | Adjusted* Relative Risk (95% CI) |              |                     |
|-----------|----------------|--------------------------------|-------------|---------------------------------|-------------|----------------------------------|--------------|---------------------|
| Subgroup  | Trial          | n (%)                          | N           | n (%)                           | N           | Adjusted RR                      | p-value      | interaction p-value |
|           | BOOST II UK    |                                | .           |                                 | .           |                                  | .            |                     |
|           | BOOST II AUS   | 133 (33.1)                     | 402         | 112 (27.6)                      | 406         | 1.21 (0.99, 1.47)                | 0.060        |                     |
|           | <b>NeOProM</b> | <b>355 (36.1)</b>              | <b>983</b>  | <b>337 (34.2)</b>               | <b>986</b>  | <b>1.06 (0.94, 1.19)</b>         | <b>0.360</b> |                     |
| Original  | SUPPORT        | 45 (9.5)                       | 472         | 53 (10.5)                       | 504         | 0.88 (0.59, 1.30)                | 0.515        | 0.551               |
| software  | COT            | 91 (40.3)                      | 226         | 90 (41.7)                       | 216         | 0.94 (0.76, 1.16)                | 0.574        |                     |
|           | BOOST NZ       | 40 (28.2)                      | 142         | 49 (34.8)                       | 141         | 0.82 (0.59, 1.14)                | 0.233        |                     |
|           | BOOST II UK    | 39 (45.3)                      | 86          | 27 (32.9)                       | 82          | 1.43 (0.95, 2.16)                | 0.084        |                     |
|           | BOOST II AUS   | 88 (31.7)                      | 278         | 76 (27.0)                       | 282         | 1.16 (0.91, 1.48)                | 0.235        |                     |
|           | <b>NeOProM</b> | <b>303 (25.2)</b>              | <b>1204</b> | <b>295 (24.1)</b>               | <b>1225</b> | <b>1.01 (0.89, 1.15)</b>         | <b>0.828</b> |                     |
| Revised   | SUPPORT        |                                | .           |                                 | .           |                                  | .            |                     |
| software  | COT            | 97 (42.9)                      | 226         | 86 (37.7)                       | 228         | 1.09 (0.89, 1.35)                | 0.408        |                     |
|           | BOOST NZ       |                                | .           |                                 | .           |                                  | .            |                     |
|           | BOOST II UK    | 84 (31.7)                      | 265         | 95 (33.0)                       | 288         | 0.99 (0.79, 1.24)                | 0.910        |                     |
|           | BOOST II AUS   | 59 (34.5)                      | 171         | 54 (30.7)                       | 176         | 1.15 (0.86, 1.54)                | 0.345        |                     |
|           | <b>NeOProM</b> | <b>240 (36.3)</b>              | <b>662</b>  | <b>235 (34.0)</b>               | <b>692</b>  | <b>1.07 (0.93, 1.22)</b>         | <b>0.347</b> |                     |
| SGA:      | SUPPORT        | 40 (8.8)                       | 456         | 44 (9.4)                        | 466         | 0.90 (0.59, 1.37)                | 0.612        | 0.943               |
| Trialist  | COT            | 182 (41.3)                     | 441         | 177 (39.7)                      | 446         | 1.01 (0.87, 1.17)                | 0.882        |                     |
| defined - | BOOST II NZ    | 32 (25.4)                      | 126         | 45 (34.1)                       | 132         | 0.74 (0.53, 1.05)                | 0.090        |                     |
| No        | BOOST II UK    | 104 (35.0)                     | 297         | 103 (32.5)                      | 317         | 1.11 (0.90, 1.38)                | 0.333        |                     |
|           | BOOST II AUS   | 123 (31.2)                     | 394         | 109 (27.4)                      | 398         | 1.15 (0.94, 1.41)                | 0.185        |                     |
|           | <b>NeOProM</b> | <b>481 (28.1)</b>              | <b>1714</b> | <b>478 (27.2)</b>               | <b>1759</b> | <b>1.03 (0.94, 1.14)</b>         | <b>0.531</b> |                     |
| Yes       | SUPPORT        | 5 (31.3)                       | 16          | 9 (23.7)                        | 38          | 1.30 (0.52, 3.29)                | 0.575        |                     |
|           | COT            | 19 (47.5)                      | 40          | 18 (51.4)                       | 35          | 0.92 (0.58, 1.46)                | 0.726        |                     |
|           | BOOST II NZ    | 8 (50.0)                       | 16          | 4 (44.4)                        | 9           | 1.01 (0.43, 2.36)                | 0.989        |                     |
|           | BOOST II UK    | 19 (35.8)                      | 53          | 18 (34.6)                       | 52          | 1.40 (0.96, 2.04)                | 0.085        |                     |
|           | BOOST II AUS   | 23 (42.6)                      | 54          | 21 (35.0)                       | 60          | 1.22 (0.77, 1.93)                | 0.406        |                     |
|           | <b>NeOProM</b> | <b>74 (41.3)</b>               | <b>179</b>  | <b>70 (36.1)</b>                | <b>194</b>  | <b>1.07 (0.83, 1.39)</b>         | <b>0.581</b> |                     |
| SGA:      | SUPPORT        | 35 (8.5)                       | 412         | 40 (9.4)                        | 425         | 0.89 (0.57, 1.39)                | 0.597        | 0.938               |
| NeOProM   | COT            | 182 (41.3)                     | 441         | 177 (39.7)                      | 446         | 1.01 (0.87, 1.17)                | 0.882        |                     |
| defined - | BOOST II NZ    | 32 (25.4)                      | 126         | 45 (34.1)                       | 132         | 0.74 (0.53, 1.05)                | 0.090        |                     |
| No        | BOOST II UK    | 109 (35.0)                     | 311         | 110 (32.9)                      | 334         | 1.10 (0.89, 1.35)                | 0.382        |                     |
|           | BOOST II AUS   | 123 (31.2)                     | 394         | 109 (27.4)                      | 398         | 1.15 (0.94, 1.41)                | 0.185        |                     |
|           | <b>NeOProM</b> | <b>481 (28.6)</b>              | <b>1684</b> | <b>481 (27.7)</b>               | <b>1735</b> | <b>1.03 (0.93, 1.13)</b>         | <b>0.573</b> |                     |
| Yes       | SUPPORT        | 10 (16.7)                      | 60          | 13 (16.5)                       | 79          | 1.01 (0.48, 2.15)                | 0.979        |                     |
|           | COT            | 19 (47.5)                      | 40          | 18 (51.4)                       | 35          | 0.92 (0.58, 1.46)                | 0.726        |                     |
|           | BOOST II NZ    | 8 (50.0)                       | 16          | 4 (44.4)                        | 9           | 1.01 (0.43, 2.36)                | 0.989        |                     |
|           | BOOST II UK    | 14 (35.0)                      | 40          | 12 (33.3)                       | 36          | 1.41 (0.88, 2.28)                | 0.154        |                     |
|           | BOOST II AUS   | 23 (42.6)                      | 54          | 21 (35.0)                       | 60          | 1.22 (0.77, 1.93)                | 0.406        |                     |
|           | <b>NeOProM</b> | <b>74 (35.2)</b>               | <b>210</b>  | <b>68 (31.1)</b>                | <b>219</b>  | <b>1.04 (0.81, 1.35)</b>         | <b>0.743</b> |                     |

~ **Trialist defined analysis:** primary outcome as defined by trialists - includes alternative measures of disability as described in 'supportive analysis of primary outcome'

\*Analysis adjusted for trial and multiple births

### **Abbreviations/definitions**

CI: confidence interval; RR: relative risk; GA: gestational age; SUPPORT: Surfactant Positive Airway Pressure and Pulse Oximetry Trial; COT: Canadian Oxygen Trial; BOOST: Benefits of Oxygen Saturation Targeting; NZ: New Zealand; UK: United Kingdom; AUS: Australia; NeOProM: Neonatal Oxygenation Prospective Meta-analysis; inborn: born inside the treating center; outborn: born outside the treating center (e.g. transferred from another hospital); vaginal: mode of delivery through the vagina; Caesarean: mode of delivery via surgical procedure; ANS: antenatal corticosteroids; singleton: child born as a single birth; multiple: more than one child per birth; start<6 hrs: intervention commenced less than 6 hours after birth; start>=6 hrs: intervention commenced greater than or equal to 6 hours after birth; original software: original oximeter software; revised software: revised oximeter software; SGA: small for gestational age; SGA NeOProM defined: small for gestational age as per definition used by NeOProM collaboration, i.e. less than 10th percentile using charts from Kramer et al.<sup>1</sup>

The subgroup analysis by oximeter software type (original vs revised) excludes n=74 infants in COT who were exposed to both the original and revised software.

Empty cells (.) indicate data not collected or not applicable in this trial.

\*\*\* Low / no event rate(s) makes parameter not estimable.

**eTable 12. Cerebral palsy with GMFCS  $\geq 2^{\S}$ , by subgroups**

|                  |                | Lower Oxygen Saturation Target |             | Higher Oxygen Saturation Target |             | Adjusted* Relative Risk (95% CI) |              |                     |
|------------------|----------------|--------------------------------|-------------|---------------------------------|-------------|----------------------------------|--------------|---------------------|
| Subgroup         | Trial          | n (%)                          | N           | n (%)                           | N           | Adjusted RR                      | p-value      | interaction p-value |
| GA<26 wks        | SUPPORT        | 10 (5.8)                       | 173         | 12 (6.0)                        | 200         | 1.00 (0.44, 2.23)                | 0.993        | 0.679               |
|                  | COT            | 17 (9.0)                       | 189         | 16 (8.7)                        | 184         | 1.07 (0.56, 2.06)                | 0.831        |                     |
|                  | BOOST NZ       | 2 (3.9)                        | 51          | 2 (3.5)                         | 57          | 1.08 (0.16, 7.36)                | 0.934        |                     |
|                  | BOOST II UK    | 14 (11.3)                      | 124         | 7 (4.9)                         | 144         | 2.17 (0.92, 5.13)                | 0.076        |                     |
|                  | BOOST II AUS   | 7 (4.2)                        | 167         | 13 (7.3)                        | 178         | 0.57 (0.23, 1.40)                | 0.218        |                     |
|                  | <b>NeOProM</b> | <b>50 (7.1)</b>                | <b>704</b>  | <b>50 (6.6)</b>                 | <b>763</b>  | <b>1.08 (0.74, 1.58)</b>         | <b>0.673</b> |                     |
| GA $\geq$ 26 wks | SUPPORT        | 10 (3.3)                       | 306         | 8 (2.6)                         | 311         | 1.14 (0.44, 2.94)                | 0.786        |                     |
|                  | COT            | 13 (4.3)                       | 299         | 15 (4.9)                        | 304         | 0.92 (0.45, 1.88)                | 0.821        |                     |
|                  | BOOST NZ       | 3 (3.2)                        | 93          | 5 (6.0)                         | 84          | 0.56 (0.14, 2.26)                | 0.415        |                     |
|                  | BOOST II UK    | 21 (9.2)                       | 229         | 17 (7.5)                        | 226         | 1.26 (0.67, 2.39)                | 0.473        |                     |
|                  | BOOST II AUS   | 9 (3.2)                        | 279         | 12 (4.3)                        | 278         | 0.85 (0.34, 2.13)                | 0.734        |                     |
|                  | <b>NeOProM</b> | <b>56 (4.6)</b>                | <b>1206</b> | <b>57 (4.7)</b>                 | <b>1203</b> | <b>0.97 (0.66, 1.41)</b>         | <b>0.863</b> |                     |
| Inborn           | SUPPORT        | 20 (4.2)                       | 479         | 20 (3.9)                        | 511         | 1.01 (0.55, 1.88)                | 0.967        | 0.144               |
|                  | COT            | 24 (5.3)                       | 454         | 29 (6.5)                        | 445         | 0.85 (0.50, 1.42)                | 0.528        |                     |
|                  | BOOST NZ       | 4 (3.0)                        | 134         | 7 (5.3)                         | 131         | 0.57 (0.17, 1.91)                | 0.362        |                     |
|                  | BOOST II UK    | 32 (10.2)                      | 313         | 20 (6.2)                        | 324         | 1.68 (0.98, 2.90)                | 0.061        |                     |
|                  | BOOST II AUS   | 15 (3.6)                       | 412         | 25 (5.8)                        | 430         | 0.65 (0.34, 1.24)                | 0.190        |                     |
|                  | <b>NeOProM</b> | <b>95 (5.3)</b>                | <b>1792</b> | <b>101 (5.5)</b>                | <b>1841</b> | <b>0.97 (0.73, 1.27)</b>         | <b>0.802</b> |                     |
| Outborn          | SUPPORT        | .                              | .           | .                               | .           | .                                | .            |                     |
|                  | COT            | 6 (17.6)                       | 34          | 2 (4.7)                         | 43          | 3.68 (0.86, 15.6)                | 0.078        |                     |
|                  | BOOST NZ       | 1 (10.0)                       | 10          | 0                               | 10          |                                  | ***          |                     |
|                  | BOOST II UK    | 3 (7.5)                        | 40          | 4 (8.7)                         | 46          | 0.85 (0.20, 3.57)                | 0.828        |                     |
|                  | BOOST II AUS   | 1 (2.9)                        | 34          | 0                               | 26          |                                  | ***          |                     |
|                  | <b>NeOProM</b> | <b>11 (9.3)</b>                | <b>118</b>  | <b>6 (4.8)</b>                  | <b>125</b>  | <b>2.14 (0.84, 5.47)</b>         | <b>0.111</b> |                     |
| Vaginal          | SUPPORT        | 7 (4.8)                        | 147         | 6 (3.4)                         | 176         | 1.48 (0.51, 4.30)                | 0.467        | 0.994               |
|                  | COT            | 12 (6.6)                       | 181         | 12 (6.1)                        | 196         | 1.08 (0.50, 2.36)                | 0.840        |                     |
|                  | BOOST NZ       | 3 (5.0)                        | 60          | 4 (6.3)                         | 64          | 0.78 (0.18, 3.37)                | 0.744        |                     |
|                  | BOOST II UK    | 16 (8.0)                       | 199         | 11 (5.0)                        | 218         | 1.58 (0.75, 3.32)                | 0.229        |                     |
|                  | BOOST II AUS   | 6 (2.9)                        | 210         | 14 (6.9)                        | 203         | 0.43 (0.15, 1.23)                | 0.117        |                     |
|                  | <b>NeOProM</b> | <b>44 (5.5)</b>                | <b>797</b>  | <b>47 (5.5)</b>                 | <b>857</b>  | <b>1.02 (0.68, 1.53)</b>         | <b>0.940</b> |                     |
| Caesarean        | SUPPORT        | 13 (3.9)                       | 332         | 14 (4.2)                        | 335         | 0.85 (0.40, 1.83)                | 0.685        |                     |
|                  | COT            | 18 (5.9)                       | 307         | 19 (6.5)                        | 291         | 0.95 (0.51, 1.76)                | 0.860        |                     |
|                  | BOOST NZ       | 2 (2.4)                        | 84          | 3 (3.9)                         | 77          | 0.65 (0.11, 3.83)                | 0.636        |                     |
|                  | BOOST II UK    | 19 (12.3)                      | 154         | 13 (8.6)                        | 152         | 1.41 (0.74, 2.68)                | 0.292        |                     |
|                  | BOOST II AUS   | 10 (4.3)                       | 234         | 11 (4.4)                        | 250         | 0.96 (0.41, 2.23)                | 0.925        |                     |
|                  | <b>NeOProM</b> | <b>62 (5.6)</b>                | <b>1111</b> | <b>60 (5.4)</b>                 | <b>1105</b> | <b>1.03 (0.73, 1.45)</b>         | <b>0.876</b> |                     |
| ANS - No         | SUPPORT        | 2 (11.8)                       | 17          | 0                               | 24          |                                  | ***          | 0.941               |
|                  | COT            | 9 (19.6)                       | 46          | 8 (18.6)                        | 43          | 1.05 (0.45, 2.44)                | 0.908        |                     |
|                  | BOOST NZ       | 0                              | 16          | 0                               | 12          |                                  | ***          |                     |

eTable 12. Cerebral palsy with GMFCS  $\geq 2^{\S}$ , by subgroups (continued)

|             |                | Lower Oxygen Saturation Target |             | Higher Oxygen Saturation Target |             | Adjusted* Relative Risk (95% CI) |              |                     |
|-------------|----------------|--------------------------------|-------------|---------------------------------|-------------|----------------------------------|--------------|---------------------|
| Subgroup    | Trial          | n (%)                          | N           | n (%)                           | N           | Adjusted RR                      | p-value      | interaction p-value |
|             | BOOST II UK    | 3 (12.0)                       | 25          | 3 (11.1)                        | 27          | 0.97 (0.21, 4.41)                | 0.972        |                     |
|             | BOOST II AUS   | 3 (6.3)                        | 48          | 4 (13.8)                        | 29          | 0.41 (0.10, 1.71)                | 0.222        |                     |
|             | <b>NeOProM</b> | <b>17 (11.2)</b>               | <b>152</b>  | <b>15 (11.1)</b>                | <b>135</b>  | <b>1.01 (0.76, 1.34)</b>         | <b>0.970</b> |                     |
| ANS - Yes   | SUPPORT        | 18 (3.9)                       | 462         | 20 (4.1)                        | 487         | 0.96 (0.52, 1.78)                | 0.896        |                     |
|             | COT            | 21 (4.8)                       | 441         | 23 (5.2)                        | 445         | 0.97 (0.55, 1.71)                | 0.916        |                     |
|             | BOOST NZ       | 5 (3.9)                        | 128         | 7 (5.4)                         | 129         | 0.73 (0.24, 2.24)                | 0.582        |                     |
|             | BOOST II UK    | 32 (9.8)                       | 327         | 21 (6.2)                        | 341         | 1.62 (0.94, 2.76)                | 0.080        |                     |
|             | BOOST II AUS   | 13 (3.3)                       | 395         | 21 (5.0)                        | 422         | 0.69 (0.34, 1.39)                | 0.302        |                     |
|             | <b>NeOProM</b> | <b>89 (5.1)</b>                | <b>1753</b> | <b>92 (5.0)</b>                 | <b>1824</b> | <b>1.01 (0.76, 1.34)</b>         | <b>0.948</b> |                     |
| Male        | SUPPORT        | 11 (4.6)                       | 240         | 12 (4.3)                        | 282         | 1.09 (0.49, 2.41)                | 0.840        | 0.862               |
|             | COT            | 22 (8.2)                       | 269         | 21 (8.3)                        | 252         | 1.04 (0.59, 1.84)                | 0.883        |                     |
|             | BOOST NZ       | 4 (5.6)                        | 72          | 6 (7.8)                         | 77          | 0.75 (0.22, 2.55)                | 0.649        |                     |
|             | BOOST II UK    | 19 (10.4)                      | 182         | 13 (6.6)                        | 198         | 1.69 (0.84, 3.39)                | 0.144        |                     |
|             | BOOST II AUS   | 9 (4.1)                        | 220         | 16 (6.9)                        | 231         | 0.63 (0.28, 1.45)                | 0.281        |                     |
|             | <b>NeOProM</b> | <b>65 (6.6)</b>                | <b>983</b>  | <b>68 (6.5)</b>                 | <b>1040</b> | <b>0.99 (0.71, 1.39)</b>         | <b>0.972</b> |                     |
| Female      | SUPPORT        | 9 (3.8)                        | 239         | 8 (3.5)                         | 229         | 0.81 (0.30, 2.16)                | 0.673        |                     |
|             | COT            | 8 (3.7)                        | 219         | 10 (4.2)                        | 236         | 0.87 (0.35, 2.16)                | 0.762        |                     |
|             | BOOST NZ       | 1 (1.4)                        | 72          | 1 (1.6)                         | 64          | 0.89 (0.06, 13.8)                | 0.933        |                     |
|             | BOOST II UK    | 16 (9.4)                       | 171         | 11 (6.4)                        | 172         | 1.44 (0.70, 2.96)                | 0.325        |                     |
|             | BOOST II AUS   | 7 (3.1)                        | 226         | 9 (4.0)                         | 225         | 0.77 (0.29, 2.04)                | 0.602        |                     |
|             | <b>NeOProM</b> | <b>41 (4.4)</b>                | <b>927</b>  | <b>39 (4.2)</b>                 | <b>926</b>  | <b>1.05 (0.68, 1.63)</b>         | <b>0.826</b> |                     |
| Singleton   | SUPPORT        | 10 (2.8)                       | 355         | 18 (4.7)                        | 383         | 0.60 (0.28, 1.28)                | 0.186        | 0.130               |
|             | COT            | 17 (5.2)                       | 328         | 19 (5.6)                        | 338         | 0.92 (0.49, 1.74)                | 0.803        |                     |
|             | BOOST NZ       | 3 (2.9)                        | 105         | 7 (6.6)                         | 106         | 0.43 (0.11, 1.63)                | 0.215        |                     |
|             | BOOST II UK    | 20 (8.1)                       | 247         | 13 (4.9)                        | 264         | 1.64 (0.84, 3.23)                | 0.150        |                     |
|             | BOOST II AUS   | 10 (3.0)                       | 334         | 16 (4.6)                        | 349         | 0.65 (0.30, 1.42)                | 0.282        |                     |
|             | <b>NeOProM</b> | <b>60 (4.4)</b>                | <b>1369</b> | <b>73 (5.1)</b>                 | <b>1440</b> | <b>0.87 (0.62, 1.21)</b>         | <b>0.404</b> |                     |
| Multiple    | SUPPORT        | 10 (8.1)                       | 124         | 2 (1.6)                         | 128         | 5.24 (1.17, 23.5)                | 0.030        |                     |
|             | COT            | 13 (8.1)                       | 160         | 12 (8.0)                        | 150         | 1.10 (0.51, 2.36)                | 0.814        |                     |
|             | BOOST NZ       | 2 (5.1)                        | 39          | 0                               | 35          |                                  | ***          |                     |
|             | BOOST II UK    | 15 (14.2)                      | 106         | 11 (10.4)                       | 106         | 1.37 (0.66, 2.82)                | 0.398        |                     |
|             | BOOST II AUS   | 6 (5.4)                        | 112         | 9 (8.4)                         | 107         | 0.69 (0.25, 1.92)                | 0.475        |                     |
|             | <b>NeOProM</b> | <b>46 (8.5)</b>                | <b>541</b>  | <b>34 (6.5)</b>                 | <b>526</b>  | <b>1.30 (0.84, 2.02)</b>         | <b>0.235</b> |                     |
| start<6 hrs | SUPPORT        | 19 (4.1)                       | 468         | 20 (4.0)                        | 501         | 0.96 (0.51, 1.80)                | 0.896        | 0.699               |
|             | COT            | 2 (8.7)                        | 23          | 1 (4.8)                         | 21          | 1.83 (0.18, 18.4)                | 0.607        |                     |
|             | BOOST NZ       | 2 (8.0)                        | 25          | 2 (8.0)                         | 25          | 1.01 (0.17, 6.07)                | 0.990        |                     |
|             | BOOST II UK    |                                | .           |                                 | .           |                                  | .            |                     |
|             | BOOST II AUS   | 2 (4.5)                        | 44          | 5 (9.6)                         | 52          | 0.51 (0.11, 2.29)                | 0.380        |                     |
|             | <b>NeOProM</b> | <b>25 (4.5)</b>                | <b>560</b>  | <b>28 (4.7)</b>                 | <b>599</b>  | <b>0.90 (0.53, 1.54)</b>         | <b>0.704</b> |                     |
| >=6 hrs     | SUPPORT        | 0                              | 5           | 0                               | 4           |                                  | ***          |                     |

eTable 12. Cerebral palsy with GMFCS  $\geq 2^{\S}$ , by subgroups (continued)

|                            |                | Lower Oxygen Saturation Target |             | Higher Oxygen Saturation Target |             | Adjusted* Relative Risk (95% CI) |              |                     |
|----------------------------|----------------|--------------------------------|-------------|---------------------------------|-------------|----------------------------------|--------------|---------------------|
| Subgroup                   | Trial          | n (%)                          | N           | n (%)                           | N           | Adjusted RR                      | p-value      | interaction p-value |
|                            | COT            | 28 (6.0)                       | 465         | 30 (6.4)                        | 467         | 0.98 (0.60, 1.60)                | 0.922        |                     |
|                            | BOOST NZ       | 3 (2.5)                        | 119         | 5 (4.3)                         | 116         | 0.61 (0.15, 2.49)                | 0.494        |                     |
|                            | BOOST II UK    |                                | .           |                                 | .           |                                  | .            |                     |
|                            | BOOST II AUS   | 14 (3.5)                       | 399         | 20 (5.0)                        | 404         | 0.78 (0.39, 1.54)                | 0.470        |                     |
|                            | <b>NeOProM</b> | <b>45 (4.6)</b>                | <b>988</b>  | <b>55 (5.5)</b>                 | <b>991</b>  | <b>0.82 (0.56, 1.21)</b>         | <b>0.320</b> |                     |
| Original software          | SUPPORT        | 20 (4.2)                       | 479         | 20 (3.9)                        | 511         | 1.01 (0.55, 1.88)                | 0.967        | 0.800               |
|                            | COT            | 17 (7.3)                       | 232         | 13 (5.9)                        | 219         | 1.28 (0.64, 2.57)                | 0.486        |                     |
|                            | BOOST NZ       | 5 (3.5)                        | 144         | 7 (5.0)                         | 141         | 0.71 (0.23, 2.18)                | 0.548        |                     |
|                            | BOOST II UK    | 10 (11.4)                      | 88          | 7 (8.4)                         | 83          | 1.48 (0.53, 4.09)                | 0.454        |                     |
|                            | BOOST II AUS   | 11 (4.0)                       | 277         | 15 (5.3)                        | 283         | 0.74 (0.35, 1.56)                | 0.424        |                     |
|                            | <b>NeOProM</b> | <b>63 (5.2)</b>                | <b>1220</b> | <b>62 (5.0)</b>                 | <b>1237</b> | <b>1.02 (0.72, 1.44)</b>         | <b>0.925</b> |                     |
| Revised software           | SUPPORT        |                                | .           |                                 | .           |                                  | .            |                     |
|                            | COT            | 12 (5.3)                       | 227         | 14 (6.0)                        | 232         | 0.90 (0.43, 1.89)                | 0.790        |                     |
|                            | BOOST NZ       |                                | .           |                                 | .           |                                  | .            |                     |
|                            | BOOST II UK    | 25 (9.4)                       | 265         | 17 (5.9)                        | 287         | 1.59 (0.89, 2.85)                | 0.116        |                     |
|                            | BOOST II AUS   | 5 (3.0)                        | 169         | 10 (5.8)                        | 173         | 0.60 (0.26, 1.39)                | 0.233        |                     |
|                            | <b>NeOProM</b> | <b>42 (6.4)</b>                | <b>661</b>  | <b>41 (5.9)</b>                 | <b>692</b>  | <b>1.09 (0.72, 1.67)</b>         | <b>0.683</b> |                     |
| SGA: Trialist defined - No | SUPPORT        | 20 (4.3)                       | 462         | 17 (3.6)                        | 473         | 1.15 (0.60, 2.18)                | 0.677        | 0.385               |
|                            | COT            | 28 (6.3)                       | 448         | 28 (6.2)                        | 451         | 1.05 (0.63, 1.73)                | 0.857        |                     |
|                            | BOOST II NZ    | 4 (3.1)                        | 128         | 7 (5.3)                         | 132         | 0.61 (0.18, 2.03)                | 0.420        |                     |
|                            | BOOST II UK    | 30 (10.0)                      | 299         | 21 (6.6)                        | 317         | 1.55 (0.90, 2.66)                | 0.116        |                     |
|                            | BOOST II AUS   | 16 (4.1)                       | 391         | 21 (5.3)                        | 397         | 0.80 (0.42, 1.55)                | 0.515        |                     |
|                            | <b>NeOProM</b> | <b>98 (5.7)</b>                | <b>1728</b> | <b>94 (5.3)</b>                 | <b>1770</b> | <b>1.07 (0.81, 1.41)</b>         | <b>0.649</b> |                     |
| Yes                        | SUPPORT        | 0                              | 17          | 3 (7.9)                         | 38          |                                  | ***          |                     |
|                            | COT            | 2 (5.0)                        | 40          | 3 (8.1)                         | 37          | 0.62 (0.11, 3.44)                | 0.582        |                     |
|                            | BOOST II NZ    | 1 (6.3)                        | 16          | 0                               | 9           |                                  | ***          |                     |
|                            | BOOST II UK    | 5 (9.4)                        | 53          | 2 (3.8)                         | 52          | 2.45 (0.50, 12.08)               | 0.642        |                     |
|                            | BOOST II AUS   | 0                              | 54          | 4 (6.8)                         | 59          |                                  | ***          |                     |
|                            | <b>NeOProM</b> | <b>8 (4.4)</b>                 | <b>180</b>  | <b>12 (6.2)</b>                 | <b>195</b>  | <b>0.74 (0.32, 1.71)</b>         | <b>0.480</b> |                     |
| SGA: NeOProM defined - No  | SUPPORT        | 18 (4.3)                       | 418         | 17 (3.9)                        | 432         | 1.04 (0.54, 2.01)                | 0.915        | 0.468               |
|                            | COT            | 28 (6.3)                       | 448         | 28 (6.2)                        | 451         | 1.05 (0.63, 1.73)                | 0.857        |                     |
|                            | BOOST II NZ    | 4 (3.1)                        | 128         | 7 (5.3)                         | 132         | 0.61 (0.18, 2.03)                | 0.420        |                     |
|                            | BOOST II UK    | 32 (10.2)                      | 313         | 23 (6.9)                        | 334         | 1.51 (0.90, 2.53)                | 0.119        |                     |
|                            | BOOST II AUS   | 16 (4.1)                       | 391         | 21 (5.3)                        | 397         | 0.80 (0.42, 1.55)                | 0.515        |                     |
|                            | <b>NeOProM</b> | <b>98 (5.8)</b>                | <b>1698</b> | <b>96 (5.5)</b>                 | <b>1746</b> | <b>1.05 (0.80, 1.39)</b>         | <b>0.727</b> |                     |
| Yes                        | SUPPORT        | 2 (3.3)                        | 61          | 3 (3.8)                         | 79          | 0.86 (0.15, 5.01)                | 0.869        |                     |
|                            | COT            | 2 (5.0)                        | 40          | 3 (8.1)                         | 37          | 0.62 (0.11, 3.44)                | 0.582        |                     |
|                            | BOOST II NZ    | 1 (6.3)                        | 16          | 0                               | 9           |                                  | ***          |                     |
|                            | BOOST II UK    | 3 (7.5)                        | 40          | 1 (2.8)                         | 36          | 2.70 (0.29, 24.81)               | 0.681        |                     |
|                            | BOOST II AUS   | 0                              | 54          | 4 (6.8)                         | 59          |                                  | ***          |                     |
|                            | <b>NeOProM</b> | <b>8 (3.8)</b>                 | <b>211</b>  | <b>11 (5.0)</b>                 | <b>220</b>  | <b>0.76 (0.32, 1.83)</b>         | <b>0.543</b> |                     |

§ Includes infants with cerebral palsy where Gross Motor Function Classification System (GMFCS) was unknown

\* Analysis adjusted for trials and multiple births

### **Abbreviations/definitions**

CI: confidence interval; RR: relative risk; GA: gestational age; SUPPORT: Surfactant Positive Airway Pressure and Pulse Oximetry Trial; COT: Canadian Oxygen Trial; BOOST: Benefits of Oxygen Saturation Targeting; NZ: New Zealand; UK: United Kingdom; AUS: Australia; NeOProM: Neonatal Oxygenation Prospective Meta-analysis; inborn: born inside the treating center; outborn: born outside the treating center (e.g. transferred from another hospital); vaginal: mode of delivery through the vagina; Caesarean: mode of delivery via surgical procedure; ANS: antenatal corticosteroids; singleton: child born as a single birth; multiple: more than one child per birth; start<6 hrs: intervention commenced less than 6 hours after birth; start>=6 hrs: intervention commenced greater than or equal to 6 hours after birth; original software: original oximeter software; revised software: revised oximeter software; SGA: small for gestational age; SGA NeOProM defined: small for gestational age as per definition used by NeOProM collaboration, i.e. less than 10th percentile using charts from Kramer et al.<sup>1</sup>

The subgroup analysis by oximeter software type (original vs revised) excludes n=74 infants in COT who were exposed to both the original and revised software.

Empty cells (.) indicate data not collected or not applicable in this trial.

\*\*\* Low / no event rate(s) makes parameter not estimable.

**eTable 13. Severe visual impairment (trialist defined), by subgroups**

|           |                | Lower Oxygen Saturation Target |             | Higher Oxygen Saturation Target |             | Adjusted* Relative Risk (95% CI) |              |                     |
|-----------|----------------|--------------------------------|-------------|---------------------------------|-------------|----------------------------------|--------------|---------------------|
| Subgroup  | Trial          | n (%)                          | N           | n (%)                           | N           | Adjusted RR                      | p-value      | interaction p-value |
| GA<26 wks | SUPPORT        | 1 (0.6)                        | 173         | 3 (1.5)                         | 200         | 0.39 (0.04, 3.67)                | 0.407        | 0.925               |
|           | COT            | 4 (2.1)                        | 189         | 2 (1.1)                         | 184         | 1.95 (0.36, 10.50)               | 0.586        |                     |
|           | BOOST NZ       | 0                              | 51          | 1 (1.8)                         | 56          |                                  | ***          |                     |
|           | BOOST II UK    | 6 (4.9)                        | 123         | 6 (4.2)                         | 144         | 1.16 (0.40, 3.40)                | 0.781        |                     |
|           | BOOST II AUS   | 2 (1.2)                        | 169         | 0                               | 178         |                                  | ***          |                     |
|           | <b>NeOProM</b> | <b>13 (1.8)</b>                | <b>705</b>  | <b>12 (1.6)</b>                 | <b>762</b>  | <b>1.13 (0.46, 2.74)</b>         | <b>0.793</b> |                     |
| GA≥26 wks | SUPPORT        | 4 (1.3)                        | 306         | 3 (1.0)                         | 311         | 1.36 (0.31, 6.00)                | 0.684        |                     |
|           | COT            | 1 (0.3)                        | 298         | 1 (0.3)                         | 304         | 1.02 (0.06, 16.2)                | 0.989        |                     |
|           | BOOST NZ       | 0                              | 92          | 0                               | 84          |                                  | ***          |                     |
|           | BOOST II UK    | 6 (2.7)                        | 226         | 5 (2.2)                         | 225         | 1.39 (0.24, 7.92)                | 0.711        |                     |
|           | BOOST II AUS   | 1 (0.4)                        | 283         | 2 (0.7)                         | 281         | 0.50 (0.05, 5.51)                | 0.572        |                     |
|           | <b>NeOProM</b> | <b>12 (1.0)</b>                | <b>1205</b> | <b>11 (0.9)</b>                 | <b>1205</b> | <b>1.10 (0.49, 2.46)</b>         | <b>0.832</b> |                     |
| Inborn    | SUPPORT        | 5 (1.0)                        | 479         | 6 (1.2)                         | 511         | 0.89 (0.28, 2.90)                | 0.851        | ***                 |
|           | COT            | 5 (1.1)                        | 453         | 3 (0.7)                         | 445         | 1.12 (0.56, 2.24)                | 0.752        |                     |
|           | BOOST NZ       | 0                              | 133         | 1 (0.8)                         | 130         |                                  | ***          |                     |
|           | BOOST II UK    | 12 (3.9)                       | 309         | 9 (2.8)                         | 324         | 1.45 (0.55, 3.83)                | 0.451        |                     |
|           | BOOST II AUS   | 3 (0.7)                        | 417         | 2 (0.5)                         | 433         | 1.56 (0.26, 9.24)                | 0.626        |                     |
|           | <b>NeOProM</b> | <b>25 (1.4)</b>                | <b>1791</b> | <b>21 (1.1)</b>                 | <b>1843</b> | <b>1.24 (0.66, 2.31)</b>         | <b>0.504</b> |                     |
| Outborn   | SUPPORT        | .                              | .           | .                               | .           | .                                | .            |                     |
|           | COT            | 0                              | 34          | 0                               | 43          |                                  | ***          |                     |
|           | BOOST NZ       | 0                              | 10          | 0                               | 10          |                                  | ***          |                     |
|           | BOOST II UK    | 0                              | 40          | 2 (4.4)                         | 45          |                                  | ***          |                     |
|           | BOOST II AUS   | 0                              | 35          | 0                               | 26          |                                  | ***          |                     |
|           | <b>NeOProM</b> | <b>0</b>                       | <b>119</b>  | <b>2 (1.6)</b>                  | <b>124</b>  |                                  | ***          |                     |
| Vaginal   | SUPPORT        | 1 (0.7)                        | 147         | 1 (0.6)                         | 176         | 1.20 (0.08, 19.0)                | 0.898        | 0.782               |
|           | COT            | 2 (1.1)                        | 180         | 0                               | 196         |                                  | ***          |                     |
|           | BOOST NZ       | 0                              | 60          | 0                               | 63          |                                  | ***          |                     |
|           | BOOST II UK    | 7 (3.5)                        | 198         | 8 (3.7)                         | 217         | 0.97 (0.36, 2.61)                | 0.946        |                     |
|           | BOOST II AUS   | 0                              | 214         | 1 (0.5)                         | 204         |                                  | ***          |                     |
|           | <b>NeOProM</b> | <b>10 (1.3)</b>                | <b>799</b>  | <b>10 (1.2)</b>                 | <b>856</b>  | <b>1.09 (0.48, 2.48)</b>         | <b>0.843</b> |                     |
| Caesarean | SUPPORT        | 4 (1.2)                        | 332         | 5 (1.5)                         | 335         | 0.81 (0.22, 2.99)                | 0.756        |                     |
|           | COT            | 3 (1.0)                        | 307         | 3 (1.0)                         | 291         | 0.99 (0.98, 1.00)                | 0.097        |                     |
|           | BOOST NZ       | 0                              | 83          | 1 (1.3)                         | 77          |                                  | ***          |                     |
|           | BOOST II UK    | 5 (3.3)                        | 151         | 3 (2.0)                         | 152         | 1.54 (0.43, 5.54)                | 0.511        |                     |
|           | BOOST II AUS   | 3 (1.3)                        | 236         | 1 (0.4)                         | 252         | 3.20 (0.34, 30.4)                | 0.311        |                     |
|           | <b>NeOProM</b> | <b>15 (1.4)</b>                | <b>1109</b> | <b>13 (1.2)</b>                 | <b>1107</b> | <b>1.19 (0.52, 2.68)</b>         | <b>0.683</b> |                     |
| ANS - No  | SUPPORT        | 0                              | 17          | 0                               | 24          |                                  | ***          | ***                 |
|           | COT            | 0                              | 46          | 0                               | 43          |                                  | ***          |                     |
|           | BOOST NZ       | 0                              | 16          | 0                               | 12          |                                  | ***          |                     |

eTable 13. Severe visual impairment (trialist defined), by subgroups (continued)

|             |                | Lower Oxygen Saturation Target |             | Higher Oxygen Saturation Target |             | Adjusted* Relative Risk (95% CI) |              |                     |
|-------------|----------------|--------------------------------|-------------|---------------------------------|-------------|----------------------------------|--------------|---------------------|
| Subgroup    | Trial          | n (%)                          | N           | n (%)                           | N           | Adjusted RR                      | p-value      | interaction p-value |
|             | BOOST II UK    | 0                              | 25          | 0                               | 28          |                                  | ***          |                     |
|             | BOOST II AUS   | 0                              | 50          | 0                               | 29          |                                  | ***          |                     |
|             | <b>NeOProM</b> | <b>0</b>                       | <b>154</b>  | <b>0</b>                        | <b>136</b>  |                                  | ***          |                     |
| ANS - Yes   | SUPPORT        | 5 (1.1)                        | 462         | 6 (1.2)                         | 487         | 0.88 (0.27, 2.86)                | 0.830        |                     |
|             | COT            | 5 (1.1)                        | 440         | 3 (0.7)                         | 445         | 1.15 (0.55, 2.38)                | 0.707        |                     |
|             | BOOST NZ       | 0                              | 127         | 1 (0.8)                         | 128         |                                  | ***          |                     |
|             | BOOST II UK    | 12 (3.7)                       | 323         | 11 (3.2)                        | 339         | 1.16 (0.46, 2.92)                | 0.750        |                     |
|             | BOOST II AUS   | 3 (0.8)                        | 399         | 2 (0.5)                         | 425         | 1.60 (0.27, 9.48)                | 0.606        |                     |
|             | <b>NeOProM</b> | <b>25 (1.4)</b>                | <b>1751</b> | <b>23 (1.3)</b>                 | <b>1824</b> | <b>1.13 (0.61, 2.09)</b>         | <b>0.703</b> |                     |
| Male        | SUPPORT        | 1 (0.4)                        | 240         | 4 (1.4)                         | 282         | 0.31 (0.03, 2.70)                | 0.286        | 0.076               |
|             | COT            | 5 (1.9)                        | 269         | 2 (0.8)                         | 252         | 2.34 (0.46, 11.96)               | 0.598        |                     |
|             | BOOST NZ       | 0                              | 71          | 0                               | 77          |                                  | ***          |                     |
|             | BOOST II UK    | 10 (5.6)                       | 180         | 5 (2.5)                         | 197         | 2.42 (0.56, 10.5)                | 0.237        |                     |
|             | BOOST II AUS   | 3 (1.3)                        | 224         | 1 (0.4)                         | 231         | 3.12 (0.32, 30.1)                | 0.324        |                     |
|             | <b>NeOProM</b> | <b>19 (1.9)</b>                | <b>984</b>  | <b>12 (1.2)</b>                 | <b>1039</b> | <b>1.69 (0.82, 3.47)</b>         | 0.161        |                     |
| Female      | SUPPORT        | 4 (1.7)                        | 239         | 2 (0.9)                         | 229         | 1.92 (0.36, 10.4)                | 0.447        |                     |
|             | COT            | 0                              | 218         | 1 (0.4)                         | 236         |                                  | ***          |                     |
|             | BOOST NZ       | 0                              | 72          | 1 (1.6)                         | 63          |                                  | ***          |                     |
|             | BOOST II UK    | 2 (1.2)                        | 169         | 6 (3.5)                         | 172         | 0.34 (0.07, 1.64)                | 0.180        |                     |
|             | BOOST II AUS   | 0                              | 228         | 1 (0.4)                         | 228         |                                  | ***          |                     |
|             | <b>NeOProM</b> | <b>6 (0.6)</b>                 | <b>926</b>  | <b>11 (1.2)</b>                 | <b>928</b>  | <b>0.54 (0.20, 1.45)</b>         | <b>0.222</b> |                     |
| Singleton   | SUPPORT        | 3 (0.8)                        | 355         | 5 (1.3)                         | 383         | 0.65 (0.16, 2.69)                | 0.549        | 0.134               |
|             | COT            | 1 (0.3)                        | 327         | 3 (0.9)                         | 338         | 0.34 (0.04, 3.30)                | 0.355        |                     |
|             | BOOST NZ       | 0                              | 105         | 1 (1.0)                         | 104         |                                  | ***          |                     |
|             | BOOST II UK    | 7 (2.9)                        | 244         | 6 (2.3)                         | 264         | 1.26 (0.43, 3.70)                | 0.671        |                     |
|             | BOOST II AUS   | 1 (0.3)                        | 338         | 2 (0.6)                         | 352         | 0.52 (0.05, 5.72)                | 0.593        |                     |
|             | <b>NeOProM</b> | <b>12 (0.9)</b>                | <b>1369</b> | <b>17 (1.2)</b>                 | <b>1441</b> | <b>0.76 (0.36, 1.58)</b>         | <b>0.457</b> |                     |
| Multiple    | SUPPORT        | 2 (1.6)                        | 124         | 1 (0.8)                         | 128         | 2.06 (0.19, 22.1)                | 0.549        |                     |
|             | COT            | 4 (2.5)                        | 160         | 0                               | 150         |                                  | ***          |                     |
|             | BOOST NZ       | 0                              | 38          | 0                               | 36          |                                  | ***          |                     |
|             | BOOST II UK    | 5 (4.8)                        | 105         | 5 (4.8)                         | 105         | 1.03 (0.24, 4.43)                | 0.972        |                     |
|             | BOOST II AUS   | 2 (1.8)                        | 114         | 0                               | 107         |                                  | ***          |                     |
|             | <b>NeOProM</b> | <b>13 (2.4)</b>                | <b>541</b>  | <b>6 (1.1)</b>                  | <b>526</b>  | <b>1.97 (0.80, 4.84)</b>         | 0.142        |                     |
| start<6 hrs | SUPPORT        | 5 (1.1)                        | 468         | 6 (1.2)                         | 501         | 0.90 (0.28, 2.91)                | 0.856        | 0.351               |
|             | COT            | 0                              | 23          | 1 (4.8)                         | 21          |                                  | ***          |                     |
|             | BOOST NZ       | 0                              | 24          | 0                               | 24          |                                  | ***          |                     |
|             | BOOST II UK    | .                              | .           | .                               | .           |                                  | .            |                     |
|             | BOOST II AUS   | 0                              | 44          | 0                               | 52          |                                  | ***          |                     |
|             | <b>NeOProM</b> | <b>5 (0.9)</b>                 | <b>559</b>  | <b>7 (1.2)</b>                  | <b>598</b>  | <b>0.75 (0.26, 2.28)</b>         | <b>0.63</b>  |                     |
| >=6 hrs     | SUPPORT        | 0                              | 5           | 0                               | 4           |                                  | ***          |                     |



eTable 13. Severe visual impairment (trialist defined), by subgroups (continued)

|                            |                | Lower Oxygen Saturation Target |             | Higher Oxygen Saturation Target |             | Adjusted* Relative Risk (95% CI) |              |                     |
|----------------------------|----------------|--------------------------------|-------------|---------------------------------|-------------|----------------------------------|--------------|---------------------|
| Subgroup                   | Trial          | n (%)                          | N           | n (%)                           | N           | Adjusted RR                      | p-value      | interaction p-value |
|                            | COT            | 5 (1.1)                        | 464         | 2 (0.4)                         | 467         | 2.52 (0.49, 12.90)               | 0.432        |                     |
|                            | BOOST NZ       | 0                              | 119         | 1 (0.9)                         | 116         |                                  | ***          |                     |
|                            | BOOST II UK    |                                | .           |                                 | .           |                                  | .            |                     |
|                            | BOOST II AUS   | 3 (0.7)                        | 405         | 2 (0.5)                         | 407         | 1.51 (0.25, 8.97)                | 0.653        |                     |
|                            | <b>NeOProM</b> | <b>8 (0.8)</b>                 | <b>993</b>  | <b>5 (0.5)</b>                  | <b>994</b>  | <b>1.60 (0.53, 4.48)</b>         | <b>0.43</b>  |                     |
| Original software          | SUPPORT        | 5 (1.0)                        | 479         | 6 (1.2)                         | 511         | 0.89 (0.28, 2.90)                | 0.851        | 0.306               |
|                            | COT            | 3 (1.3)                        | 231         | 1 (0.5)                         | 219         | 2.84 (0.30, 27.14)               | 0.215        |                     |
|                            | BOOST NZ       | 0                              | 143         | 1 (0.7)                         | 140         |                                  | ***          |                     |
|                            | BOOST II UK    | 4 (4.6)                        | 87          | 1 (1.3)                         | 80          |                                  | ***          |                     |
|                            | BOOST II AUS   | 2 (0.7)                        | 281         | 0                               | 284         |                                  | ***          |                     |
|                            | <b>NeOProM</b> | <b>14 (1.1)</b>                | <b>1221</b> | <b>9 (0.7)</b>                  | <b>1234</b> | <b>1.65 (0.63, 4.32)</b>         | <b>0.304</b> |                     |
| Revised software           | SUPPORT        |                                | .           |                                 | .           |                                  | .            |                     |
|                            | COT            | 2 (0.9)                        | 227         | 2 (0.9)                         | 232         | 1.03 (0.15, 7.21)                | 0.980        |                     |
|                            | BOOST NZ       |                                | .           |                                 | .           |                                  | .            |                     |
|                            | BOOST II UK    | 8 (3.1)                        | 262         | 10 (3.5)                        | 289         | 0.87 (0.36, 2.13)                | 0.769        |                     |
|                            | BOOST II AUS   | 1 (0.6)                        | 171         | 2 (1.1)                         | 175         | 0.51 (0.05, 5.56)                | 0.582        |                     |
|                            | <b>NeOProM</b> | <b>11 (1.7)</b>                | <b>660</b>  | <b>14 (2.0)</b>                 | <b>696</b>  | <b>0.85 (0.39, 1.85)</b>         | <b>0.682</b> |                     |
| SGA: Trialist defined - No | SUPPORT        | 4 (0.9)                        | 462         | 4 (0.8)                         | 473         | 1.03 (0.26, 4.08)                | 0.966        | 0.729               |
|                            | COT            | 5 (1.1)                        | 447         | 2 (0.4)                         | 451         | 2.52 (0.49, 12.93)               | 0.287        |                     |
|                            | BOOST II NZ    | 0                              | 128         | 1 (0.8)                         | 131         |                                  | ***          |                     |
|                            | BOOST II UK    | 11 (3.7)                       | 296         | 11 (3.5)                        | 316         | 1.00 (0.39, 2.60)                | 0.999        |                     |
|                            | BOOST II AUS   | 2 (0.5)                        | 397         | 2 (0.5)                         | 399         | 1.00 (0.14, 7.06)                | 0.999        |                     |
|                            | <b>NeOProM</b> | <b>22 (1.3)</b>                | <b>1730</b> | <b>20 (1.1)</b>                 | <b>1770</b> | <b>1.07 (0.54, 2.09)</b>         | <b>0.850</b> |                     |
| Yes                        | SUPPORT        | 1 (5.9)                        | 17          | 2 (5.3)                         | 38          | 1.11 (0.11, 11.5)                | 0.927        |                     |
|                            | COT            | 0                              | 40          | 1 (2.7)                         | 37          |                                  | ***          |                     |
|                            | BOOST II NZ    | 0                              | 15          | 0                               | 9           |                                  | ***          |                     |
|                            | BOOST II UK    | 1 (1.9)                        | 52          | 0                               | 52          |                                  | ***          |                     |
|                            | BOOST II AUS   | 1 (1.9)                        | 54          | 0                               | 60          |                                  | ***          |                     |
|                            | <b>NeOProM</b> | <b>3 (1.7)</b>                 | <b>178</b>  | <b>3 (1.5)</b>                  | <b>196</b>  | <b>1.31 (0.35, 4.86)</b>         | <b>0.690</b> |                     |
| SGA: NeOProM defined - No  | SUPPORT        | 4 (1.0)                        | 418         | 4 (0.9)                         | 432         | 1.04 (0.26, 4.12)                | 0.954        | 0.767               |
|                            | COT            | 5 (1.1)                        | 447         | 2 (0.4)                         | 451         | 2.52 (0.49, 12.93)               | 0.287        |                     |
|                            | BOOST II NZ    | 0                              | 128         | 1 (0.8)                         | 131         |                                  | ***          |                     |
|                            | BOOST II UK    | 11 (3.5)                       | 310         | 11 (3.3)                        | 333         | 1.01 (0.39, 2.62)                | 0.990        |                     |
|                            | BOOST II AUS   | 2 (0.5)                        | 397         | 2 (0.5)                         | 399         | 1.00 (0.14, 7.06)                | 0.999        |                     |
|                            | <b>NeOProM</b> | <b>22 (1.3)</b>                | <b>1700</b> | <b>20 (1.1)</b>                 | <b>1746</b> | <b>1.07 (0.54, 2.11)</b>         | <b>0.843</b> |                     |
| Yes                        | SUPPORT        | 1 (1.6)                        | 61          | 2 (2.5)                         | 79          | 0.65 (0.06, 6.98)                | 0.720        |                     |
|                            | COT            | 0                              | 40          | 1 (2.7)                         | 37          |                                  | ***          |                     |
|                            | BOOST II NZ    | 0                              | 15          | 0                               | 9           |                                  | ***          |                     |
|                            | BOOST II UK    | 1 (2.6)                        | 39          | 0                               | 36          |                                  | ***          |                     |
|                            | BOOST II AUS   | 1 (1.9)                        | 54          | 0                               | 60          |                                  | ***          |                     |
|                            | <b>NeOProM</b> | <b>3 (1.4)</b>                 | <b>209</b>  | <b>3 (1.4)</b>                  | <b>221</b>  | <b>1.08 (0.29, 3.97)</b>         | <b>0.91</b>  |                     |

\* Analysis adjusted for trials and multiple births

### **Abbreviations/definitions**

CI: confidence interval; RR: relative risk; GA: gestational age; SUPPORT: Surfactant Positive Airway Pressure and Pulse Oximetry Trial; COT: Canadian Oxygen Trial; BOOST: Benefits of Oxygen Saturation Targeting; NZ: New Zealand; UK: United Kingdom; AUS: Australia; NeOProM: Neonatal Oxygenation Prospective Meta-analysis; inborn: born inside the treating center; outborn: born outside the treating center (e.g. transferred from another hospital); vaginal: mode of delivery through the vagina; Caesarean: mode of delivery via surgical procedure; ANS: antenatal corticosteroids; singleton: child born as a single birth; multiple: more than one child per birth; start<6 hrs: intervention commenced less than 6 hours after birth; start>=6 hrs: intervention commenced greater than or equal to 6 hours after birth; original software: original oximeter software; revised software: revised oximeter software; SGA: small for gestational age; SGA NeOProM defined: small for gestational age as per definition used by NeOProM collaboration, i.e. less than 10th percentile using charts from Kramer et al.<sup>1</sup>

The subgroup analysis by oximeter software type (original vs revised) excludes n=74 infants in COT who were exposed to both the original and revised software.

Empty cells (.) indicate data not collected or not applicable in this trial.

\*\*\* Low / no event rate(s) makes parameter not estimable.

eTable 14. Deafness requiring hearing aids or worse, by subgroups

|           |                | Lower Oxygen Saturation Target |             | Higher Oxygen Saturation Target |             | Adjusted* Relative Risk (95% CI) |              |                     |
|-----------|----------------|--------------------------------|-------------|---------------------------------|-------------|----------------------------------|--------------|---------------------|
| Subgroup  | Trial          | n (%)                          | N           | n (%)                           | N           | Adjusted RR                      | p-value      | interaction p-value |
| GA<26 wks | SUPPORT        | 3 (1.7)                        | 173         | 5 (2.5)                         | 200         | 0.70 (0.17, 2.88)                | 0.624        | 0.110               |
|           | COT            | 12 (6.3)                       | 189         | 10 (5.4)                        | 185         | 1.19 (0.52, 2.76)                | 0.680        |                     |
|           | BOOST NZ       | 1 (2.0)                        | 51          | 1 (1.8)                         | 56          | 1.10 (0.07, 16.7)                | 0.947        |                     |
|           | BOOST II UK    | 9 (7.3)                        | 123         | 19 (13.1)                       | 145         | 0.59 (0.28, 1.27)                | 0.177        |                     |
|           | BOOST II AUS   | 6 (3.6)                        | 166         | 6 (3.4)                         | 176         | 1.06 (0.35, 3.23)                | 0.916        |                     |
|           | <b>NeOProM</b> | <b>31 (4.4)</b>                | <b>702</b>  | <b>41 (5.4)</b>                 | <b>762</b>  | <b>0.84 (0.54, 1.31)</b>         | <b>0.441</b> |                     |
| GA≥26 wks | SUPPORT        | 4 (1.3)                        | 306         | 1 (0.3)                         | 311         | 4.07 (0.46, 36.2)                | 0.209        |                     |
|           | COT            | 6 (2.0)                        | 298         | 2 (0.7)                         | 304         | 3.07 (0.62, 15.1)                | 0.168        |                     |
|           | BOOST NZ       | 1 (1.1)                        | 91          | 0                               | 83          |                                  | ***          |                     |
|           | BOOST II UK    | 13 (5.7)                       | 229         | 13 (5.8)                        | 224         | 1.04 (0.48, 2.28)                | 0.921        |                     |
|           | BOOST II AUS   | 5 (1.8)                        | 279         | 3 (1.1)                         | 275         | 1.63 (0.39, 6.77)                | 0.498        |                     |
|           | <b>NeOProM</b> | <b>29 (2.4)</b>                | <b>1203</b> | <b>19 (1.6)</b>                 | <b>1197</b> | <b>1.53 (0.84, 2.78)</b>         | <b>0.166</b> |                     |
| Inborn    | SUPPORT        | 7 (1.5)                        | 479         | 6 (1.2)                         | 511         | 1.24 (0.42, 3.67)                | 0.692        | 0.222               |
|           | COT            | 17 (3.8)                       | 453         | 9 (2.0)                         | 446         | 1.83 (0.82, 4.09)                | 0.143        |                     |
|           | BOOST NZ       | 1 (0.8)                        | 132         | 1 (0.8)                         | 129         | 0.98 (0.06, 15.3)                | 0.987        |                     |
|           | BOOST II UK    | 18 (5.8)                       | 312         | 25 (7.7)                        | 323         | 0.80 (0.44, 1.46)                | 0.475        |                     |
|           | BOOST II AUS   | 11 (2.7)                       | 411         | 8 (1.9)                         | 425         | 1.42 (0.58, 3.50)                | 0.447        |                     |
|           | <b>NeOProM</b> | <b>54 (3.0)</b>                | <b>1787</b> | <b>49 (2.7)</b>                 | <b>1834</b> | <b>1.15 (0.78, 1.69)</b>         | <b>0.474</b> |                     |
| Outborn   | SUPPORT        | .                              | .           | .                               | .           | .                                | .            |                     |
|           | COT            | 1 (2.9)                        | 34          | 3 (7.0)                         | 43          | 0.43 (0.05, 3.71)                | 0.440        |                     |
|           | BOOST NZ       | 1 (10.0)                       | 10          | 0                               | 10          |                                  | ***          |                     |
|           | BOOST II UK    | 4 (10.0)                       | 40          | 7 (15.2)                        | 46          | 0.77 (0.42, 1.40)                | 0.388        |                     |
|           | BOOST II AUS   | 0                              | 34          | 1 (3.8)                         | 26          |                                  | ***          |                     |
|           | <b>NeOProM</b> | <b>6 (5.1)</b>                 | <b>118</b>  | <b>11 (8.8)</b>                 | <b>125</b>  | <b>0.64 (0.27, 1.51)</b>         | <b>0.310</b> |                     |
| Vaginal   | SUPPORT        | 2 (1.4)                        | 147         | 3 (1.7)                         | 176         | 0.84 (0.14, 4.94)                | 0.849        | 0.063               |
|           | COT            | 6 (3.3)                        | 180         | 5 (2.5)                         | 197         | 1.31 (0.41, 4.19)                | 0.647        |                     |
|           | BOOST NZ       | 2 (3.4)                        | 60          | 0                               | 62          |                                  | ***          |                     |
|           | BOOST II UK    | 13 (6.6)                       | 198         | 23 (10.5)                       | 219         | 0.64 (0.33, 1.24)                | 0.187        |                     |
|           | BOOST II AUS   | 4 (1.9)                        | 209         | 7 (3.5)                         | 199         | 0.55 (0.16, 1.82)                | 0.325        |                     |
|           | <b>NeOProM</b> | <b>27 (3.4)</b>                | <b>794</b>  | <b>38 (4.5)</b>                 | <b>853</b>  | <b>0.77 (0.47, 1.24)</b>         | <b>0.274</b> |                     |
| Caesarean | SUPPORT        | 5 (1.5)                        | 332         | 3 (0.9)                         | 335         | 1.68 (0.41, 6.97)                | 0.474        |                     |
|           | COT            | 12 (3.9)                       | 307         | 7 (2.4)                         | 291         | 1.55 (0.61, 3.96)                | 0.358        |                     |
|           | BOOST NZ       | 0                              | 82          | 1 (1.3)                         | 77          |                                  | ***          |                     |
|           | BOOST II UK    | 9 (5.8)                        | 154         | 9 (6.0)                         | 150         | 1.05 (0.43, 2.59)                | 0.915        |                     |
|           | BOOST II AUS   | 7 (3.0)                        | 234         | 2 (0.8)                         | 249         | 3.71 (0.78, 17.7)                | 0.100        |                     |
|           | <b>NeOProM</b> | <b>33 (3.0)</b>                | <b>1109</b> | <b>22 (2.0)</b>                 | <b>1102</b> | <b>1.51 (0.88, 2.60)</b>         | <b>0.135</b> |                     |
| ANS - No  | SUPPORT        | 0                              | 17          | 0                               | 24          |                                  | ***          | 0.152               |
|           | COT            | 3 (6.5)                        | 46          | 4 (9.3)                         | 43          | 0.63 (0.16, 2.46)                | 0.508        |                     |
|           | BOOST NZ       | 0                              | 16          | 0                               | 12          |                                  | ***          |                     |

eTable 14. Deafness requiring hearing aids or worse, by subgroups (continued)

|             |                | Lower Oxygen Saturation Target |             | Higher Oxygen Saturation Target |             | Adjusted* Relative Risk (95% CI) |              |                     |
|-------------|----------------|--------------------------------|-------------|---------------------------------|-------------|----------------------------------|--------------|---------------------|
| Subgroup    | Trial          | n (%)                          | N           | n (%)                           | N           | Adjusted RR                      | p-value      | interaction p-value |
|             | BOOST II UK    | 1 (4.0)                        | 25          | 3 (11.1)                        | 27          | 1.00 (0.99, 1.00)                | 0.332        |                     |
|             | BOOST II AUS   | 1 (2.1)                        | 48          | 2 (6.9)                         | 29          | 0.21 (0.04, 1.27)                | 0.089        |                     |
|             | <b>NeOProM</b> | <b>5 (3.3)</b>                 | <b>152</b>  | <b>9 (6.7)</b>                  | <b>135</b>  | <b>0.49 (0.17, 1.42)</b>         | <b>0.194</b> |                     |
| ANS - Yes   | SUPPORT        | 7 (1.5)                        | 462         | 6 (1.2)                         | 487         | 1.23 (0.42, 3.63)                | 0.708        |                     |
|             | COT            | 15 (3.4)                       | 440         | 8 (1.8)                         | 446         | 1.80 (0.76, 4.22)                | 0.179        |                     |
|             | BOOST NZ       | 2 (1.6)                        | 126         | 1 (0.8)                         | 127         | 2.01 (0.19, 21.7)                | 0.564        |                     |
|             | BOOST II UK    | 21 (6.4)                       | 326         | 29 (8.5)                        | 340         | 0.79 (0.46, 1.36)                | 0.399        |                     |
|             | BOOST II AUS   | 10 (2.5)                       | 394         | 7 (1.7)                         | 417         | 1.51 (0.58, 3.94)                | 0.397        |                     |
|             | <b>NeOProM</b> | <b>55 (3.1)</b>                | <b>1748</b> | <b>51 (2.8)</b>                 | <b>1817</b> | <b>1.13 (0.78, 1.64)</b>         | <b>0.523</b> |                     |
| Male        | SUPPORT        | 2 (0.8)                        | 240         | 4 (1.4)                         | 282         | 0.59 (0.11, 3.18)                | 0.537        | 0.094               |
|             | COT            | 15 (5.6)                       | 269         | 7 (2.8)                         | 252         | 1.98 (0.79, 4.96)                | 0.143        |                     |
|             | BOOST NZ       | 1 (1.4)                        | 71          | 0                               | 77          |                                  | ***          |                     |
|             | BOOST II UK    | 16 (8.8)                       | 181         | 21 (10.6)                       | 198         | 0.97 (0.46, 2.04)                | 0.943        |                     |
|             | BOOST II AUS   | 9 (4.1)                        | 218         | 3 (1.3)                         | 226         | 3.11 (0.85, 11.3)                | 0.085        |                     |
|             | <b>NeOProM</b> | <b>43 (4.4)</b>                | <b>979</b>  | <b>35 (3.4)</b>                 | <b>1035</b> | <b>1.32 (0.85, 2.06)</b>         | <b>0.220</b> |                     |
| Female      | SUPPORT        | 5 (2.1)                        | 239         | 2 (0.9)                         | 229         | 2.35 (0.46, 11.9)                | 0.303        |                     |
|             | COT            | 3 (1.4)                        | 218         | 5 (2.1)                         | 237         | 0.65 (0.16, 2.69)                | 0.556        |                     |
|             | BOOST NZ       | 1 (1.4)                        | 71          | 1 (1.6)                         | 62          | 0.87 (0.06, 13.5)                | 0.922        |                     |
|             | BOOST II UK    | 6 (3.5)                        | 171         | 11 (6.4)                        | 171         | 0.55 (0.21, 1.43)                | 0.218        |                     |
|             | BOOST II AUS   | 2 (0.9)                        | 227         | 6 (2.7)                         | 225         | 0.33 (0.07, 1.61)                | 0.171        |                     |
|             | <b>NeOProM</b> | <b>17 (1.8)</b>                | <b>926</b>  | <b>25 (2.7)</b>                 | <b>924</b>  | <b>0.68 (0.37, 1.24)</b>         | <b>0.208</b> |                     |
| Singleton   | SUPPORT        | 5 (1.4)                        | 355         | 5 (1.3)                         | 383         | 1.08 (0.31, 3.70)                | 0.904        | 0.820               |
|             | COT            | 11 (3.4)                       | 327         | 8 (2.4)                         | 339         | 1.43 (0.58, 3.50)                | 0.439        |                     |
|             | BOOST NZ       | 2 (1.9)                        | 105         | 1 (1.0)                         | 103         | 1.96 (0.18, 21.3)                | 0.580        |                     |
|             | BOOST II UK    | 15 (6.1)                       | 247         | 19 (7.2)                        | 263         | 0.84 (0.44, 1.62)                | 0.603        |                     |
|             | BOOST II AUS   | 8 (2.4)                        | 332         | 7 (2.0)                         | 346         | 1.19 (0.44, 3.25)                | 0.733        |                     |
|             | <b>NeOProM</b> | <b>41 (3.0)</b>                | <b>1366</b> | <b>40 (2.8)</b>                 | <b>1434</b> | <b>1.07 (0.70, 1.64)</b>         | <b>0.743</b> |                     |
| Multiple    | SUPPORT        | 2 (1.6)                        | 124         | 1 (0.8)                         | 128         | 2.06 (0.19, 22.2)                | 0.553        |                     |
|             | COT            | 7 (4.4)                        | 160         | 4 (2.7)                         | 150         | 1.60 (0.51, 5.03)                | 0.422        |                     |
|             | BOOST NZ       | 0                              | 37          | 0                               | 36          |                                  | ***          |                     |
|             | BOOST II UK    | 7 (6.7)                        | 105         | 13 (12.3)                       | 106         | 0.66 (0.29, 1.51)                | 0.327        |                     |
|             | BOOST II AUS   | 3 (2.7)                        | 113         | 2 (1.9)                         | 105         | 1.39 (0.23, 8.25)                | 0.719        |                     |
|             | <b>NeOProM</b> | <b>19 (3.5)</b>                | <b>539</b>  | <b>20 (3.8)</b>                 | <b>525</b>  | <b>0.91 (0.50, 1.72)</b>         | <b>0.823</b> |                     |
| start<6 hrs | SUPPORT        | 7 (1.5)                        | 468         | 6 (1.2)                         | 501         | 1.25 (0.42, 3.69)                | 0.688        | 0.118               |
|             | COT            | 0                              | 23          | 2 (9.5)                         | 21          |                                  | ***          |                     |
|             | BOOST NZ       | 1 (4.3)                        | 23          | 0                               | 24          |                                  | ***          |                     |
|             | BOOST II UK    |                                | .           |                                 | .           |                                  | .            |                     |
|             | BOOST II AUS   | 0                              | 44          | 3 (6.0)                         | 50          |                                  | ***          |                     |
|             | <b>NeOProM</b> | <b>8 (1.4)</b>                 | <b>558</b>  | <b>11 (1.8)</b>                 | <b>596</b>  | <b>0.76 (0.31, 1.89)</b>         | <b>0.561</b> |                     |
| >=6 hrs     | SUPPORT        | 0                              | 5           | 0                               | 4           |                                  | ***          |                     |

eTable 14. Deafness requiring hearing aids or worse, by subgroups (continued)

|                            |                | Lower Oxygen Saturation Target |             | Higher Oxygen Saturation Target |             | Adjusted* Relative Risk (95% CI) |              |                     |
|----------------------------|----------------|--------------------------------|-------------|---------------------------------|-------------|----------------------------------|--------------|---------------------|
| Subgroup                   | Trial          | n (%)                          | N           | n (%)                           | N           | Adjusted RR                      | p-value      | interaction p-value |
|                            | COT            | 18 (3.9)                       | 464         | 10 (2.1)                        | 468         | 1.84 (0.88, 3.84)                | 0.105        |                     |
|                            | BOOST NZ       | 1 (0.8)                        | 119         | 1 (0.9)                         | 115         | 0.97 (0.06, 15.1)                | 0.981        |                     |
|                            | BOOST II UK    |                                | .           |                                 | .           |                                  | .            |                     |
|                            | BOOST II AUS   | 11 (2.8)                       | 398         | 6 (1.5)                         | 401         | 1.84 (0.69, 4.95)                | 0.224        |                     |
|                            | <b>NeOProM</b> | <b>30 (3.0)</b>                | <b>986</b>  | <b>17 (1.7)</b>                 | <b>988</b>  | <b>1.78 (0.99, 3.19)</b>         | <b>0.062</b> |                     |
| Original software          | SUPPORT        | 7 (1.5)                        | 479         | 6 (1.2)                         | 511         | 1.24 (0.42, 3.67)                | 0.692        | 0.064               |
|                            | COT            | 12 (5.2)                       | 231         | 7 (3.2)                         | 220         | 1.62 (0.65, 4.04)                | 0.299        |                     |
|                            | BOOST NZ       | 2 (1.4)                        | 142         | 1 (0.7)                         | 139         | 1.96 (0.18, 21.1)                | 0.581        |                     |
|                            | BOOST II UK    | 7 (8.0)                        | 88          | 7 (8.5)                         | 82          | 1.00 (0.30, 3.36)                | 0.995        |                     |
|                            | BOOST II AUS   | 8 (2.9)                        | 278         | 3 (1.1)                         | 276         | 2.65 (0.71, 9.88)                | 0.148        |                     |
|                            | <b>NeOProM</b> | <b>36 (3.0)</b>                | <b>1218</b> | <b>24 (2.0)</b>                 | <b>1228</b> | <b>1.47 (0.87, 2.48)</b>         | <b>0.148</b> |                     |
| Revised software           | SUPPORT        |                                | .           |                                 | .           |                                  | .            |                     |
|                            | COT            | 6 (2.6)                        | 227         | 4 (1.7)                         | 232         | 1.53 (0.44, 5.39)                | 0.504        |                     |
|                            | BOOST NZ       |                                | .           |                                 | .           |                                  | .            |                     |
|                            | BOOST II UK    | 15 (5.7)                       | 264         | 25 (8.7)                        | 287         | 0.71 (0.39, 1.31)                | 0.275        |                     |
|                            | BOOST II AUS   | 3 (1.8)                        | 167         | 6 (3.4)                         | 175         | 0.52 (0.13, 2.06)                | 0.352        |                     |
|                            | <b>NeOProM</b> | <b>24 (3.6)</b>                | <b>658</b>  | <b>35 (5.0)</b>                 | <b>694</b>  | <b>0.75 (0.45, 1.25)</b>         | <b>0.273</b> |                     |
| SGA: Trialist defined - No | SUPPORT        | 7 (1.5)                        | 462         | 6 (1.3)                         | 473         | 1.19 (0.40, 3.52)                | 0.748        | 0.890               |
|                            | COT            | 16 (3.6)                       | 447         | 10 (2.2)                        | 452         | 1.62 (0.74, 3.54)                | 0.231        |                     |
|                            | BOOST II NZ    | 2 (1.6)                        | 128         | 1 (0.8)                         | 130         | 2.03 (0.19, 21.9)                | 0.560        |                     |
|                            | BOOST II UK    | 18 (6.0)                       | 298         | 28 (8.9)                        | 316         | 0.74 (0.42, 1.30)                | 0.298        |                     |
|                            | BOOST II AUS   | 10 (2.6)                       | 391         | 8 (2.0)                         | 392         | 1.25 (0.50, 3.13)                | 0.637        |                     |
|                            | <b>NeOProM</b> | <b>53 (3.1)</b>                | <b>1726</b> | <b>53 (3.0)</b>                 | <b>1763</b> | <b>1.06 (0.73, 1.54)</b>         | <b>0.775</b> |                     |
| Yes                        | SUPPORT        | 0                              | 17          | 0                               | 38          |                                  | ***          |                     |
|                            | COT            | 2 (5.0)                        | 40          | 2 (5.4)                         | 37          | 1.08 (0.25, 4.63)                | 0.915        |                     |
|                            | BOOST II NZ    | 0                              | 14          | 0                               | 9           |                                  | ***          |                     |
|                            | BOOST II UK    | 4 (7.5)                        | 53          | 4 (7.7)                         | 52          | 0.98 (0.26, 3.73)                | 0.981        |                     |
|                            | BOOST II AUS   | 1 (1.9)                        | 53          | 1 (1.7)                         | 59          | 1.11 (0.07, 17.4)                | 0.939        |                     |
|                            | <b>NeOProM</b> | <b>7 (4.0)</b>                 | <b>177</b>  | <b>7 (3.6)</b>                  | <b>195</b>  | <b>0.98 (0.36, 2.71)</b>         | <b>0.974</b> |                     |
| SGA: NeOProM defined - No  | SUPPORT        | 7 (1.7)                        | 418         | 5 (1.2)                         | 432         | 1.45 (0.46, 4.51)                | 0.526        | 0.886               |
|                            | COT            | 16 (3.6)                       | 447         | 10 (2.2)                        | 452         | 1.62 (0.74, 3.54)                | 0.231        |                     |
|                            | BOOST II NZ    | 2 (1.6)                        | 128         | 1 (0.8)                         | 130         | 2.03 (0.19, 21.9)                | 0.560        |                     |
|                            | BOOST II UK    | 19 (6.1)                       | 312         | 30 (9.0)                        | 333         | 0.72 (0.42, 1.24)                | 0.232        |                     |
|                            | BOOST II AUS   | 10 (2.6)                       | 391         | 8 (2.0)                         | 392         | 1.25 (0.50, 3.13)                | 0.637        |                     |
|                            | <b>NeOProM</b> | <b>54 (3.2)</b>                | <b>1696</b> | <b>54 (3.1)</b>                 | <b>1739</b> | <b>1.06 (0.73, 1.53)</b>         | <b>0.772</b> |                     |
| Yes                        | SUPPORT        | 0                              | 61          | 1 (1.3)                         | 79          |                                  | ***          |                     |
|                            | COT            | 2 (5.0)                        | 40          | 2 (5.4)                         | 37          | 1.08 (0.25, 4.63)                | 0.915        |                     |
|                            | BOOST II NZ    | 0                              | 14          | 0                               | 9           |                                  | ***          |                     |
|                            | BOOST II UK    | 3 (7.5)                        | 40          | 2 (5.6)                         | 36          | 1.35 (0.24, 7.66)                | 0.731        |                     |
|                            | BOOST II AUS   | 1 (1.9)                        | 53          | 1 (1.7)                         | 59          | 1.11 (0.07, 17.4)                | 0.939        |                     |
|                            | <b>NeOProM</b> | <b>6 (2.9)</b>                 | <b>208</b>  | <b>6 (2.7)</b>                  | <b>220</b>  | <b>1.11 (0.07, 17.36)</b>        | <b>0.993</b> |                     |

\* Analysis adjusted for trials and multiple births

### **Abbreviations/definitions**

CI: confidence interval; RR: relative risk; GA: gestational age; SUPPORT: Surfactant Positive Airway Pressure and Pulse Oximetry Trial; COT: Canadian Oxygen Trial; BOOST: Benefits of Oxygen Saturation Targeting; NZ: New Zealand; UK: United Kingdom; AUS: Australia; NeOProM: Neonatal Oxygenation Prospective Meta-analysis; inborn: born inside the treating center; outborn: born outside the treating center (e.g. transferred from another hospital); vaginal: mode of delivery through the vagina; Caesarean: mode of delivery via surgical procedure; ANS: antenatal corticosteroids; singleton: child born as a single birth; multiple: more than one child per birth; start<6 hrs: intervention commenced less than 6 hours after birth; start>=6 hrs: intervention commenced greater than or equal to 6 hours after birth; original software: original oximeter software; revised software: revised oximeter software; SGA: small for gestational age; SGA NeOProM defined: small for gestational age as per definition used by NeOProM collaboration, i.e. less than 10th percentile using charts from Kramer et al.<sup>1</sup>

The subgroup analysis by oximeter software type (original vs revised) excludes n=74 infants in COT who were exposed to both the original and revised software.

Empty cells (.) indicate data not collected or not applicable in this trial.

\*\*\* Low / no event rate(s) makes parameter not estimable.

eTable 15. Death prior to 18-24 months' age corrected for prematurity, by subgroups

|           |                | Lower Oxygen Saturation Target |             | Higher Oxygen Saturation Target |             | Adjusted* Relative Risk (95% CI) |              |                     |
|-----------|----------------|--------------------------------|-------------|---------------------------------|-------------|----------------------------------|--------------|---------------------|
| Subgroup  | Trial          | n (%)                          | N           | n (%)                           | N           | Adjusted RR                      | p-value      | interaction p-value |
| GA<26 wks | SUPPORT        | 91 (34.1)                      | 267         | 79 (27.9)                       | 283         | 1.24 (0.95, 1.61)                | 0.111        | 0.535               |
|           | COT            | 67 (26.2)                      | 256         | 64 (25.7)                       | 249         | 1.02 (0.76, 1.36)                | 0.885        |                     |
|           | BOOST NZ       | 21 (29.2)                      | 72          | 15 (20.8)                       | 72          | 1.38 (0.81, 2.36)                | 0.240        |                     |
|           | BOOST II UK    | 85 (39.7)                      | 214         | 65 (30.4)                       | 214         | 1.31 (1.01, 1.70)                | 0.042        |                     |
|           | BOOST II AUS   | 67 (27.9)                      | 240         | 57 (23.8)                       | 240         | 1.17 (0.86, 1.59)                | 0.306        |                     |
|           | <b>NeOProM</b> | <b>331 (31.6)</b>              | <b>1049</b> | <b>280 (26.5)</b>               | <b>1058</b> | <b>1.20 (1.05, 1.38)</b>         | <b>0.007</b> |                     |
| GA≥26 wks | SUPPORT        | 49 (13.4)                      | 366         | 39 (10.7)                       | 365         | 1.25 (0.84, 1.85)                | 0.269        |                     |
|           | COT            | 30 (9.1)                       | 329         | 24 (7.3)                        | 328         | 1.25 (0.75, 2.11)                | 0.393        |                     |
|           | BOOST NZ       | 4 (4.1)                        | 98          | 12 (12.2)                       | 98          | 0.37 (0.11, 1.21)                | 0.100        |                     |
|           | BOOST II UK    | 37 (13.7)                      | 270         | 33 (12.3)                       | 269         | 1.12 (0.71, 1.76)                | 0.634        |                     |
|           | BOOST II AUS   | 33 (10.3)                      | 321         | 30 (9.3)                        | 322         | 1.10 (0.70, 1.75)                | 0.672        |                     |
|           | <b>NeOProM</b> | <b>153 (11.1)</b>              | <b>1384</b> | <b>138 (10.0)</b>               | <b>1382</b> | <b>1.11 (0.89, 1.38)</b>         | <b>0.354</b> |                     |
| Inborn    | SUPPORT        | 140 (22.1)                     | 633         | 118 (18.2)                      | 648         | 1.24 (0.99, 1.55)                | 0.063        | 0.084               |
|           | COT            | 91 (16.7)                      | 545         | 77 (14.7)                       | 523         | 1.14 (0.87, 1.50)                | 0.329        |                     |
|           | BOOST NZ       | 24 (15.1)                      | 159         | 24 (15.3)                       | 157         | 0.96 (0.59, 1.59)                | 0.885        |                     |
|           | BOOST II UK    | 107 (25.1)                     | 427         | 85 (20.1)                       | 423         | 1.25 (0.97, 1.60)                | 0.086        |                     |
|           | BOOST II AUS   | 91 (17.6)                      | 517         | 73 (14.0)                       | 522         | 1.26 (0.95, 1.67)                | 0.110        |                     |
|           | <b>NeOProM</b> | <b>453 (19.9)</b>              | <b>2281</b> | <b>377 (16.6)</b>               | <b>2273</b> | <b>1.21 (1.07, 1.37)</b>         | <b>0.003</b> |                     |
| Outborn   | SUPPORT        | .                              | .           | .                               | .           | .                                | .            |                     |
|           | COT            | 6 (15.0)                       | 40          | 11 (20.4)                       | 54          | 0.87 (0.39, 1.92)                | 0.731        |                     |
|           | BOOST NZ       | 1 (9.1)                        | 11          | 3 (23.1)                        | 13          | 0.39 (0.05, 2.91)                | 0.361        |                     |
|           | BOOST II UK    | 15 (26.3)                      | 57          | 13 (21.7)                       | 60          | 1.17 (0.60, 2.28)                | 0.649        |                     |
|           | BOOST II AUS   | 9 (20.5)                       | 44          | 14 (35.0)                       | 40          | 0.59 (0.29, 1.20)                | 0.147        |                     |
|           | <b>NeOProM</b> | <b>31 (20.4)</b>               | <b>152</b>  | <b>41 (24.6)</b>                | <b>167</b>  | <b>0.81 (0.53, 1.23)</b>         | <b>0.325</b> |                     |
| Vaginal   | SUPPORT        | 52 (25.7)                      | 202         | 33 (15.3)                       | 216         | 1.67 (1.13, 2.49)                | 0.011        | 0.367               |
|           | COT            | 36 (16.6)                      | 217         | 36 (15.5)                       | 233         | 1.07 (0.70, 1.64)                | 0.750        |                     |
|           | BOOST NZ       | 15 (20.0)                      | 75          | 15 (19.0)                       | 79          | 1.03 (0.55, 1.90)                | 0.936        |                     |
|           | BOOST II UK    | 83 (28.5)                      | 291         | 71 (23.7)                       | 299         | 1.20 (0.91, 1.58)                | 0.201        |                     |
|           | BOOST II AUS   | 52 (19.2)                      | 271         | 43 (16.9)                       | 254         | 1.14 (0.79, 1.65)                | 0.481        |                     |
|           | <b>NeOProM</b> | <b>238 (22.5)</b>              | <b>1056</b> | <b>198 (18.3)</b>               | <b>1081</b> | <b>1.23 (1.04, 1.46)</b>         | <b>0.016</b> |                     |
| Caesarean | SUPPORT        | 88 (20.4)                      | 431         | 85 (19.7)                       | 432         | 1.05 (0.80, 1.38)                | 0.714        |                     |
|           | COT            | 59 (16.1)                      | 366         | 52 (15.2)                       | 343         | 1.07 (0.77, 1.50)                | 0.671        |                     |
|           | BOOST NZ       | 10 (10.5)                      | 95          | 12 (13.2)                       | 91          | 0.86 (0.40, 1.83)                | 0.694        |                     |
|           | BOOST II UK    | 39 (20.2)                      | 193         | 27 (14.7)                       | 184         | 1.37 (0.87, 2.16)                | 0.169        |                     |
|           | BOOST II AUS   | 48 (16.7)                      | 288         | 43 (14.1)                       | 304         | 1.17 (0.80, 1.69)                | 0.416        |                     |
|           | <b>NeOProM</b> | <b>244 (17.8)</b>              | <b>1373</b> | <b>219 (16.2)</b>               | <b>1354</b> | <b>1.11 (0.94, 1.31)</b>         | <b>0.230</b> |                     |
| ANS - No  | SUPPORT        | 3 (15.0)                       | 20          | 4 (14.3)                        | 28          | 1.06 (0.27, 4.19)                | 0.933        | 0.252               |
|           | COT            | 22 (32.4)                      | 68          | 14 (24.6)                       | 57          | 1.38 (0.80, 2.39)                | 0.244        |                     |
|           | BOOST NZ       | 4 (20.0)                       | 20          | 5 (27.8)                        | 18          | 0.40 (0.05, 3.26)                | 0.390        |                     |
|           | BOOST II UK    | 14 (35.0)                      | 40          | 18 (37.5)                       | 48          | 0.92 (0.51, 1.63)                | 0.765        |                     |

eTable 15. Death prior to 18-24 months' age corrected for prematurity, by subgroups (continued)

|             |                | Lower Oxygen Saturation Target |             | Higher Oxygen Saturation Target |             | Adjusted* Relative Risk (95% CI) |              |                     |
|-------------|----------------|--------------------------------|-------------|---------------------------------|-------------|----------------------------------|--------------|---------------------|
| Subgroup    | Trial          | n (%)                          | N           | n (%)                           | N           | Adjusted RR                      | p-value      | interaction p-value |
|             | BOOST II AUS   | 12 (19.0)                      | 63          | 11 (27.5)                       | 40          | 0.69 (0.35, 1.37)                | 0.289        |                     |
|             | <b>NeOProM</b> | <b>55 (26.1)</b>               | <b>211</b>  | <b>52 (27.2)</b>                | <b>191</b>  | <b>0.97 (0.70, 1.34)</b>         | <b>0.856</b> |                     |
| ANS - Yes   | SUPPORT        | 137 (22.3)                     | 613         | 113 (18.3)                      | 619         | 1.25 (0.99, 1.57)                | 0.056        |                     |
|             | COT            | 74 (14.4)                      | 515         | 72 (13.9)                       | 518         | 1.04 (0.78, 1.40)                | 0.778        |                     |
|             | BOOST NZ       | 21 (14.0)                      | 150         | 22 (14.5)                       | 152         | 0.96 (0.57, 1.63)                | 0.885        |                     |
|             | BOOST II UK    | 107 (24.2)                     | 442         | 80 (18.5)                       | 433         | 1.31 (1.01, 1.70)                | 0.043        |                     |
|             | BOOST II AUS   | 88 (17.8)                      | 495         | 75 (14.5)                       | 516         | 1.22 (0.92, 1.62)                | 0.160        |                     |
|             | <b>NeOProM</b> | <b>427 (19.3)</b>              | <b>2215</b> | <b>362 (16.2)</b>               | <b>2238</b> | <b>1.20 (1.06, 1.36)</b>         | <b>0.005</b> |                     |
| Male        | SUPPORT        | 82 (24.8)                      | 331         | 73 (20.0)                       | 365         | 1.25 (0.94, 1.65)                | 0.128        | 0.840               |
|             | COT            | 55 (17.0)                      | 324         | 60 (19.2)                       | 312         | 0.89 (0.64, 1.23)                | 0.465        |                     |
|             | BOOST NZ       | 18 (20.0)                      | 90          | 12 (13.3)                       | 90          | 1.52 (0.80, 2.91)                | 0.204        |                     |
|             | BOOST II UK    | 70 (27.2)                      | 257         | 54 (21.1)                       | 256         | 1.29 (0.94, 1.76)                | 0.115        |                     |
|             | BOOST II AUS   | 64 (22.1)                      | 289         | 52 (17.7)                       | 293         | 1.25 (0.89, 1.74)                | 0.193        |                     |
|             | <b>NeOProM</b> | <b>289 (22.4)</b>              | <b>1291</b> | <b>251 (19.1)</b>               | <b>1316</b> | <b>1.18 (1.02, 1.38)</b>         | <b>0.029</b> |                     |
| Female      | SUPPORT        | 58 (19.2)                      | 302         | 45 (15.9)                       | 283         | 1.23 (0.86, 1.77)                | 0.255        |                     |
|             | COT            | 42 (16.1)                      | 261         | 28 (10.6)                       | 265         | 1.52 (0.98, 2.36)                | 0.060        |                     |
|             | BOOST NZ       | 7 (8.8)                        | 80          | 15 (18.8)                       | 80          | 1.60 (0.43, 5.95)                | 0.487        |                     |
|             | BOOST II UK    | 52 (22.9)                      | 227         | 44 (19.4)                       | 227         | 1.18 (0.83, 1.69)                | 0.360        |                     |
|             | BOOST II AUS   | 36 (13.2)                      | 272         | 35 (13.0)                       | 269         | 1.04 (0.67, 1.59)                | 0.874        |                     |
|             | <b>NeOProM</b> | <b>195 (17.1)</b>              | <b>1142</b> | <b>167 (14.9)</b>               | <b>1124</b> | <b>1.16 (0.96, 1.39)</b>         | <b>0.130</b> |                     |
| Singleton   | SUPPORT        | 108 (22.8)                     | 473         | 76 (16.0)                       | 476         | 1.43 (1.10, 1.86)                | 0.008        | 0.076               |
|             | COT            | 58 (15.0)                      | 386         | 60 (15.0)                       | 399         | 1.00 (0.72, 1.39)                | 0.996        |                     |
|             | BOOST NZ       | 18 (14.5)                      | 124         | 17 (13.7)                       | 124         | 1.06 (0.57, 1.96)                | 0.855        |                     |
|             | BOOST II UK    | 91 (26.3)                      | 346         | 69 (19.9)                       | 347         | 1.32 (1.00, 1.74)                | 0.046        |                     |
|             | BOOST II AUS   | 80 (18.9)                      | 424         | 66 (15.4)                       | 429         | 1.23 (0.91, 1.65)                | 0.178        |                     |
|             | <b>NeOProM</b> | <b>355 (20.3)</b>              | <b>1753</b> | <b>288 (16.2)</b>               | <b>1775</b> | <b>1.25 (1.09, 1.44)</b>         | <b>0.002</b> |                     |
| Multiple    | SUPPORT        | 32 (20.0)                      | 160         | 42 (24.4)                       | 172         | 0.82 (0.53, 1.27)                | 0.372        |                     |
|             | COT            | 39 (19.6)                      | 199         | 28 (15.7)                       | 178         | 1.25 (0.83, 1.89)                | 0.289        |                     |
|             | BOOST NZ       | 7 (15.2)                       | 46          | 10 (21.7)                       | 46          | 0.70 (0.34, 1.44)                | 0.332        |                     |
|             | BOOST II UK    | 31 (22.5)                      | 138         | 29 (21.3)                       | 136         | 1.05 (0.66, 1.67)                | 0.828        |                     |
|             | BOOST II AUS   | 20 (14.6)                      | 137         | 21 (15.8)                       | 133         | 0.94 (0.54, 1.64)                | 0.817        |                     |
|             | <b>NeOProM</b> | <b>129 (19.0)</b>              | <b>680</b>  | <b>130 (19.5)</b>               | <b>665</b>  | <b>0.99 (0.79, 1.23)</b>         | <b>0.901</b> |                     |
| start<6 hrs | SUPPORT        | 135 (21.9)                     | 617         | 111 (17.6)                      | 631         | 1.27 (1.00, 1.60)                | 0.046        | 0.237               |
|             | COT            | 3 (11.5)                       | 26          | 4 (16.0)                        | 25          | 0.72 (0.18, 2.90)                | 0.428        |                     |
|             | BOOST NZ       | 3 (10.7)                       | 28          | 3 (10.7)                        | 28          | 1.00 (0.22, 4.54)                | 0.987        |                     |
|             | BOOST II UK    |                                | .           |                                 | .           |                                  | .            |                     |
|             | BOOST II AUS   | 13 (22.0)                      | 59          | 6 (10.0)                        | 60          | 1.78 (0.75, 4.21)                | 0.191        |                     |
|             | <b>NeOProM</b> | <b>154 (21.1)</b>              | <b>730</b>  | <b>124 (16.7)</b>               | <b>744</b>  | <b>1.28 (1.03, 1.59)</b>         | <b>0.027</b> |                     |
| >=6 hrs     | SUPPORT        | 0                              | 5           | 1 (20.0)                        | 5           |                                  | ***          |                     |
|             | COT            | 94 (16.8)                      | 559         | 84 (15.2)                       | 552         | 1.11 (0.85, 1.44)                | 0.445        |                     |
|             | BOOST NZ       | 22 (15.5)                      | 142         | 23 (16.3)                       | 141         | 0.94 (0.57, 1.55)                | 0.809        |                     |



eTable 15. Death prior to 18-24 months' age corrected for prematurity, by subgroups (continued)

|                            |                | Lower Oxygen Saturation Target |             | Higher Oxygen Saturation Target |             | Adjusted* Relative Risk (95% CI) |              |                     |
|----------------------------|----------------|--------------------------------|-------------|---------------------------------|-------------|----------------------------------|--------------|---------------------|
| Subgroup                   | Trial          | n (%)                          | N           | n (%)                           | N           | Adjusted RR                      | p-value      | interaction p-value |
|                            | BOOST II UK    |                                | .           |                                 | .           |                                  | .            |                     |
|                            | BOOST II AUS   | 87 (17.4)                      | 499         | 80 (16.0)                       | 501         | 1.09 (0.83, 1.44)                | 0.527        |                     |
|                            | <b>NeOProM</b> | <b>203 (16.8)</b>              | <b>1205</b> | <b>188 (15.7)</b>               | <b>1199</b> | <b>1.08 (0.90, 1.29)</b>         | <b>0.409</b> |                     |
| Original software          | SUPPORT        | 140 (22.1)                     | 633         | 118 (18.2)                      | 648         | 1.24 (0.99, 1.55)                | 0.063        | <b>0.034</b>        |
|                            | COT            | 49 (17.4)                      | 281         | 48 (17.9)                       | 268         | 0.99 (0.69, 1.40)                | 0.944        |                     |
|                            | BOOST NZ       | 25 (14.7)                      | 170         | 27 (15.9)                       | 170         | 0.91 (0.56, 1.46)                | 0.689        |                     |
|                            | BOOST II UK    | 21 (18.6)                      | 113         | 29 (25.4)                       | 114         | 0.70 (0.42, 1.17)                | 0.175        |                     |
|                            | BOOST II AUS   | 57 (16.5)                      | 345         | 57 (16.5)                       | 345         | 1.01 (0.72, 1.40)                | 0.961        |                     |
|                            | <b>NeOProM</b> | <b>292 (18.9)</b>              | <b>1542</b> | <b>279 (18.1)</b>               | <b>1545</b> | <b>1.06 (0.91, 1.23)</b>         | <b>0.467</b> |                     |
| Revised software           | SUPPORT        |                                | .           |                                 | .           |                                  | .            |                     |
|                            | COT            | 46 (16.8)                      | 273         | 38 (14.1)                       | 270         | 1.19 (0.80, 1.77)                | 0.380        |                     |
|                            | BOOST NZ       |                                | .           |                                 | .           |                                  | .            |                     |
|                            | BOOST II UK    | 101 (27.2)                     | 371         | 69 (18.7)                       | 369         | 1.46 (1.11, 1.91)                | 0.007        |                     |
|                            | BOOST II AUS   | 43 (19.9)                      | 216         | 30 (13.8)                       | 217         | 1.44 (0.95, 2.20)                | 0.088        |                     |
|                            | <b>NeOProM</b> | <b>190 (22.1)</b>              | <b>860</b>  | <b>137 (16.0)</b>               | <b>856</b>  | <b>1.38 (1.14, 1.68)</b>         | <b>0.001</b> |                     |
| SGA: Trialist defined - No | SUPPORT        | 116 (19.6)                     | 592         | 102 (17.2)                      | 593         | 1.16 (0.91, 1.48)                | 0.237        | 0.287               |
|                            | COT            | 83 (15.6)                      | 531         | 74 (14.1)                       | 526         | 1.11 (0.83, 1.47)                | 0.481        |                     |
|                            | BOOST II NZ    | 24 (15.7)                      | 153         | 23 (14.6)                       | 157         | 1.06 (0.63, 1.77)                | 0.834        |                     |
|                            | BOOST II UK    | 100 (24.6)                     | 407         | 79 (19.4)                       | 408         | 1.26 (0.97, 1.64)                | 0.077        |                     |
|                            | BOOST II AUS   | 75 (15.6)                      | 481         | 73 (15.1)                       | 485         | 1.04 (0.77, 1.40)                | 0.810        |                     |
|                            | <b>NeOProM</b> | <b>398 (18.4)</b>              | <b>2164</b> | <b>351 (16.2)</b>               | <b>2169</b> | <b>1.14 (1.00, 1.30)</b>         | <b>0.047</b> |                     |
| Yes                        | SUPPORT        | 24 (58.5)                      | 41          | 16 (29.1)                       | 55          | 1.99 (1.22, 3.24)                | 0.006        |                     |
|                            | COT            | 14 (25.9)                      | 54          | 14 (27.5)                       | 51          | 0.95 (0.51, 1.74)                | 0.856        |                     |
|                            | BOOST II NZ    | 1 (5.9)                        | 17          | 4 (30.8)                        | 13          | 0.18 (0.02, 1.44)                | 0.106        |                     |
|                            | BOOST II UK    | 21 (28.0)                      | 75          | 17 (23.6)                       | 72          | 1.74 (0.98, 3.09)                | 0.345        |                     |
|                            | BOOST II AUS   | 25 (31.6)                      | 79          | 14 (18.2)                       | 77          | 1.24 (0.53, 2.87)                | 0.618        |                     |
|                            | <b>NeOProM</b> | <b>85 (32.0)</b>               | <b>266</b>  | <b>65 (24.3)</b>                | <b>268</b>  | <b>1.36 (1.04, 1.78)</b>         | <b>0.033</b> |                     |
| SGA: NeOProM defined - No  | SUPPORT        | 110 (20.3)                     | 541         | 84 (15.8)                       | 533         | 1.31 (1.01, 1.70)                | 0.043        | 0.674               |
|                            | COT            | 83 (15.6)                      | 531         | 74 (14.1)                       | 526         | 1.11 (0.83, 1.47)                | 0.481        |                     |
|                            | BOOST II NZ    | 24 (15.7)                      | 153         | 23 (14.6)                       | 157         | 1.06 (0.63, 1.77)                | 0.834        |                     |
|                            | BOOST II UK    | 105 (24.6)                     | 427         | 81 (19.0)                       | 427         | 1.29 (0.99, 1.67)                | 0.055        |                     |
|                            | BOOST II AUS   | 75 (15.6)                      | 481         | 73 (15.1)                       | 485         | 1.04 (0.77, 1.40)                | 0.810        |                     |
|                            | <b>NeOProM</b> | <b>397 (18.6)</b>              | <b>2133</b> | <b>335 (15.7)</b>               | <b>2128</b> | <b>1.18 (1.04, 1.35)</b>         | <b>0.012</b> |                     |
| Yes                        | SUPPORT        | 30 (32.6)                      | 92          | 34 (29.6)                       | 115         | 1.11 (0.74, 1.68)                | 0.605        |                     |
|                            | COT            | 14 (25.9)                      | 54          | 14 (27.5)                       | 51          | 0.95 (0.51, 1.74)                | 0.856        |                     |
|                            | BOOST II NZ    | 1 (5.9)                        | 17          | 4 (30.8)                        | 13          | 0.18 (0.02, 1.44)                | 0.106        |                     |
|                            | BOOST II UK    | 17 (29.8)                      | 57          | 17 (30.4)                       | 56          | 0.93 (0.51, 1.68)                | 0.799        |                     |
|                            | BOOST II AUS   | 25 (31.6)                      | 79          | 14 (18.2)                       | 77          | 1.24 (0.53, 2.87)                | 0.618        |                     |
|                            | <b>NeOProM</b> | <b>87 (29.1)</b>               | <b>299</b>  | <b>83 (26.6)</b>                | <b>312</b>  | <b>1.08 (0.83, 1.40)</b>         | <b>0.572</b> |                     |

\* Analysis adjusted for trials and multiple births

## Abbreviations/definitions

CI: confidence interval; RR: relative risk; GA: gestational age; SUPPORT: Surfactant Positive Airway Pressure and Pulse Oximetry Trial; COT: Canadian Oxygen Trial; BOOST: Benefits of Oxygen Saturation Targeting; NZ: New Zealand; UK: United Kingdom; AUS: Australia; NeOProM: Neonatal Oxygenation Prospective Meta-analysis; inborn: born inside the treating center; outborn: born outside the treating center (e.g. transferred from another hospital); vaginal: mode of delivery through the vagina; Caesarean: mode of delivery via surgical procedure; ANS: antenatal corticosteroids; singleton: child born as a single birth; multiple: more than one child per birth; start<6 hrs: intervention commenced less than 6 hours after birth; start>=6 hrs: intervention commenced greater than or equal to 6 hours after birth; original software: original oximeter software; revised software: revised oximeter software; SGA: small for gestational age; SGA NeOProM defined: small for gestational age as per definition used by NeOProM collaboration, i.e. less than 10th percentile using charts from Kramer et al.<sup>1</sup>

The subgroup analysis by oximeter software type (original vs revised) excludes n=74 infants in COT who were exposed to both the original and revised software.

Empty cells (.) indicate data not collected or not applicable in this trial.

\*\*\* Low / no event rate(s) makes parameter not estimable.

eTable 16. Death prior to 36 weeks' postmenstrual age, by subgroups

|           |                | Lower Oxygen Saturation Target |             | Higher Oxygen Saturation Target |             | Adjusted* Relative Risk (95% CI) |              |                     |
|-----------|----------------|--------------------------------|-------------|---------------------------------|-------------|----------------------------------|--------------|---------------------|
| Subgroup  | Trial          | n (%)                          | N           | n (%)                           | N           | Adjusted RR                      | p-value      | interaction p-value |
| GA<26 wks | SUPPORT        | 75 (27.2)                      | 276         | 64 (22.1)                       | 289         | 1.25 (0.92, 1.70)                | 0.151        | 0.642               |
|           | COT            | 60 (23.1)                      | 260         | 58 (23.0)                       | 252         | 1.00 (0.73, 1.37)                | 0.979        |                     |
|           | BOOST NZ       | 15 (20.8)                      | 72          | 11 (15.3)                       | 72          | 1.40 (0.79, 2.48)                | 0.244        |                     |
|           | BOOST II UK    | 77 (36.0)                      | 214         | 61 (28.5)                       | 214         | 1.27 (0.96, 1.67)                | 0.094        |                     |
|           | BOOST II AUS   | 63 (26.1)                      | 241         | 49 (20.4)                       | 240         | 1.27 (0.91, 1.78)                | 0.154        |                     |
|           | <b>NeOProM</b> | <b>290 (27.3)</b>              | <b>1063</b> | <b>243 (22.8)</b>               | <b>1067</b> | <b>1.21 (1.04, 1.40)</b>         | <b>0.012</b> |                     |
| GA≥26 wks | SUPPORT        | 39 (10.3)                      | 378         | 30 (8.0)                        | 373         | 1.26 (0.81, 1.97)                | 0.307        |                     |
|           | COT            | 26 (7.6)                       | 342         | 22 (6.3)                        | 347         | 1.21 (0.70, 2.10)                | 0.495        |                     |
|           | BOOST NZ       | 2 (2.0)                        | 98          | 11 (11.2)                       | 98          | 0.18 (0.04, 0.77)                | 0.021        |                     |
|           | BOOST II UK    | 31 (11.5)                      | 270         | 24 (8.9)                        | 269         | 1.27 (0.75, 2.17)                | 0.372        |                     |
|           | BOOST II AUS   | 27 (8.3)                       | 327         | 24 (7.3)                        | 327         | 1.13 (0.68, 1.88)                | 0.647        |                     |
|           | <b>NeOProM</b> | <b>125 (8.8)</b>               | <b>1415</b> | <b>111 (7.9)</b>                | <b>1414</b> | <b>1.13 (0.88, 1.44)</b>         | <b>0.334</b> |                     |
| Inborn    | SUPPORT        | 114 (17.4)                     | 654         | 94 (14.2)                       | 662         | 1.25 (0.97, 1.63)                | 0.086        | 0.064               |
|           | COT            | 80 (14.2)                      | 562         | 69 (12.7)                       | 543         | 1.12 (0.84, 1.51)                | 0.436        |                     |
|           | BOOST NZ       | 16 (10.1)                      | 159         | 19 (12.1)                       | 157         | 0.84 (0.46, 1.54)                | 0.568        |                     |
|           | BOOST II UK    | 95 (22.2)                      | 427         | 73 (17.3)                       | 423         | 1.29 (0.98, 1.69)                | 0.070        |                     |
|           | BOOST II AUS   | 81 (15.5)                      | 524         | 59 (11.2)                       | 525         | 1.37 (1.00, 1.87)                | 0.047        |                     |
|           | <b>NeOProM</b> | <b>386 (16.6)</b>              | <b>2325</b> | <b>314 (13.6)</b>               | <b>2310</b> | <b>1.23 (1.07, 1.41)</b>         | <b>0.003</b> |                     |
| Outborn   | SUPPORT        | .                              | .           | .                               | .           | .                                | .            |                     |
|           | COT            | 6 (15.0)                       | 40          | 11 (19.6)                       | 56          | 0.91 (0.42, 1.99)                | 0.822        |                     |
|           | BOOST NZ       | 1 (9.1)                        | 11          | 3 (23.1)                        | 13          | 0.39 (0.05, 2.91)                | 0.361        |                     |
|           | BOOST II UK    | 13 (22.8)                      | 57          | 12 (20.0)                       | 60          | 1.09 (0.53, 2.24)                | 0.816        |                     |
|           | BOOST II AUS   | 9 (20.5)                       | 44          | 14 (33.3)                       | 42          | 0.62 (0.30, 1.27)                | 0.189        |                     |
|           | <b>NeOProM</b> | <b>29 (19.1)</b>               | <b>152</b>  | <b>40 (23.4)</b>                | <b>171</b>  | <b>0.80 (0.52, 1.23)</b>         | <b>0.299</b> |                     |
| Vaginal   | SUPPORT        | 39 (18.3)                      | 213         | 31 (14.1)                       | 220         | 1.30 (0.84, 2.00)                | 0.243        | 0.986               |
|           | COT            | 33 (14.9)                      | 222         | 34 (14.0)                       | 243         | 1.05 (0.67, 1.65)                | 0.816        |                     |
|           | BOOST NZ       | 13 (17.3)                      | 75          | 14 (17.7)                       | 79          | 0.96 (0.51, 1.81)                | 0.891        |                     |
|           | BOOST II UK    | 75 (25.8)                      | 291         | 65 (21.7)                       | 299         | 1.18 (0.88, 1.58)                | 0.273        |                     |
|           | BOOST II AUS   | 49 (18.0)                      | 272         | 38 (14.8)                       | 257         | 1.23 (0.84, 1.82)                | 0.289        |                     |
|           | <b>NeOProM</b> | <b>209 (19.5)</b>              | <b>1073</b> | <b>182 (16.6)</b>               | <b>1098</b> | <b>1.17 (0.98, 1.40)</b>         | <b>0.082</b> |                     |
| Caesarean | SUPPORT        | 75 (17.0)                      | 441         | 63 (14.3)                       | 442         | 1.22 (0.89, 1.68)                | 0.217        |                     |
|           | COT            | 51 (13.5)                      | 377         | 46 (13.0)                       | 355         | 1.04 (0.73, 1.50)                | 0.814        |                     |
|           | BOOST NZ       | 4 (4.2)                        | 95          | 8 (8.8)                         | 91          | 0.59 (0.17, 2.10)                | 0.413        |                     |
|           | BOOST II UK    | 33 (17.1)                      | 193         | 20 (10.9)                       | 184         | 1.56 (0.93, 2.63)                | 0.095        |                     |
|           | BOOST II AUS   | 41 (13.9)                      | 294         | 34 (11.1)                       | 306         | 1.22 (0.80, 1.86)                | 0.349        |                     |
|           | <b>NeOProM</b> | <b>204 (14.6)</b>              | <b>1400</b> | <b>171 (12.4)</b>               | <b>1378</b> | <b>1.18 (0.98, 1.43)</b>         | <b>0.088</b> |                     |
| ANS - No  | SUPPORT        | 1 (4.8)                        | 21          | 4 (13.8)                        | 29          | 0.35 (0.04, 2.87)                | 0.327        | 0.169               |
|           | COT            | 21 (30.0)                      | 70          | 12 (19.7)                       | 61          | 1.57 (0.86, 2.89)                | 0.144        |                     |
|           | BOOST NZ       | 4 (20.0)                       | 20          | 5 (27.8)                        | 18          | 0.40 (0.05, 3.26)                | 0.390        |                     |
|           | BOOST II UK    | 13 (32.5)                      | 40          | 18 (37.5)                       | 48          | 0.85 (0.47, 1.54)                | 0.594        |                     |

eTable 16. Death prior to 36 weeks' postmenstrual age, by subgroups (continued)

|             |                | Lower Oxygen Saturation Target |             | Higher Oxygen Saturation Target |             | Adjusted* Relative Risk (95% CI) |              |                     |
|-------------|----------------|--------------------------------|-------------|---------------------------------|-------------|----------------------------------|--------------|---------------------|
| Subgroup    | Trial          | n (%)                          | N           | n (%)                           | N           | Adjusted RR                      | p-value      | interaction p-value |
|             | BOOST II AUS   | 12 (18.8)                      | 64          | 11 (26.2)                       | 42          | 0.71 (0.35, 1.41)                | 0.324        |                     |
|             | <b>NeOProM</b> | <b>51 (23.7)</b>               | <b>215</b>  | <b>50 (25.3)</b>                | <b>198</b>  | <b>0.94 (0.67, 1.31)</b>         | <b>0.709</b> |                     |
| ANS - Yes   | SUPPORT        | 113 (17.9)                     | 633         | 89 (14.1)                       | 632         | 1.30 (1.00, 1.69)                | 0.051        |                     |
|             | COT            | 64 (12.1)                      | 530         | 66 (12.3)                       | 536         | 0.98 (0.72, 1.35)                | 0.922        |                     |
|             | BOOST NZ       | 13 (8.7)                       | 150         | 17 (11.2)                       | 152         | 0.79 (0.41, 1.53)                | 0.482        |                     |
|             | BOOST II UK    | 95 (21.5)                      | 442         | 67 (15.5)                       | 433         | 1.38 (1.04, 1.84)                | 0.026        |                     |
|             | BOOST II AUS   | 78 (15.6)                      | 501         | 61 (11.8)                       | 519         | 1.32 (0.97, 1.80)                | 0.078        |                     |
|             | <b>NeOProM</b> | <b>363 (16.1)</b>              | <b>2256</b> | <b>300 (13.2)</b>               | <b>2272</b> | <b>1.23 (1.06, 1.41)</b>         | <b>0.005</b> |                     |
| Male        | SUPPORT        | 67 (19.6)                      | 341         | 57 (15.4)                       | 371         | 1.29 (0.93, 1.79)                | 0.131        | 0.814               |
|             | COT            | 49 (14.9)                      | 329         | 55 (16.9)                       | 326         | 0.88 (0.62, 1.25)                | 0.483        |                     |
|             | BOOST NZ       | 12 (13.3)                      | 90          | 10 (11.1)                       | 90          | 1.21 (0.55, 2.63)                | 0.634        |                     |
|             | BOOST II UK    | 59 (23.0)                      | 257         | 44 (17.2)                       | 256         | 1.33 (0.93, 1.89)                | 0.115        |                     |
|             | BOOST II AUS   | 58 (19.8)                      | 293         | 44 (14.9)                       | 296         | 1.33 (0.92, 1.90)                | 0.125        |                     |
|             | <b>NeOProM</b> | <b>245 (18.7)</b>              | <b>1310</b> | <b>210 (15.7)</b>               | <b>1339</b> | <b>1.20 (1.01, 1.42)</b>         | <b>0.037</b> |                     |
| Female      | SUPPORT        | 47 (15.0)                      | 313         | 37 (12.7)                       | 291         | 1.22 (0.81, 1.84)                | 0.341        |                     |
|             | COT            | 37 (13.6)                      | 273         | 25 (9.2)                        | 273         | 1.48 (0.93, 2.37)                | 0.101        |                     |
|             | BOOST NZ       | 5 (6.3)                        | 80          | 12 (15.0)                       | 80          | 0.50 (0.15, 1.61)                | 0.245        |                     |
|             | BOOST II UK    | 49 (21.6)                      | 227         | 41 (18.1)                       | 227         | 1.20 (0.82, 1.74)                | 0.350        |                     |
|             | BOOST II AUS   | 32 (11.6)                      | 275         | 29 (10.7)                       | 271         | 1.10 (0.69, 1.76)                | 0.677        |                     |
|             | <b>NeOProM</b> | <b>170 (14.6)</b>              | <b>1168</b> | <b>144 (12.6)</b>               | <b>1142</b> | <b>1.16 (0.94, 1.42)</b>         | <b>0.156</b> |                     |
| Singleton   | SUPPORT        | 85 (17.2)                      | 493         | 57 (11.7)                       | 486         | 1.47 (1.08, 2.01)                | 0.015        | 0.058               |
|             | COT            | 51 (12.9)                      | 396         | 53 (12.7)                       | 417         | 1.01 (0.71, 1.45)                | 0.943        |                     |
|             | BOOST NZ       | 12 (9.7)                       | 124         | 14 (11.3)                       | 124         | 0.86 (0.41, 1.78)                | 0.679        |                     |
|             | BOOST II UK    | 80 (23.1)                      | 346         | 57 (16.4)                       | 347         | 1.41 (1.04, 1.91)                | 0.028        |                     |
|             | BOOST II AUS   | 71 (16.5)                      | 430         | 55 (12.7)                       | 432         | 1.30 (0.94, 1.80)                | 0.118        |                     |
|             | <b>NeOProM</b> | <b>299 (16.7)</b>              | <b>1789</b> | <b>236 (13.1)</b>               | <b>1806</b> | <b>1.28 (1.10, 1.50)</b>         | <b>0.002</b> |                     |
| Multiple    | SUPPORT        | 29 (18.0)                      | 161         | 37 (21.0)                       | 176         | 0.86 (0.54, 1.37)                | 0.520        |                     |
|             | COT            | 35 (17.0)                      | 206         | 27 (14.8)                       | 182         | 1.14 (0.74, 1.77)                | 0.552        |                     |
|             | BOOST NZ       | 5 (10.9)                       | 46          | 8 (17.4)                        | 46          | 0.67 (0.28, 1.59)                | 0.362        |                     |
|             | BOOST II UK    | 28 (20.3)                      | 138         | 28 (20.6)                       | 136         | 0.98 (0.61, 1.58)                | 0.947        |                     |
|             | BOOST II AUS   | 19 (13.8)                      | 138         | 18 (13.3)                       | 135         | 1.04 (0.58, 1.86)                | 0.906        |                     |
|             | <b>NeOProM</b> | <b>116 (16.8)</b>              | <b>689</b>  | <b>118 (17.5)</b>               | <b>675</b>  | <b>0.97 (0.77, 1.23)</b>         | <b>0.827</b> |                     |
| start<6 hrs | SUPPORT        | 109 (17.1)                     | 638         | 87 (13.5)                       | 645         | 1.29 (0.99, 1.69)                | 0.061        | 0.164               |
|             | COT            | 3 (11.1)                       | 27          | 3 (11.5)                        | 26          | 0.96 (0.21, 4.35)                | 0.733        |                     |
|             | BOOST NZ       | 3 (10.7)                       | 28          | 1 (3.6)                         | 28          | 2.80 (0.50, 15.7)                | 0.240        |                     |
|             | BOOST II UK    |                                | .           |                                 | .           |                                  | .            |                     |
|             | BOOST II AUS   | 11 (18.6)                      | 59          | 5 (8.3)                         | 60          | 1.55 (0.57, 4.20)                | 0.391        |                     |
|             | <b>NeOProM</b> | <b>126 (16.8)</b>              | <b>752</b>  | <b>96 (12.6)</b>                | <b>759</b>  | <b>1.34 (1.04, 1.73)</b>         | <b>0.023</b> |                     |
| >=6 hrs     | SUPPORT        | 0                              | 5           | 1 (20.0)                        | 5           |                                  | ***          |                     |
|             | COT            | 83 (14.4)                      | 575         | 77 (13.4)                       | 573         | 1.07 (0.81, 1.43)                | 0.619        |                     |
|             | BOOST NZ       | 14 (9.9)                       | 142         | 20 (14.2)                       | 141         | 0.70 (0.38, 1.29)                | 0.254        |                     |

eTable 16. Death prior to 36 weeks' postmenstrual age, by subgroups (continued)

|                            |                | Lower Oxygen Saturation Target |             | Higher Oxygen Saturation Target |             | Adjusted* Relative Risk (95% CI) |              |                     |
|----------------------------|----------------|--------------------------------|-------------|---------------------------------|-------------|----------------------------------|--------------|---------------------|
| Subgroup                   | Trial          | n (%)                          | N           | n (%)                           | N           | Adjusted RR                      | p-value      | interaction p-value |
|                            | BOOST II UK    |                                | .           |                                 | .           |                                  | .            |                     |
|                            | BOOST II AUS   | 79 (15.6)                      | 506         | 67 (13.2)                       | 506         | 1.18 (0.87, 1.59)                | 0.284        |                     |
|                            | <b>NeOProM</b> | <b>176 (14.3)</b>              | <b>1228</b> | <b>165 (13.5)</b>               | <b>1225</b> | <b>1.07 (0.88, 1.30)</b>         | <b>0.515</b> |                     |
| Original software          | SUPPORT        | 114 (17.4)                     | 654         | 94 (14.2)                       | 662         | 1.25 (0.97, 1.63)                | 0.086        | <b>0.020</b>        |
|                            | COT            | 45 (15.7)                      | 286         | 45 (16.2)                       | 278         | 0.99 (0.68, 1.43)                | 0.951        |                     |
|                            | BOOST NZ       | 17 (10.0)                      | 170         | 22 (12.9)                       | 170         | 0.78 (0.44, 1.38)                | 0.396        |                     |
|                            | BOOST II UK    | 18 (15.9)                      | 113         | 26 (22.8)                       | 114         | 0.66 (0.38, 1.16)                | 0.151        |                     |
|                            | BOOST II AUS   | 50 (14.5)                      | 346         | 50 (14.5)                       | 346         | 1.00 (0.70, 1.44)                | 0.982        |                     |
|                            | <b>NeOProM</b> | <b>244 (15.6)</b>              | <b>1569</b> | <b>237 (15.1)</b>               | <b>1570</b> | <b>1.03 (0.88, 1.22)</b>         | <b>0.687</b> |                     |
| Revised software           | SUPPORT        |                                | .           |                                 | .           |                                  | .            |                     |
|                            | COT            | 39 (13.7)                      | 284         | 35 (12.5)                       | 279         | 1.10 (0.72, 1.68)                | 0.672        |                     |
|                            | BOOST NZ       |                                | .           |                                 | .           |                                  | .            |                     |
|                            | BOOST II UK    | 90 (24.3)                      | 371         | 59 (16.0)                       | 369         | 1.52 (1.13, 2.04)                | 0.006        |                     |
|                            | BOOST II AUS   | 40 (18.0)                      | 222         | 23 (10.4)                       | 221         | 1.73 (1.08, 2.77)                | 0.022        |                     |
|                            | <b>NeOProM</b> | <b>169 (19.3)</b>              | <b>877</b>  | <b>117 (13.5)</b>               | <b>869</b>  | <b>1.43 (1.16, 1.78)</b>         | <b>0.001</b> |                     |
| SGA: Trialist defined - No | SUPPORT        | 96 (15.7)                      | 613         | 82 (13.5)                       | 607         | 1.18 (0.89, 1.57)                | 0.237        | 0.274               |
|                            | COT            | 74 (13.5)                      | 548         | 68 (12.4)                       | 548         | 1.08 (0.80, 1.47)                | 0.612        |                     |
|                            | BOOST II NZ    | 17 (11.1)                      | 153         | 20 (12.7)                       | 157         | 0.87 (0.48, 1.59)                | 0.660        |                     |
|                            | BOOST II UK    | 90 (22.1)                      | 407         | 72 (17.6)                       | 408         | 1.24 (0.94, 1.64)                | 0.121        |                     |
|                            | BOOST II AUS   | 71 (14.6)                      | 487         | 62 (12.7)                       | 489         | 1.15 (0.84, 1.58)                | 0.389        |                     |
|                            | <b>NeOProM</b> | <b>348 (15.8)</b>              | <b>2208</b> | <b>304 (13.8)</b>               | <b>2209</b> | <b>1.15 (1.00, 1.32)</b>         | <b>0.057</b> |                     |
| Yes                        | SUPPORT        | 18 (43.9)                      | 41          | 12 (21.8)                       | 55          | 2.00 (1.09, 3.67)                | 0.026        |                     |
|                            | COT            | 12 (22.2)                      | 54          | 12 (23.5)                       | 51          | 0.94 (0.48, 1.87)                | 0.870        |                     |
|                            | BOOST II NZ    | 0                              | 17          | 2 (15.4)                        | 13          | 0.16 (0.01, 2.99)                | 0.675        |                     |
|                            | BOOST II UK    | 17 (22.7)                      | 75          | 11 (15.3)                       | 72          | 1.48 (0.75, 2.95)                | 0.238        |                     |
|                            | BOOST II AUS   | 19 (23.8)                      | 80          | 11 (14.1)                       | 78          | 1.68 (0.86, 3.30)                | 0.558        |                     |
|                            | <b>NeOProM</b> | <b>66 (24.7)</b>               | <b>267</b>  | <b>48 (17.8)</b>                | <b>269</b>  | <b>1.43 (1.03, 1.97)</b>         | <b>0.032</b> |                     |
| SGA: NeOProM defined - No  | SUPPORT        | 90 (16.1)                      | 560         | 71 (13.0)                       | 546         | 1.25 (0.93, 1.67)                | 0.135        | 0.722               |
|                            | COT            | 74 (13.5)                      | 548         | 68 (12.4)                       | 548         | 1.08 (0.80, 1.47)                | 0.612        |                     |
|                            | BOOST II NZ    | 17 (11.1)                      | 153         | 20 (12.7)                       | 157         | 0.87 (0.48, 1.59)                | 0.660        |                     |
|                            | BOOST II UK    | 94 (22.0)                      | 427         | 74 (17.3)                       | 427         | 1.26 (0.96, 1.66)                | 0.103        |                     |
|                            | BOOST II AUS   | 71 (14.6)                      | 487         | 62 (12.7)                       | 489         | 1.15 (0.84, 1.58)                | 0.389        |                     |
|                            | <b>NeOProM</b> | <b>346 (15.9)</b>              | <b>2175</b> | <b>295 (13.6)</b>               | <b>2167</b> | <b>1.17 (1.01, 1.35)</b>         | <b>0.033</b> |                     |
| Yes                        | SUPPORT        | 24 (25.5)                      | 94          | 23 (19.8)                       | 116         | 1.32 (0.79, 2.20)                | 0.285        |                     |
|                            | COT            | 12 (22.2)                      | 54          | 12 (23.5)                       | 51          | 0.94 (0.48, 1.87)                | 0.870        |                     |
|                            | BOOST II NZ    | 0                              | 17          | 2 (15.4)                        | 13          | 0.16 (0.01, 2.99)                | 0.675        |                     |
|                            | BOOST II UK    | 14 (24.6)                      | 57          | 11 (19.6)                       | 56          | 1.25 (0.62, 2.51)                | 0.421        |                     |
|                            | BOOST II AUS   | 19 (23.8)                      | 80          | 11 (14.1)                       | 78          | 1.68 (0.86, 3.30)                | 0.558        |                     |
|                            | <b>NeOProM</b> | <b>69 (22.8)</b>               | <b>302</b>  | <b>59 (18.8)</b>                | <b>314</b>  | <b>1.23 (0.90, 1.67)</b>         | <b>0.194</b> |                     |

\* Analysis adjusted for trials and multiple births

## Abbreviations/definitions

CI: confidence interval; RR: relative risk; GA: gestational age; SUPPORT: Surfactant Positive Airway Pressure and Pulse Oximetry Trial; COT: Canadian Oxygen Trial; BOOST: Benefits of Oxygen Saturation Targeting; NZ: New Zealand; UK: United Kingdom; AUS: Australia; NeOProM: Neonatal Oxygenation Prospective Meta-analysis; inborn: born inside the treating center; outborn: born outside the treating center (e.g. transferred from another hospital); vaginal: mode of delivery through the vagina; Caesarean: mode of delivery via surgical procedure; ANS: antenatal corticosteroids; singleton: child born as a single birth; multiple: more than one child per birth; start<6 hrs: intervention commenced less than 6 hours after birth; start>=6 hrs: intervention commenced greater than or equal to 6 hours after birth; original software: original oximeter software; revised software: revised oximeter software; SGA: small for gestational age; SGA NeOProM defined: small for gestational age as per definition used by NeOProM collaboration, i.e. less than 10th percentile using charts from Kramer et al.<sup>1</sup>

The subgroup analysis by oximeter software type (original vs revised) excludes n=74 infants in COT who were exposed to both the original and revised software.

Empty cells (.) indicate data not collected or not applicable in this trial.

\*\*\* Low / no event rate(s) makes parameter not estimable.

eTable 17. Death prior to discharge, by subgroups

|           |                | Lower Oxygen Saturation Target |             | Higher Oxygen Saturation Target |             | Adjusted* Relative Risk (95% CI) |              |                     |
|-----------|----------------|--------------------------------|-------------|---------------------------------|-------------|----------------------------------|--------------|---------------------|
| Subgroup  | Trial          | n (%)                          | N           | n (%)                           | N           | Adjusted RR                      | p-value      | interaction p-value |
| GA<26 wks | SUPPORT        | 85 (30.8)                      | 276         | 73 (25.3)                       | 289         | 1.24 (0.94, 1.64)                | 0.127        | 0.729               |
|           | COT            | 66 (25.4)                      | 260         | 63 (25.0)                       | 252         | 1.02 (0.76, 1.37)                | 0.892        |                     |
|           | BOOST NZ       | 17 (23.6)                      | 72          | 13 (18.1)                       | 72          | 1.31 (0.76, 2.26)                | 0.322        |                     |
|           | BOOST II UK    | 80 (37.4)                      | 214         | 64 (29.9)                       | 214         | 1.26 (0.96, 1.64)                | 0.097        |                     |
|           | BOOST II AUS   | 66 (27.4)                      | 241         | 55 (22.9)                       | 240         | 1.19 (0.87, 1.63)                | 0.268        |                     |
|           | <b>NeOProM</b> | <b>314 (29.5)</b>              | <b>1063</b> | <b>268 (25.1)</b>               | <b>1067</b> | <b>1.19 (1.03, 1.37)</b>         | <b>0.015</b> |                     |
| GA≥26 wks | SUPPORT        | 45 (11.9)                      | 378         | 34 (9.1)                        | 373         | 1.28 (0.85, 1.94)                | 0.241        |                     |
|           | COT            | 29 (8.5)                       | 342         | 24 (6.9)                        | 347         | 1.24 (0.74, 2.09)                | 0.421        |                     |
|           | BOOST NZ       | 4 (4.1)                        | 98          | 11 (11.2)                       | 98          | 0.40 (0.11, 1.38)                | 0.145        |                     |
|           | BOOST II UK    | 35 (13.0)                      | 270         | 32 (11.9)                       | 269         | 1.09 (0.68, 1.74)                | 0.725        |                     |
|           | BOOST II AUS   | 33 (10.1)                      | 327         | 28 (8.6)                        | 327         | 1.18 (0.74, 1.88)                | 0.492        |                     |
|           | <b>NeOProM</b> | <b>146 (10.3)</b>              | <b>1415</b> | <b>129 (9.1)</b>                | <b>1414</b> | <b>1.13 (0.90, 1.42)</b>         | <b>0.282</b> |                     |
| Inborn    | SUPPORT        | 130 (19.9)                     | 654         | 107 (16.2)                      | 662         | 1.26 (0.99, 1.60)                | 0.060        | 0.054               |
|           | COT            | 89 (15.8)                      | 562         | 76 (14.0)                       | 543         | 1.14 (0.87, 1.50)                | 0.354        |                     |
|           | BOOST NZ       | 20 (12.6)                      | 159         | 21 (13.4)                       | 157         | 0.95 (0.56, 1.61)                | 0.855        |                     |
|           | BOOST II UK    | 102 (23.9)                     | 427         | 83 (19.6)                       | 423         | 1.22 (0.94, 1.57)                | 0.135        |                     |
|           | BOOST II AUS   | 90 (17.2)                      | 524         | 69 (13.1)                       | 525         | 1.31 (0.98, 1.74)                | 0.069        |                     |
|           | <b>NeOProM</b> | <b>431 (18.5)</b>              | <b>2326</b> | <b>356 (15.4)</b>               | <b>2310</b> | <b>1.21 (1.07, 1.38)</b>         | <b>0.003</b> |                     |
| Outborn   | SUPPORT        | .                              | .           | .                               | .           | .                                | .            |                     |
|           | COT            | 6 (15.0)                       | 40          | 11 (19.6)                       | 56          | 0.91 (0.42, 1.99)                | 0.822        |                     |
|           | BOOST NZ       | 1 (9.1)                        | 11          | 3 (23.1)                        | 13          | 0.39 (0.05, 2.91)                | 0.361        |                     |
|           | BOOST II UK    | 13 (22.8)                      | 57          | 13 (21.7)                       | 60          | 1.01 (0.50, 2.03)                | 0.977        |                     |
|           | BOOST II AUS   | 9 (20.5)                       | 44          | 14 (33.3)                       | 42          | 0.62 (0.30, 1.27)                | 0.189        |                     |
|           | <b>NeOProM</b> | <b>29 (19.1)</b>               | <b>152</b>  | <b>41 (24.0)</b>                | <b>171</b>  | <b>0.78 (0.51, 1.19)</b>         | <b>0.248</b> |                     |
| Vaginal   | SUPPORT        | 44 (20.7)                      | 213         | 33 (15.0)                       | 220         | 1.37 (0.91, 2.08)                | 0.131        | 0.803               |
|           | COT            | 36 (16.2)                      | 222         | 36 (14.8)                       | 243         | 1.09 (0.71, 1.67)                | 0.687        |                     |
|           | BOOST NZ       | 13 (17.3)                      | 75          | 14 (17.7)                       | 79          | 0.96 (0.51, 1.81)                | 0.891        |                     |
|           | BOOST II UK    | 79 (27.1)                      | 291         | 69 (23.1)                       | 299         | 1.17 (0.88, 1.56)                | 0.269        |                     |
|           | BOOST II AUS   | 52 (19.1)                      | 272         | 42 (16.3)                       | 257         | 1.18 (0.81, 1.71)                | 0.388        |                     |
|           | <b>NeOProM</b> | <b>224 (20.9)</b>              | <b>1073</b> | <b>194 (17.7)</b>               | <b>1098</b> | <b>1.18 (0.99, 1.40)</b>         | <b>0.062</b> |                     |
| Caesarean | SUPPORT        | 86 (19.5)                      | 441         | 74 (16.7)                       | 442         | 1.19 (0.89, 1.59)                | 0.239        |                     |
|           | COT            | 57 (15.1)                      | 377         | 51 (14.4)                       | 355         | 1.06 (0.75, 1.49)                | 0.740        |                     |
|           | BOOST NZ       | 8 (8.4)                        | 95          | 10 (11.0)                       | 91          | 1.01 (0.45, 2.27)                | 0.980        |                     |
|           | BOOST II UK    | 36 (18.7)                      | 193         | 27 (14.7)                       | 184         | 1.26 (0.80, 2.01)                | 0.319        |                     |
|           | BOOST II AUS   | 47 (16.0)                      | 294         | 40 (13.1)                       | 306         | 1.21 (0.82, 1.78)                | 0.332        |                     |
|           | <b>NeOProM</b> | <b>234 (16.7)</b>              | <b>1400</b> | <b>202 (14.7)</b>               | <b>1378</b> | <b>1.15 (0.97, 1.36)</b>         | <b>0.115</b> |                     |
| ANS - No  | SUPPORT        | 3 (14.3)                       | 21          | 4 (13.8)                        | 29          | 1.04 (0.26, 4.14)                | 0.951        | 0.232               |
|           | COT            | 22 (31.4)                      | 70          | 14 (23.0)                       | 61          | 1.44 (0.83, 2.49)                | 0.198        |                     |
|           | BOOST NZ       | 4 (20.0)                       | 20          | 5 (27.8)                        | 18          | 0.40 (0.05, 3.26)                | 0.390        |                     |
|           | BOOST II UK    | 13 (32.5)                      | 40          | 18 (37.5)                       | 48          | 0.85 (0.47, 1.54)                | 0.594        |                     |

eTable 17. Death prior to discharge, by subgroups (continued)

|             |                | Lower Oxygen Saturation Target |             | Higher Oxygen Saturation Target |             | Adjusted* Relative Risk (95% CI) |              |                     |
|-------------|----------------|--------------------------------|-------------|---------------------------------|-------------|----------------------------------|--------------|---------------------|
| Subgroup    | Trial          | n (%)                          | N           | n (%)                           | N           | Adjusted RR                      | p-value      | interaction p-value |
|             | BOOST II AUS   | 12 (18.8)                      | 64          | 11 (26.2)                       | 42          | 0.71 (0.35, 1.41)                | 0.324        |                     |
|             | <b>NeOProM</b> | <b>54 (25.1)</b>               | <b>215</b>  | <b>52 (26.3)</b>                | <b>198</b>  | <b>0.96 (0.70, 1.34)</b>         | <b>0.823</b> |                     |
| ANS - Yes   | SUPPORT        | 127 (20.1)                     | 633         | 102 (16.1)                      | 632         | 1.27 (1.00, 1.63)                | 0.052        |                     |
|             | COT            | 72 (13.6)                      | 530         | 71 (13.2)                       | 536         | 1.03 (0.77, 1.39)                | 0.836        |                     |
|             | BOOST NZ       | 17 (11.3)                      | 150         | 19 (12.5)                       | 152         | 0.94 (0.53, 1.65)                | 0.820        |                     |
|             | BOOST II UK    | 101 (22.9)                     | 442         | 78 (18.0)                       | 433         | 1.26 (0.97, 1.65)                | 0.084        |                     |
|             | BOOST II AUS   | 87 (17.4)                      | 501         | 71 (13.7)                       | 519         | 1.27 (0.95, 1.69)                | 0.104        |                     |
|             | <b>NeOProM</b> | <b>404 (17.9)</b>              | <b>2256</b> | <b>341 (15.0)</b>               | <b>2272</b> | <b>1.20 (1.05, 1.37)</b>         | <b>0.007</b> |                     |
| Male        | SUPPORT        | 78 (22.9)                      | 341         | 66 (17.8)                       | 371         | 1.30 (0.96, 1.75)                | 0.086        | 0.648               |
|             | COT            | 54 (16.4)                      | 329         | 59 (18.1)                       | 326         | 0.91 (0.66, 1.26)                | 0.577        |                     |
|             | BOOST NZ       | 15 (16.7)                      | 90          | 11 (12.2)                       | 90          | 1.38 (0.68, 2.80)                | 0.371        |                     |
|             | BOOST II UK    | 65 (25.3)                      | 257         | 52 (20.3)                       | 256         | 1.24 (0.90, 1.72)                | 0.193        |                     |
|             | BOOST II AUS   | 64 (21.8)                      | 293         | 49 (16.6)                       | 296         | 1.32 (0.94, 1.85)                | 0.111        |                     |
|             | <b>NeOProM</b> | <b>276 (21.1)</b>              | <b>1310</b> | <b>237 (17.7)</b>               | <b>1339</b> | <b>1.20 (1.02, 1.40)</b>         | <b>0.024</b> |                     |
| Female      | SUPPORT        | 52 (16.6)                      | 313         | 41 (14.1)                       | 291         | 1.21 (0.83, 1.78)                | 0.327        |                     |
|             | COT            | 41 (15.0)                      | 273         | 28 (10.3)                       | 273         | 1.47 (0.94, 2.28)                | 0.090        |                     |
|             | BOOST NZ       | 6 (7.5)                        | 80          | 13 (16.3)                       | 80          | 2.71 (0.27, 27.5)                | 0.399        |                     |
|             | BOOST II UK    | 50 (22.0)                      | 227         | 44 (19.4)                       | 227         | 1.14 (0.79, 1.64)                | 0.488        |                     |
|             | BOOST II AUS   | 35 (12.7)                      | 275         | 34 (12.5)                       | 271         | 1.03 (0.67, 1.59)                | 0.889        |                     |
|             | <b>NeOProM</b> | <b>184 (15.8)</b>              | <b>1168</b> | <b>160 (14.0)</b>               | <b>1142</b> | <b>1.13 (0.93, 1.37)</b>         | <b>0.208</b> |                     |
| Singleton   | SUPPORT        | 100 (20.3)                     | 493         | 67 (13.8)                       | 486         | 1.47 (1.11, 1.95)                | 0.007        | 0.071               |
|             | COT            | 57 (14.4)                      | 396         | 59 (14.1)                       | 417         | 1.02 (0.73, 1.43)                | 0.920        |                     |
|             | BOOST NZ       | 14 (11.3)                      | 124         | 16 (12.9)                       | 124         | 0.87 (0.45, 1.71)                | 0.697        |                     |
|             | BOOST II UK    | 86 (24.9)                      | 346         | 67 (19.3)                       | 347         | 1.29 (0.97, 1.71)                | 0.080        |                     |
|             | BOOST II AUS   | 79 (18.4)                      | 430         | 62 (14.4)                       | 432         | 1.28 (0.94, 1.74)                | 0.112        |                     |
|             | <b>NeOProM</b> | <b>336 (18.8)</b>              | <b>1789</b> | <b>271 (15.0)</b>               | <b>1806</b> | <b>1.25 (1.08, 1.45)</b>         | <b>0.002</b> |                     |
| Multiple    | SUPPORT        | 30 (18.6)                      | 161         | 40 (22.7)                       | 176         | 0.82 (0.53, 1.29)                | 0.392        |                     |
|             | COT            | 38 (18.4)                      | 206         | 28 (15.4)                       | 182         | 1.20 (0.79, 1.82)                | 0.389        |                     |
|             | BOOST NZ       | 7 (15.2)                       | 46          | 8 (17.4)                        | 46          | 0.91 (0.47, 1.79)                | 0.788        |                     |
|             | BOOST II UK    | 29 (21.0)                      | 138         | 29 (21.3)                       | 136         | 0.98 (0.62, 1.57)                | 0.947        |                     |
|             | BOOST II AUS   | 20 (14.5)                      | 138         | 21 (15.6)                       | 135         | 0.94 (0.54, 1.65)                | 0.834        |                     |
|             | <b>NeOProM</b> | <b>124 (18.0)</b>              | <b>689</b>  | <b>126 (18.7)</b>               | <b>675</b>  | <b>0.98 (0.78, 1.22)</b>         | <b>0.853</b> |                     |
| start<6 hrs | SUPPORT        | 125 (19.6)                     | 638         | 100 (15.5)                      | 645         | 1.29 (1.01, 1.65)                | 0.043        | 0.169               |
|             | COT            | 3 (11.1)                       | 27          | 3 (11.5)                        | 26          | 0.96 (0.21, 4.35)                | 0.932        |                     |
|             | BOOST NZ       | 3 (10.7)                       | 28          | 2 (7.1)                         | 28          | 1.47 (0.30, 7.07)                | 0.633        |                     |
|             | BOOST II UK    |                                | .           |                                 | .           |                                  | .            |                     |
|             | BOOST II AUS   | 13 (22.0)                      | 59          | 6 (10.0)                        | 60          | 1.78 (0.75, 4.21)                | 0.191        |                     |
|             | <b>NeOProM</b> | <b>144 (19.1)</b>              | <b>752</b>  | <b>111 (14.6)</b>               | <b>759</b>  | <b>1.33 (1.05, 1.68)</b>         | <b>0.016</b> |                     |
| >=6 hrs     | SUPPORT        | 0                              | 5           | 1 (20.0)                        | 5           |                                  | ***          |                     |
|             | COT            | 92 (16.0)                      | 575         | 84 (14.7)                       | 573         | 1.09 (0.84, 1.43)                | 0.512        |                     |
|             | BOOST NZ       | 18 (12.7)                      | 142         | 21 (14.9)                       | 141         | 0.86 (0.51, 1.46)                | 0.573        |                     |



eTable 17. Death prior to discharge, by subgroups (continued)

|                            |                | Lower Oxygen Saturation Target |             | Higher Oxygen Saturation Target |             | Adjusted* Relative Risk (95% CI) |              |                     |
|----------------------------|----------------|--------------------------------|-------------|---------------------------------|-------------|----------------------------------|--------------|---------------------|
| Subgroup                   | Trial          | n (%)                          | N           | n (%)                           | N           | Adjusted RR                      | p-value      | interaction p-value |
|                            | BOOST II UK    |                                | .           |                                 | .           |                                  | .            |                     |
|                            | BOOST II AUS   | 86 (17.0)                      | 506         | 76 (15.0)                       | 506         | 1.13 (0.85, 1.51)                | 0.389        |                     |
|                            | <b>NeOProM</b> | <b>196 (16.0)</b>              | <b>1228</b> | <b>182 (14.9)</b>               | <b>1225</b> | <b>1.08 (0.90, 1.29)</b>         | <b>0.419</b> |                     |
| Original software          | SUPPORT        | 130 (19.9)                     | 654         | 107 (16.2)                      | 662         | 1.26 (0.99, 1.60)                | 0.060        | 0.040               |
|                            | COT            | 48 (16.8)                      | 286         | 48 (17.3)                       | 278         | 0.98 (0.69, 1.40)                | 0.925        |                     |
|                            | BOOST NZ       | 21 (12.4)                      | 170         | 24 (14.1)                       | 170         | 0.89 (0.54, 1.47)                | 0.643        |                     |
|                            | BOOST II UK    | 20 (17.7)                      | 113         | 29 (25.4)                       | 114         | 0.67 (0.40, 1.12)                | 0.129        |                     |
|                            | BOOST II AUS   | 57 (16.5)                      | 346         | 56 (16.2)                       | 346         | 1.03 (0.74, 1.43)                | 0.880        |                     |
|                            | <b>NeOProM</b> | <b>276 (17.6)</b>              | <b>1569</b> | <b>264 (16.8)</b>               | <b>1570</b> | <b>1.05 (0.90, 1.23)</b>         | <b>0.503</b> |                     |
| Revised software           | SUPPORT        |                                | .           |                                 | .           |                                  | .            |                     |
|                            | COT            | 45 (15.8)                      | 284         | 37 (13.3)                       | 279         | 1.19 (0.80, 1.77)                | 0.396        |                     |
|                            | BOOST NZ       |                                | .           |                                 | .           |                                  | .            |                     |
|                            | BOOST II UK    | 95 (25.6)                      | 371         | 67 (18.2)                       | 369         | 1.41 (1.07, 1.86)                | 0.016        |                     |
|                            | BOOST II AUS   | 42 (18.9)                      | 222         | 27 (12.2)                       | 221         | 1.55 (1.00, 2.41)                | 0.051        |                     |
|                            | <b>NeOProM</b> | <b>182 (20.8)</b>              | <b>877</b>  | <b>131 (15.1)</b>               | <b>869</b>  | <b>1.38 (1.12, 1.69)</b>         | <b>0.002</b> |                     |
| SGA: Trialist defined - No | SUPPORT        | 107 (17.5)                     | 613         | 93 (15.3)                       | 607         | 1.16 (0.90, 1.51)                | 0.254        | 0.278               |
|                            | COT            | 81 (14.8)                      | 548         | 73 (13.3)                       | 548         | 1.10 (0.83, 1.47)                | 0.501        |                     |
|                            | BOOST II NZ    | 20 (13.1)                      | 153         | 21 (13.4)                       | 157         | 0.98 (0.57, 1.69)                | 0.949        |                     |
|                            | BOOST II UK    | 94 (23.1)                      | 407         | 77 (18.9)                       | 408         | 1.22 (0.93, 1.58)                | 0.149        |                     |
|                            | BOOST II AUS   | 75 (15.4)                      | 487         | 69 (14.1)                       | 489         | 1.09 (0.81, 1.48)                | 0.570        |                     |
|                            | <b>NeOProM</b> | <b>377 (17.1)</b>              | <b>2208</b> | <b>333 (15.1)</b>               | <b>2209</b> | <b>1.14 (0.99, 1.30)</b>         | <b>0.063</b> |                     |
| Yes                        | SUPPORT        | 23 (56.1)                      | 41          | 14 (25.5)                       | 55          | 2.18 (1.29, 3.70)                | 0.004        |                     |
|                            | COT            | 14 (25.9)                      | 54          | 14 (27.5)                       | 51          | 0.95 (0.51, 1.74)                | 0.856        |                     |
|                            | BOOST II NZ    | 1 (5.9)                        | 17          | 3 (23.1)                        | 13          | 0.25 (0.03, 2.11)                | 0.200        |                     |
|                            | BOOST II UK    | 20 (26.7)                      | 75          | 17 (23.6)                       | 72          | 1.13 (0.65, 1.98)                | 0.567        |                     |
|                            | BOOST II AUS   | 24 (30.0)                      | 80          | 14 (17.9)                       | 78          | 1.67 (0.94, 2.99)                | 0.457        |                     |
|                            | <b>NeOProM</b> | <b>82 (30.7)</b>               | <b>267</b>  | <b>62 (23.0)</b>                | <b>269</b>  | <b>1.37 (1.04, 1.81)</b>         | <b>0.034</b> |                     |
| SGA: NeOProM defined - No  | SUPPORT        | 101 (18.0)                     | 560         | 79 (14.5)                       | 546         | 1.27 (0.96, 1.66)                | 0.093        | 0.934               |
|                            | COT            | 81 (14.8)                      | 548         | 73 (13.3)                       | 548         | 1.10 (0.83, 1.47)                | 0.501        |                     |
|                            | BOOST II NZ    | 20 (13.1)                      | 153         | 21 (13.4)                       | 157         | 0.98 (0.57, 1.69)                | 0.949        |                     |
|                            | BOOST II UK    | 98 (23.0)                      | 427         | 79 (18.5)                       | 427         | 1.23 (0.94, 1.61)                | 0.125        |                     |
|                            | BOOST II AUS   | 75 (15.4)                      | 487         | 69 (14.1)                       | 489         | 1.09 (0.81, 1.48)                | 0.570        |                     |
|                            | <b>NeOProM</b> | <b>375 (17.2)</b>              | <b>2175</b> | <b>321 (14.8)</b>               | <b>2167</b> | <b>1.16 (1.02, 1.34)</b>         | <b>0.028</b> |                     |
| Yes                        | SUPPORT        | 29 (30.9)                      | 94          | 28 (24.1)                       | 116         | 1.30 (0.83, 2.03)                | 0.249        |                     |
|                            | COT            | 14 (25.9)                      | 54          | 14 (27.5)                       | 51          | 0.95 (0.51, 1.74)                | 0.856        |                     |
|                            | BOOST II NZ    | 1 (5.9)                        | 17          | 3 (23.1)                        | 13          | 0.25 (0.03, 2.11)                | 0.200        |                     |
|                            | BOOST II UK    | 17 (29.8)                      | 57          | 17 (30.4)                       | 56          | 0.93 (0.51, 1.68)                | 0.799        |                     |
|                            | BOOST II AUS   | 24 (30.0)                      | 80          | 14 (17.9)                       | 78          | 1.67 (0.94, 2.99)                | 0.457        |                     |
|                            | <b>NeOProM</b> | <b>85 (28.1)</b>               | <b>302</b>  | <b>76 (24.2)</b>                | <b>314</b>  | <b>1.14 (0.87, 1.49)</b>         | <b>0.341</b> |                     |

\* Analysis adjusted for trials and multiple births

## Abbreviations/definitions

CI: confidence interval; RR: relative risk; GA: gestational age; SUPPORT: Surfactant Positive Airway Pressure and Pulse Oximetry Trial; COT: Canadian Oxygen Trial; BOOST: Benefits of Oxygen Saturation Targeting; NZ: New Zealand; UK: United Kingdom; AUS: Australia; NeOProM: Neonatal Oxygenation Prospective Meta-analysis; inborn: born inside the treating center; outborn: born outside the treating center (e.g. transferred from another hospital); vaginal: mode of delivery through the vagina; Caesarean: mode of delivery via surgical procedure; ANS: antenatal corticosteroids; singleton: child born as a single birth; multiple: more than one child per birth; start<6 hrs: intervention commenced less than 6 hours after birth; start>=6 hrs: intervention commenced greater than or equal to 6 hours after birth; original software: original oximeter software; revised software: revised oximeter software; SGA: small for gestational age; SGA NeOProM defined: small for gestational age as per definition used by NeOProM collaboration, i.e. less than 10th percentile using charts from Kramer et al.<sup>1</sup>

The subgroup analysis by oximeter software type (original vs revised) excludes n=74 infants in COT who were exposed to both the original and revised software.

Empty cells (.) indicate data not collected or not applicable in this trial.

\*\*\* Low / no event rate(s) makes parameter not estimable.

eTable 18. Bayley-III language and/or cognitive <85, by subgroups

|           |                | Lower Oxygen Saturation Target |             | Higher Oxygen Saturation Target |             | Adjusted* Relative Risk (95% CI) |              |                     |
|-----------|----------------|--------------------------------|-------------|---------------------------------|-------------|----------------------------------|--------------|---------------------|
| Subgroup  | Trial          | n (%)                          | N           | n (%)                           | N           | Adjusted RR                      | p-value      | interaction p-value |
| GA<26 wks | SUPPORT        | 86 (50.9)                      | 169         | 116 (58.9)                      | 197         | 0.86 (0.71, 1.05)                | 0.130        | 0.384               |
|           | COT            | 81 (44.0)                      | 184         | 81 (44.8)                       | 181         | 0.97 (0.78, 1.21)                | 0.790        |                     |
|           | BOOST NZ       | 13 (32.5)                      | 40          | 14 (31.8)                       | 44          | 1.67 (0.81, 3.46)                | 0.167        |                     |
|           | BOOST II UK    | 33 (38.4)                      | 86          | 33 (36.7)                       | 90          | 1.05 (0.71, 1.55)                | 0.794        |                     |
|           | BOOST II AUS   | 54 (35.8)                      | 151         | 56 (32.7)                       | 171         | 1.06 (0.79, 1.41)                | 0.701        |                     |
|           | <b>NeOProM</b> | <b>267 (42.4)</b>              | <b>630</b>  | <b>300 (43.9)</b>               | <b>683</b>  | <b>0.96 (0.85, 1.08)</b>         | <b>0.482</b> |                     |
| GA≥26 wks | SUPPORT        | 135 (44.6)                     | 303         | 136 (44.2)                      | 308         | 1.02 (0.85, 1.23)                | 0.846        |                     |
|           | COT            | 108 (37.2)                     | 290         | 109 (36.7)                      | 297         | 0.99 (0.81, 1.21)                | 0.911        |                     |
|           | BOOST NZ       | 21 (27.6)                      | 76          | 23 (32.9)                       | 70          | 0.73 (0.44, 1.23)                | 0.235        |                     |
|           | BOOST II UK    | 46 (28.9)                      | 159         | 45 (26.6)                       | 169         | 1.13 (0.81, 1.57)                | 0.481        |                     |
|           | BOOST II AUS   | 70 (27.5)                      | 255         | 59 (23.1)                       | 255         | 1.20 (0.90, 1.60)                | 0.217        |                     |
|           | <b>NeOProM</b> | <b>380 (35.1)</b>              | <b>1083</b> | <b>372 (33.8)</b>               | <b>1099</b> | <b>1.03 (0.92, 1.15)</b>         | <b>0.619</b> |                     |
| Inborn    | SUPPORT        | 221 (46.8)                     | 472         | 252 (49.9)                      | 505         | 0.94 (0.82, 1.08)                | 0.380        | 0.525               |
|           | COT            | 176 (40.0)                     | 440         | 175 (40.0)                      | 437         | 0.98 (0.84, 1.14)                | 0.785        |                     |
|           | BOOST NZ       | 33 (30.0)                      | 110         | 36 (33.0)                       | 109         | 0.92 (0.61, 1.36)                | 0.665        |                     |
|           | BOOST II UK    | 71 (32.4)                      | 219         | 71 (30.7)                       | 231         | 1.08 (0.83, 1.41)                | 0.551        |                     |
|           | BOOST II AUS   | 117 (31.0)                     | 377         | 110 (27.2)                      | 405         | 1.12 (0.91, 1.38)                | 0.283        |                     |
|           | <b>NeOProM</b> | <b>618 (38.2)</b>              | <b>1618</b> | <b>644 (38.2)</b>               | <b>1687</b> | <b>0.99 (0.91, 1.08)</b>         | <b>0.816</b> |                     |
| Outborn   | SUPPORT        | .                              | .           | .                               | .           | .                                | .            |                     |
|           | COT            | 13 (38.2)                      | 34          | 15 (36.6)                       | 41          | 1.05 (0.58, 1.88)                | 0.857        |                     |
|           | BOOST NZ       | 1 (16.7)                       | 6           | 1 (20.0)                        | 5           | 0.83 (0.07, 10.2)                | 0.887        |                     |
|           | BOOST II UK    | 8 (30.8)                       | 26          | 7 (25.0)                        | 28          | 1.33 (0.53, 3.34)                | 0.551        |                     |
|           | BOOST II AUS   | 7 (24.1)                       | 29          | 5 (23.8)                        | 21          | 0.86 (0.33, 2.29)                | 0.769        |                     |
|           | <b>NeOProM</b> | <b>29 (30.5)</b>               | <b>95</b>   | <b>28 (29.5)</b>                | <b>95</b>   | <b>1.15 (0.75, 1.75)</b>         | <b>0.521</b> |                     |
| Vaginal   | SUPPORT        | 59 (40.4)                      | 146         | 78 (44.8)                       | 174         | 0.89 (0.68, 1.15)                | 0.369        | 0.331               |
|           | COT            | 80 (45.7)                      | 175         | 70 (36.5)                       | 192         | 1.25 (0.98, 1.60)                | 0.067        |                     |
|           | BOOST NZ       | 12 (25.5)                      | 47          | 17 (33.3)                       | 51          | 1.81 (0.66, 4.97)                | 0.250        |                     |
|           | BOOST II UK    | 46 (31.7)                      | 145         | 44 (29.9)                       | 147         | 1.08 (0.76, 1.52)                | 0.673        |                     |
|           | BOOST II AUS   | 57 (29.8)                      | 191         | 55 (28.8)                       | 191         | 1.01 (0.74, 1.38)                | 0.929        |                     |
|           | <b>NeOProM</b> | <b>254 (36.1)</b>              | <b>704</b>  | <b>264 (35.0)</b>               | <b>755</b>  | <b>1.05 (0.91, 1.20)</b>         | <b>0.498</b> |                     |
| Caesarean | SUPPORT        | 162 (49.7)                     | 326         | 174 (52.6)                      | 331         | 0.95 (0.81, 1.11)                | 0.524        |                     |
|           | COT            | 109 (36.5)                     | 299         | 119 (41.8)                      | 285         | 0.85 (0.71, 1.02)                | 0.078        |                     |
|           | BOOST NZ       | 22 (31.9)                      | 69          | 20 (31.7)                       | 63          | 0.97 (0.58, 1.64)                | 0.924        |                     |
|           | BOOST II UK    | 33 (33.0)                      | 100         | 34 (30.4)                       | 112         | 1.12 (0.77, 1.63)                | 0.538        |                     |
|           | BOOST II AUS   | 66 (30.8)                      | 214         | 59 (25.3)                       | 233         | 1.21 (0.92, 1.60)                | 0.169        |                     |
|           | <b>NeOProM</b> | <b>392 (38.9)</b>              | <b>1008</b> | <b>406 (39.6)</b>               | <b>1024</b> | <b>0.96 (0.87, 1.07)</b>         | <b>0.469</b> |                     |
| ANS - No  | SUPPORT        | 7 (41.2)                       | 17          | 12 (50.0)                       | 24          | 0.79 (0.39, 1.58)                | 0.500        | 0.291               |
|           | COT            | 23 (50.0)                      | 46          | 26 (61.9)                       | 42          | 0.66 (0.30, 1.44)                | 0.295        |                     |
|           | BOOST NZ       | 5 (38.5)                       | 13          | 4 (40.0)                        | 10          | 0.96 (0.35, 2.68)                | 0.959        |                     |
|           | BOOST II UK    | 4 (25.0)                       | 16          | 7 (38.9)                        | 18          | 0.68 (0.26, 1.77)                | 0.429        |                     |

eTable 18. Bayley-III language and/or cognitive <85, by subgroups (continued)

|             |                | Lower Oxygen Saturation Target |             | Higher Oxygen Saturation Target |             | Adjusted* Relative Risk (95% CI) |              |                     |
|-------------|----------------|--------------------------------|-------------|---------------------------------|-------------|----------------------------------|--------------|---------------------|
| Subgroup    | Trial          | n (%)                          | N           | n (%)                           | N           | Adjusted RR                      | p-value      | interaction p-value |
|             | BOOST II AUS   | 12 (29.3)                      | 41          | 8 (29.6)                        | 27          | 0.92 (0.43, 2.00)                | 0.843        |                     |
|             | <b>NeOProM</b> | <b>51 (38.3)</b>               | <b>133</b>  | <b>57 (47.1)</b>                | <b>121</b>  | <b>0.88 (0.66, 1.16)</b>         | <b>0.356</b> |                     |
| ANS - Yes   | SUPPORT        | 214 (47.0)                     | 455         | 240 (49.9)                      | 481         | 0.95 (0.83, 1.09)                | 0.462        |                     |
|             | COT            | 165 (38.6)                     | 427         | 164 (37.6)                      | 436         | 1.01 (0.86, 1.18)                | 0.940        |                     |
|             | BOOST NZ       | 29 (28.2)                      | 103         | 33 (31.7)                       | 104         | 0.90 (0.58, 1.38)                | 0.621        |                     |
|             | BOOST II UK    | 75 (32.9)                      | 228         | 70 (29.3)                       | 239         | 1.15 (0.88, 1.51)                | 0.296        |                     |
|             | BOOST II AUS   | 110 (30.3)                     | 363         | 107 (27.1)                      | 395         | 1.09 (0.88, 1.34)                | 0.434        |                     |
|             | <b>NeOProM</b> | <b>593 (37.6)</b>              | <b>1576</b> | <b>614 (37.1)</b>               | <b>1655</b> | <b>1.00 (0.92, 1.09)</b>         | <b>0.931</b> |                     |
| Male        | SUPPORT        | 127 (53.8)                     | 236         | 158 (56.8)                      | 278         | 0.95 (0.80, 1.11)                | 0.505        | 0.449               |
|             | COT            | 123 (47.5)                     | 259         | 114 (46.3)                      | 246         | 0.99 (0.83, 1.18)                | 0.903        |                     |
|             | BOOST NZ       | 22 (37.9)                      | 58          | 27 (45.8)                       | 59          | 0.84 (0.55, 1.31)                | 0.448        |                     |
|             | BOOST II UK    | 46 (37.4)                      | 123         | 44 (33.6)                       | 131         | 1.20 (0.87, 1.67)                | 0.265        |                     |
|             | BOOST II AUS   | 83 (41.3)                      | 201         | 69 (32.5)                       | 212         | 1.29 (1.01, 1.65)                | 0.043        |                     |
|             | <b>NeOProM</b> | <b>401 (45.7)</b>              | <b>877</b>  | <b>412 (44.5)</b>               | <b>926</b>  | <b>1.03 (0.93, 1.13)</b>         | <b>0.618</b> |                     |
| Female      | SUPPORT        | 94 (39.8)                      | 236         | 94 (41.4)                       | 227         | 0.95 (0.76, 1.19)                | 0.651        |                     |
|             | COT            | 66 (30.7)                      | 215         | 76 (32.8)                       | 232         | 0.93 (0.72, 1.22)                | 0.614        |                     |
|             | BOOST NZ       | 12 (20.7)                      | 58          | 10 (18.2)                       | 55          | 1.14 (0.54, 2.42)                | 0.612        |                     |
|             | BOOST II UK    | 33 (27.0)                      | 122         | 34 (26.6)                       | 128         | 0.98 (0.67, 1.42)                | 0.899        |                     |
|             | BOOST II AUS   | 41 (20.0)                      | 205         | 46 (21.5)                       | 214         | 0.92 (0.64, 1.32)                | 0.652        |                     |
|             | <b>NeOProM</b> | <b>246 (29.4)</b>              | <b>836</b>  | <b>260 (30.4)</b>               | <b>856</b>  | <b>0.94 (0.82, 1.09)</b>         | <b>0.416</b> |                     |
| Singleton   | SUPPORT        | 166 (47.3)                     | 351         | 184 (48.5)                      | 379         | 0.97 (0.84, 1.13)                | 0.735        | 0.180               |
|             | COT            | 134 (41.7)                     | 321         | 126 (38.2)                      | 330         | 1.09 (0.91, 1.32)                | 0.354        |                     |
|             | BOOST NZ       | 24 (28.2)                      | 85          | 25 (28.7)                       | 87          | 0.98 (0.61, 1.58)                | 0.942        |                     |
|             | BOOST II UK    | 47 (28.7)                      | 164         | 54 (29.5)                       | 183         | 0.97 (0.70, 1.35)                | 0.862        |                     |
|             | BOOST II AUS   | 93 (30.5)                      | 305         | 86 (26.4)                       | 326         | 1.16 (0.90, 1.48)                | 0.253        |                     |
|             | <b>NeOProM</b> | <b>464 (37.8)</b>              | <b>1226</b> | <b>475 (36.4)</b>               | <b>1305</b> | <b>1.03 (0.94, 1.14)</b>         | <b>0.512</b> |                     |
| Multiple    | SUPPORT        | 55 (45.5)                      | 121         | 68 (54.0)                       | 126         | 0.82 (0.61, 1.10)                | 0.192        |                     |
|             | COT            | 55 (35.9)                      | 153         | 64 (43.2)                       | 148         | 0.82 (0.65, 1.04)                | 0.105        |                     |
|             | BOOST NZ       | 10 (32.3)                      | 31          | 12 (44.4)                       | 27          | 0.81 (0.44, 1.48)                | 0.492        |                     |
|             | BOOST II UK    | 32 (39.5)                      | 81          | 24 (31.6)                       | 76          | 1.29 (0.88, 1.90)                | 0.189        |                     |
|             | BOOST II AUS   | 31 (30.7)                      | 101         | 29 (29.0)                       | 100         | 1.04 (0.73, 1.49)                | 0.808        |                     |
|             | <b>NeOProM</b> | <b>183 (37.6)</b>              | <b>487</b>  | <b>197 (41.3)</b>               | <b>477</b>  | <b>0.92 (0.79, 1.06)</b>         | <b>0.251</b> |                     |
| start<6 hrs | SUPPORT        | 216 (46.9)                     | 461         | 248 (50.1)                      | 495         | 0.94 (0.82, 1.08)                | 0.372        | 0.443               |
|             | COT            | 6 (27.3)                       | 22          | 10 (47.6)                       | 21          | 0.57 (0.25, 1.32)                | 0.191        |                     |
|             | BOOST NZ       | 13 (59.1)                      | 22          | 6 (28.6)                        | 21          | 2.24 (0.51, 9.88)                | 0.287        |                     |
|             | BOOST II UK    |                                | .           |                                 | .           |                                  | .            |                     |
|             | BOOST II AUS   | 13 (33.3)                      | 39          | 14 (28.6)                       | 49          | 1.14 (0.60, 2.18)                | 0.687        |                     |
|             | <b>NeOProM</b> | <b>248 (45.6)</b>              | <b>544</b>  | <b>278 (47.4)</b>               | <b>586</b>  | <b>0.95 (0.84, 1.08)</b>         | <b>0.465</b> |                     |
| >=6 hrs     | SUPPORT        | 2 (40.0)                       | 5           | 0                               | 4           |                                  | ***          |                     |
|             | COT            | 183 (40.5)                     | 452         | 180 (39.4)                      | 457         | 1.01 (0.87, 1.17)                | 0.934        |                     |
|             | BOOST NZ       | 21 (22.3)                      | 94          | 31 (33.3)                       | 93          | 0.68 (0.42, 1.10)                | 0.118        |                     |

eTable 18. Bayley-III language and/or cognitive <85, by subgroups (continued)

|           |                | Lower Oxygen Saturation Target |             | Higher Oxygen Saturation Target |             | Adjusted* Relative Risk (95% CI) |              |                     |
|-----------|----------------|--------------------------------|-------------|---------------------------------|-------------|----------------------------------|--------------|---------------------|
| Subgroup  | Trial          | n (%)                          | N           | n (%)                           | N           | Adjusted RR                      | p-value      | interaction p-value |
|           | BOOST II UK    |                                | .           |                                 | .           |                                  | .            |                     |
|           | BOOST II AUS   | 111 (30.3)                     | 366         | 101 (26.8)                      | 377         | 1.14 (0.92, 1.41)                | 0.243        |                     |
|           | <b>NeOProM</b> | <b>317 (34.6)</b>              | <b>917</b>  | <b>312 (33.5)</b>               | <b>931</b>  | <b>1.02 (0.91, 1.15)</b>         | <b>0.750</b> |                     |
| Original  | SUPPORT        | 221 (46.8)                     | 472         | 252 (49.9)                      | 505         | 0.94 (0.82, 1.08)                | 0.380        | 0.277               |
| software  | COT            | 83 (37.6)                      | 221         | 88 (41.1)                       | 214         | 0.90 (0.72, 1.12)                | 0.330        |                     |
|           | BOOST NZ       | 34 (29.3)                      | 116         | 37 (32.5)                       | 114         | 0.91 (0.61, 1.35)                | 0.641        |                     |
|           | BOOST II UK    | 24 (44.4)                      | 54          | 18 (31.0)                       | 58          | 1.52 (0.90, 2.58)                | 0.120        |                     |
|           | BOOST II AUS   | 73 (29.0)                      | 252         | 69 (26.2)                       | 263         | 1.08 (0.83, 1.41)                | 0.574        |                     |
|           | <b>NeOProM</b> | <b>435 (39.0)</b>              | <b>1115</b> | <b>464 (40.2)</b>               | <b>1154</b> | <b>0.97 (0.88, 1.07)</b>         | <b>0.521</b> |                     |
| Revised   | SUPPORT        |                                | .           |                                 | .           |                                  | .            |                     |
| software  | COT            | 93 (41.5)                      | 224         | 85 (37.4)                       | 227         | 1.06 (0.85, 1.32)                | 0.590        |                     |
|           | BOOST NZ       |                                | .           |                                 | .           |                                  | .            |                     |
|           | BOOST II UK    | 55 (28.8)                      | 191         | 60 (29.9)                       | 201         | 0.98 (0.73, 1.31)                | 0.888        |                     |
|           | BOOST II AUS   | 51 (33.1)                      | 154         | 46 (28.2)                       | 163         | 1.20 (0.87, 1.67)                | 0.264        |                     |
|           | <b>NeOProM</b> | <b>199 (35.0)</b>              | <b>569</b>  | <b>191 (32.3)</b>               | <b>591</b>  | <b>1.06 (0.91, 1.24)</b>         | <b>0.422</b> |                     |
| SGA:      | SUPPORT        | 212 (46.5)                     | 456         | 227 (48.6)                      | 467         | 0.95 (0.83, 1.10)                | 0.502        | 0.768               |
| Trialist  | COT            | 170 (39.1)                     | 435         | 173 (39.1)                      | 443         | 0.98 (0.84, 1.14)                | 0.770        |                     |
| defined - | BOOST II NZ    | 26 (25.7)                      | 101         | 34 (32.1)                       | 106         | 0.79 (0.53, 1.18)                | 0.253        |                     |
| No        | BOOST II UK    | 69 (32.7)                      | 211         | 64 (28.8)                       | 222         | 1.18 (0.89, 1.56)                | 0.252        |                     |
|           | BOOST II AUS   | 103 (28.9)                     | 356         | 98 (26.6)                       | 368         | 1.09 (0.87, 1.36)                | 0.451        |                     |
|           | <b>NeOProM</b> | <b>580 (37.2)</b>              | <b>1559</b> | <b>596 (37.1)</b>               | <b>1606</b> | <b>0.99 (0.91, 1.08)</b>         | <b>0.867</b> |                     |
| Yes       | SUPPORT        | 9 (56.3)                       | 16          | 25 (65.8)                       | 38          | 0.86 (0.53, 1.41)                | 0.558        |                     |
|           | COT            | 19 (48.7)                      | 39          | 17 (48.6)                       | 35          | 1.00 (0.63, 1.60)                | 0.995        |                     |
|           | BOOST II NZ    | 8 (53.3)                       | 15          | 3 (37.5)                        | 8           | 1.28 (0.47, 3.47)                | 0.626        |                     |
|           | BOOST II UK    | 10 (30.3)                      | 33          | 14 (37.8)                       | 37          | 1.33 (0.88, 2.02)                | 0.172        |                     |
|           | BOOST II AUS   | 21 (42.0)                      | 50          | 17 (29.3)                       | 58          | 1.43 (0.86, 2.40)                | 0.171        |                     |
|           | <b>NeOProM</b> | <b>67 (43.8)</b>               | <b>153</b>  | <b>76 (43.2)</b>                | <b>176</b>  | <b>1.03 (0.80, 1.31)</b>         | <b>0.828</b> |                     |
| SGA:      | SUPPORT        | 187 (45.4)                     | 412         | 203 (47.7)                      | 426         | 0.95 (0.82, 1.10)                | 0.509        | 0.837               |
| NeOProM   | COT            | 170 (39.1)                     | 435         | 173 (39.1)                      | 443         | 0.98 (0.84, 1.14)                | 0.770        |                     |
| defined - | BOOST II NZ    | 26 (25.7)                      | 101         | 34 (32.1)                       | 106         | 0.79 (0.53, 1.18)                | 0.253        |                     |
| No        | BOOST II UK    | 72 (32.6)                      | 221         | 69 (29.5)                       | 234         | 1.15 (0.88, 1.51)                | 0.306        |                     |
|           | BOOST II AUS   | 103 (28.9)                     | 356         | 98 (26.6)                       | 368         | 1.09 (0.87, 1.36)                | 0.451        |                     |
|           | <b>NeOProM</b> | <b>558 (36.6)</b>              | <b>1525</b> | <b>577 (36.6)</b>               | <b>1577</b> | <b>0.99 (0.91, 1.08)</b>         | <b>0.838</b> |                     |
| Yes       | SUPPORT        | 34 (56.7)                      | 60          | 49 (62.0)                       | 79          | 0.91 (0.68, 1.22)                | 0.538        |                     |
|           | COT            | 19 (48.7)                      | 39          | 17 (48.6)                       | 35          | 1.00 (0.63, 1.60)                | 0.995        |                     |
|           | BOOST II NZ    | 8 (53.3)                       | 15          | 3 (37.5)                        | 8           | 1.28 (0.47, 3.47)                | 0.626        |                     |
|           | BOOST II UK    | 7 (29.2)                       | 24          | 9 (36.0)                        | 25          | 1.29 (0.75, 2.22)                | 0.364        |                     |
|           | BOOST II AUS   | 21 (42.0)                      | 50          | 17 (29.3)                       | 58          | 1.43 (0.86, 2.40)                | 0.171        |                     |
|           | <b>NeOProM</b> | <b>89 (47.3)</b>               | <b>188</b>  | <b>95 (46.3)</b>                | <b>205</b>  | <b>1.04 (0.84, 1.28)</b>         | <b>0.740</b> |                     |

\* Analysis adjusted for trials and multiple births

## Abbreviations/definitions

CI: confidence interval; RR: relative risk; GA: gestational age; SUPPORT: Surfactant Positive Airway Pressure and Pulse Oximetry Trial; COT: Canadian Oxygen Trial; BOOST: Benefits of Oxygen Saturation Targeting; NZ: New Zealand; UK: United Kingdom; AUS: Australia; NeOProM: Neonatal Oxygenation Prospective Meta-analysis; inborn: born inside the treating center; outborn: born outside the treating center (e.g. transferred from another hospital); vaginal: mode of delivery through the vagina; Caesarean: mode of delivery via surgical procedure; ANS: antenatal corticosteroids; singleton: child born as a single birth; multiple: more than one child per birth; start<6 hrs: intervention commenced less than 6 hours after birth; start>=6 hrs: intervention commenced greater than or equal to 6 hours after birth; original software: original oximeter software; revised software: revised oximeter software; SGA: small for gestational age; SGA NeOProM defined: small for gestational age as per definition used by NeOProM collaboration, i.e. less than 10th percentile using charts from Kramer et al.<sup>1</sup>

The subgroup analysis by oximeter software type (original vs revised) excludes n=74 infants in COT who were exposed to both the original and revised software.

These analyses exclude infants in SUPPORT and COT where values of Bayley-III were imputed for infants who had unsuccessful Bayley-III assessments due to severe developmental delay or autism.

Empty cells (.) indicate data not collected or not applicable in this trial.

\*\*\* Low / no event rate(s) makes parameter not estimable.

eTable 19. Bayley-III cognitive <85, by subgroups

|           |                | Lower Oxygen Saturation Target |             | Higher Oxygen Saturation Target |             | Adjusted* Relative Risk (95% CI) |              |                     |
|-----------|----------------|--------------------------------|-------------|---------------------------------|-------------|----------------------------------|--------------|---------------------|
| Subgroup  | Trial          | n (%)                          | N           | n (%)                           | N           | Adjusted RR                      | p-value      | interaction p-value |
| GA<26 wks | SUPPORT        | 45 (26.6)                      | 169         | 67 (34.2)                       | 196         | 0.77 (0.55, 1.06)                | 0.111        | 0.168               |
|           | COT            | 43 (23.4)                      | 184         | 46 (25.4)                       | 181         | 0.91 (0.65, 1.27)                | 0.576        |                     |
|           | BOOST NZ       | 9 (22.5)                       | 40          | 3 (6.8)                         | 44          | 3.30 (0.96, 11.34)               | 0.150        |                     |
|           | BOOST II UK    | 23 (26.7)                      | 86          | 23 (25.6)                       | 90          | 1.08 (0.65, 1.80)                | 0.769        |                     |
|           | BOOST II AUS   | 31 (20.5)                      | 151         | 31 (18.1)                       | 171         | 1.08 (0.69, 1.67)                | 0.741        |                     |
|           | <b>NeOProM</b> | <b>151 (24.0)</b>              | <b>630</b>  | <b>170 (24.9)</b>               | <b>682</b>  | <b>0.95 (0.78, 1.14)</b>         | <b>0.554</b> |                     |
| GA≥26 wks | SUPPORT        | 60 (19.9)                      | 302         | 65 (21.2)                       | 307         | 0.99 (0.71, 1.38)                | 0.937        |                     |
|           | COT            | 48 (16.6)                      | 289         | 40 (13.5)                       | 297         | 1.19 (0.80, 1.78)                | 0.392        |                     |
|           | BOOST NZ       | 11 (14.5)                      | 76          | 9 (12.9)                        | 70          | 0.46 (0.10, 2.18)                | 0.330        |                     |
|           | BOOST II UK    | 30 (18.9)                      | 159         | 26 (15.4)                       | 169         | 1.25 (0.76, 2.05)                | 0.377        |                     |
|           | BOOST II AUS   | 33 (12.9)                      | 255         | 21 (8.2)                        | 255         | 1.55 (0.95, 2.54)                | 0.079        |                     |
|           | <b>NeOProM</b> | <b>182 (16.8)</b>              | <b>1081</b> | <b>161 (14.7)</b>               | <b>1098</b> | <b>1.15 (0.94, 1.40)</b>         | <b>0.182</b> |                     |
| Inborn    | SUPPORT        | 105 (22.3)                     | 471         | 132 (26.2)                      | 503         | 0.87 (0.69, 1.10)                | 0.231        | 0.709               |
|           | COT            | 83 (18.9)                      | 439         | 77 (17.6)                       | 437         | 1.05 (0.80, 1.39)                | 0.724        |                     |
|           | BOOST NZ       | 19 (17.3)                      | 110         | 11 (10.1)                       | 109         | 0.65 (0.27, 1.54)                | 0.325        |                     |
|           | BOOST II UK    | 47 (21.5)                      | 219         | 45 (19.5)                       | 231         | 1.15 (0.79, 1.67)                | 0.469        |                     |
|           | BOOST II AUS   | 62 (16.4)                      | 377         | 51 (12.6)                       | 405         | 1.27 (0.91, 1.77)                | 0.161        |                     |
|           | <b>NeOProM</b> | <b>316 (19.6)</b>              | <b>1616</b> | <b>316 (18.8)</b>               | <b>1685</b> | <b>1.04 (0.90, 1.19)</b>         | <b>0.623</b> |                     |
| Outborn   | SUPPORT        | .                              | .           | .                               | .           | .                                | .            |                     |
|           | COT            | 8 (23.5)                       | 34          | 9 (22.0)                        | 41          | 1.07 (0.55, 2.09)                | 0.844        |                     |
|           | BOOST NZ       | 1 (16.7)                       | 6           | 1 (20.0)                        | 5           | 0.83 (0.07, 10.2)                | 0.887        |                     |
|           | BOOST II UK    | 6 (23.1)                       | 26          | 4 (14.3)                        | 28          | 1.97 (0.56, 6.99)                | 0.292        |                     |
|           | BOOST II AUS   | 2 (6.9)                        | 29          | 1 (4.8)                         | 21          | 1.43 (0.15, 13.2)                | 0.754        |                     |
|           | <b>NeOProM</b> | <b>17 (17.9)</b>               | <b>95</b>   | <b>15 (15.8)</b>                | <b>95</b>   | <b>1.25 (0.71, 2.18)</b>         | <b>0.440</b> |                     |
| Vaginal   | SUPPORT        | 25 (17.2)                      | 145         | 46 (26.6)                       | 173         | 0.58 (0.37, 0.91)                | 0.018        | 0.735               |
|           | COT            | 47 (27.0)                      | 174         | 42 (21.9)                       | 192         | 1.23 (0.87, 1.75)                | 0.239        |                     |
|           | BOOST NZ       | 9 (19.1)                       | 47          | 4 (7.8)                         | 51          | 2.44 (0.81, 7.40)                | 0.277        |                     |
|           | BOOST II UK    | 27 (18.6)                      | 145         | 30 (20.4)                       | 147         | 0.93 (0.59, 1.48)                | 0.771        |                     |
|           | BOOST II AUS   | 29 (15.2)                      | 191         | 22 (11.5)                       | 191         | 1.29 (0.77, 2.16)                | 0.342        |                     |
|           | <b>NeOProM</b> | <b>137 (19.5)</b>              | <b>702</b>  | <b>144 (19.1)</b>               | <b>754</b>  | <b>1.02 (0.83, 1.25)</b>         | <b>0.877</b> |                     |
| Caesarean | SUPPORT        | 80 (24.5)                      | 326         | 86 (26.1)                       | 330         | 0.97 (0.74, 1.28)                | 0.841        |                     |
|           | COT            | 44 (14.7)                      | 299         | 44 (15.4)                       | 285         | 0.93 (0.63, 1.36)                | 0.692        |                     |
|           | BOOST NZ       | 11 (15.9)                      | 69          | 8 (12.7)                        | 63          | 0.48 (0.11, 2.03)                | 0.315        |                     |
|           | BOOST II UK    | 26 (26.0)                      | 100         | 19 (17.0)                       | 112         | 1.56 (0.89, 2.71)                | 0.117        |                     |
|           | BOOST II AUS   | 34 (15.9)                      | 214         | 29 (12.4)                       | 233         | 1.26 (0.82, 1.93)                | 0.294        |                     |
|           | <b>NeOProM</b> | <b>195 (19.3)</b>              | <b>1008</b> | <b>186 (18.2)</b>               | <b>1023</b> | <b>1.07 (0.89, 1.28)</b>         | <b>0.495</b> |                     |
| ANS - No  | SUPPORT        | 6 (35.3)                       | 17          | 8 (33.3)                        | 24          | 1.06 (0.45, 2.49)                | 0.896        | 0.132               |
|           | COT            | 12 (26.1)                      | 46          | 16 (38.1)                       | 42          | 0.67 (0.36, 1.28)                | 0.230        |                     |
|           | BOOST NZ       | 1 (7.7)                        | 13          | 2 (20.0)                        | 10          | 0.72 (0.13, 4.08)                | 0.713        |                     |
|           | BOOST II UK    | 1 (6.3)                        | 16          | 3 (16.7)                        | 18          | 0.38 (0.05, 3.22)                | 0.376        |                     |

eTable 19. Bayley-III cognitive <85, by subgroups (continued)

|             |                | Lower Oxygen Saturation Target |             | Higher Oxygen Saturation Target |             | Adjusted* Relative Risk (95% CI) |              |                     |
|-------------|----------------|--------------------------------|-------------|---------------------------------|-------------|----------------------------------|--------------|---------------------|
| Subgroup    | Trial          | n (%)                          | N           | n (%)                           | N           | Adjusted RR                      | p-value      | interaction p-value |
|             | BOOST II AUS   | 6 (14.6)                       | 41          | 5 (18.5)                        | 27          | 0.77 (0.26, 2.29)                | 0.633        |                     |
|             | <b>NeOProM</b> | <b>26 (19.5)</b>               | <b>133</b>  | <b>34 (28.1)</b>                | <b>121</b>  | <b>0.87 (0.50, 1.50)</b>         | <b>0.605</b> |                     |
| ANS - Yes   | SUPPORT        | 99 (21.8)                      | 454         | 124 (25.9)                      | 479         | 0.87 (0.68, 1.10)                | 0.246        |                     |
|             | COT            | 79 (18.5)                      | 426         | 70 (16.1)                       | 436         | 1.12 (0.84, 1.50)                | 0.429        |                     |
|             | BOOST NZ       | 19 (18.4)                      | 103         | 10 (9.6)                        | 104         | 0.94 (0.46, 1.91)                | 0.860        |                     |
|             | BOOST II UK    | 52 (22.8)                      | 228         | 45 (18.8)                       | 239         | 1.25 (0.87, 1.82)                | 0.230        |                     |
|             | BOOST II AUS   | 58 (16.0)                      | 363         | 47 (11.9)                       | 395         | 1.28 (0.91, 1.81)                | 0.154        |                     |
|             | <b>NeOProM</b> | <b>307 (19.5)</b>              | <b>1574</b> | <b>296 (17.9)</b>               | <b>1653</b> | <b>1.08 (0.93, 1.24)</b>         | <b>0.314</b> |                     |
| Male        | SUPPORT        | 65 (27.5)                      | 236         | 84 (30.2)                       | 278         | 0.91 (0.69, 1.21)                | 0.514        | 0.844               |
|             | COT            | 57 (22.0)                      | 259         | 56 (22.8)                       | 246         | 0.95 (0.68, 1.30)                | 0.731        |                     |
|             | BOOST NZ       | 12 (20.7)                      | 58          | 9 (15.3)                        | 59          | 0.90 (0.40, 2.04)                | 0.798        |                     |
|             | BOOST II UK    | 30 (24.4)                      | 123         | 28 (21.4)                       | 131         | 1.19 (0.74, 1.90)                | 0.471        |                     |
|             | BOOST II AUS   | 46 (22.9)                      | 201         | 34 (16.0)                       | 212         | 1.36 (0.93, 2.00)                | 0.112        |                     |
|             | <b>NeOProM</b> | <b>210 (23.9)</b>              | <b>877</b>  | <b>211 (22.8)</b>               | <b>926</b>  | <b>1.04 (0.88, 1.23)</b>         | <b>0.668</b> |                     |
| Female      | SUPPORT        | 40 (17.0)                      | 235         | 48 (21.3)                       | 225         | 0.78 (0.53, 1.16)                | 0.218        |                     |
|             | COT            | 34 (15.9)                      | 214         | 30 (12.9)                       | 232         | 1.28 (0.80, 2.03)                | 0.307        |                     |
|             | BOOST NZ       | 8 (13.8)                       | 58          | 3 (5.5)                         | 55          | 2.53 (0.71, 9.05)                | 0.009        |                     |
|             | BOOST II UK    | 23 (18.9)                      | 122         | 21 (16.4)                       | 128         | 1.18 (0.70, 2.01)                | 0.537        |                     |
|             | BOOST II AUS   | 18 (8.8)                       | 205         | 18 (8.4)                        | 214         | 1.00 (0.55, 1.80)                | 0.996        |                     |
|             | <b>NeOProM</b> | <b>123 (14.7)</b>              | <b>834</b>  | <b>120 (14.1)</b>               | <b>854</b>  | <b>1.08 (0.84, 1.38)</b>         | <b>0.540</b> |                     |
| Singleton   | SUPPORT        | 78 (22.3)                      | 350         | 98 (26.0)                       | 377         | 0.86 (0.66, 1.11)                | 0.245        | 0.687               |
|             | COT            | 63 (19.7)                      | 320         | 59 (17.9)                       | 330         | 1.10 (0.80, 1.52)                | 0.555        |                     |
|             | BOOST NZ       | 15 (17.6)                      | 85          | 7 (8.0)                         | 87          | 2.19 (0.94, 5.11)                | 0.069        |                     |
|             | BOOST II UK    | 29 (17.7)                      | 164         | 31 (16.9)                       | 183         | 1.04 (0.66, 1.65)                | 0.855        |                     |
|             | BOOST II AUS   | 49 (16.1)                      | 305         | 38 (11.7)                       | 326         | 1.38 (0.93, 2.04)                | 0.110        |                     |
|             | <b>NeOProM</b> | <b>234 (19.1)</b>              | <b>1224</b> | <b>233 (17.9)</b>               | <b>1303</b> | <b>1.06 (0.90, 1.25)</b>         | <b>0.490</b> |                     |
| Multiple    | SUPPORT        | 27 (22.3)                      | 121         | 34 (27.0)                       | 126         | 0.90 (0.52, 1.56)                | 0.712        |                     |
|             | COT            | 28 (18.3)                      | 153         | 27 (18.2)                       | 148         | 0.96 (0.61, 1.50)                | 0.842        |                     |
|             | BOOST NZ       | 5 (16.1)                       | 31          | 5 (18.5)                        | 27          | 0.72 (0.36, 1.41)                | 0.336        |                     |
|             | BOOST II UK    | 24 (29.6)                      | 81          | 18 (23.7)                       | 76          | 1.30 (0.79, 2.16)                | 0.304        |                     |
|             | BOOST II AUS   | 15 (14.9)                      | 101         | 14 (14.0)                       | 100         | 0.99 (0.55, 1.75)                | 0.960        |                     |
|             | <b>NeOProM</b> | <b>99 (20.3)</b>               | <b>487</b>  | <b>98 (20.5)</b>                | <b>477</b>  | <b>1.00 (0.78, 1.28)</b>         | <b>0.993</b> |                     |
| start<6 hrs | SUPPORT        | 103 (22.4)                     | 460         | 130 (26.4)                      | 493         | 0.86 (0.68, 1.10)                | 0.230        | 0.250               |
|             | COT            | 3 (13.6)                       | 22          | 4 (19.0)                        | 21          | 0.73 (0.19, 2.80)                | 0.644        |                     |
|             | BOOST NZ       | 10 (45.5)                      | 22          | 2 (9.5)                         | 21          | 4.77 (1.18, 19.27)               | 0.232        |                     |
|             | BOOST II UK    |                                | .           |                                 | .           |                                  | .            |                     |
|             | BOOST II AUS   | 8 (20.5)                       | 39          | 6 (12.2)                        | 49          | 1.68 (0.63, 4.43)                | 0.123        |                     |
|             | <b>NeOProM</b> | <b>124 (22.8)</b>              | <b>543</b>  | <b>142 (24.3)</b>               | <b>584</b>  | <b>0.93 (0.75, 1.16)</b>         | <b>0.525</b> |                     |
| >=6 hrs     | SUPPORT        | 1 (20.0)                       | 5           | 0                               | 4           |                                  | ***          |                     |
|             | COT            | 88 (19.5)                      | 451         | 82 (17.9)                       | 457         | 1.07 (0.82, 1.39)                | 0.638        |                     |
|             | BOOST NZ       | 10 (10.6)                      | 94          | 10 (10.8)                       | 93          | 0.75 (0.31, 1.82)                | 0.528        |                     |



eTable 19. Bayley-III cognitive <85, by subgroups (continued)

|                            |                | Lower Oxygen Saturation Target |             | Higher Oxygen Saturation Target |             | Adjusted* Relative Risk (95% CI) |              |                     |
|----------------------------|----------------|--------------------------------|-------------|---------------------------------|-------------|----------------------------------|--------------|---------------------|
| Subgroup                   | Trial          | n (%)                          | N           | n (%)                           | N           | Adjusted RR                      | p-value      | interaction p-value |
|                            | BOOST II UK    |                                | .           |                                 | .           |                                  | .            |                     |
|                            | BOOST II AUS   | 56 (15.3)                      | 366         | 46 (12.2)                       | 377         | 1.24 (0.88, 1.75)                | 0.213        |                     |
|                            | <b>NeOProM</b> | <b>155 (16.9)</b>              | <b>916</b>  | <b>138 (14.8)</b>               | <b>931</b>  | <b>1.12 (0.91, 1.37)</b>         | <b>0.282</b> |                     |
| Original software          | SUPPORT        | 105 (22.3)                     | 471         | 132 (26.2)                      | 503         | 0.87 (0.69, 1.10)                | 0.231        | 0.561               |
|                            | COT            | 43 (19.5)                      | 221         | 41 (19.2)                       | 214         | 1.02 (0.70, 1.48)                | 0.925        |                     |
|                            | BOOST NZ       | 20 (17.2)                      | 116         | 12 (10.5)                       | 114         | 0.65 (0.28, 1.52)                | 0.320        |                     |
|                            | BOOST II UK    | 15 (27.8)                      | 54          | 11 (19.0)                       | 58          | 1.70 (0.78, 3.70)                | 0.180        |                     |
|                            | BOOST II AUS   | 36 (14.3)                      | 252         | 31 (11.8)                       | 263         | 1.18 (0.77, 1.82)                | 0.450        |                     |
|                            | <b>NeOProM</b> | <b>219 (19.7)</b>              | <b>1114</b> | <b>227 (19.7)</b>               | <b>1152</b> | <b>1.02 (0.86, 1.21)</b>         | <b>0.798</b> |                     |
| Revised software           | SUPPORT        |                                | .           |                                 | .           |                                  | .            |                     |
|                            | COT            | 44 (19.6)                      | 224         | 38 (16.7)                       | 227         | 1.10 (0.75, 1.63)                | 0.617        |                     |
|                            | BOOST NZ       |                                | .           |                                 | .           |                                  | .            |                     |
|                            | BOOST II UK    | 38 (19.9)                      | 191         | 38 (18.9)                       | 201         | 1.05 (0.70, 1.58)                | 0.809        |                     |
|                            | BOOST II AUS   | 28 (18.2)                      | 154         | 21 (12.9)                       | 163         | 1.38 (0.83, 2.28)                | 0.211        |                     |
|                            | <b>NeOProM</b> | <b>110 (19.3)</b>              | <b>569</b>  | <b>97 (16.4)</b>                | <b>591</b>  | <b>1.13 (0.88, 1.44)</b>         | <b>0.338</b> |                     |
| SGA: Trialist defined - No | SUPPORT        | 99 (21.8)                      | 455         | 113 (24.3)                      | 465         | 0.91 (0.71, 1.17)                | 0.478        | 0.734               |
|                            | COT            | 84 (19.4)                      | 434         | 80 (18.1)                       | 443         | 1.04 (0.79, 1.36)                | 0.798        |                     |
|                            | BOOST II NZ    | 15 (14.9)                      | 101         | 10 (9.4)                        | 106         | 1.20 (0.94, 1.53)                | 0.134        |                     |
|                            | BOOST II UK    | 43 (20.4)                      | 211         | 41 (18.5)                       | 222         | 1.21 (0.82, 1.77)                | 0.342        |                     |
|                            | BOOST II AUS   | 54 (15.2)                      | 356         | 43 (11.7)                       | 368         | 1.28 (0.89, 1.83)                | 0.185        |                     |
|                            | <b>NeOProM</b> | <b>295 (18.9)</b>              | <b>1557</b> | <b>287 (17.9)</b>               | <b>1604</b> | <b>1.05 (0.91, 1.22)</b>         | <b>0.488</b> |                     |
| Yes                        | SUPPORT        | 6 (37.5)                       | 16          | 19 (50.0)                       | 38          | 0.73 (0.36, 1.48)                | 0.383        |                     |
|                            | COT            | 7 (17.9)                       | 39          | 6 (17.1)                        | 35          | 1.05 (0.40, 2.73)                | 0.928        |                     |
|                            | BOOST II NZ    | 5 (33.3)                       | 15          | 2 (25.0)                        | 8           | 1.25 (0.31, 5.09)                | 0.756        |                     |
|                            | BOOST II UK    | 10 (30.3)                      | 33          | 8 (21.6)                        | 37          | 2.33 (1.26, 4.31)                | 0.007        |                     |
|                            | BOOST II AUS   | 10 (20.0)                      | 50          | 9 (15.5)                        | 58          | 1.29 (0.57, 2.92)                | 0.543        |                     |
|                            | <b>NeOProM</b> | <b>38 (24.8)</b>               | <b>153</b>  | <b>44 (25.0)</b>                | <b>176</b>  | <b>1.05 (0.73, 1.52)</b>         | <b>0.782</b> |                     |
| SGA: NeOProM defined - No  | SUPPORT        | 87 (21.2)                      | 411         | 98 (23.1)                       | 424         | 0.94 (0.72, 1.24)                | 0.680        | 0.392               |
|                            | COT            | 84 (19.4)                      | 434         | 80 (18.1)                       | 443         | 1.04 (0.79, 1.36)                | 0.798        |                     |
|                            | BOOST II NZ    | 15 (14.9)                      | 101         | 10 (9.4)                        | 106         | 1.20 (0.94, 1.53)                | 0.134        |                     |
|                            | BOOST II UK    | 46 (20.8)                      | 221         | 45 (19.2)                       | 234         | 1.15 (0.79, 1.69)                | 0.459        |                     |
|                            | BOOST II AUS   | 54 (15.2)                      | 356         | 43 (11.7)                       | 368         | 1.28 (0.89, 1.83)                | 0.185        |                     |
|                            | <b>NeOProM</b> | <b>286 (18.8)</b>              | <b>1523</b> | <b>276 (17.5)</b>               | <b>1575</b> | <b>1.06 (0.92, 1.23)</b>         | <b>0.417</b> |                     |
| Yes                        | SUPPORT        | 18 (30.0)                      | 60          | 34 (43.0)                       | 79          | 0.70 (0.44, 1.11)                | 0.125        |                     |
|                            | COT            | 7 (17.9)                       | 39          | 6 (17.1)                        | 35          | 1.05 (0.40, 2.73)                | 0.928        |                     |
|                            | BOOST II NZ    | 5 (33.3)                       | 15          | 2 (25.0)                        | 8           | 1.25 (0.31, 5.09)                | 0.756        |                     |
|                            | BOOST II UK    | 7 (29.2)                       | 24          | 4 (16.0)                        | 25          | 2.89 (1.16, 7.19)                | 0.022        |                     |
|                            | BOOST II AUS   | 10 (20.0)                      | 50          | 9 (15.5)                        | 58          | 1.29 (0.57, 2.92)                | 0.543        |                     |
|                            | <b>NeOProM</b> | <b>47 (25.0)</b>               | <b>188</b>  | <b>55 (26.8)</b>                | <b>205</b>  | <b>0.92 (0.67, 1.27)</b>         | <b>0.600</b> |                     |

\* Analysis adjusted for trials and multiple births

## Abbreviations/definitions

CI: confidence interval; RR: relative risk; GA: gestational age; SUPPORT: Surfactant Positive Airway Pressure and Pulse Oximetry Trial; COT: Canadian Oxygen Trial; BOOST: Benefits of Oxygen Saturation Targeting; NZ: New Zealand; UK: United Kingdom; AUS: Australia; NeOProM: Neonatal Oxygenation Prospective Meta-analysis; inborn: born inside the treating center; outborn: born outside the treating center (e.g. transferred from another hospital); vaginal: mode of delivery through the vagina; Caesarean: mode of delivery via surgical procedure; ANS: antenatal corticosteroids; singleton: child born as a single birth; multiple: more than one child per birth; start<6 hrs: intervention commenced less than 6 hours after birth; start>=6 hrs: intervention commenced greater than or equal to 6 hours after birth; original software: original oximeter software; revised software: revised oximeter software; SGA: small for gestational age; SGA NeOProM defined: small for gestational age as per definition used by NeOProM collaboration, i.e. less than 10th percentile using charts from Kramer et al.<sup>1</sup>

The subgroup analysis by oximeter software type (original vs revised) excludes n=74 infants in COT who were exposed to both the original and revised software.

Empty cells (.) indicate data not collected or not applicable in this trial.

These analyses exclude infants in SUPPORT and COT where values of Bayley-III were imputed for infants who had unsuccessful Bayley-III assessments due to severe developmental delay or autism.

\*\*\* Low / no event rate(s) makes parameter not estimable.

eTable 20. Bayley-III language <85, by subgroups

|           |                | Lower Oxygen Saturation Target |             | Higher Oxygen Saturation Target |             | Adjusted* Relative Risk (95% CI) |              |                     |
|-----------|----------------|--------------------------------|-------------|---------------------------------|-------------|----------------------------------|--------------|---------------------|
| Subgroup  | Trial          | n (%)                          | N           | n (%)                           | N           | Adjusted RR                      | p-value      | interaction p-value |
| GA<26 wks | SUPPORT        | 81 (48.2)                      | 168         | 108 (56.0)                      | 193         | 0.85 (0.69, 1.04)                | 0.116        | 0.354               |
|           | COT            | 76 (41.5)                      | 183         | 73 (41.5)                       | 176         | 0.99 (0.78, 1.25)                | 0.909        |                     |
|           | BOOST NZ       | 12 (30.0)                      | 40          | 13 (32.5)                       | 40          | 1.73 (0.77, 3.91)                | 0.187        |                     |
|           | BOOST II UK    | 29 (34.5)                      | 84          | 25 (28.7)                       | 87          | 1.21 (0.76, 1.91)                | 0.425        |                     |
|           | BOOST II AUS   | 48 (32.9)                      | 146         | 49 (29.3)                       | 167         | 1.11 (0.81, 1.51)                | 0.513        |                     |
|           | <b>NeOProM</b> | <b>246 (39.6)</b>              | <b>621</b>  | <b>268 (40.4)</b>               | <b>663</b>  | <b>0.97 (0.85, 1.10)</b>         | <b>0.623</b> |                     |
| GA≥26 wks | SUPPORT        | 122 (41.5)                     | 294         | 117 (38.4)                      | 305         | 1.08 (0.88, 1.32)                | 0.470        |                     |
|           | COT            | 100 (34.7)                     | 288         | 103 (35.0)                      | 294         | 0.95 (0.78, 1.16)                | 0.612        |                     |
|           | BOOST NZ       | 21 (30.0)                      | 70          | 19 (28.8)                       | 66          | 0.86 (0.50, 1.49)                | 0.586        |                     |
|           | BOOST II UK    | 42 (26.9)                      | 156         | 34 (21.3)                       | 160         | 1.28 (0.88, 1.84)                | 0.192        |                     |
|           | BOOST II AUS   | 62 (25.1)                      | 247         | 54 (21.9)                       | 247         | 1.15 (0.84, 1.58)                | 0.371        |                     |
|           | <b>NeOProM</b> | <b>347 (32.9)</b>              | <b>1055</b> | <b>327 (30.5)</b>               | <b>1072</b> | <b>1.05 (0.93, 1.18)</b>         | <b>0.432</b> |                     |
| Inborn    | SUPPORT        | 203 (43.9)                     | 462         | 225 (45.2)                      | 498         | 0.96 (0.83, 1.12)                | 0.618        | 0.532               |
|           | COT            | 164 (37.5)                     | 437         | 161 (37.5)                      | 429         | 0.97 (0.82, 1.14)                | 0.696        |                     |
|           | BOOST NZ       | 32 (30.8)                      | 104         | 31 (30.7)                       | 101         | 0.98 (0.64, 1.49)                | 0.908        |                     |
|           | BOOST II UK    | 63 (29.4)                      | 214         | 54 (24.5)                       | 220         | 1.22 (0.90, 1.65)                | 0.197        |                     |
|           | BOOST II AUS   | 103 (28.3)                     | 364         | 98 (24.9)                       | 393         | 1.12 (0.89, 1.40)                | 0.326        |                     |
|           | <b>NeOProM</b> | <b>565 (35.7)</b>              | <b>1581</b> | <b>569 (34.7)</b>               | <b>1641</b> | <b>1.01 (0.92, 1.10)</b>         | <b>0.862</b> |                     |
| Outborn   | SUPPORT        | .                              | .           | .                               | .           | .                                | .            |                     |
|           | COT            | 12 (35.3)                      | 34          | 15 (36.6)                       | 41          | 0.96 (0.53, 1.77)                | 0.904        |                     |
|           | BOOST NZ       | 1 (16.7)                       | 6           | 1 (20.0)                        | 5           | 0.83 (0.07, 10.2)                | 0.887        |                     |
|           | BOOST II UK    | 8 (30.8)                       | 26          | 5 (18.5)                        | 27          | 1.80 (0.62, 5.21)                | 0.276        |                     |
|           | BOOST II AUS   | 7 (24.1)                       | 29          | 5 (23.8)                        | 21          | 0.86 (0.33, 2.29)                | 0.769        |                     |
|           | <b>NeOProM</b> | <b>28 (29.5)</b>               | <b>95</b>   | <b>26 (27.7)</b>                | <b>94</b>   | <b>1.18 (0.76, 1.83)</b>         | <b>0.458</b> |                     |
| Vaginal   | SUPPORT        | 56 (38.9)                      | 144         | 68 (40.0)                       | 170         | 0.95 (0.71, 1.25)                | 0.701        | 0.414               |
|           | COT            | 71 (41.0)                      | 173         | 64 (34.0)                       | 188         | 1.20 (0.92, 1.56)                | 0.185        |                     |
|           | BOOST NZ       | 12 (26.7)                      | 45          | 16 (32.7)                       | 49          | 1.81 (0.66, 4.94)                | 0.249        |                     |
|           | BOOST II UK    | 42 (29.4)                      | 143         | 32 (23.0)                       | 139         | 1.26 (0.86, 1.86)                | 0.239        |                     |
|           | BOOST II AUS   | 50 (27.6)                      | 181         | 49 (26.6)                       | 184         | 1.03 (0.73, 1.43)                | 0.881        |                     |
|           | <b>NeOProM</b> | <b>231 (33.7)</b>              | <b>686</b>  | <b>229 (31.4)</b>               | <b>730</b>  | <b>1.07 (0.93, 1.24)</b>         | <b>0.345</b> |                     |
| Caesarean | SUPPORT        | 147 (46.2)                     | 318         | 157 (47.9)                      | 328         | 0.97 (0.81, 1.14)                | 0.685        |                     |
|           | COT            | 105 (35.2)                     | 298         | 111 (39.5)                      | 281         | 0.86 (0.72, 1.04)                | 0.120        |                     |
|           | BOOST NZ       | 21 (32.3)                      | 65          | 16 (28.1)                       | 57          | 1.06 (0.61, 1.87)                | 0.827        |                     |
|           | BOOST II UK    | 29 (29.9)                      | 97          | 27 (25.0)                       | 108         | 1.30 (0.84, 1.99)                | 0.236        |                     |
|           | BOOST II AUS   | 59 (28.0)                      | 211         | 53 (23.2)                       | 228         | 1.20 (0.89, 1.62)                | 0.229        |                     |
|           | <b>NeOProM</b> | <b>361 (36.5)</b>              | <b>989</b>  | <b>364 (36.3)</b>               | <b>1002</b> | <b>0.99 (0.88, 1.10)</b>         | <b>0.795</b> |                     |
| ANS - No  | SUPPORT        | 5 (29.4)                       | 17          | 10 (41.7)                       | 24          | 0.69 (0.28, 1.67)                | 0.405        | 0.394               |
|           | COT            | 22 (47.8)                      | 46          | 23 (56.1)                       | 41          | 0.62 (0.27, 1.45)                | 0.274        |                     |
|           | BOOST NZ       | 5 (38.5)                       | 13          | 4 (40.0)                        | 10          | 0.96 (0.35, 2.68)                | 0.959        |                     |
|           | BOOST II UK    | 4 (25.0)                       | 16          | 4 (25.0)                        | 16          | 1.03 (0.33, 3.20)                | 0.957        |                     |

eTable 20. Bayley-III language <85, by subgroups (continued)

|             |                | Lower Oxygen Saturation Target |             | Higher Oxygen Saturation Target |             | Adjusted* Relative Risk (95% CI) |              |                     |
|-------------|----------------|--------------------------------|-------------|---------------------------------|-------------|----------------------------------|--------------|---------------------|
| Subgroup    | Trial          | n (%)                          | N           | n (%)                           | N           | Adjusted RR                      | p-value      | interaction p-value |
|             | BOOST II AUS   | 10 (25.6)                      | 39          | 8 (29.6)                        | 27          | 0.77 (0.34, 1.75)                | 0.538        |                     |
|             | <b>NeOProM</b> | <b>46 (35.1)</b>               | <b>131</b>  | <b>49 (41.5)</b>                | <b>118</b>  | <b>0.89 (0.66, 1.20)</b>         | <b>0.446</b> |                     |
| ANS - Yes   | SUPPORT        | 198 (44.5)                     | 445         | 215 (45.4)                      | 474         | 0.98 (0.84, 1.13)                | 0.748        |                     |
|             | COT            | 153 (36.1)                     | 424         | 153 (35.7)                      | 429         | 0.98 (0.83, 1.16)                | 0.819        |                     |
|             | BOOST NZ       | 28 (28.9)                      | 97          | 28 (29.2)                       | 96          | 0.97 (0.61, 1.53)                | 0.884        |                     |
|             | BOOST II UK    | 67 (30.0)                      | 223         | 54 (23.6)                       | 229         | 1.30 (0.96, 1.76)                | 0.091        |                     |
|             | BOOST II AUS   | 98 (27.8)                      | 352         | 95 (24.8)                       | 383         | 1.10 (0.87, 1.38)                | 0.423        |                     |
|             | <b>NeOProM</b> | <b>544 (35.3)</b>              | <b>1541</b> | <b>545 (33.8)</b>               | <b>1611</b> | <b>1.02 (0.93, 1.12)</b>         | <b>0.652</b> |                     |
| Male        | SUPPORT        | 117 (50.9)                     | 230         | 145 (52.9)                      | 274         | 0.94 (0.79, 1.13)                | 0.525        | 0.395               |
|             | COT            | 117 (45.7)                     | 256         | 105 (43.6)                      | 241         | 1.02 (0.84, 1.23)                | 0.876        |                     |
|             | BOOST NZ       | 21 (39.6)                      | 53          | 24 (42.1)                       | 57          | 0.94 (0.60, 1.48)                | 0.792        |                     |
|             | BOOST II UK    | 42 (34.7)                      | 121         | 34 (27.6)                       | 123         | 1.33 (0.93, 1.89)                | 0.120        |                     |
|             | BOOST II AUS   | 76 (39.0)                      | 195         | 59 (28.5)                       | 207         | 1.40 (1.06, 1.83)                | 0.016        |                     |
|             | <b>NeOProM</b> | <b>373 (43.6)</b>              | <b>855</b>  | <b>367 (40.7)</b>               | <b>902</b>  | <b>1.05 (0.94, 1.17)</b>         | <b>0.353</b> |                     |
| Female      | SUPPORT        | 86 (37.1)                      | 232         | 80 (35.7)                       | 224         | 1.02 (0.79, 1.30)                | 0.900        |                     |
|             | COT            | 59 (27.4)                      | 215         | 71 (31.0)                       | 229         | 0.86 (0.66, 1.13)                | 0.284        |                     |
|             | BOOST NZ       | 12 (21.1)                      | 57          | 8 (16.3)                        | 49          | 1.29 (0.57, 2.90)                | 0.621        |                     |
|             | BOOST II UK    | 29 (24.4)                      | 119         | 25 (20.2)                       | 124         | 1.25 (0.80, 1.95)                | 0.330        |                     |
|             | BOOST II AUS   | 34 (17.2)                      | 198         | 44 (21.3)                       | 207         | 0.80 (0.54, 1.18)                | 0.259        |                     |
|             | <b>NeOProM</b> | <b>220 (26.8)</b>              | <b>821</b>  | <b>228 (27.4)</b>               | <b>833</b>  | <b>0.95 (0.82, 1.11)</b>         | <b>0.530</b> |                     |
| Singleton   | SUPPORT        | 151 (43.5)                     | 347         | 167 (44.8)                      | 373         | 0.97 (0.82, 1.15)                | 0.735        | 0.258               |
|             | COT            | 127 (39.8)                     | 319         | 115 (35.7)                      | 322         | 1.11 (0.91, 1.36)                | 0.285        |                     |
|             | BOOST NZ       | 23 (27.7)                      | 83          | 22 (26.8)                       | 82          | 1.03 (0.63, 1.70)                | 0.899        |                     |
|             | BOOST II UK    | 41 (25.0)                      | 164         | 41 (23.3)                       | 176         | 1.07 (0.74, 1.56)                | 0.714        |                     |
|             | BOOST II AUS   | 82 (28.0)                      | 293         | 77 (24.4)                       | 315         | 1.14 (0.88, 1.50)                | 0.321        |                     |
|             | <b>NeOProM</b> | <b>424 (35.2)</b>              | <b>1206</b> | <b>422 (33.3)</b>               | <b>1268</b> | <b>1.05 (0.94, 1.17)</b>         | <b>0.377</b> |                     |
| Multiple    | SUPPORT        | 52 (45.2)                      | 115         | 58 (46.4)                       | 125         | 0.93 (0.67, 1.28)                | 0.658        |                     |
|             | COT            | 49 (32.2)                      | 152         | 61 (41.2)                       | 148         | 0.76 (0.60, 0.97)                | 0.026        |                     |
|             | BOOST NZ       | 10 (37.0)                      | 27          | 10 (41.7)                       | 24          | 0.88 (0.47, 1.65)                | 0.691        |                     |
|             | BOOST II UK    | 30 (39.5)                      | 76          | 18 (25.4)                       | 71          | 1.54 (1.01, 2.34)                | 0.046        |                     |
|             | BOOST II AUS   | 28 (28.0)                      | 100         | 26 (26.3)                       | 99          | 1.07 (0.72, 1.58)                | 0.733        |                     |
|             | <b>NeOProM</b> | <b>169 (36.0)</b>              | <b>470</b>  | <b>173 (37.0)</b>               | <b>467</b>  | <b>0.95 (0.81, 1.10)</b>         | <b>0.480</b> |                     |
| start<6 hrs | SUPPORT        | 198 (43.8)                     | 452         | 221 (45.3)                      | 488         | 0.96 (0.83, 1.11)                | 0.588        | 0.551               |
|             | COT            | 6 (27.3)                       | 22          | 10 (47.6)                       | 21          | 0.57 (0.25, 1.32)                | 0.191        |                     |
|             | BOOST NZ       | 13 (65.0)                      | 20          | 6 (33.3)                        | 18          | 2.72 (0.54, 13.8)                | 0.227        |                     |
|             | BOOST II UK    |                                | .           |                                 | .           |                                  | .            |                     |
|             | BOOST II AUS   | 10 (27.0)                      | 37          | 14 (29.2)                       | 48          | 0.93 (0.46, 1.87)                | 0.831        |                     |
|             | <b>NeOProM</b> | <b>227 (42.7)</b>              | <b>531</b>  | <b>251 (43.7)</b>               | <b>575</b>  | <b>0.97 (0.84, 1.11)</b>         | <b>0.629</b> |                     |
| >=6 hrs     | SUPPORT        | 2 (50.0)                       | 4           | 0                               | 4           |                                  | ***          |                     |
|             | COT            | 170 (37.9)                     | 449         | 166 (37.0)                      | 449         | 0.99 (0.85, 1.16)                | 0.899        |                     |
|             | BOOST NZ       | 20 (22.2)                      | 90          | 26 (29.5)                       | 88          | 0.74 (0.44, 1.23)                | 0.239        |                     |

eTable 20. Bayley-III language <85, by subgroups (continued)

|                            |                | Lower Oxygen Saturation Target |             | Higher Oxygen Saturation Target |             | Adjusted* Relative Risk (95% CI) |              |                     |
|----------------------------|----------------|--------------------------------|-------------|---------------------------------|-------------|----------------------------------|--------------|---------------------|
| Subgroup                   | Trial          | n (%)                          | N           | n (%)                           | N           | Adjusted RR                      | p-value      | interaction p-value |
|                            | BOOST II UK    |                                | .           |                                 | .           |                                  | .            |                     |
|                            | BOOST II AUS   | 100 (28.2)                     | 355         | 89 (24.3)                       | 366         | 1.17 (0.92, 1.48)                | 0.196        |                     |
|                            | <b>NeOProM</b> | <b>292 (32.5)</b>              | <b>898</b>  | <b>281 (31.0)</b>               | <b>907</b>  | <b>1.02 (0.90, 1.16)</b>         | <b>0.723</b> |                     |
| Original software          | SUPPORT        | 203 (43.9)                     | 462         | 225 (45.2)                      | 498         | 0.96 (0.83, 1.12)                | 0.618        | 0.184               |
|                            | COT            | 78 (35.5)                      | 220         | 83 (39.2)                       | 212         | 0.89 (0.71, 1.11)                | 0.284        |                     |
|                            | BOOST NZ       | 33 (30.0)                      | 110         | 32 (30.2)                       | 106         | 0.97 (0.64, 1.47)                | 0.876        |                     |
|                            | BOOST II UK    | 21 (38.9)                      | 54          | 13 (24.5)                       | 53          | 1.72 (0.93, 3.17)                | 0.083        |                     |
|                            | BOOST II AUS   | 63 (26.3)                      | 240         | 62 (24.2)                       | 256         | 1.07 (0.80, 1.43)                | 0.664        |                     |
|                            | <b>NeOProM</b> | <b>398 (36.6)</b>              | <b>1086</b> | <b>415 (36.9)</b>               | <b>1125</b> | <b>0.98 (0.88, 1.09)</b>         | <b>0.654</b> |                     |
| Revised software           | SUPPORT        |                                | .           |                                 | .           |                                  | .            |                     |
|                            | COT            | 86 (38.7)                      | 222         | 77 (34.7)                       | 222         | 1.05 (0.84, 1.32)                | 0.669        |                     |
|                            | BOOST NZ       |                                | .           |                                 | .           |                                  | .            |                     |
|                            | BOOST II UK    | 50 (26.9)                      | 186         | 46 (23.7)                       | 194         | 1.15 (0.83, 1.61)                | 0.402        |                     |
|                            | BOOST II AUS   | 47 (30.7)                      | 153         | 41 (25.9)                       | 158         | 1.25 (0.89, 1.77)                | 0.196        |                     |
|                            | <b>NeOProM</b> | <b>183 (32.6)</b>              | <b>561</b>  | <b>164 (28.6)</b>               | <b>574</b>  | <b>1.11 (0.94, 1.32)</b>         | <b>0.201</b> |                     |
| SGA: Trialist defined - No | SUPPORT        | 194 (43.5)                     | 446         | 202 (43.8)                      | 461         | 0.98 (0.84, 1.14)                | 0.775        | 0.843               |
|                            | COT            | 158 (36.6)                     | 432         | 161 (36.9)                      | 436         | 0.96 (0.82, 1.13)                | 0.640        |                     |
|                            | BOOST II NZ    | 26 (27.4)                      | 95          | 30 (30.6)                       | 98          | 0.85 (0.56, 1.28)                | 0.434        |                     |
|                            | BOOST II UK    | 63 (30.3)                      | 208         | 46 (21.9)                       | 210         | 1.39 (1.01, 1.93)                | 0.046        |                     |
|                            | BOOST II AUS   | 91 (26.5)                      | 344         | 87 (24.3)                       | 358         | 1.09 (0.85, 1.39)                | 0.498        |                     |
|                            | <b>NeOProM</b> | <b>532 (34.9)</b>              | <b>1525</b> | <b>526 (33.7)</b>               | <b>1563</b> | <b>1.01 (0.92, 1.11)</b>         | <b>0.791</b> |                     |
| Yes                        | SUPPORT        | 9 (56.3)                       | 16          | 23 (62.2)                       | 37          | 0.92 (0.55, 1.52)                | 0.735        |                     |
|                            | COT            | 18 (46.2)                      | 39          | 15 (44.1)                       | 34          | 1.04 (0.63, 1.73)                | 0.879        |                     |
|                            | BOOST II NZ    | 7 (46.7)                       | 15          | 2 (25.0)                        | 8           | 1.75 (0.47, 6.57)                | 0.408        |                     |
|                            | BOOST II UK    | 8 (25.8)                       | 31          | 13 (35.1)                       | 37          | 0.73 (0.35, 1.54)                | 0.414        |                     |
|                            | BOOST II AUS   | 19 (38.8)                      | 49          | 16 (28.6)                       | 56          | 1.36 (0.79, 2.34)                | 0.271        |                     |
|                            | <b>NeOProM</b> | <b>61 (40.7)</b>               | <b>150</b>  | <b>69 (40.1)</b>                | <b>172</b>  | <b>1.04 (0.80, 1.35)</b>         | <b>0.792</b> |                     |
| SGA: NeOProM defined - No  | SUPPORT        | 169 (42.0)                     | 402         | 182 (43.3)                      | 420         | 0.96 (0.81, 1.13)                | 0.584        | 0.580               |
|                            | COT            | 158 (36.6)                     | 432         | 161 (36.9)                      | 436         | 0.96 (0.82, 1.13)                | 0.640        |                     |
|                            | BOOST II NZ    | 26 (27.4)                      | 95          | 30 (30.6)                       | 98          | 0.85 (0.56, 1.28)                | 0.434        |                     |
|                            | BOOST II UK    | 66 (30.3)                      | 218         | 50 (22.5)                       | 222         | 1.35 (0.99, 1.85)                | 0.060        |                     |
|                            | BOOST II AUS   | 91 (26.5)                      | 344         | 87 (24.3)                       | 358         | 1.09 (0.85, 1.39)                | 0.498        |                     |
|                            | <b>NeOProM</b> | <b>510 (34.2)</b>              | <b>1491</b> | <b>510 (33.2)</b>               | <b>1534</b> | <b>1.00 (0.91, 1.11)</b>         | <b>0.935</b> |                     |
| Yes                        | SUPPORT        | 34 (56.7)                      | 60          | 43 (55.1)                       | 78          | 1.02 (0.75, 1.39)                | 0.888        |                     |
|                            | COT            | 18 (46.2)                      | 39          | 15 (44.1)                       | 34          | 1.04 (0.63, 1.73)                | 0.879        |                     |
|                            | BOOST II NZ    | 7 (46.7)                       | 15          | 2 (25.0)                        | 8           | 1.75 (0.47, 6.57)                | 0.408        |                     |
|                            | BOOST II UK    | 5 (22.7)                       | 22          | 9 (36.0)                        | 25          | 0.63 (0.25, 1.60)                | 0.333        |                     |
|                            | BOOST II AUS   | 19 (38.8)                      | 49          | 16 (28.6)                       | 56          | 1.36 (0.79, 2.34)                | 0.271        |                     |
|                            | <b>NeOProM</b> | <b>83 (44.9)</b>               | <b>185</b>  | <b>85 (42.3)</b>                | <b>201</b>  | <b>0.39 (0.16, 0.93)</b>         | <b>0.033</b> |                     |

\* Analysis adjusted for trials and multiple births

## Abbreviations/definitions

CI: confidence interval; RR: relative risk; GA: gestational age; SUPPORT: Surfactant Positive Airway Pressure and Pulse Oximetry Trial; COT: Canadian Oxygen Trial; BOOST: Benefits of Oxygen Saturation Targeting; NZ: New Zealand; UK: United Kingdom; AUS: Australia; NeOProM: Neonatal Oxygenation Prospective Meta-analysis; inborn: born inside the treating center; outborn: born outside the treating center (e.g. transferred from another hospital); vaginal: mode of delivery through the vagina; Caesarean: mode of delivery via surgical procedure; ANS: antenatal corticosteroids; singleton: child born as a single birth; multiple: more than one child per birth; start<6 hrs: intervention commenced less than 6 hours after birth; start>=6 hrs: intervention commenced greater than or equal to 6 hours after birth; original software: original oximeter software; revised software: revised oximeter software; SGA: small for gestational age; SGA NeOProM defined: small for gestational age as per definition used by NeOProM collaboration, i.e. less than 10th percentile using charts from Kramer et al.<sup>1</sup>

The subgroup analysis by oximeter software type (original vs revised) excludes n=74 infants in COT who were exposed to both the original and revised software.

Empty cells (.) indicate data not collected or not applicable in this trial.

These analyses exclude infants in SUPPORT and COT where values of Bayley-III were imputed for infants who had unsuccessful Bayley-III assessments due to severe developmental delay or autism.

\*\*\* Low / no event rate(s) makes parameter not estimable.

eTable 21. Bayley-III language or cognitive <70, by subgroups

|           |                | Lower Oxygen Saturation Target |             | Higher Oxygen Saturation Target |             | Adjusted* Relative Risk (95% CI) |              |                     |
|-----------|----------------|--------------------------------|-------------|---------------------------------|-------------|----------------------------------|--------------|---------------------|
| Subgroup  | Trial          | n (%)                          | N           | n (%)                           | N           | Adjusted RR                      | p-value      | interaction p-value |
| GA<26 wks | SUPPORT        | 33 (19.5)                      | 169         | 54 (27.4)                       | 197         | 0.68 (0.45, 1.01)                | 0.054        | 0.191               |
|           | COT            | 29 (16.4)                      | 177         | 33 (18.9)                       | 175         | 0.86 (0.55, 1.34)                | 0.502        |                     |
|           | BOOST NZ       | 1 (2.5)                        | 40          | 2 (4.5)                         | 44          | 0.55 (0.05, 5.59)                | 0.615        |                     |
|           | BOOST II UK    | 15 (17.4)                      | 86          | 15 (16.7)                       | 90          | 1.18 (0.55, 2.55)                | 0.669        |                     |
|           | BOOST II AUS   | 19 (12.6)                      | 151         | 20 (11.7)                       | 171         | 1.03 (0.59, 1.80)                | 0.923        |                     |
|           | <b>NeOProM</b> | <b>97 (15.6)</b>               | <b>623</b>  | <b>124 (18.3)</b>               | <b>677</b>  | <b>0.83 (0.65, 1.06)</b>         | <b>0.141</b> |                     |
| GA≥26 wks | SUPPORT        | 39 (12.9)                      | 303         | 41 (13.3)                       | 308         | 0.94 (0.62, 1.45)                | 0.790        |                     |
|           | COT            | 31 (11.2)                      | 276         | 32 (11.2)                       | 286         | 0.91 (0.56, 1.47)                | 0.693        |                     |
|           | BOOST NZ       | 6 (7.9)                        | 76          | 2 (2.9)                         | 70          | 2.80 (0.61, 12.8)                | 0.184        |                     |
|           | BOOST II UK    | 19 (11.9)                      | 159         | 14 (8.3)                        | 169         | 1.45 (0.73, 2.88)                | 0.285        |                     |
|           | BOOST II AUS   | 19 (7.5)                       | 255         | 19 (7.5)                        | 255         | 1.07 (0.58, 1.98)                | 0.818        |                     |
|           | <b>NeOProM</b> | <b>114 (10.7)</b>              | <b>1069</b> | <b>108 (9.9)</b>                | <b>1088</b> | <b>1.06 (0.81, 1.37)</b>         | <b>0.687</b> |                     |
| Inborn    | SUPPORT        | 72 (15.3)                      | 472         | 95 (18.8)                       | 505         | 0.79 (0.59, 1.05)                | 0.104        | 0.966               |
|           | COT            | 54 (12.8)                      | 421         | 58 (13.8)                       | 421         | 0.89 (0.63, 1.25)                | 0.492        |                     |
|           | BOOST NZ       | 7 (6.4)                        | 110         | 4 (3.7)                         | 109         | 1.75 (0.53, 5.81)                | 0.358        |                     |
|           | BOOST II UK    | 31 (14.2)                      | 219         | 25 (10.8)                       | 231         | 1.37 (0.80, 2.36)                | 0.257        |                     |
|           | BOOST II AUS   | 36 (9.5)                       | 377         | 38 (9.4)                        | 405         | 1.02 (0.67, 1.55)                | 0.938        |                     |
|           | <b>NeOProM</b> | <b>200 (12.5)</b>              | <b>1599</b> | <b>220 (13.2)</b>               | <b>1671</b> | <b>0.93 (0.78, 1.12)</b>         | <b>0.460</b> |                     |
| Outborn   | SUPPORT        | .                              | .           | .                               | .           | .                                | .            |                     |
|           | COT            | 6 (18.8)                       | 32          | 7 (17.5)                        | 40          | 1.07 (0.48, 2.37)                | 0.868        |                     |
|           | BOOST NZ       | 0                              | 6           | 0                               | 5           |                                  | ***          |                     |
|           | BOOST II UK    | 3 (11.5)                       | 26          | 4 (14.3)                        | 28          | 0.82 (0.21, 3.26)                | 0.781        |                     |
|           | BOOST II AUS   | 2 (6.9)                        | 29          | 1 (4.8)                         | 21          | 1.43 (0.15, 13.2)                | 0.754        |                     |
|           | <b>NeOProM</b> | <b>11 (11.8)</b>               | <b>93</b>   | <b>12 (12.8)</b>                | <b>94</b>   | <b>1.02 (0.48, 2.18)</b>         | <b>0.964</b> |                     |
| Vaginal   | SUPPORT        | 19 (13.0)                      | 146         | 32 (18.4)                       | 174         | 0.62 (0.36, 1.07)                | 0.083        | 0.870               |
|           | COT            | 24 (14.4)                      | 167         | 29 (15.2)                       | 191         | 0.95 (0.58, 1.55)                | 0.824        |                     |
|           | BOOST NZ       | 2 (4.3)                        | 47          | 1 (2.0)                         | 51          | 2.16 (0.21, 22.4)                | 0.519        |                     |
|           | BOOST II UK    | 18 (12.4)                      | 145         | 16 (10.9)                       | 147         | 1.14 (0.59, 2.19)                | 0.697        |                     |
|           | BOOST II AUS   | 18 (9.4)                       | 191         | 17 (8.9)                        | 191         | 1.06 (0.56, 2.01)                | 0.851        |                     |
|           | <b>NeOProM</b> | <b>81 (11.6)</b>               | <b>696</b>  | <b>95 (12.6)</b>                | <b>754</b>  | <b>0.92 (0.69, 1.21)</b>         | <b>0.538</b> |                     |
| Caesarean | SUPPORT        | 53 (16.3)                      | 326         | 63 (19.0)                       | 331         | 0.84 (0.60, 1.19)                | 0.335        |                     |
|           | COT            | 36 (12.6)                      | 286         | 36 (13.4)                       | 269         | 0.88 (0.57, 1.37)                | 0.569        |                     |
|           | BOOST NZ       | 5 (7.2)                        | 69          | 3 (4.8)                         | 63          | 1.54 (0.39, 6.02)                | 0.537        |                     |
|           | BOOST II UK    | 16 (16.0)                      | 100         | 13 (11.6)                       | 112         | 1.44 (0.70, 2.95)                | 0.319        |                     |
|           | BOOST II AUS   | 19 (8.9)                       | 214         | 21 (9.0)                        | 233         | 1.04 (0.61, 1.79)                | 0.884        |                     |
|           | <b>NeOProM</b> | <b>129 (13.0)</b>              | <b>995</b>  | <b>136 (13.5)</b>               | <b>1008</b> | <b>0.95 (0.75, 1.19)</b>         | <b>0.647</b> |                     |
| ANS - No  | SUPPORT        | 3 (17.6)                       | 17          | 5 (20.8)                        | 24          | 0.93 (0.24, 3.59)                | 0.912        | 0.175               |
|           | COT            | 10 (21.7)                      | 46          | 15 (36.6)                       | 41          | 0.58 (0.29, 1.17)                | 0.130        |                     |
|           | BOOST NZ       | 0                              | 13          | 0                               | 10          |                                  | ***          |                     |
|           | BOOST II UK    | 1 (6.3)                        | 16          | 2 (11.1)                        | 18          | 0.57 (0.06, 5.57)                | 0.628        |                     |

eTable 21. Bayley-III language or cognitive <70, by subgroups (continued)

|             |                | Lower Oxygen Saturation Target |             | Higher Oxygen Saturation Target |             | Adjusted* Relative Risk (95% CI) |              |                     |
|-------------|----------------|--------------------------------|-------------|---------------------------------|-------------|----------------------------------|--------------|---------------------|
| Subgroup    | Trial          | n (%)                          | N           | n (%)                           | N           | Adjusted RR                      | p-value      | interaction p-value |
|             | BOOST II AUS   | 3 (7.3)                        | 41          | 4 (14.8)                        | 27          | 0.43 (0.11, 1.72)                | 0.232        |                     |
|             | <b>NeOProM</b> | <b>17 (12.8)</b>               | <b>133</b>  | <b>26 (21.7)</b>                | <b>120</b>  | <b>0.61 (0.36, 1.05)</b>         | <b>0.081</b> |                     |
| ANS - Yes   | SUPPORT        | 69 (15.2)                      | 455         | 90 (18.7)                       | 481         | 0.79 (0.59, 1.06)                | 0.122        |                     |
|             | COT            | 50 (12.3)                      | 406         | 50 (11.9)                       | 420         | 0.97 (0.67, 1.39)                | 0.859        |                     |
|             | BOOST NZ       | 7 (6.8)                        | 103         | 4 (3.8)                         | 104         | 1.79 (0.54, 5.90)                | 0.341        |                     |
|             | BOOST II UK    | 33 (14.5)                      | 228         | 26 (10.9)                       | 239         | 1.37 (0.81, 2.31)                | 0.236        |                     |
|             | BOOST II AUS   | 35 (9.6)                       | 363         | 35 (8.9)                        | 395         | 1.06 (0.69, 1.63)                | 0.783        |                     |
|             | <b>NeOProM</b> | <b>194 (12.5)</b>              | <b>1555</b> | <b>205 (12.5)</b>               | <b>1639</b> | <b>0.98 (0.81, 1.18)</b>         | <b>0.793</b> |                     |
| Male        | SUPPORT        | 43 (18.2)                      | 236         | 63 (22.7)                       | 278         | 0.79 (0.55, 1.13)                | 0.197        | 0.912               |
|             | COT            | 43 (17.1)                      | 251         | 45 (19.0)                       | 237         | 0.86 (0.58, 1.28)                | 0.461        |                     |
|             | BOOST NZ       | 3 (5.2)                        | 58          | 4 (6.8)                         | 59          | 0.75 (0.18, 3.13)                | 0.690        |                     |
|             | BOOST II UK    | 20 (16.3)                      | 123         | 17 (13.0)                       | 131         | 1.26 (0.68, 2.33)                | 0.467        |                     |
|             | BOOST II AUS   | 29 (14.4)                      | 201         | 22 (10.4)                       | 212         | 1.31 (0.76, 2.26)                | 0.332        |                     |
|             | <b>NeOProM</b> | <b>138 (15.9)</b>              | <b>869</b>  | <b>151 (16.5)</b>               | <b>917</b>  | <b>0.95 (0.76, 1.18)</b>         | <b>0.622</b> |                     |
| Female      | SUPPORT        | 29 (12.3)                      | 236         | 32 (14.1)                       | 227         | 0.83 (0.51, 1.35)                | 0.448        |                     |
|             | COT            | 17 (8.4)                       | 202         | 20 (8.9)                        | 224         | 0.95 (0.53, 1.71)                | 0.863        |                     |
|             | BOOST NZ       | 4 (6.9)                        | 58          | 0                               | 55          |                                  | ***          |                     |
|             | BOOST II UK    | 14 (11.5)                      | 122         | 12 (9.4)                        | 128         | 1.29 (0.53, 3.14)                | 0.574        |                     |
|             | BOOST II AUS   | 9 (4.4)                        | 205         | 17 (7.9)                        | 214         | 0.55 (0.25, 1.21)                | 0.138        |                     |
|             | <b>NeOProM</b> | <b>73 (8.9)</b>                | <b>823</b>  | <b>81 (9.6)</b>                 | <b>848</b>  | <b>0.91 (0.67, 1.24)</b>         | <b>0.548</b> |                     |
| Singleton   | SUPPORT        | 51 (14.5)                      | 351         | 75 (19.8)                       | 379         | 0.73 (0.53, 1.02)                | 0.062        | 0.776               |
|             | COT            | 42 (13.6)                      | 309         | 39 (12.1)                       | 322         | 1.12 (0.75, 1.69)                | 0.579        |                     |
|             | BOOST NZ       | 5 (5.9)                        | 85          | 3 (3.4)                         | 87          | 1.71 (0.42, 6.92)                | 0.455        |                     |
|             | BOOST II UK    | 16 (9.8)                       | 164         | 17 (9.3)                        | 183         | 1.05 (0.55, 2.01)                | 0.882        |                     |
|             | BOOST II AUS   | 30 (9.8)                       | 305         | 27 (8.3)                        | 326         | 1.19 (0.72, 1.95)                | 0.497        |                     |
|             | <b>NeOProM</b> | <b>144 (11.9)</b>              | <b>1214</b> | <b>161 (12.4)</b>               | <b>1297</b> | <b>0.95 (0.77, 1.17)</b>         | <b>0.619</b> |                     |
| Multiple    | SUPPORT        | 21 (17.4)                      | 121         | 20 (15.9)                       | 126         | 1.07 (0.55, 2.06)                | 0.846        |                     |
|             | COT            | 18 (12.5)                      | 144         | 26 (18.7)                       | 139         | 0.62 (0.37, 1.04)                | 0.071        |                     |
|             | BOOST NZ       | 2 (6.5)                        | 31          | 1 (3.7)                         | 27          | 1.81 (0.17, 19.0)                | 0.619        |                     |
|             | BOOST II UK    | 18 (22.2)                      | 81          | 12 (15.8)                       | 76          | 1.44 (0.72, 2.87)                | 0.305        |                     |
|             | BOOST II AUS   | 8 (7.9)                        | 101         | 12 (12.0)                       | 100         | 0.71 (0.34, 1.48)                | 0.360        |                     |
|             | <b>NeOProM</b> | <b>67 (14.0)</b>               | <b>478</b>  | <b>71 (15.2)</b>                | <b>468</b>  | <b>0.90 (0.66, 1.23)</b>         | <b>0.501</b> |                     |
| start<6 hrs | SUPPORT        | 70 (15.2)                      | 461         | 93 (18.8)                       | 495         | 0.78 (0.58, 1.05)                | 0.100        | 0.356               |
|             | COT            | 3 (14.3)                       | 21          | 4 (20.0)                        | 20          | 0.73 (0.19, 2.77)                | 0.641        |                     |
|             | BOOST NZ       | 5 (22.7)                       | 22          | 1 (4.8)                         | 21          | 5.10 (0.70, 36.9)                | 0.107        |                     |
|             | BOOST II UK    |                                | .           |                                 | .           |                                  | .            |                     |
|             | BOOST II AUS   | 3 (7.7)                        | 39          | 7 (14.3)                        | 49          | 0.56 (0.16, 1.99)                | 0.368        |                     |
|             | <b>NeOProM</b> | <b>81 (14.9)</b>               | <b>543</b>  | <b>105 (17.9)</b>               | <b>585</b>  | <b>0.80 (0.60, 1.06)</b>         | <b>0.116</b> |                     |
| >=6 hrs     | SUPPORT        | 1 (20.0)                       | 5           | 0                               | 4           |                                  | ***          |                     |
|             | COT            | 57 (13.2)                      | 432         | 61 (13.8)                       | 441         | 0.91 (0.65, 1.27)                | 0.568        |                     |
|             | BOOST NZ       | 2 (2.1)                        | 94          | 3 (3.2)                         | 93          | 0.66 (0.11, 3.89)                | 0.648        |                     |



eTable 21. Bayley-III language or cognitive <70, by subgroups (continued)

|           |                | Lower Oxygen Saturation Target |             | Higher Oxygen Saturation Target |             | Adjusted* Relative Risk (95% CI) |              |                     |
|-----------|----------------|--------------------------------|-------------|---------------------------------|-------------|----------------------------------|--------------|---------------------|
| Subgroup  | Trial          | n (%)                          | N           | n (%)                           | N           | Adjusted RR                      | p-value      | interaction p-value |
|           | BOOST II UK    |                                | .           |                                 | .           |                                  | .            |                     |
|           | BOOST II AUS   | 35 (9.6)                       | 366         | 32 (8.5)                        | 377         | 1.16 (0.76, 1.79)                | 0.493        |                     |
|           | <b>NeOProM</b> | <b>95 (10.6)</b>               | <b>897</b>  | <b>96 (10.5)</b>                | <b>915</b>  | <b>0.98 (0.75, 1.27)</b>         | <b>0.858</b> |                     |
| Original  | SUPPORT        | 72 (15.3)                      | 472         | 95 (18.8)                       | 505         | 0.79 (0.59, 1.05)                | 0.104        | 0.622               |
| software  | COT            | 29 (13.7)                      | 212         | 30 (14.2)                       | 211         | 0.97 (0.63, 1.52)                | 0.908        |                     |
|           | BOOST NZ       | 7 (6.0)                        | 116         | 4 (3.5)                         | 114         | 1.74 (0.52, 5.76)                | 0.365        |                     |
|           | BOOST II UK    | 8 (14.8)                       | 54          | 8 (13.8)                        | 58          | 3.37 (0.62, 18.4)                | 0.161        |                     |
|           | BOOST II AUS   | 24 (9.5)                       | 252         | 21 (8.0)                        | 263         | 1.17 (0.67, 2.03)                | 0.578        |                     |
|           | <b>NeOProM</b> | <b>140 (12.7)</b>              | <b>1106</b> | <b>158 (13.7)</b>               | <b>1151</b> | <b>0.92 (0.75, 1.14)</b>         | <b>0.461</b> |                     |
| Revised   | SUPPORT        |                                | .           |                                 | .           |                                  | .            |                     |
| software  | COT            | 29 (13.6)                      | 214         | 28 (13.1)                       | 213         | 0.90 (0.54, 1.49)                | 0.679        |                     |
|           | BOOST NZ       |                                | .           |                                 | .           |                                  | .            |                     |
|           | BOOST II UK    | 26 (13.6)                      | 191         | 21 (10.4)                       | 201         | 1.30 (0.76, 2.21)                | 0.335        |                     |
|           | BOOST II AUS   | 14 (9.1)                       | 154         | 18 (11.0)                       | 163         | 0.84 (0.45, 1.57)                | 0.585        |                     |
|           | <b>NeOProM</b> | <b>69 (12.3)</b>               | <b>559</b>  | <b>67 (11.6)</b>                | <b>577</b>  | <b>1.04 (0.75, 1.43)</b>         | <b>0.814</b> |                     |
| SGA:      | SUPPORT        | 66 (14.5)                      | 456         | 78 (16.7)                       | 467         | 0.83 (0.61, 1.14)                | 0.248        | 0.033               |
| Trialist  | COT            | 57 (13.8)                      | 414         | 59 (13.8)                       | 428         | 0.96 (0.69, 1.34)                | 0.813        |                     |
| defined - | BOOST II NZ    | 3 (3.0)                        | 101         | 2 (1.9)                         | 106         | 1.58 (0.27, 9.12)                | 0.612        |                     |
| No        | BOOST II UK    | 32 (15.2)                      | 211         | 23 (10.4)                       | 222         | 1.48 (0.87, 2.54)                | 0.151        |                     |
|           | BOOST II AUS   | 34 (9.6)                       | 356         | 30 (8.2)                        | 368         | 1.13 (0.71, 1.78)                | 0.615        |                     |
|           | <b>NeOProM</b> | <b>192 (12.5)</b>              | <b>1538</b> | <b>192 (12.1)</b>               | <b>1591</b> | <b>1.00 (0.82, 1.21)</b>         | <b>0.976</b> |                     |
| Yes       | SUPPORT        | 6 (37.5)                       | 16          | 17 (44.7)                       | 38          | 0.82 (0.40, 1.69)                | 0.587        |                     |
|           | COT            | 3 (7.7)                        | 39          | 6 (18.2)                        | 33          | 0.69 (0.43, 1.11)                | 0.129        |                     |
|           | BOOST II NZ    | 4 (26.7)                       | 15          | 2 (25.0)                        | 8           | 1.00 (0.23, 4.35)                | 0.999        |                     |
|           | BOOST II UK    | 2 (6.1)                        | 33          | 6 (16.2)                        | 37          | 0.38 (0.08, 1.74)                | 0.210        |                     |
|           | BOOST II AUS   | 4 (8.0)                        | 50          | 9 (15.5)                        | 58          | 0.52 (0.17, 1.57)                | 0.244        |                     |
|           | <b>NeOProM</b> | <b>19 (12.4)</b>               | <b>153</b>  | <b>40 (23.0)</b>                | <b>174</b>  | <b>0.64 (0.39, 1.05)</b>         | <b>0.080</b> |                     |
| SGA:      | SUPPORT        | 53 (12.9)                      | 412         | 71 (16.7)                       | 426         | 0.77 (0.54, 1.08)                | 0.125        | 0.314               |
| NeOProM   | COT            | 57 (13.8)                      | 414         | 59 (13.8)                       | 428         | 0.96 (0.69, 1.34)                | 0.813        |                     |
| defined - | BOOST II NZ    | 3 (3.0)                        | 101         | 2 (1.9)                         | 106         | 1.58 (0.27, 9.12)                | 0.612        |                     |
| No        | BOOST II UK    | 32 (14.5)                      | 221         | 25 (10.7)                       | 234         | 1.36 (0.80, 2.31)                | 0.260        |                     |
|           | BOOST II AUS   | 34 (9.6)                       | 356         | 30 (8.2)                        | 368         | 1.13 (0.71, 1.78)                | 0.615        |                     |
|           | <b>NeOProM</b> | <b>179 (11.9)</b>              | <b>1504</b> | <b>187 (12.0)</b>               | <b>1562</b> | <b>0.97 (0.80, 1.18)</b>         | <b>0.755</b> |                     |
| Yes       | SUPPORT        | 19 (31.7)                      | 60          | 24 (30.4)                       | 79          | 0.95 (0.56, 1.60)                | 0.840        |                     |
|           | COT            | 3 (7.7)                        | 39          | 6 (18.2)                        | 33          | 0.69 (0.43, 1.11)                | 0.129        |                     |
|           | BOOST II NZ    | 4 (26.7)                       | 15          | 2 (25.0)                        | 8           | 1.00 (0.23, 4.35)                | 0.999        |                     |
|           | BOOST II UK    | 2 (8.3)                        | 24          | 4 (16.0)                        | 25          | 0.52 (0.11, 2.61)                | 0.431        |                     |
|           | BOOST II AUS   | 4 (8.0)                        | 50          | 9 (15.5)                        | 58          | 0.52 (0.17, 1.57)                | 0.244        |                     |
|           | <b>NeOProM</b> | <b>32 (17.0)</b>               | <b>188</b>  | <b>45 (22.2)</b>                | <b>203</b>  | <b>0.80 (0.53, 1.18)</b>         | <b>0.260</b> |                     |

\* Analysis adjusted for trials and multiple births

## Abbreviations/definitions

CI: confidence interval; RR: relative risk; GA: gestational age; SUPPORT: Surfactant Positive Airway Pressure and Pulse Oximetry Trial; COT: Canadian Oxygen Trial; BOOST: Benefits of Oxygen Saturation Targeting; NZ: New Zealand; UK: United Kingdom; AUS: Australia; NeOProM: Neonatal Oxygenation Prospective Meta-analysis; inborn: born inside the treating center; outborn: born outside the treating center (e.g. transferred from another hospital); vaginal: mode of delivery through the vagina; Caesarean: mode of delivery via surgical procedure; ANS: antenatal corticosteroids; singleton: child born as a single birth; multiple: more than one child per birth; start<6 hrs: intervention commenced less than 6 hours after birth; start>=6 hrs: intervention commenced greater than or equal to 6 hours after birth; original software: original oximeter software; revised software: revised oximeter software; SGA: small for gestational age; SGA NeOProM defined: small for gestational age as per definition used by NeOProM collaboration, i.e. less than 10th percentile using charts from Kramer et al.<sup>1</sup>

The subgroup analysis by oximeter software type (original vs revised) excludes n=74 infants in COT who were exposed to both the original and revised software.

Empty cells (.) indicate data not collected or not applicable in this trial.

These analyses exclude infants in SUPPORT and COT where values of Bayley-III were imputed for infants who had unsuccessful Bayley-III assessments due to severe developmental delay or autism.

\*\*\* Low / no event rate(s) makes parameter not estimable.

eTable 22. Bayley-III cognitive <70, by subgroups

|           |                | Lower Oxygen Saturation Target |             | Higher Oxygen Saturation Target |             | Adjusted* Relative Risk (95% CI) |              |                     |
|-----------|----------------|--------------------------------|-------------|---------------------------------|-------------|----------------------------------|--------------|---------------------|
| Subgroup  | Trial          | n (%)                          | N           | n (%)                           | N           | Adjusted RR                      | p-value      | interaction p-value |
| GA<26 wks | SUPPORT        | 17 (10.1)                      | 169         | 22 (11.2)                       | 196         | 0.88 (0.48, 1.63)                | 0.691        | 0.609               |
|           | COT            | 15 (8.4)                       | 178         | 22 (12.6)                       | 175         | 0.66 (0.36, 1.21)                | 0.180        |                     |
|           | BOOST NZ       | 1 (2.5)                        | 40          | 1 (2.3)                         | 44          | 1.10 (0.07, 16.4)                | 0.946        |                     |
|           | BOOST II UK    | 13 (15.1)                      | 86          | 8 (8.9)                         | 90          | 2.08 (0.69, 6.29)                | 0.195        |                     |
|           | BOOST II AUS   | 9 (6.0)                        | 151         | 9 (5.3)                         | 171         | 1.13 (0.46, 2.79)                | 0.787        |                     |
|           | <b>NeOProM</b> | <b>55 (8.8)</b>                | <b>624</b>  | <b>62 (9.2)</b>                 | <b>676</b>  | <b>0.95 (0.67, 1.35)</b>         | <b>0.789</b> |                     |
| GA≥26 wks | SUPPORT        | 17 (5.6)                       | 302         | 16 (5.2)                        | 307         | 1.02 (0.51, 2.04)                | 0.954        |                     |
|           | COT            | 9 (3.2)                        | 279         | 15 (5.2)                        | 286         | 0.08 (0.01, 0.41)                | 0.003        |                     |
|           | BOOST NZ       | 4 (5.3)                        | 76          | 0                               | 70          |                                  | ***          |                     |
|           | BOOST II UK    | 10 (6.3)                       | 159         | 6 (3.6)                         | 169         | 1.75 (0.60, 5.12)                | 0.303        |                     |
|           | BOOST II AUS   | 8 (3.1)                        | 255         | 5 (2.0)                         | 255         | 1.60 (0.54, 4.80)                | 0.399        |                     |
|           | <b>NeOProM</b> | <b>48 (4.5)</b>                | <b>1071</b> | <b>42 (3.9)</b>                 | <b>1087</b> | <b>1.10 (0.70, 1.71)</b>         | <b>0.681</b> |                     |
| Inborn    | SUPPORT        | 34 (7.2)                       | 471         | 38 (7.6)                        | 503         | 0.93 (0.59, 1.47)                | 0.756        | 0.525               |
|           | COT            | 21 (5.0)                       | 424         | 34 (8.1)                        | 421         | 0.52 (0.30, 0.91)                | 0.022        |                     |
|           | BOOST NZ       | 5 (4.5)                        | 110         | 1 (0.9)                         | 109         | 4.97 (0.59, 42.0)                | 0.141        |                     |
|           | BOOST II UK    | 20 (9.1)                       | 219         | 12 (5.2)                        | 231         | 1.90 (0.85, 4.25)                | 0.117        |                     |
|           | BOOST II AUS   | 16 (4.2)                       | 377         | 14 (3.5)                        | 405         | 1.23 (0.61, 2.49)                | 0.567        |                     |
|           | <b>NeOProM</b> | <b>96 (6.0)</b>                | <b>1601</b> | <b>99 (5.9)</b>                 | <b>1669</b> | <b>0.99 (0.75, 1.32)</b>         | <b>0.952</b> |                     |
| Outborn   | SUPPORT        | .                              | .           | .                               | .           | .                                | .            |                     |
|           | COT            | 3 (9.1)                        | 33          | 3 (7.5)                         | 40          | 1.21 (0.28, 5.23)                | 0.798        |                     |
|           | BOOST NZ       | 0                              | 6           | 0                               | 5           |                                  | ***          |                     |
|           | BOOST II UK    | 3 (11.5)                       | 26          | 2 (7.1)                         | 28          | 1.71 (0.30, 9.66)                | 0.545        |                     |
|           | BOOST II AUS   | 1 (3.4)                        | 29          | 0                               | 21          |                                  | ***          |                     |
|           | <b>NeOProM</b> | <b>7 (7.4)</b>                 | <b>94</b>   | <b>5 (5.3)</b>                  | <b>94</b>   | <b>1.54 (0.50, 4.28)</b>         | <b>0.481</b> |                     |
| Vaginal   | SUPPORT        | 9 (6.2)                        | 145         | 14 (8.1)                        | 173         | 0.67 (0.29, 1.56)                | 0.355        | 0.873               |
|           | COT            | 9 (5.4)                        | 167         | 16 (8.4)                        | 191         | 0.64 (0.29, 1.41)                | 0.268        |                     |
|           | BOOST NZ       | 2 (4.3)                        | 47          | 1 (2.0)                         | 51          | 2.16 (0.21, 22.4)                | 0.519        |                     |
|           | BOOST II UK    | 12 (8.3)                       | 145         | 7 (4.8)                         | 147         | 1.78 (0.72, 4.41)                | 0.211        |                     |
|           | BOOST II AUS   | 7 (3.7)                        | 191         | 4 (2.1)                         | 191         | 1.80 (0.54, 5.99)                | 0.338        |                     |
|           | <b>NeOProM</b> | <b>39 (5.6)</b>                | <b>695</b>  | <b>42 (5.6)</b>                 | <b>753</b>  | <b>1.00 (0.65, 1.52)</b>         | <b>0.986</b> |                     |
| Caesarean | SUPPORT        | 25 (7.7)                       | 326         | 24 (7.3)                        | 330         | 1.05 (0.60, 1.84)                | 0.856        |                     |
|           | COT            | 15 (5.2)                       | 290         | 21 (7.8)                        | 269         | 0.56 (0.28, 1.12)                | 0.101        |                     |
|           | BOOST NZ       | 3 (4.3)                        | 69          | 0                               | 63          |                                  | ***          |                     |
|           | BOOST II UK    | 11 (11.0)                      | 100         | 7 (6.3)                         | 112         | 2.03 (0.73, 5.70)                | 0.177        |                     |
|           | BOOST II AUS   | 9 (4.2)                        | 214         | 10 (4.3)                        | 233         | 0.97 (0.40, 2.36)                | 0.953        |                     |
|           | <b>NeOProM</b> | <b>63 (6.3)</b>                | <b>999</b>  | <b>62 (6.2)</b>                 | <b>1007</b> | <b>1.03 (0.72, 1.47)</b>         | <b>0.858</b> |                     |
| ANS - No  | SUPPORT        | 2 (11.8)                       | 17          | 0                               | 24          |                                  | ***          | 0.593               |
|           | COT            | 5 (10.9)                       | 46          | 8 (19.5)                        | 41          | 0.55 (0.21, 1.47)                | 0.233        |                     |
|           | BOOST NZ       | 0                              | 13          | 0                               | 10          |                                  | ***          |                     |

eTable 22. Bayley-III cognitive <70, by subgroups (continued)

|             |                | Lower Oxygen Saturation Target |             | Higher Oxygen Saturation Target |             | Adjusted* Relative Risk (95% CI) |              |                     |
|-------------|----------------|--------------------------------|-------------|---------------------------------|-------------|----------------------------------|--------------|---------------------|
| Subgroup    | Trial          | n (%)                          | N           | n (%)                           | N           | Adjusted RR                      | p-value      | interaction p-value |
|             | BOOST II UK    | 1 (6.3)                        | 16          | 1 (5.6)                         | 18          | 1.13 (0.08, 16.3)                | 0.927        |                     |
|             | BOOST II AUS   | 2 (4.9)                        | 41          | 2 (7.4)                         | 27          | 0.53 (0.10, 2.79)                | 0.454        |                     |
|             | <b>NeOProM</b> | <b>10 (7.5)</b>                | <b>133</b>  | <b>11 (9.2)</b>                 | <b>120</b>  | <b>0.79 (0.39, 1.81)</b>         | <b>0.661</b> |                     |
| ANS - Yes   | SUPPORT        | 32 (7.0)                       | 454         | 38 (7.9)                        | 479         | 0.88 (0.55, 1.41)                | 0.600        |                     |
|             | COT            | 19 (4.6)                       | 410         | 29 (6.9)                        | 420         | 0.52 (0.29, 0.93)                | 0.028        |                     |
|             | BOOST NZ       | 5 (4.9)                        | 103         | 1 (1.0)                         | 104         | 5.06 (0.60, 42.8)                | 0.136        |                     |
|             | BOOST II UK    | 22 (9.6)                       | 228         | 13 (5.4)                        | 239         | 1.85 (0.88, 3.89)                | 0.103        |                     |
|             | BOOST II AUS   | 15 (4.1)                       | 363         | 12 (3.0)                        | 395         | 1.36 (0.65, 2.88)                | 0.415        |                     |
|             | <b>NeOProM</b> | <b>93 (6.0)</b>                | <b>1558</b> | <b>93 (5.7)</b>                 | <b>1637</b> | <b>1.03 (0.77, 1.37)</b>         | <b>0.849</b> |                     |
| Male        | SUPPORT        | 18 (7.6)                       | 236         | 25 (9.0)                        | 278         | 0.84 (0.47, 1.52)                | 0.568        | 0.456               |
|             | COT            | 16 (6.3)                       | 252         | 27 (11.4)                       | 237         | 0.44 (0.21, 0.90)                | 0.025        |                     |
|             | BOOST NZ       | 3 (5.2)                        | 58          | 1 (1.7)                         | 59          | 3.04 (0.32, 28.6)                | 0.330        |                     |
|             | BOOST II UK    | 13 (10.6)                      | 123         | 9 (6.9)                         | 131         | 1.63 (0.70, 3.81)                | 0.261        |                     |
|             | BOOST II AUS   | 14 (7.0)                       | 201         | 8 (3.8)                         | 212         | 1.85 (0.79, 4.33)                | 0.154        |                     |
|             | <b>NeOProM</b> | <b>64 (7.4)</b>                | <b>870</b>  | <b>70 (7.6)</b>                 | <b>917</b>  | <b>0.94 (0.67, 1.32)</b>         | <b>0.729</b> |                     |
| Female      | SUPPORT        | 16 (6.8)                       | 235         | 13 (5.8)                        | 225         | 1.11 (0.52, 2.35)                | 0.786        |                     |
|             | COT            | 8 (3.9)                        | 205         | 10 (4.5)                        | 224         | 0.87 (0.35, 2.17)                | 0.769        |                     |
|             | BOOST NZ       | 2 (3.4)                        | 58          | 0                               | 55          |                                  | ***          |                     |
|             | BOOST II UK    | 10 (8.2)                       | 122         | 5 (3.9)                         | 128         | 2.11 (0.75, 5.95)                | 0.158        |                     |
|             | BOOST II AUS   | 3 (1.5)                        | 205         | 6 (2.8)                         | 214         | 0.52 (0.13, 2.06)                | 0.354        |                     |
|             | <b>NeOProM</b> | <b>39 (4.7)</b>                | <b>825</b>  | <b>34 (4.0)</b>                 | <b>846</b>  | <b>1.13 (0.71, 1.79)</b>         | <b>0.615</b> |                     |
| Singleton   | SUPPORT        | 25 (7.1)                       | 350         | 31 (8.2)                        | 377         | 0.87 (0.52, 1.44)                | 0.586        | 0.432               |
|             | COT            | 14 (4.5)                       | 311         | 23 (7.1)                        | 322         | 0.63 (0.33, 1.20)                | 0.161        |                     |
|             | BOOST NZ       | 4 (4.7)                        | 85          | 1 (1.1)                         | 87          | 4.09 (0.47, 35.9)                | 0.203        |                     |
|             | BOOST II UK    | 10 (6.1)                       | 164         | 7 (3.8)                         | 183         | 1.59 (0.62, 4.09)                | 0.332        |                     |
|             | BOOST II AUS   | 12 (3.9)                       | 305         | 11 (3.4)                        | 326         | 1.17 (0.52, 2.60)                | 0.708        |                     |
|             | <b>NeOProM</b> | <b>65 (5.3)</b>                | <b>1215</b> | <b>73 (5.6)</b>                 | <b>1295</b> | <b>0.95 (0.68, 1.31)</b>         | <b>0.741</b> |                     |
| Multiple    | SUPPORT        | 9 (7.4)                        | 121         | 7 (5.6)                         | 126         | 1.34 (0.44, 4.11)                | 0.604        |                     |
|             | COT            | 10 (6.8)                       | 146         | 14 (10.1)                       | 139         | 0.56 (0.26, 1.17)                | 0.120        |                     |
|             | BOOST NZ       | 1 (3.2)                        | 31          | 0                               | 27          |                                  | ***          |                     |
|             | BOOST II UK    | 13 (16.0)                      | 81          | 7 (9.2)                         | 76          | 1.76 (0.71, 4.39)                | 0.224        |                     |
|             | BOOST II AUS   | 5 (5.0)                        | 101         | 3 (3.0)                         | 100         | 1.66 (0.40, 6.87)                | 0.483        |                     |
|             | <b>NeOProM</b> | <b>38 (7.9)</b>                | <b>480</b>  | <b>31 (6.6)</b>                 | <b>468</b>  | <b>1.13 (0.71, 1.81)</b>         | <b>0.608</b> |                     |
| start<6 hrs | SUPPORT        | 33 (7.2)                       | 460         | 37 (7.5)                        | 493         | 0.93 (0.58, 1.48)                | 0.751        | 0.672               |
|             | COT            | 1 (4.8)                        | 21          | 2 (10.0)                        | 20          | 0.48 (0.05, 4.81)                | 0.532        |                     |
|             | BOOST NZ       | 4 (18.2)                       | 22          | 0                               | 21          |                                  | ***          |                     |
|             | BOOST II UK    |                                | .           |                                 | .           |                                  | .            |                     |
|             | BOOST II AUS   | 2 (5.1)                        | 39          | 5 (10.2)                        | 49          | 0.54 (0.12, 2.43)                | 0.425        |                     |
|             | <b>NeOProM</b> | <b>40 (7.4)</b>                | <b>542</b>  | <b>44 (7.5)</b>                 | <b>583</b>  | <b>0.94 (0.61, 1.47)</b>         | <b>0.791</b> |                     |
| >=6 hrs     | SUPPORT        | 0                              | 5           | 0                               | 4           |                                  | ***          |                     |

eTable 22. Bayley-III cognitive <70, by subgroups (continued)

|                            |                | Lower Oxygen Saturation Target |             | Higher Oxygen Saturation Target |             | Adjusted* Relative Risk (95% CI) |              |                     |
|----------------------------|----------------|--------------------------------|-------------|---------------------------------|-------------|----------------------------------|--------------|---------------------|
| Subgroup                   | Trial          | n (%)                          | N           | n (%)                           | N           | Adjusted RR                      | p-value      | interaction p-value |
|                            | COT            | 23 (5.3)                       | 436         | 35 (7.9)                        | 441         | 0.57 (0.34, 0.97)                | 0.040        |                     |
|                            | BOOST NZ       | 1 (1.1)                        | 94          | 1 (1.1)                         | 93          | 0.99 (0.06, 15.5)                | 0.994        |                     |
|                            | BOOST II UK    |                                | .           |                                 | .           |                                  | .            |                     |
|                            | BOOST II AUS   | 15 (4.1)                       | 366         | 9 (2.4)                         | 377         | 1.71 (0.76, 3.87)                | 0.195        |                     |
|                            | <b>NeOProM</b> | <b>39 (4.3)</b>                | <b>901</b>  | <b>45 (4.9)</b>                 | <b>915</b>  | <b>0.87 (0.58, 1.34)</b>         | <b>0.554</b> |                     |
| Original software          | SUPPORT        | 34 (7.2)                       | 471         | 38 (7.6)                        | 503         | 0.93 (0.59, 1.47)                | 0.756        | 0.567               |
|                            | COT            | 9 (4.2)                        | 213         | 15 (7.1)                        | 211         | 0.61 (0.28, 1.33)                | 0.215        |                     |
|                            | BOOST NZ       | 5 (4.3)                        | 116         | 1 (0.9)                         | 114         | 4.92 (0.58, 41.7)                | 0.143        |                     |
|                            | BOOST II UK    | 6 (11.1)                       | 54          | 4 (6.9)                         | 58          | 14.7 (0.35, 625)                 | 0.160        |                     |
|                            | BOOST II AUS   | 9 (3.6)                        | 252         | 8 (3.0)                         | 263         | 1.19 (0.47, 3.00)                | 0.715        |                     |
|                            | <b>NeOProM</b> | <b>63 (5.7)</b>                | <b>1106</b> | <b>66 (5.7)</b>                 | <b>1149</b> | <b>1.00 (0.70, 1.42)</b>         | <b>0.995</b> |                     |
| Revised software           | SUPPORT        |                                | .           |                                 | .           |                                  | .            |                     |
|                            | COT            | 15 (6.9)                       | 217         | 17 (8.0)                        | 213         | 0.63 (0.30, 1.29)                | 0.205        |                     |
|                            | BOOST NZ       |                                | .           |                                 | .           |                                  | .            |                     |
|                            | BOOST II UK    | 17 (8.9)                       | 191         | 10 (5.0)                        | 201         | 1.81 (0.85, 3.84)                | 0.123        |                     |
|                            | BOOST II AUS   | 8 (5.2)                        | 154         | 6 (3.7)                         | 163         | 1.42 (0.50, 3.98)                | 0.510        |                     |
|                            | <b>NeOProM</b> | <b>40 (7.1)</b>                | <b>562</b>  | <b>33 (5.7)</b>                 | <b>577</b>  | <b>1.22 (0.77, 1.92)</b>         | <b>0.401</b> |                     |
| SGA: Trialist defined - No | SUPPORT        | 29 (6.4)                       | 455         | 31 (6.7)                        | 465         | 0.92 (0.55, 1.54)                | 0.757        | 0.237               |
|                            | COT            | 24 (5.7)                       | 418         | 34 (7.9)                        | 428         | 0.63 (0.37, 1.06)                | 0.079        |                     |
|                            | BOOST II NZ    | 3 (3.0)                        | 101         | 1 (0.9)                         | 106         | 3.14 (0.34, 29.3)                | 0.314        |                     |
|                            | BOOST II UK    | 21 (10.0)                      | 211         | 11 (5.0)                        | 222         | 2.03 (0.92, 4.44)                | 0.078        |                     |
|                            | BOOST II AUS   | 15 (4.2)                       | 356         | 8 (2.2)                         | 368         | 1.95 (0.84, 4.51)                | 0.121        |                     |
|                            | <b>NeOProM</b> | <b>92 (6.0)</b>                | <b>1541</b> | <b>85 (5.3)</b>                 | <b>1589</b> | <b>1.07 (0.79, 1.44)</b>         | <b>0.655</b> |                     |
| Yes                        | SUPPORT        | 5 (31.3)                       | 16          | 7 (18.4)                        | 38          | 1.68 (0.63, 4.52)                | 0.304        |                     |
|                            | COT            | 0                              | 39          | 3 (9.1)                         | 33          |                                  | ***          |                     |
|                            | BOOST II NZ    | 2 (13.3)                       | 15          | 0                               | 8           |                                  | ***          |                     |
|                            | BOOST II UK    | 2 (6.1)                        | 33          | 3 (8.1)                         | 37          | 0.75 (0.13, 4.22)                | 0.744        |                     |
|                            | BOOST II AUS   | 2 (4.0)                        | 50          | 6 (10.3)                        | 58          | 0.39 (0.08, 1.83)                | 0.231        |                     |
|                            | <b>NeOProM</b> | <b>11 (7.2)</b>                | <b>153</b>  | <b>19 (10.9)</b>                | <b>174</b>  | <b>0.84 (0.40, 1.74)</b>         | <b>0.640</b> |                     |
| SGA: NeOProM defined - No  | SUPPORT        | 24 (5.8)                       | 411         | 28 (6.6)                        | 424         | 0.85 (0.49, 1.48)                | 0.572        | 0.574               |
|                            | COT            | 24 (5.7)                       | 418         | 34 (7.9)                        | 428         | 0.63 (0.37, 1.06)                | 0.079        |                     |
|                            | BOOST II NZ    | 3 (3.0)                        | 101         | 1 (0.9)                         | 106         | 3.14 (0.34, 29.3)                | 0.314        |                     |
|                            | BOOST II UK    | 21 (9.5)                       | 221         | 12 (5.1)                        | 234         | 1.85 (0.87, 3.90)                | 0.108        |                     |
|                            | BOOST II AUS   | 15 (4.2)                       | 356         | 8 (2.2)                         | 368         | 1.95 (0.84, 4.51)                | 0.121        |                     |
|                            | <b>NeOProM</b> | <b>87 (5.8)</b>                | <b>1507</b> | <b>83 (5.3)</b>                 | <b>1560</b> | <b>1.04 (0.76, 1.41)</b>         | <b>0.813</b> |                     |
| Yes                        | SUPPORT        | 10 (16.7)                      | 60          | 10 (12.7)                       | 79          | 1.31 (0.58, 2.96)                | 0.509        |                     |
|                            | COT            | 0                              | 39          | 3 (9.1)                         | 33          |                                  | ***          |                     |
|                            | BOOST II NZ    | 2 (13.3)                       | 15          | 0                               | 8           |                                  | ***          |                     |
|                            | BOOST II UK    | 2 (8.3)                        | 24          | 2 (8.0)                         | 25          | 1.05 (0.16, 6.88)                | 0.960        |                     |
|                            | BOOST II AUS   | 2 (4.0)                        | 50          | 6 (10.3)                        | 58          | 0.39 (0.08, 1.83)                | 0.231        |                     |
|                            | <b>NeOProM</b> | <b>16 (8.5)</b>                | <b>188</b>  | <b>21 (10.3)</b>                | <b>203</b>  | <b>0.89 (0.48, 1.65)</b>         | <b>0.718</b> |                     |

\* Analysis adjusted for trials and multiple births

### **Abbreviations/definitions**

CI: confidence interval; RR: relative risk; GA: gestational age; SUPPORT: Surfactant Positive Airway Pressure and Pulse Oximetry Trial; COT: Canadian Oxygen Trial; BOOST: Benefits of Oxygen Saturation Targeting; NZ: New Zealand; UK: United Kingdom; AUS: Australia; NeOProM: Neonatal Oxygenation Prospective Meta-analysis; inborn: born inside the treating center; outborn: born outside the treating center (e.g. transferred from another hospital); vaginal: mode of delivery through the vagina; Caesarean: mode of delivery via surgical procedure; ANS: antenatal corticosteroids; singleton: child born as a single birth; multiple: more than one child per birth; start<6 hrs: intervention commenced less than 6 hours after birth; start>=6 hrs: intervention commenced greater than or equal to 6 hours after birth; original software: original oximeter software; revised software: revised oximeter software; SGA: small for gestational age; SGA NeOProM defined: small for gestational age as per definition used by NeOProM collaboration, i.e. less than 10th percentile using charts from Kramer et al.<sup>1</sup>

The subgroup analysis by oximeter software type (original vs revised) excludes n=74 infants in COT who were exposed to both the original and revised software.

Empty cells (.) indicate data not collected or not applicable in this trial.

These analyses exclude infants in SUPPORT and COT where values of Bayley-III were imputed for infants who had unsuccessful Bayley-III assessments due to severe developmental delay or autism.

\*\*\* Low / no event rate(s) makes parameter not estimable.

eTable 23. Bayley-III language <70, by subgroups

|           |                | Lower Oxygen Saturation Target |             | Higher Oxygen Saturation Target |             | Adjusted* Relative Risk (95% CI) |              |                     |
|-----------|----------------|--------------------------------|-------------|---------------------------------|-------------|----------------------------------|--------------|---------------------|
| Subgroup  | Trial          | n (%)                          | N           | n (%)                           | N           | Adjusted RR                      | p-value      | interaction p-value |
| GA<26 wks | SUPPORT        | 33 (19.6)                      | 168         | 48 (24.9)                       | 193         | 0.75 (0.50, 1.13)                | 0.163        | 0.297               |
|           | COT            | 27 (15.3)                      | 176         | 28 (16.5)                       | 170         | 0.92 (0.58, 1.47)                | 0.729        |                     |
|           | BOOST NZ       | 1 (2.5)                        | 40          | 1 (2.5)                         | 40          | 1.00 (0.07, 14.8)                | 0.999        |                     |
|           | BOOST II UK    | 14 (16.7)                      | 84          | 13 (14.9)                       | 87          | 1.34 (0.54, 3.31)                | 0.523        |                     |
|           | BOOST II AUS   | 17 (11.6)                      | 146         | 17 (10.2)                       | 167         | 1.10 (0.61, 1.96)                | 0.755        |                     |
|           | <b>NeOProM</b> | <b>92 (15.0)</b>               | <b>614</b>  | <b>107 (16.3)</b>               | <b>657</b>  | <b>0.91 (0.70, 1.17)</b>         | <b>0.452</b> |                     |
| GA≥26 wks | SUPPORT        | 36 (12.2)                      | 294         | 37 (12.1)                       | 305         | 1.00 (0.64, 1.56)                | 0.993        |                     |
|           | COT            | 30 (11.0)                      | 273         | 29 (10.2)                       | 284         | 1.02 (0.63, 1.66)                | 0.928        |                     |
|           | BOOST NZ       | 6 (8.6)                        | 70          | 2 (3.0)                         | 66          | 2.93 (0.68, 12.7)                | 0.151        |                     |
|           | BOOST II UK    | 18 (11.5)                      | 156         | 13 (8.1)                        | 160         | 1.42 (0.69, 2.92)                | 0.337        |                     |
|           | BOOST II AUS   | 18 (7.3)                       | 247         | 18 (7.3)                        | 247         | 1.08 (0.57, 2.05)                | 0.803        |                     |
|           | <b>NeOProM</b> | <b>108 (10.4)</b>              | <b>1040</b> | <b>99 (9.3)</b>                 | <b>1062</b> | <b>1.11 (0.85, 1.44)</b>         | <b>0.464</b> |                     |
| Inborn    | SUPPORT        | 69 (14.9)                      | 462         | 85 (17.1)                       | 498         | 0.85 (0.63, 1.15)                | 0.299        | 0.848               |
|           | COT            | 51 (12.2)                      | 417         | 50 (12.1)                       | 414         | 0.98 (0.68, 1.41)                | 0.917        |                     |
|           | BOOST NZ       | 7 (6.7)                        | 104         | 3 (3.0)                         | 101         | 2.33 (0.63, 8.65)                | 0.207        |                     |
|           | BOOST II UK    | 29 (13.6)                      | 214         | 23 (10.5)                       | 220         | 1.36 (0.76, 2.44)                | 0.301        |                     |
|           | BOOST II AUS   | 34 (9.3)                       | 364         | 34 (8.7)                        | 393         | 1.09 (0.71, 1.69)                | 0.691        |                     |
|           | <b>NeOProM</b> | <b>190 (12.2)</b>              | <b>1561</b> | <b>195 (12.0)</b>               | <b>1626</b> | <b>1.00 (0.83, 1.22)</b>         | <b>0.966</b> |                     |
| Outborn   | SUPPORT        | .                              | .           | .                               | .           | .                                | .            |                     |
|           | COT            | 6 (18.8)                       | 32          | 7 (17.5)                        | 40          | 1.07 (0.48, 2.37)                | 0.868        |                     |
|           | BOOST NZ       | 0                              | 6           | 0                               | 5           |                                  | ***          |                     |
|           | BOOST II UK    | 3 (11.5)                       | 26          | 3 (11.1)                        | 27          | 1.07 (0.24, 4.82)                | 0.927        |                     |
|           | BOOST II AUS   | 1 (3.4)                        | 29          | 1 (4.8)                         | 21          | 0.72 (0.05, 10.1)                | 0.810        |                     |
|           | <b>NeOProM</b> | <b>10 (10.8)</b>               | <b>93</b>   | <b>11 (11.8)</b>                | <b>93</b>   | <b>1.03 (0.46, 2.25)</b>         | <b>0.951</b> |                     |
| Vaginal   | SUPPORT        | 19 (13.2)                      | 144         | 25 (14.7)                       | 170         | 0.78 (0.44, 1.39)                | 0.396        | 0.678               |
|           | COT            | 23 (13.9)                      | 165         | 24 (12.8)                       | 187         | 1.08 (0.64, 1.84)                | 0.765        |                     |
|           | BOOST NZ       | 2 (4.4)                        | 45          | 0                               | 49          |                                  | ***          |                     |
|           | BOOST II UK    | 17 (11.9)                      | 143         | 14 (10.1)                       | 139         | 1.18 (0.58, 2.39)                | 0.643        |                     |
|           | BOOST II AUS   | 17 (9.4)                       | 181         | 16 (8.7)                        | 184         | 1.08 (0.56, 2.07)                | 0.819        |                     |
|           | <b>NeOProM</b> | <b>78 (11.5)</b>               | <b>678</b>  | <b>79 (10.8)</b>                | <b>729</b>  | <b>1.05 (0.78, 1.41)</b>         | <b>0.757</b> |                     |
| Caesarean | SUPPORT        | 50 (15.7)                      | 318         | 60 (18.3)                       | 328         | 0.85 (0.60, 1.22)                | 0.385        |                     |
|           | COT            | 34 (12.0)                      | 284         | 33 (12.4)                       | 266         | 0.93 (0.59, 1.46)                | 0.760        |                     |
|           | BOOST NZ       | 5 (7.7)                        | 65          | 3 (5.3)                         | 57          | 1.51 (0.40, 5.70)                | 0.545        |                     |
|           | BOOST II UK    | 15 (15.5)                      | 97          | 12 (11.1)                       | 108         | 1.44 (0.68, 3.05)                | 0.337        |                     |
|           | BOOST II AUS   | 17 (8.1)                       | 211         | 18 (7.9)                        | 228         | 1.10 (0.61, 1.96)                | 0.756        |                     |
|           | <b>NeOProM</b> | <b>121 (12.4)</b>              | <b>975</b>  | <b>126 (12.8)</b>               | <b>987</b>  | <b>0.97 (0.76, 1.22)</b>         | <b>0.777</b> |                     |
| ANS - No  | SUPPORT        | 3 (17.6)                       | 17          | 5 (20.8)                        | 24          | 0.93 (0.24, 3.59)                | 0.912        | 0.234               |
|           | COT            | 9 (19.6)                       | 46          | 13 (32.5)                       | 40          | 0.59 (0.28, 1.25)                | 0.170        |                     |
|           | BOOST NZ       | 0                              | 13          | 0                               | 10          |                                  | ***          |                     |
|           | BOOST II UK    | 1 (6.3)                        | 16          | 1 (6.3)                         | 16          | 1.01 (0.07, 14.4)                | 0.996        |                     |

eTable 23. Bayley-III language <70, by subgroups (continued)

|             |                | Lower Oxygen Saturation Target |             | Higher Oxygen Saturation Target |             | Adjusted* Relative Risk (95% CI) |              |                     |
|-------------|----------------|--------------------------------|-------------|---------------------------------|-------------|----------------------------------|--------------|---------------------|
| Subgroup    | Trial          | n (%)                          | N           | n (%)                           | N           | Adjusted RR                      | p-value      | interaction p-value |
|             | BOOST II AUS   | 3 (7.7)                        | 39          | 3 (11.1)                        | 27          | 0.62 (0.14, 2.71)                | 0.521        |                     |
|             | <b>NeOProM</b> | <b>16 (12.2)</b>               | <b>131</b>  | <b>22 (18.8)</b>                | <b>117</b>  | <b>0.67 (0.38, 1.21)</b>         | <b>0.193</b> |                     |
| ANS - Yes   | SUPPORT        | 66 (14.8)                      | 445         | 80 (16.9)                       | 474         | 0.86 (0.63, 1.17)                | 0.346        |                     |
|             | COT            | 48 (11.9)                      | 402         | 44 (10.6)                       | 414         | 1.08 (0.74, 1.57)                | 0.692        |                     |
|             | BOOST NZ       | 7 (7.2)                        | 97          | 3 (3.1)                         | 96          | 2.38 (0.64, 8.76)                | 0.194        |                     |
|             | BOOST II UK    | 31 (13.9)                      | 223         | 24 (10.5)                       | 229         | 1.37 (0.78, 2.38)                | 0.271        |                     |
|             | BOOST II AUS   | 32 (9.1)                       | 352         | 32 (8.4)                        | 383         | 1.08 (0.69, 1.67)                | 0.743        |                     |
|             | <b>NeOProM</b> | <b>184 (12.1)</b>              | <b>1519</b> | <b>183 (11.5)</b>               | <b>1596</b> | <b>1.04 (0.86, 1.26)</b>         | <b>0.683</b> |                     |
| Male        | SUPPORT        | 41 (17.8)                      | 230         | 57 (20.8)                       | 274         | 0.85 (0.59, 1.23)                | 0.386        | 0.901               |
|             | COT            | 41 (16.6)                      | 247         | 39 (16.8)                       | 232         | 0.97 (0.65, 1.45)                | 0.879        |                     |
|             | BOOST NZ       | 3 (5.7)                        | 53          | 3 (5.3)                         | 57          | 1.07 (0.24, 4.75)                | 0.928        |                     |
|             | BOOST II UK    | 19 (15.7)                      | 121         | 15 (12.2)                       | 123         | 1.28 (0.67, 2.45)                | 0.448        |                     |
|             | BOOST II AUS   | 27 (13.8)                      | 195         | 20 (9.7)                        | 207         | 1.31 (0.72, 2.38)                | 0.382        |                     |
|             | <b>NeOProM</b> | <b>131 (15.5)</b>              | <b>846</b>  | <b>134 (15.0)</b>               | <b>893</b>  | <b>1.02 (0.81, 1.27)</b>         | <b>0.888</b> |                     |
| Female      | SUPPORT        | 28 (12.1)                      | 232         | 28 (12.5)                       | 224         | 0.91 (0.54, 1.52)                | 0.720        |                     |
|             | COT            | 16 (7.9)                       | 202         | 18 (8.1)                        | 222         | 0.98 (0.53, 1.82)                | 0.958        |                     |
|             | BOOST NZ       | 4 (7.0)                        | 57          | 0                               | 49          |                                  | ***          |                     |
|             | BOOST II UK    | 13 (10.9)                      | 119         | 11 (8.9)                        | 124         | 1.33 (0.48, 3.69)                | 0.586        |                     |
|             | BOOST II AUS   | 8 (4.0)                        | 198         | 15 (7.2)                        | 207         | 0.56 (0.24, 1.28)                | 0.167        |                     |
|             | <b>NeOProM</b> | <b>69 (8.5)</b>                | <b>808</b>  | <b>72 (8.7)</b>                 | <b>826</b>  | <b>0.97 (0.71, 1.34)</b>         | <b>0.865</b> |                     |
| Singleton   | SUPPORT        | 50 (14.4)                      | 347         | 66 (17.7)                       | 373         | 0.81 (0.58, 1.14)                | 0.232        | 0.487               |
|             | COT            | 41 (13.4)                      | 306         | 33 (10.5)                       | 315         | 1.28 (0.83, 1.97)                | 0.263        |                     |
|             | BOOST NZ       | 5 (6.0)                        | 83          | 2 (2.4)                         | 82          | 2.47 (0.49, 12.4)                | 0.271        |                     |
|             | BOOST II UK    | 15 (9.1)                       | 164         | 15 (8.5)                        | 176         | 1.07 (0.54, 2.13)                | 0.839        |                     |
|             | BOOST II AUS   | 28 (9.6)                       | 293         | 24 (7.6)                        | 315         | 1.25 (0.74, 2.11)                | 0.395        |                     |
|             | <b>NeOProM</b> | <b>139 (11.7)</b>              | <b>1193</b> | <b>140 (11.1)</b>               | <b>1261</b> | <b>1.04 (0.84, 1.30)</b>         | <b>0.699</b> |                     |
| Multiple    | SUPPORT        | 19 (16.5)                      | 115         | 19 (15.2)                       | 125         | 1.04 (0.53, 2.04)                | 0.912        |                     |
|             | COT            | 16 (11.2)                      | 143         | 24 (17.3)                       | 139         | 0.63 (0.37, 1.07)                | 0.089        |                     |
|             | BOOST NZ       | 2 (7.4)                        | 27          | 1 (4.2)                         | 24          | 1.92 (0.18, 19.9)                | 0.586        |                     |
|             | BOOST II UK    | 17 (22.4)                      | 76          | 11 (15.5)                       | 71          | 1.46 (0.70, 3.02)                | 0.311        |                     |
|             | BOOST II AUS   | 7 (7.0)                        | 100         | 11 (11.1)                       | 99          | 0.73 (0.34, 1.54)                | 0.405        |                     |
|             | <b>NeOProM</b> | <b>61 (13.2)</b>               | <b>461</b>  | <b>66 (14.4)</b>                | <b>458</b>  | <b>0.91 (0.66, 1.25)</b>         | <b>0.554</b> |                     |
| start<6 hrs | SUPPORT        | 67 (14.8)                      | 452         | 83 (17.0)                       | 488         | 0.85 (0.62, 1.15)                | 0.285        | 0.449               |
|             | COT            | 3 (14.3)                       | 21          | 4 (20.0)                        | 20          | 0.73 (0.19, 2.77)                | 0.641        |                     |
|             | BOOST NZ       | 5 (25.0)                       | 20          | 1 (5.6)                         | 18          | 4.14 (1.02, 16.9)                | 0.047        |                     |
|             | BOOST II UK    |                                | .           |                                 | .           |                                  | .            |                     |
|             | BOOST II AUS   | 3 (8.1)                        | 37          | 5 (10.4)                        | 48          | 0.79 (0.20, 3.11)                | 0.732        |                     |
|             | <b>NeOProM</b> | <b>78 (14.7)</b>               | <b>530</b>  | <b>93 (16.2)</b>                | <b>574</b>  | <b>0.88 (0.66, 1.18)</b>         | <b>0.403</b> |                     |
| >=6 hrs     | SUPPORT        | 1 (25.0)                       | 4           | 0                               | 4           |                                  | ***          |                     |
|             | COT            | 54 (12.6)                      | 428         | 53 (12.2)                       | 434         | 1.00 (0.71, 1.42)                | 0.998        |                     |
|             | BOOST NZ       | 2 (2.2)                        | 90          | 2 (2.3)                         | 88          | 1.00 (0.14, 6.86)                | 0.997        |                     |



eTable 23. Bayley-III language <70, by subgroups (continued)

|                            |                | Lower Oxygen Saturation Target |             | Higher Oxygen Saturation Target |             | Adjusted* Relative Risk (95% CI) |              |                     |
|----------------------------|----------------|--------------------------------|-------------|---------------------------------|-------------|----------------------------------|--------------|---------------------|
| Subgroup                   | Trial          | n (%)                          | N           | n (%)                           | N           | Adjusted RR                      | p-value      | interaction p-value |
|                            | BOOST II UK    |                                | .           |                                 | .           |                                  | .            |                     |
|                            | BOOST II AUS   | 32 (9.0)                       | 355         | 30 (8.2)                        | 366         | 1.14 (0.73, 1.79)                | 0.560        |                     |
|                            | <b>NeOProM</b> | <b>89 (10.1)</b>               | <b>877</b>  | <b>85 (9.5)</b>                 | <b>892</b>  | <b>1.04 (0.79, 1.37)</b>         | <b>0.773</b> |                     |
| Original software          | SUPPORT        | 69 (14.9)                      | 462         | 85 (17.1)                       | 498         | 0.85 (0.63, 1.15)                | 0.299        | 0.713               |
|                            | COT            | 29 (13.8)                      | 210         | 29 (13.9)                       | 209         | 1.01 (0.64, 1.57)                | 0.977        |                     |
|                            | BOOST NZ       | 7 (6.4)                        | 110         | 3 (2.8)                         | 106         | 2.31 (0.62, 8.57)                | 0.211        |                     |
|                            | BOOST II UK    | 7 (13.0)                       | 54          | 6 (11.3)                        | 53          | 9.87 (0.46, 213)                 | 0.144        |                     |
|                            | BOOST II AUS   | 22 (9.2)                       | 240         | 18 (7.0)                        | 256         | 1.31 (0.74, 2.34)                | 0.354        |                     |
|                            | <b>NeOProM</b> | <b>134 (12.5)</b>              | <b>1076</b> | <b>141 (12.6)</b>               | <b>1122</b> | <b>1.00 (0.80, 1.24)</b>         | <b>0.969</b> |                     |
| Revised software           | SUPPORT        |                                | .           |                                 | .           |                                  | .            |                     |
|                            | COT            | 26 (12.3)                      | 212         | 22 (10.5)                       | 209         | 1.08 (0.63, 1.85)                | 0.788        |                     |
|                            | BOOST NZ       |                                | .           |                                 | .           |                                  | .            |                     |
|                            | BOOST II UK    | 25 (13.4)                      | 186         | 20 (10.3)                       | 194         | 1.30 (0.76, 2.24)                | 0.339        |                     |
|                            | BOOST II AUS   | 13 (8.5)                       | 153         | 17 (10.8)                       | 158         | 0.81 (0.42, 1.55)                | 0.521        |                     |
|                            | <b>NeOProM</b> | <b>64 (11.6)</b>               | <b>551</b>  | <b>59 (10.5)</b>                | <b>561</b>  | <b>1.09 (0.78, 1.53)</b>         | <b>0.617</b> |                     |
| SGA: Trialist defined - No | SUPPORT        | 63 (14.1)                      | 446         | 69 (15.0)                       | 461         | 0.91 (0.66, 1.27)                | 0.585        | 0.025               |
|                            | COT            | 54 (13.1)                      | 411         | 52 (12.3)                       | 422         | 1.04 (0.74, 1.47)                | 0.812        |                     |
|                            | BOOST II NZ    | 3 (3.2)                        | 95          | 1 (1.0)                         | 98          | 3.09 (0.33, 28.7)                | 0.322        |                     |
|                            | BOOST II UK    | 30 (14.4)                      | 208         | 20 (9.5)                        | 210         | 1.51 (0.83, 2.74)                | 0.178        |                     |
|                            | BOOST II AUS   | 32 (9.3)                       | 344         | 27 (7.5)                        | 358         | 1.20 (0.75, 1.93)                | 0.446        |                     |
|                            | <b>NeOProM</b> | <b>182 (12.1)</b>              | <b>1504</b> | <b>169 (10.9)</b>               | <b>1549</b> | <b>1.08 (0.89, 1.31)</b>         | <b>0.448</b> |                     |
| Yes                        | SUPPORT        | 6 (37.5)                       | 16          | 16 (43.2)                       | 37          | 0.85 (0.41, 1.76)                | 0.656        |                     |
|                            | COT            | 3 (7.9)                        | 38          | 5 (15.6)                        | 32          | 0.73 (0.45, 1.19)                | 0.207        |                     |
|                            | BOOST II NZ    | 4 (26.7)                       | 15          | 2 (25.0)                        | 8           | 1.00 (0.23, 4.35)                | 0.999        |                     |
|                            | BOOST II UK    | 2 (6.5)                        | 31          | 6 (16.2)                        | 37          | 0.40 (0.09, 1.83)                | 0.237        |                     |
|                            | BOOST II AUS   | 3 (6.1)                        | 49          | 8 (14.3)                        | 56          | 0.43 (0.12, 1.53)                | 0.191        |                     |
|                            | <b>NeOProM</b> | <b>18 (12.1)</b>               | <b>149</b>  | <b>37 (21.8)</b>                | <b>170</b>  | <b>0.66 (0.40, 1.11)</b>         | <b>0.116</b> |                     |
| SGA: NeOProM defined - No  | SUPPORT        | 50 (12.4)                      | 402         | 64 (15.2)                       | 420         | 0.81 (0.57, 1.16)                | 0.256        | 0.382               |
|                            | COT            | 54 (13.1)                      | 411         | 52 (12.3)                       | 422         | 1.04 (0.74, 1.47)                | 0.812        |                     |
|                            | BOOST II NZ    | 3 (3.2)                        | 95          | 1 (1.0)                         | 98          | 3.09 (0.33, 28.7)                | 0.322        |                     |
|                            | BOOST II UK    | 30 (13.8)                      | 218         | 22 (9.9)                        | 222         | 1.37 (0.76, 2.47)                | 0.290        |                     |
|                            | BOOST II AUS   | 32 (9.3)                       | 344         | 27 (7.5)                        | 358         | 1.20 (0.75, 1.93)                | 0.446        |                     |
|                            | <b>NeOProM</b> | <b>169 (11.5)</b>              | <b>1470</b> | <b>166 (10.9)</b>               | <b>1520</b> | <b>1.04 (0.85, 1.27)</b>         | <b>0.732</b> |                     |
| Yes                        | SUPPORT        | 19 (31.7)                      | 60          | 21 (26.9)                       | 78          | 1.07 (0.62, 1.84)                | 0.801        |                     |
|                            | COT            | 3 (7.9)                        | 38          | 5 (15.6)                        | 32          | 0.73 (0.45, 1.19)                | 0.207        |                     |
|                            | BOOST II NZ    | 4 (26.7)                       | 15          | 2 (25.0)                        | 8           | 1.00 (0.23, 4.35)                | 0.999        |                     |
|                            | BOOST II UK    | 2 (9.1)                        | 22          | 4 (16.0)                        | 25          | 0.57 (0.11, 2.81)                | 0.488        |                     |
|                            | BOOST II AUS   | 3 (6.1)                        | 49          | 8 (14.3)                        | 56          | 0.43 (0.12, 1.53)                | 0.191        |                     |
|                            | <b>NeOProM</b> | <b>31 (16.8)</b>               | <b>184</b>  | <b>40 (20.1)</b>                | <b>199</b>  | <b>0.86 (0.57, 1.30)</b>         | <b>0.700</b> |                     |

\* Analysis adjusted for trials and multiple births

## Abbreviations/definitions

CI: confidence interval; RR: relative risk; GA: gestational age; SUPPORT: Surfactant Positive Airway Pressure and Pulse Oximetry Trial; COT: Canadian Oxygen Trial; BOOST: Benefits of Oxygen Saturation Targeting; NZ: New Zealand; UK: United Kingdom; AUS: Australia; NeOProM: Neonatal Oxygenation Prospective Meta-analysis; inborn: born inside the treating center; outborn: born outside the treating center (e.g. transferred from another hospital); vaginal: mode of delivery through the vagina; Caesarean: mode of delivery via surgical procedure; ANS: antenatal corticosteroids; singleton: child born as a single birth; multiple: more than one child per birth; start<6 hrs: intervention commenced less than 6 hours after birth; start>=6 hrs: intervention commenced greater than or equal to 6 hours after birth; original software: original oximeter software; revised software: revised oximeter software; SGA: small for gestational age; SGA NeOProM defined: small for gestational age as per definition used by NeOProM collaboration, i.e. less than 10th percentile using charts from Kramer et al.<sup>1</sup>

The subgroup analysis by oximeter software type (original vs revised) excludes n=74 infants in COT who were exposed to both the original and revised software.

Empty cells (.) indicate data not collected or not applicable in this trial.

These analyses exclude infants in SUPPORT and COT where values of Bayley-III were imputed for infants who had unsuccessful Bayley-III assessments due to severe developmental delay or autism.

\*\*\* Low / no event rate(s) makes parameter not estimable.

eTable 24. Patent ductus arteriosus (PDA) medically or surgically treated, by subgroups

|           |                | Lower Oxygen Saturation Target |             | Higher Oxygen Saturation Target |             | Adjusted* Relative Risk (95% CI) |              |                     |
|-----------|----------------|--------------------------------|-------------|---------------------------------|-------------|----------------------------------|--------------|---------------------|
| Subgroup  | Trial          | n (%)                          | N           | n (%)                           | N           | Adjusted RR                      | p-value      | interaction p-value |
| GA<26 wks | SUPPORT        | 118 (44.4)                     | 266         | 116 (42.0)                      | 276         | 1.07 (0.87, 1.30)                | 0.526        | 0.462               |
|           | COT            | 173 (66.5)                     | 260         | 176 (69.8)                      | 252         | 0.94 (0.83, 1.06)                | 0.288        |                     |
|           | BOOST NZ       | 54 (75.0)                      | 72          | 46 (63.9)                       | 72          | 1.17 (0.94, 1.46)                | 0.153        |                     |
|           | BOOST II UK    | 102 (47.7)                     | 214         | 111 (52.1)                      | 213         | 0.90 (0.75, 1.09)                | 0.279        |                     |
|           | BOOST II AUS   | 155 (64.3)                     | 241         | 155 (64.6)                      | 240         | 1.00 (0.88, 1.14)                | 0.993        |                     |
|           | <b>NeOProM</b> | <b>602 (57.2)</b>              | <b>1053</b> | <b>604 (57.4)</b>               | <b>1053</b> | <b>0.99 (0.92, 1.06)</b>         | <b>0.739</b> |                     |
| GA≥26 wks | SUPPORT        | 116 (31.4)                     | 369         | 126 (34.1)                      | 369         | 0.92 (0.75, 1.14)                | 0.457        |                     |
|           | COT            | 151 (44.2)                     | 342         | 156 (45.0)                      | 347         | 0.97 (0.83, 1.14)                | 0.734        |                     |
|           | BOOST NZ       | 50 (51.0)                      | 98          | 44 (44.9)                       | 98          | 1.15 (0.87, 1.53)                | 0.319        |                     |
|           | BOOST II UK    | 96 (35.8)                      | 268         | 75 (27.8)                       | 270         | 1.30 (1.01, 1.68)                | 0.044        |                     |
|           | BOOST II AUS   | 124 (38.0)                     | 326         | 122 (37.4)                      | 326         | 0.99 (0.81, 1.20)                | 0.899        |                     |
|           | <b>NeOProM</b> | <b>537 (38.3)</b>              | <b>1403</b> | <b>523 (37.1)</b>               | <b>1410</b> | <b>1.03 (0.94, 1.13)</b>         | <b>0.493</b> |                     |
| Inborn    | SUPPORT        | 234 (36.9)                     | 635         | 242 (37.5)                      | 645         | 0.99 (0.86, 1.15)                | 0.899        | 0.006               |
|           | COT            | 304 (54.1)                     | 562         | 306 (56.4)                      | 543         | 0.95 (0.86, 1.05)                | 0.305        |                     |
|           | BOOST NZ       | 98 (61.6)                      | 159         | 86 (54.8)                       | 157         | 1.13 (0.94, 1.36)                | 0.185        |                     |
|           | BOOST II UK    | 169 (39.8)                     | 425         | 168 (39.6)                      | 424         | 1.01 (0.86, 1.18)                | 0.948        |                     |
|           | BOOST II AUS   | 251 (48.0)                     | 523         | 259 (49.4)                      | 524         | 0.96 (0.85, 1.09)                | 0.564        |                     |
|           | <b>NeOProM</b> | <b>1056 (45.8)</b>             | <b>2304</b> | <b>1061 (46.3)</b>              | <b>2293</b> | <b>0.99 (0.93, 1.05)</b>         | <b>0.717</b> |                     |
| Outborn   | SUPPORT        | .                              | .           | .                               | .           | .                                | .            |                     |
|           | COT            | 20 (50.0)                      | 40          | 26 (46.4)                       | 56          | 1.05 (0.72, 1.54)                | 0.786        |                     |
|           | BOOST NZ       | 6 (54.5)                       | 11          | 4 (30.8)                        | 13          | 1.54 (0.70, 3.39)                | 0.279        |                     |
|           | BOOST II UK    | 29 (50.9)                      | 57          | 18 (30.5)                       | 59          | 1.61 (1.06, 2.43)                | 0.024        |                     |
|           | BOOST II AUS   | 28 (63.6)                      | 44          | 18 (42.9)                       | 42          | 1.47 (0.97, 2.24)                | 0.070        |                     |
|           | <b>NeOProM</b> | <b>83 (54.6)</b>               | <b>152</b>  | <b>66 (38.8)</b>                | <b>170</b>  | <b>1.35 (1.08, 1.69)</b>         | <b>0.008</b> |                     |
| Vaginal   | SUPPORT        | 64 (30.6)                      | 209         | 80 (36.9)                       | 217         | 0.81 (0.62, 1.08)                | 0.149        | 0.533               |
|           | COT            | 107 (48.2)                     | 222         | 122 (50.2)                      | 243         | 0.95 (0.79, 1.14)                | 0.586        |                     |
|           | BOOST NZ       | 40 (53.3)                      | 75          | 40 (50.6)                       | 79          | 1.05 (0.77, 1.44)                | 0.746        |                     |
|           | BOOST II UK    | 124 (42.9)                     | 289         | 120 (40.3)                      | 298         | 1.09 (0.90, 1.32)                | 0.398        |                     |
|           | BOOST II AUS   | 148 (54.4)                     | 272         | 121 (47.1)                      | 257         | 1.15 (0.98, 1.36)                | 0.094        |                     |
|           | <b>NeOProM</b> | <b>483 (45.3)</b>              | <b>1067</b> | <b>483 (44.1)</b>               | <b>1094</b> | <b>1.04 (0.94, 1.14)</b>         | <b>0.451</b> |                     |
| Caesarean | SUPPORT        | 170 (39.9)                     | 426         | 162 (37.9)                      | 428         | 1.08 (0.90, 1.28)                | 0.413        |                     |
|           | COT            | 214 (56.8)                     | 377         | 209 (58.9)                      | 355         | 0.95 (0.84, 1.07)                | 0.404        |                     |
|           | BOOST NZ       | 64 (67.4)                      | 95          | 50 (54.9)                       | 91          | 1.24 (1.00, 1.54)                | 0.051        |                     |
|           | BOOST II UK    | 74 (38.3)                      | 193         | 66 (35.7)                       | 185         | 1.01 (0.81, 1.27)                | 0.935        |                     |
|           | BOOST II AUS   | 131 (44.6)                     | 294         | 155 (50.8)                      | 305         | 0.88 (0.74, 1.04)                | 0.121        |                     |
|           | <b>NeOProM</b> | <b>653 (47.1)</b>              | <b>1385</b> | <b>642 (47.1)</b>               | <b>1364</b> | <b>1.00 (0.92, 1.07)</b>         | <b>0.909</b> |                     |
| ANS - No  | SUPPORT        | 9 (42.9)                       | 21          | 13 (44.8)                       | 29          | 0.99 (0.52, 1.87)                | 0.971        | 0.212               |
|           | COT            | 39 (55.7)                      | 70          | 36 (59.0)                       | 61          | 0.96 (0.73, 1.26)                | 0.769        |                     |
|           | BOOST NZ       | 14 (70.0)                      | 20          | 6 (33.3)                        | 18          | 1.77 (0.92, 3.42)                | 0.089        |                     |
|           | BOOST II UK    | 16 (40.0)                      | 40          | 15 (31.3)                       | 48          | 2.28 (0.87, 5.98)                | 0.094        |                     |

**eTable 24. Patent ductus arteriosus (PDA) medically or surgically treated, by subgroups (continued)**

|             |                | Lower Oxygen Saturation Target |             | Higher Oxygen Saturation Target |             | Adjusted* Relative Risk (95% CI) |              |                     |
|-------------|----------------|--------------------------------|-------------|---------------------------------|-------------|----------------------------------|--------------|---------------------|
| Subgroup    | Trial          | n (%)                          | N           | n (%)                           | N           | Adjusted RR                      | p-value      | interaction p-value |
|             | BOOST II AUS   | 34 (53.1)                      | 64          | 19 (45.2)                       | 42          | 1.16 (0.76, 1.77)                | 0.480        |                     |
|             | <b>NeOProM</b> | <b>112 (52.1)</b>              | <b>215</b>  | <b>89 (44.9)</b>                | <b>198</b>  | <b>1.12 (0.92, 1.36)</b>         | <b>0.259</b> |                     |
| ANS - Yes   | SUPPORT        | 225 (36.6)                     | 614         | 229 (37.2)                      | 615         | 1.00 (0.86, 1.16)                | 0.960        |                     |
|             | COT            | 283 (53.4)                     | 530         | 295 (55.0)                      | 536         | 0.95 (0.86, 1.06)                | 0.390        |                     |
|             | BOOST NZ       | 90 (60.0)                      | 150         | 84 (55.3)                       | 152         | 1.10 (0.91, 1.33)                | 0.308        |                     |
|             | BOOST II UK    | 182 (41.4)                     | 440         | 171 (39.5)                      | 433         | 1.04 (0.89, 1.21)                | 0.657        |                     |
|             | BOOST II AUS   | 243 (48.5)                     | 501         | 256 (49.4)                      | 518         | 0.98 (0.87, 1.11)                | 0.727        |                     |
|             | <b>NeOProM</b> | <b>1023 (45.8)</b>             | <b>2235</b> | <b>1035 (45.9)</b>              | <b>2254</b> | <b>1.00 (0.94, 1.06)</b>         | <b>0.910</b> |                     |
| Male        | SUPPORT        | 130 (39.5)                     | 329         | 144 (39.5)                      | 365         | 1.01 (0.84, 1.22)                | 0.936        | 0.722               |
|             | COT            | 181 (55.0)                     | 329         | 183 (56.1)                      | 326         | 0.99 (0.87, 1.14)                | 0.922        |                     |
|             | BOOST NZ       | 55 (61.1)                      | 90          | 48 (53.3)                       | 90          | 1.14 (0.90, 1.46)                | 0.279        |                     |
|             | BOOST II UK    | 108 (42.2)                     | 256         | 104 (40.6)                      | 256         | 1.08 (0.89, 1.32)                | 0.433        |                     |
|             | BOOST II AUS   | 147 (50.2)                     | 293         | 141 (47.6)                      | 296         | 1.01 (0.85, 1.19)                | 0.950        |                     |
|             | <b>NeOProM</b> | <b>621 (47.9)</b>              | <b>1297</b> | <b>620 (46.5)</b>               | <b>1333</b> | <b>1.03 (0.95, 1.11)</b>         | <b>0.521</b> |                     |
| Female      | SUPPORT        | 104 (34.0)                     | 306         | 98 (35.0)                       | 280         | 0.98 (0.78, 1.23)                | 0.843        |                     |
|             | COT            | 143 (52.4)                     | 273         | 149 (54.6)                      | 273         | 0.96 (0.82, 1.11)                | 0.550        |                     |
|             | BOOST NZ       | 49 (61.3)                      | 80          | 42 (52.5)                       | 80          | 1.18 (0.90, 1.56)                | 0.227        |                     |
|             | BOOST II UK    | 90 (39.8)                      | 226         | 82 (36.1)                       | 227         | 1.06 (0.83, 1.34)                | 0.634        |                     |
|             | BOOST II AUS   | 132 (48.2)                     | 274         | 136 (50.4)                      | 270         | 1.01 (0.85, 1.19)                | 0.953        |                     |
|             | <b>NeOProM</b> | <b>518 (44.7)</b>              | <b>1159</b> | <b>507 (44.9)</b>               | <b>1130</b> | <b>1.01 (0.92, 1.10)</b>         | <b>0.853</b> |                     |
| Singleton   | SUPPORT        | 171 (35.5)                     | 482         | 165 (34.8)                      | 474         | 1.02 (0.86, 1.21)                | 0.829        | 0.792               |
|             | COT            | 206 (52.0)                     | 396         | 217 (52.0)                      | 417         | 1.00 (0.88, 1.14)                | 0.996        |                     |
|             | BOOST NZ       | 72 (58.1)                      | 124         | 67 (54.0)                       | 124         | 1.07 (0.86, 1.34)                | 0.523        |                     |
|             | BOOST II UK    | 121 (35.2)                     | 344         | 131 (37.6)                      | 348         | 0.93 (0.77, 1.14)                | 0.500        |                     |
|             | BOOST II AUS   | 199 (46.4)                     | 429         | 199 (46.1)                      | 432         | 1.01 (0.87, 1.16)                | 0.924        |                     |
|             | <b>NeOProM</b> | <b>769 (43.3)</b>              | <b>1775</b> | <b>779 (43.4)</b>               | <b>1795</b> | <b>1.00 (0.93, 1.08)</b>         | <b>0.921</b> |                     |
| Multiple    | SUPPORT        | 63 (41.2)                      | 153         | 77 (45.0)                       | 171         | 0.92 (0.70, 1.22)                | 0.574        |                     |
|             | COT            | 118 (57.3)                     | 206         | 115 (63.2)                      | 182         | 0.90 (0.78, 1.04)                | 0.138        |                     |
|             | BOOST NZ       | 32 (69.6)                      | 46          | 23 (50.0)                       | 46          | 1.42 (1.03, 1.97)                | 0.032        |                     |
|             | BOOST II UK    | 77 (55.8)                      | 138         | 55 (40.7)                       | 135         | 1.23 (1.00, 1.51)                | 0.045        |                     |
|             | BOOST II AUS   | 80 (58.0)                      | 138         | 78 (58.2)                       | 134         | 0.98 (0.82, 1.17)                | 0.817        |                     |
|             | <b>NeOProM</b> | <b>370 (54.3)</b>              | <b>681</b>  | <b>348 (52.1)</b>               | <b>668</b>  | <b>1.02 (0.93, 1.11)</b>         | <b>0.710</b> |                     |
| start<6 hrs | SUPPORT        | 230 (36.9)                     | 623         | 239 (37.7)                      | 634         | 0.99 (0.85, 1.15)                | 0.868        | 0.650               |
|             | COT            | 18 (66.7)                      | 27          | 15 (57.7)                       | 26          | 1.18 (0.79, 1.75)                | 0.420        |                     |
|             | BOOST NZ       | 19 (67.9)                      | 28          | 16 (57.1)                       | 28          | 1.13 (0.75, 1.68)                | 0.559        |                     |
|             | BOOST II UK    |                                | .           |                                 | .           |                                  | .            |                     |
|             | BOOST II AUS   | 28 (47.5)                      | 59          | 28 (46.7)                       | 60          | 0.91 (0.57, 1.46)                | 0.693        |                     |
|             | <b>NeOProM</b> | <b>295 (40.0)</b>              | <b>737</b>  | <b>298 (39.8)</b>               | <b>748</b>  | <b>1.03 (0.91, 1.16)</b>         | <b>0.673</b> |                     |
| >=6 hrs     | SUPPORT        | 2 (40.0)                       | 5           | 1 (20.0)                        | 5           | 1.85 (0.23, 14.9)                | 0.562        |                     |
|             | COT            | 306 (53.2)                     | 575         | 317 (55.3)                      | 573         | 0.95 (0.86, 1.05)                | 0.314        |                     |
|             | BOOST NZ       | 85 (59.9)                      | 142         | 73 (51.8)                       | 141         | 1.16 (0.95, 1.43)                | 0.143        |                     |

**eTable 24. Patent ductus arteriosus (PDA) medically or surgically treated, by subgroups (continued)**

|           |                | Lower Oxygen Saturation Target |             | Higher Oxygen Saturation Target |             | Adjusted* Relative Risk (95% CI) |              |                     |
|-----------|----------------|--------------------------------|-------------|---------------------------------|-------------|----------------------------------|--------------|---------------------|
| Subgroup  | Trial          | n (%)                          | N           | n (%)                           | N           | Adjusted RR                      | p-value      | interaction p-value |
|           | BOOST II UK    |                                | .           |                                 | .           |                                  | .            |                     |
|           | BOOST II AUS   | 249 (49.2)                     | 506         | 249 (49.3)                      | 505         | 1.00 (0.89, 1.13)                | 0.999        |                     |
|           | <b>NeOProM</b> | <b>642 (52.3)</b>              | <b>1228</b> | <b>640 (52.3)</b>               | <b>1224</b> | <b>0.99 (0.92, 1.07)</b>         | <b>0.871</b> |                     |
| Original  | SUPPORT        | 234 (36.9)                     | 635         | 242 (37.5)                      | 645         | 0.99 (0.86, 1.15)                | 0.899        | 0.985               |
| software  | COT            | 149 (52.1)                     | 286         | 148 (53.2)                      | 278         | 0.96 (0.82, 1.11)                | 0.572        |                     |
|           | BOOST NZ       | 104 (61.2)                     | 170         | 90 (52.9)                       | 170         | 1.17 (0.97, 1.40)                | 0.097        |                     |
|           | BOOST II UK    | 46 (40.7)                      | 113         | 47 (41.2)                       | 114         | 1.04 (0.75, 1.42)                | 0.827        |                     |
|           | BOOST II AUS   | 165 (47.7)                     | 346         | 166 (48.1)                      | 345         | 0.98 (0.84, 1.15)                | 0.807        |                     |
|           | <b>NeOProM</b> | <b>698 (45.0)</b>              | <b>1550</b> | <b>693 (44.7)</b>               | <b>1552</b> | <b>1.01 (0.94, 1.10)</b>         | <b>0.711</b> |                     |
| Revised   | SUPPORT        |                                | .           |                                 | .           |                                  | .            |                     |
| software  | COT            | 158 (55.6)                     | 284         | 158 (56.6)                      | 279         | 0.96 (0.83, 1.11)                | 0.598        |                     |
|           | BOOST NZ       |                                | .           |                                 | .           |                                  | .            |                     |
|           | BOOST II UK    | 152 (41.2)                     | 369         | 139 (37.7)                      | 369         | 1.07 (0.91, 1.27)                | 0.410        |                     |
|           | BOOST II AUS   | 114 (51.6)                     | 221         | 111 (50.2)                      | 221         | 1.03 (0.87, 1.22)                | 0.714        |                     |
|           | <b>NeOProM</b> | <b>424 (48.5)</b>              | <b>874</b>  | <b>408 (47.0)</b>               | <b>869</b>  | <b>1.01 (0.92, 1.11)</b>         | <b>0.865</b> |                     |
| SGA:      | SUPPORT        | 223 (37.5)                     | 594         | 228 (38.4)                      | 594         | 0.98 (0.85, 1.14)                | 0.830        | 0.307               |
| Trialist  | COT            | 299 (54.6)                     | 548         | 300 (54.7)                      | 548         | 0.98 (0.88, 1.08)                | 0.641        |                     |
| defined - | BOOST II NZ    | 91 (59.5)                      | 153         | 81 (51.6)                       | 157         | 1.17 (0.96, 1.43)                | 0.109        |                     |
| No        | BOOST II UK    | 170 (41.9)                     | 406         | 157 (38.5)                      | 408         | 1.09 (0.92, 1.28)                | 0.322        |                     |
|           | BOOST II AUS   | 243 (49.9)                     | 487         | 237 (48.6)                      | 488         | 1.01 (0.89, 1.15)                | 0.845        |                     |
|           | <b>NeOProM</b> | <b>1026(46.9)</b>              | <b>2188</b> | <b>1003(45.7)</b>               | <b>2195</b> | <b>1.02 (0.96, 1.09)</b>         | <b>0.487</b> |                     |
| Yes       | SUPPORT        | 11 (26.8)                      | 41          | 14 (27.5)                       | 51          | 0.97 (0.49, 1.90)                | 0.922        |                     |
|           | COT            | 25 (46.3)                      | 54          | 32 (62.7)                       | 51          | 0.73 (0.51, 1.04)                | 0.085        |                     |
|           | BOOST II NZ    | 13 (76.5)                      | 17          | 9 (69.2)                        | 13          | 1.40 (1.03, 1.92)                | 0.033        |                     |
|           | BOOST II UK    | 28 (37.8)                      | 74          | 27 (37.5)                       | 72          | 0.35 (0.05, 2.24)                | 0.265        |                     |
|           | BOOST II AUS   | 36 (45.0)                      | 80          | 40 (51.3)                       | 78          | 0.88 (0.63, 1.21)                | 0.421        |                     |
|           | <b>NeOProM</b> | <b>113 (42.5)</b>              | <b>266</b>  | <b>122 (46.0)</b>               | <b>265</b>  | <b>0.91 (0.76, 1.09)</b>         | <b>0.308</b> |                     |
| SGA:      | SUPPORT        | 200 (36.8)                     | 543         | 208 (39.0)                      | 534         | 0.95 (0.81, 1.11)                | 0.535        | 0.433               |
| NeOProM   | COT            | 299 (54.6)                     | 548         | 300 (54.7)                      | 548         | 0.98 (0.88, 1.08)                | 0.641        |                     |
| defined - | BOOST II NZ    | 91 (59.5)                      | 153         | 81 (51.6)                       | 157         | 1.17 (0.96, 1.43)                | 0.109        |                     |
| No        | BOOST II UK    | 177 (41.5)                     | 426         | 163 (38.2)                      | 427         | 1.09 (0.93, 1.28)                | 0.307        |                     |
|           | BOOST II AUS   | 243 (49.9)                     | 487         | 237 (48.6)                      | 488         | 1.01 (0.89, 1.15)                | 0.845        |                     |
|           | <b>NeOProM</b> | <b>1010(46.8)</b>              | <b>2157</b> | <b>989 (45.9)</b>               | <b>2154</b> | <b>1.02 (0.96, 1.08)</b>         | <b>0.580</b> |                     |
| Yes       | SUPPORT        | 34 (37.0)                      | 92          | 34 (30.6)                       | 111         | 1.27 (0.87, 1.85)                | 0.218        |                     |
|           | COT            | 25 (46.3)                      | 54          | 32 (62.7)                       | 51          | 0.73 (0.51, 1.04)                | 0.085        |                     |
|           | BOOST II NZ    | 13 (76.5)                      | 17          | 9 (69.2)                        | 13          | 1.40 (1.03, 1.92)                | 0.033        |                     |
|           | BOOST II UK    | 21 (37.5)                      | 56          | 23 (41.1)                       | 56          | 0.91 (0.57, 1.46)                | 0.692        |                     |
|           | BOOST II AUS   | 36 (45.0)                      | 80          | 40 (51.3)                       | 78          | 0.88 (0.63, 1.21)                | 0.421        |                     |
|           | <b>NeOProM</b> | <b>129 (43.1)</b>              | <b>299</b>  | <b>138 (44.7)</b>               | <b>309</b>  | <b>0.94 (0.80, 1.12)</b>         | <b>0.499</b> |                     |

\* Analysis adjusted for trials and multiple births

## Abbreviations/definitions

CI: confidence interval; RR: relative risk; GA: gestational age; SUPPORT: Surfactant Positive Airway Pressure and Pulse Oximetry Trial; COT: Canadian Oxygen Trial; BOOST: Benefits of Oxygen Saturation Targeting; NZ: New Zealand; UK: United Kingdom; AUS: Australia; NeOProM: Neonatal Oxygenation Prospective Meta-analysis; inborn: born inside the treating center; outborn: born outside the treating center (e.g. transferred from another hospital); vaginal: mode of delivery through the vagina; Caesarean: mode of delivery via surgical procedure; ANS: antenatal corticosteroids; singleton: child born as a single birth; multiple: more than one child per birth; start<6 hrs: intervention commenced less than 6 hours after birth; start>=6 hrs: intervention commenced greater than or equal to 6 hours after birth; original software: original oximeter software; revised software: revised oximeter software; SGA: small for gestational age; SGA NeOProM defined: small for gestational age as per definition used by NeOProM collaboration, i.e. less than 10th percentile using charts from Kramer et al.<sup>1</sup>

The subgroup analysis by oximeter software type (original vs revised) excludes n=74 infants in COT who were exposed to both the original and revised software.

Empty cells (.) indicate data not collected or not applicable in this trial.

**eTable 25. Patent ductus arteriosus (PDA) surgically treated, by subgroups**

|           |                | Lower Oxygen Saturation Target |             | Higher Oxygen Saturation Target |             | Adjusted* Relative Risk (95% CI) |              |                     |
|-----------|----------------|--------------------------------|-------------|---------------------------------|-------------|----------------------------------|--------------|---------------------|
| Subgroup  | Trial          | n (%)                          | N           | n (%)                           | N           | Adjusted RR                      | p-value      | interaction p-value |
| GA<26 wks | SUPPORT        | 48 (17.8)                      | 269         | 44 (15.8)                       | 278         | 1.12 (0.76, 1.64)                | 0.569        | 0.184               |
|           | COT            | 67 (25.8)                      | 260         | 66 (26.2)                       | 252         | 0.98 (0.73, 1.30)                | 0.882        |                     |
|           | BOOST NZ       | 9 (12.5)                       | 72          | 9 (12.5)                        | 72          | 1.02 (0.50, 2.07)                | 0.957        |                     |
|           | BOOST II UK    | 37 (17.3)                      | 214         | 34 (16.0)                       | 213         | 1.09 (0.71, 1.67)                | 0.694        |                     |
|           | BOOST II AUS   | 29 (12.0)                      | 241         | 20 (8.4)                        | 238         | 3.85 (1.38, 10.7)                | 0.010        |                     |
|           | <b>NeOProM</b> | <b>190 (18.0)</b>              | <b>1056</b> | <b>173 (16.4)</b>               | <b>1053</b> | <b>1.09 (0.91, 1.31)</b>         | <b>0.357</b> |                     |
| GA≥26 wks | SUPPORT        | 25 (6.7)                       | 372         | 24 (6.5)                        | 370         | 1.11 (0.62, 1.96)                | 0.726        |                     |
|           | COT            | 30 (8.8)                       | 342         | 27 (7.8)                        | 347         | 1.16 (0.71, 1.90)                | 0.563        |                     |
|           | BOOST NZ       | 3 (3.1)                        | 98          | 2 (2.0)                         | 98          | 1.56 (0.26, 9.25)                | 0.627        |                     |
|           | BOOST II UK    | 25 (9.3)                       | 268         | 11 (4.1)                        | 270         | 1.88 (0.83, 4.26)                | 0.130        |                     |
|           | BOOST II AUS   | 8 (2.5)                        | 326         | 3 (0.9)                         | 326         | 2.66 (0.72, 9.85)                | 0.143        |                     |
|           | <b>NeOProM</b> | <b>91 (6.5)</b>                | <b>1406</b> | <b>67 (4.7)</b>                 | <b>1411</b> | <b>1.38 (1.02, 1.89)</b>         | <b>0.039</b> |                     |
| Inborn    | SUPPORT        | 73 (11.4)                      | 641         | 68 (10.5)                       | 648         | 1.11 (0.80, 1.53)                | 0.535        | 0.367               |
|           | COT            | 91 (16.2)                      | 562         | 85 (15.7)                       | 543         | 1.04 (0.80, 1.36)                | 0.774        |                     |
|           | BOOST NZ       | 11 (6.9)                       | 159         | 10 (6.4)                        | 157         | 1.07 (0.53, 2.18)                | 0.847        |                     |
|           | BOOST II UK    | 54 (12.7)                      | 425         | 40 (9.4)                        | 424         | 1.32 (0.89, 1.96)                | 0.173        |                     |
|           | BOOST II AUS   | 33 (6.3)                       | 523         | 23 (4.4)                        | 522         | 1.79 (1.08, 2.98)                | 0.024        |                     |
|           | <b>NeOProM</b> | <b>262 (11.3)</b>              | <b>2310</b> | <b>226 (9.9)</b>                | <b>2294</b> | <b>1.16 (0.98, 1.37)</b>         | <b>0.089</b> |                     |
| Outborn   | SUPPORT        | .                              | .           | .                               | .           | .                                | .            |                     |
|           | COT            | 6 (15.0)                       | 40          | 8 (14.3)                        | 56          | 1.05 (0.40, 2.79)                | 0.872        |                     |
|           | BOOST NZ       | 1 (9.1)                        | 11          | 1 (7.7)                         | 13          | 1.17 (0.09, 15.9)                | 0.907        |                     |
|           | BOOST II UK    | 8 (14.0)                       | 57          | 5 (8.5)                         | 59          | 1.67 (0.57, 4.87)                | 0.352        |                     |
|           | BOOST II AUS   | 4 (9.1)                        | 44          | 0                               | 42          |                                  | ***          |                     |
|           | <b>NeOProM</b> | <b>19 (12.5)</b>               | <b>152</b>  | <b>14 (8.2)</b>                 | <b>170</b>  | <b>1.55 (0.84, 2.86)</b>         | <b>0.157</b> |                     |
| Vaginal   | SUPPORT        | 24 (11.3)                      | 212         | 26 (12.0)                       | 217         | 0.82 (0.47, 1.43)                | 0.492        | 0.110               |
|           | COT            | 33 (14.9)                      | 222         | 37 (15.2)                       | 243         | 0.93 (0.61, 1.42)                | 0.732        |                     |
|           | BOOST NZ       | 6 (8.0)                        | 75          | 5 (6.3)                         | 79          | 1.23 (0.39, 3.88)                | 0.723        |                     |
|           | BOOST II UK    | 37 (12.8)                      | 289         | 36 (12.1)                       | 298         | 1.06 (0.69, 1.63)                | 0.794        |                     |
|           | BOOST II AUS   | 19 (7.0)                       | 272         | 13 (5.1)                        | 257         | 1.91 (0.61, 5.94)                | 0.263        |                     |
|           | <b>NeOProM</b> | <b>119 (11.1)</b>              | <b>1070</b> | <b>117 (10.7)</b>               | <b>1094</b> | <b>1.01 (0.78, 1.29)</b>         | <b>0.967</b> |                     |
| Caesarean | SUPPORT        | 49 (11.4)                      | 429         | 42 (9.7)                        | 431         | 1.23 (0.83, 1.84)                | 0.304        |                     |
|           | COT            | 64 (17.0)                      | 377         | 55 (15.5)                       | 355         | 1.11 (0.81, 1.54)                | 0.514        |                     |
|           | BOOST NZ       | 6 (6.3)                        | 95          | 6 (6.6)                         | 91          | 0.86 (0.38, 1.97)                | 0.723        |                     |
|           | BOOST II UK    | 25 (13.0)                      | 193         | 9 (4.9)                         | 185         | 2.12 (0.90, 5.03)                | 0.087        |                     |
|           | BOOST II AUS   | 18 (6.1)                       | 294         | 10 (3.3)                        | 303         | 2.18 (1.01, 4.73)                | 0.048        |                     |
|           | <b>NeOProM</b> | <b>162 (11.7)</b>              | <b>1388</b> | <b>122 (8.9)</b>                | <b>1365</b> | <b>1.33 (1.07, 1.65)</b>         | <b>0.011</b> |                     |
| ANS - No  | SUPPORT        | 4 (19.0)                       | 21          | 2 (6.9)                         | 29          | 2.66 (0.53, 13.3)                | 0.233        | 0.399               |
|           | COT            | 11 (15.7)                      | 70          | 10 (16.4)                       | 61          | 0.92 (0.41, 2.03)                | 0.830        |                     |
|           | BOOST NZ       | 2 (10.0)                       | 20          | 0                               | 18          |                                  | ***          |                     |
|           | BOOST II UK    | 3 (7.5)                        | 40          | 5 (10.4)                        | 48          | 0.04 (0.00, 10.0)                | 0.260        |                     |

eTable 25. Patent ductus arteriosus (PDA) surgically treated, by subgroups (continued)

|             |                | Lower Oxygen Saturation Target |             | Higher Oxygen Saturation Target |             | Adjusted* Relative Risk (95% CI) |              |                     |
|-------------|----------------|--------------------------------|-------------|---------------------------------|-------------|----------------------------------|--------------|---------------------|
| Subgroup    | Trial          | n (%)                          | N           | n (%)                           | N           | Adjusted RR                      | p-value      | interaction p-value |
|             | BOOST II AUS   | 9 (14.1)                       | 64          | 1 (2.4)                         | 42          | 5.94 (0.78, 45.4)                | 0.086        |                     |
|             | <b>NeOProM</b> | <b>29 (13.5)</b>               | <b>215</b>  | <b>18 (9.1)</b>                 | <b>198</b>  | <b>1.48 (0.85, 2.58)</b>         | <b>0.170</b> |                     |
| ANS - Yes   | SUPPORT        | 69 (11.1)                      | 620         | 66 (10.7)                       | 618         | 1.07 (0.77, 1.49)                | 0.688        |                     |
|             | COT            | 86 (16.2)                      | 530         | 83 (15.5)                       | 536         | 1.05 (0.80, 1.37)                | 0.745        |                     |
|             | BOOST NZ       | 10 (6.7)                       | 150         | 11 (7.2)                        | 152         | 0.91 (0.45, 1.85)                | 0.793        |                     |
|             | BOOST II UK    | 59 (13.4)                      | 440         | 40 (9.2)                        | 433         | 1.44 (0.98, 2.11)                | 0.064        |                     |
|             | BOOST II AUS   | 28 (5.6)                       | 501         | 22 (4.3)                        | 516         | 1.79 (1.03, 3.11)                | 0.040        |                     |
|             | <b>NeOProM</b> | <b>252 (11.2)</b>              | <b>2241</b> | <b>222 (9.8)</b>                | <b>2255</b> | <b>1.15 (0.97, 1.36)</b>         | <b>0.103</b> |                     |
| Male        | SUPPORT        | 36 (10.8)                      | 333         | 38 (10.4)                       | 366         | 1.12 (0.72, 1.75)                | 0.624        | 0.989               |
|             | COT            | 48 (14.6)                      | 329         | 47 (14.4)                       | 326         | 1.04 (0.72, 1.49)                | 0.847        |                     |
|             | BOOST NZ       | 5 (5.6)                        | 90          | 6 (6.7)                         | 90          | 0.83 (0.26, 2.62)                | 0.751        |                     |
|             | BOOST II UK    | 33 (12.9)                      | 256         | 27 (10.5)                       | 256         | 1.20 (0.76, 1.91)                | 0.433        |                     |
|             | BOOST II AUS   | 17 (5.8)                       | 293         | 7 (2.4)                         | 296         | 3.60 (1.38, 9.38)                | 0.009        |                     |
|             | <b>NeOProM</b> | <b>139 (10.7)</b>              | <b>1301</b> | <b>125 (9.4)</b>                | <b>1334</b> | <b>1.18 (0.94, 1.47)</b>         | <b>0.156</b> |                     |
| Female      | SUPPORT        | 37 (12.0)                      | 308         | 30 (10.6)                       | 282         | 1.09 (0.69, 1.74)                | 0.712        |                     |
|             | COT            | 49 (17.9)                      | 273         | 46 (16.8)                       | 273         | 1.07 (0.74, 1.53)                | 0.732        |                     |
|             | BOOST NZ       | 7 (8.8)                        | 80          | 5 (6.3)                         | 80          | 1.11 (0.75, 1.64)                | 0.614        |                     |
|             | BOOST II UK    | 29 (12.8)                      | 226         | 18 (7.9)                        | 227         | 1.54 (0.87, 2.71)                | 0.138        |                     |
|             | BOOST II AUS   | 20 (7.3)                       | 274         | 16 (6.0)                        | 268         | 1.34 (0.73, 2.48)                | 0.344        |                     |
|             | <b>NeOProM</b> | <b>142 (12.2)</b>              | <b>1161</b> | <b>115 (10.2)</b>               | <b>1130</b> | <b>1.19 (0.94, 1.49)</b>         | <b>0.141</b> |                     |
| Singleton   | SUPPORT        | 56 (11.5)                      | 485         | 46 (9.6)                        | 477         | 1.20 (0.83, 1.73)                | 0.339        | 0.346               |
|             | COT            | 64 (16.2)                      | 396         | 64 (15.3)                       | 417         | 1.05 (0.77, 1.45)                | 0.750        |                     |
|             | BOOST NZ       | 8 (6.5)                        | 124         | 8 (6.5)                         | 124         | 1.00 (0.39, 2.58)                | 1.000        |                     |
|             | BOOST II UK    | 40 (11.6)                      | 344         | 23 (6.6)                        | 348         | 1.76 (1.08, 2.87)                | 0.024        |                     |
|             | BOOST II AUS   | 26 (6.1)                       | 429         | 17 (3.9)                        | 431         | 1.54 (0.85, 2.79)                | 0.158        |                     |
|             | <b>NeOProM</b> | <b>194 (10.9)</b>              | <b>1778</b> | <b>158 (8.8)</b>                | <b>1797</b> | <b>1.24 (1.02, 1.51)</b>         | <b>0.032</b> |                     |
| Multiple    | SUPPORT        | 17 (10.9)                      | 156         | 22 (12.9)                       | 171         | 0.84 (0.43, 1.67)                | 0.625        |                     |
|             | COT            | 33 (16.0)                      | 206         | 29 (15.9)                       | 182         | 1.02 (0.67, 1.56)                | 0.922        |                     |
|             | BOOST NZ       | 4 (8.7)                        | 46          | 3 (6.5)                         | 46          | 1.27 (0.58, 2.80)                | 0.553        |                     |
|             | BOOST II UK    | 22 (15.9)                      | 138         | 22 (16.3)                       | 135         | 0.97 (0.59, 1.62)                | 0.919        |                     |
|             | BOOST II AUS   | 11 (8.0)                       | 138         | 6 (4.5)                         | 133         | 2.72 (1.21, 6.11)                | 0.015        |                     |
|             | <b>NeOProM</b> | <b>87 (12.7)</b>               | <b>684</b>  | <b>82 (12.3)</b>                | <b>667</b>  | <b>1.06 (0.81, 1.38)</b>         | <b>0.679</b> |                     |
| start<6 hrs | SUPPORT        | 71 (11.3)                      | 629         | 67 (10.5)                       | 637         | 1.09 (0.79, 1.52)                | 0.586        | 0.593               |
|             | COT            | 4 (14.8)                       | 27          | 5 (19.2)                        | 26          | 0.77 (0.23, 2.64)                | 0.679        |                     |
|             | BOOST NZ       | 2 (7.1)                        | 28          | 0                               | 28          |                                  | ***          |                     |
|             | BOOST II UK    |                                | .           |                                 | .           |                                  | .            |                     |
|             | BOOST II AUS   | 2 (3.4)                        | 59          | 4 (6.7)                         | 60          | 0.51 (0.10, 2.62)                | 0.423        |                     |
|             | <b>NeOProM</b> | <b>79 (10.6)</b>               | <b>743</b>  | <b>76 (10.1)</b>                | <b>751</b>  | <b>1.06 (0.78, 1.43)</b>         | <b>0.726</b> |                     |
| >=6 hrs     | SUPPORT        | 1 (20.0)                       | 5           | 0                               | 5           |                                  | ***          |                     |
|             | COT            | 93 (16.2)                      | 575         | 88 (15.4)                       | 573         | 1.05 (0.81, 1.36)                | 0.701        |                     |
|             | BOOST NZ       | 10 (7.0)                       | 142         | 11 (7.8)                        | 141         | 0.91 (0.45, 1.85)                | 0.791        |                     |



**eTable 25. Patent ductus arteriosus (PDA) surgically treated, by subgroups (continued)**

|           |                | Lower Oxygen Saturation Target |             | Higher Oxygen Saturation Target |             | Adjusted* Relative Risk (95% CI) |              |                     |
|-----------|----------------|--------------------------------|-------------|---------------------------------|-------------|----------------------------------|--------------|---------------------|
| Subgroup  | Trial          | n (%)                          | N           | n (%)                           | N           | Adjusted RR                      | p-value      | interaction p-value |
|           | BOOST II UK    |                                | .           |                                 | .           |                                  | .            |                     |
|           | BOOST II AUS   | 35 (6.9)                       | 506         | 19 (3.8)                        | 503         | 2.55 (1.40, 4.64)                | 0.002        |                     |
|           | <b>NeOProM</b> | <b>139 (11.3)</b>              | <b>1228</b> | <b>118 (9.7)</b>                | <b>1222</b> | <b>1.18 (0.94, 1.47)</b>         | <b>0.148</b> |                     |
| Original  | SUPPORT        | 73 (11.4)                      | 641         | 68 (10.5)                       | 648         | 1.11 (0.80, 1.53)                | 0.535        | 0.780               |
| software  | COT            | 48 (16.8)                      | 286         | 47 (16.9)                       | 278         | 0.99 (0.68, 1.44)                | 0.969        |                     |
|           | BOOST NZ       | 12 (7.1)                       | 170         | 11 (6.5)                        | 170         | 1.08 (0.54, 2.14)                | 0.834        |                     |
|           | BOOST II UK    | 12 (10.6)                      | 113         | 7 (6.1)                         | 114         | 1.73 (0.70, 4.26)                | 0.231        |                     |
|           | BOOST II AUS   | 20 (5.8)                       | 346         | 10 (2.9)                        | 344         | 1.99 (0.95, 4.18)                | 0.069        |                     |
|           | <b>NeOProM</b> | <b>165 (10.6)</b>              | <b>1556</b> | <b>143 (9.2)</b>                | <b>1554</b> | <b>1.15 (0.93, 1.42)</b>         | <b>0.202</b> |                     |
| Revised   | SUPPORT        |                                | .           |                                 | .           |                                  | .            |                     |
| software  | COT            | 41 (14.4)                      | 284         | 38 (13.6)                       | 279         | 1.05 (0.73, 1.52)                | 0.782        |                     |
|           | BOOST NZ       |                                | .           |                                 | .           |                                  | .            |                     |
|           | BOOST II UK    | 50 (13.6)                      | 369         | 38 (10.3)                       | 369         | 1.29 (0.85, 1.95)                | 0.225        |                     |
|           | BOOST II AUS   | 17 (7.7)                       | 221         | 13 (5.9)                        | 220         | 3.98 (0.90, 17.6)                | 0.068        |                     |
|           | <b>NeOProM</b> | <b>108 (12.4)</b>              | <b>874</b>  | <b>89 (10.3)</b>                | <b>868</b>  | <b>1.21 (0.93, 1.57)</b>         | <b>0.152</b> |                     |
| SGA:      | SUPPORT        | 70 (11.7)                      | 600         | 64 (10.7)                       | 597         | 1.11 (0.80, 1.55)                | 0.537        | 0.761               |
| Trialist  | COT            | 89 (16.2)                      | 548         | 87 (15.9)                       | 548         | 1.01 (0.78, 1.32)                | 0.914        |                     |
| defined - | BOOST II NZ    | 10 (6.5)                       | 153         | 10 (6.4)                        | 157         | 1.03 (0.50, 2.13)                | 0.931        |                     |
| No        | BOOST II UK    | 56 (13.8)                      | 406         | 40 (9.8)                        | 408         | 1.39 (0.94, 2.06)                | 0.100        |                     |
|           | BOOST II AUS   | 34 (7.0)                       | 487         | 20 (4.1)                        | 486         | 2.43 (1.31, 4.51)                | 0.005        |                     |
|           | <b>NeOProM</b> | <b>259 (11.8)</b>              | <b>2194</b> | <b>221 (10.1)</b>               | <b>2196</b> | <b>1.17 (0.99, 1.39)</b>         | <b>0.066</b> |                     |
| Yes       | SUPPORT        | 3 (7.3)                        | 41          | 4 (7.8)                         | 51          | 0.93 (0.22, 3.93)                | 0.921        |                     |
|           | COT            | 8 (14.8)                       | 54          | 6 (11.8)                        | 51          | 0.97 (0.67, 1.41)                | 0.865        |                     |
|           | BOOST II NZ    | 2 (11.8)                       | 17          | 1 (7.7)                         | 13          | 1.51 (0.15, 15.0)                | 0.724        |                     |
|           | BOOST II UK    | 6 (8.1)                        | 74          | 4 (5.6)                         | 72          |                                  | ***          |                     |
|           | BOOST II AUS   | 3 (3.8)                        | 80          | 3 (3.8)                         | 78          | 0.98 (0.20, 4.67)                | 0.975        |                     |
|           | <b>NeOProM</b> | <b>22 (8.3)</b>                | <b>266</b>  | <b>18 (6.8)</b>                 | <b>265</b>  | <b>1.10 (0.67, 1.80)</b>         | <b>0.714</b> |                     |
| SGA:      | SUPPORT        | 63 (11.5)                      | 549         | 57 (10.6)                       | 537         | 1.11 (0.78, 1.58)                | 0.567        | 0.711               |
| NeOProM   | COT            | 89 (16.2)                      | 548         | 87 (15.9)                       | 548         | 1.01 (0.78, 1.32)                | 0.914        |                     |
| defined - | BOOST II NZ    | 10 (6.5)                       | 153         | 10 (6.4)                        | 157         | 1.03 (0.50, 2.13)                | 0.931        |                     |
| No        | BOOST II UK    | 56 (13.1)                      | 426         | 42 (9.8)                        | 427         | 1.33 (0.90, 1.96)                | 0.159        |                     |
|           | BOOST II AUS   | 34 (7.0)                       | 487         | 20 (4.1)                        | 486         | 2.43 (1.31, 4.51)                | 0.005        |                     |
|           | <b>NeOProM</b> | <b>252 (11.7)</b>              | <b>2163</b> | <b>216 (10.0)</b>               | <b>2155</b> | <b>1.16 (0.98, 1.38)</b>         | <b>0.085</b> |                     |
| Yes       | SUPPORT        | 10 (10.9)                      | 92          | 11 (9.9)                        | 111         | 1.09 (0.49, 2.46)                | 0.829        |                     |
|           | COT            | 8 (14.8)                       | 54          | 6 (11.8)                        | 51          | 0.97 (0.67, 1.41)                | 0.865        |                     |
|           | BOOST II NZ    | 2 (11.8)                       | 17          | 1 (7.7)                         | 13          | 1.51 (0.15, 15.0)                | 0.724        |                     |
|           | BOOST II UK    | 6 (10.7)                       | 56          | 3 (5.4)                         | 56          | 1.90 (0.52, 6.93)                | 0.330        |                     |
|           | BOOST II AUS   | 3 (3.8)                        | 80          | 3 (3.8)                         | 78          | 0.98 (0.20, 4.67)                | 0.975        |                     |
|           | <b>NeOProM</b> | <b>29 (9.7)</b>                | <b>299</b>  | <b>24 (7.8)</b>                 | <b>309</b>  | <b>1.22 (0.74, 2.03)</b>         | <b>0.435</b> |                     |

\* Analysis adjusted for trials and multiple births

## Abbreviations/definitions

CI: confidence interval; RR: relative risk; GA: gestational age; SUPPORT: Surfactant Positive Airway Pressure and Pulse Oximetry Trial; COT: Canadian Oxygen Trial; BOOST: Benefits of Oxygen Saturation Targeting; NZ: New Zealand; UK: United Kingdom; AUS: Australia; NeOProM: Neonatal Oxygenation Prospective Meta-analysis; inborn: born inside the treating center; outborn: born outside the treating center (e.g. transferred from another hospital); vaginal: mode of delivery through the vagina; Caesarean: mode of delivery via surgical procedure; ANS: antenatal corticosteroids; singleton: child born as a single birth; multiple: more than one child per birth; start<6 hrs: intervention commenced less than 6 hours after birth; start>=6 hrs: intervention commenced greater than or equal to 6 hours after birth; original software: original oximeter software; revised software: revised oximeter software; SGA: small for gestational age; SGA NeOProM defined: small for gestational age as per definition used by NeOProM collaboration, i.e. less than 10th percentile using charts from Kramer et al.<sup>1</sup>

The subgroup analysis by oximeter software type (original vs revised) excludes n=74 infants in COT who were exposed to both the original and revised software.

Empty cells (.) indicate data not collected or not applicable in this trial.

\*\*\* Low / no event rate(s) makes parameter not estimable.

eTable 26. Severe necrotizing enterocolitis (NEC), by subgroups

|           |                | Lower Oxygen Saturation Target |             | Higher Oxygen Saturation Target |             | Adjusted* Relative Risk (95% CI) |                 |                     |
|-----------|----------------|--------------------------------|-------------|---------------------------------|-------------|----------------------------------|-----------------|---------------------|
| Subgroup  | Trial          | n (%)                          | N           | n (%)                           | N           | Adjusted RR                      | p-value         | interaction p-value |
| GA<26 wks | SUPPORT        | 31 (11.5)                      | 269         | 21 (7.6)                        | 278         | 1.54 (0.90, 2.65)                | 0.116           | 0.741               |
|           | COT            | 26 (10.0)                      | 260         | 24 (9.5)                        | 252         | 1.05 (0.62, 1.78)                | 0.855           |                     |
|           | BOOST NZ       | 7 (9.7)                        | 72          | 6 (8.3)                         | 72          | 1.18 (0.42, 3.33)                | 0.759           |                     |
|           | BOOST II UK    | 36 (16.8)                      | 214         | 28 (13.2)                       | 212         | 1.30 (0.82, 2.06)                | 0.268           |                     |
|           | BOOST II AUS   | 29 (12.0)                      | 241         | 20 (8.3)                        | 240         | 1.44 (0.84, 2.48)                | 0.184           |                     |
|           | <b>NeOProM</b> | <b>129 (12.2)</b>              | <b>1056</b> | <b>99 (9.4)</b>                 | <b>1054</b> | <b>1.30 (1.01, 1.66)</b>         | <b>0.040</b>    |                     |
| GA≥26 wks | SUPPORT        | 20 (5.4)                       | 372         | 16 (4.3)                        | 371         | 1.24 (0.66, 2.35)                | 0.504           |                     |
|           | COT            | 23 (6.7)                       | 342         | 12 (3.5)                        | 347         | 1.88 (0.96, 3.70)                | 0.065           |                     |
|           | BOOST NZ       | 8 (8.2)                        | 98          | 6 (6.1)                         | 98          | 1.36 (0.49, 3.73)                | 0.553           |                     |
|           | BOOST II UK    | 35 (13.0)                      | 270         | 24 (9.0)                        | 268         | 1.45 (0.89, 2.35)                | 0.133           |                     |
|           | BOOST II AUS   | 12 (3.7)                       | 326         | 13 (4.0)                        | 327         | 0.95 (0.43, 2.10)                | 0.891           |                     |
|           | <b>NeOProM</b> | <b>98 (7.0)</b>                | <b>1408</b> | <b>71 (5.0)</b>                 | <b>1411</b> | <b>1.37 (1.02, 1.84)</b>         | <b>0.036</b>    |                     |
| Inborn    | SUPPORT        | 51 (8.0)                       | 641         | 37 (5.7)                        | 649         | 1.41 (0.93, 2.13)                | 0.107           | 0.015               |
|           | COT            | 44 (7.8)                       | 562         | 30 (5.5)                        | 543         | 1.42 (0.91, 2.21)                | 0.125           |                     |
|           | BOOST NZ       | 15 (9.4)                       | 159         | 11 (7.0)                        | 157         | 1.37 (0.65, 2.91)                | 0.406           |                     |
|           | BOOST II UK    | 64 (15.0)                      | 427         | 39 (9.3)                        | 421         | 1.63 (1.12, 2.36)                | 0.010           |                     |
|           | BOOST II AUS   | 39 (7.5)                       | 523         | 29 (5.5)                        | 525         | 1.37 (0.86, 2.19)                | 0.181           |                     |
|           | <b>NeOProM</b> | <b>213 (9.2)</b>               | <b>2312</b> | <b>146 (6.4)</b>                | <b>2295</b> | <b>1.44 (1.18, 1.77)</b>         | <b>&lt;.001</b> |                     |
| Outborn   | SUPPORT        | .                              | .           | .                               | .           | .                                | .               |                     |
|           | COT            | 5 (12.5)                       | 40          | 6 (10.7)                        | 56          | 1.17 (0.38, 3.62)                | 0.784           |                     |
|           | BOOST NZ       | 0                              | 11          | 1 (7.7)                         | 13          |                                  | ***             |                     |
|           | BOOST II UK    | 7 (12.3)                       | 57          | 13 (22.0)                       | 59          | 0.58 (0.25, 1.34)                | 0.200           |                     |
|           | BOOST II AUS   | 2 (4.5)                        | 44          | 4 (9.5)                         | 42          | 0.51 (0.10, 2.51)                | 0.405           |                     |
|           | <b>NeOProM</b> | <b>14 (9.2)</b>                | <b>152</b>  | <b>24 (14.1)</b>                | <b>170</b>  | <b>0.67 (0.36, 1.25)</b>         | <b>0.211</b>    |                     |
| Vaginal   | SUPPORT        | 20 (9.4)                       | 212         | 12 (5.5)                        | 217         | 1.65 (0.82, 3.32)                | 0.161           | 0.439               |
|           | COT            | 19 (8.6)                       | 222         | 16 (6.6)                        | 243         | 1.30 (0.68, 2.47)                | 0.422           |                     |
|           | BOOST NZ       | 3 (4.0)                        | 75          | 4 (5.1)                         | 79          | 0.79 (0.19, 3.32)                | 0.745           |                     |
|           | BOOST II UK    | 49 (16.8)                      | 291         | 35 (11.8)                       | 296         | 1.42 (0.95, 2.13)                | 0.086           |                     |
|           | BOOST II AUS   | 25 (9.2)                       | 272         | 15 (5.8)                        | 257         | 1.57 (0.85, 2.92)                | 0.149           |                     |
|           | <b>NeOProM</b> | <b>116 (10.8)</b>              | <b>1072</b> | <b>82 (7.5)</b>                 | <b>1092</b> | <b>1.43 (1.10, 1.88)</b>         | <b>0.009</b>    |                     |
| Caesarean | SUPPORT        | 31 (7.2)                       | 429         | 25 (5.8)                        | 432         | 1.26 (0.75, 2.12)                | 0.374           |                     |
|           | COT            | 30 (8.0)                       | 377         | 20 (5.6)                        | 355         | 1.41 (0.82, 2.41)                | 0.212           |                     |
|           | BOOST NZ       | 12 (12.6)                      | 95          | 8 (8.8)                         | 91          | 1.48 (0.63, 3.47)                | 0.363           |                     |
|           | BOOST II UK    | 22 (11.4)                      | 193         | 17 (9.2)                        | 184         | 1.28 (0.72, 2.29)                | 0.398           |                     |
|           | BOOST II AUS   | 16 (5.4)                       | 294         | 18 (5.9)                        | 306         | 0.97 (0.50, 1.90)                | 0.930           |                     |
|           | <b>NeOProM</b> | <b>111 (8.0)</b>               | <b>1388</b> | <b>88 (6.4)</b>                 | <b>1368</b> | <b>1.24 (0.94, 1.62)</b>         | <b>0.125</b>    |                     |
| ANS - No  | SUPPORT        | 3 (14.3)                       | 21          | 0                               | 29          |                                  | ***             | 0.242               |
|           | COT            | 10 (14.3)                      | 70          | 5 (8.2)                         | 61          | 1.72 (0.62, 4.73)                | 0.297           |                     |
|           | BOOST NZ       | 1 (5.0)                        | 20          | 0                               | 18          |                                  | ***             |                     |
|           | BOOST II UK    | 6 (15.0)                       | 40          | 5 (10.6)                        | 47          | 1.41 (0.46, 4.32)                | 0.542           |                     |

eTable 26. Severe necrotizing enterocolitis (NEC), by subgroups (continued)

|             |                | Lower Oxygen Saturation Target |             | Higher Oxygen Saturation Target |             | Adjusted* Relative Risk (95% CI) |                 |                     |
|-------------|----------------|--------------------------------|-------------|---------------------------------|-------------|----------------------------------|-----------------|---------------------|
| Subgroup    | Trial          | n (%)                          | N           | n (%)                           | N           | Adjusted RR                      | p-value         | interaction p-value |
|             | BOOST II AUS   | 6 (9.4)                        | 64          | 3 (7.1)                         | 42          | 1.33 (0.35, 5.12)                | 0.676           |                     |
|             | <b>NeOProM</b> | <b>26 (12.1)</b>               | <b>215</b>  | <b>13 (6.6)</b>                 | <b>197</b>  | <b>1.85 (0.96, 3.54)</b>         | <b>0.065</b>    |                     |
| ANS - Yes   | SUPPORT        | 48 (7.7)                       | 620         | 37 (6.0)                        | 619         | 1.30 (0.86, 1.99)                | 0.215           |                     |
|             | COT            | 39 (7.4)                       | 530         | 31 (5.8)                        | 536         | 1.27 (0.81, 1.99)                | 0.299           |                     |
|             | BOOST NZ       | 14 (9.3)                       | 150         | 12 (7.9)                        | 152         | 1.21 (0.58, 2.53)                | 0.617           |                     |
|             | BOOST II UK    | 64 (14.5)                      | 442         | 46 (10.7)                       | 431         | 1.38 (0.97, 1.96)                | 0.075           |                     |
|             | BOOST II AUS   | 35 (7.0)                       | 501         | 30 (5.8)                        | 519         | 1.22 (0.76, 1.97)                | 0.404           |                     |
|             | <b>NeOProM</b> | <b>200 (8.9)</b>               | <b>2243</b> | <b>156 (6.9)</b>                | <b>2257</b> | <b>1.28 (1.05, 1.56)</b>         | <b>0.016</b>    |                     |
| Male        | SUPPORT        | 28 (8.4)                       | 333         | 22 (6.0)                        | 366         | 1.39 (0.81, 2.38)                | 0.227           | 0.384               |
|             | COT            | 26 (7.9)                       | 329         | 20 (6.1)                        | 326         | 1.29 (0.73, 2.25)                | 0.380           |                     |
|             | BOOST NZ       | 11 (12.2)                      | 90          | 7 (7.8)                         | 90          | 1.62 (0.66, 3.99)                | 0.295           |                     |
|             | BOOST II UK    | 48 (18.7)                      | 257         | 30 (11.8)                       | 254         | 1.58 (1.04, 2.39)                | 0.032           |                     |
|             | BOOST II AUS   | 27 (9.2)                       | 293         | 21 (7.1)                        | 296         | 1.32 (0.76, 2.32)                | 0.327           |                     |
|             | <b>NeOProM</b> | <b>140 (10.8)</b>              | <b>1302</b> | <b>100 (7.5)</b>                | <b>1332</b> | <b>1.43 (1.12, 1.82)</b>         | <b>0.004</b>    |                     |
| Female      | SUPPORT        | 23 (7.5)                       | 308         | 15 (5.3)                        | 283         | 1.39 (0.73, 2.63)                | 0.314           |                     |
|             | COT            | 23 (8.4)                       | 273         | 16 (5.9)                        | 273         | 1.41 (0.77, 2.61)                | 0.267           |                     |
|             | BOOST NZ       | 4 (5.0)                        | 80          | 5 (6.3)                         | 80          | 0.80 (0.22, 2.88)                | 0.728           |                     |
|             | BOOST II UK    | 23 (10.1)                      | 227         | 22 (9.7)                        | 226         | 1.04 (0.60, 1.80)                | 0.891           |                     |
|             | BOOST II AUS   | 14 (5.1)                       | 274         | 12 (4.4)                        | 271         | 1.15 (0.54, 2.45)                | 0.709           |                     |
|             | <b>NeOProM</b> | <b>87 (7.5)</b>                | <b>1162</b> | <b>70 (6.2)</b>                 | <b>1133</b> | <b>1.20 (0.88, 1.62)</b>         | <b>0.243</b>    |                     |
| Singleton   | SUPPORT        | 40 (8.2)                       | 485         | 25 (5.2)                        | 477         | 1.57 (0.97, 2.55)                | 0.066           | 0.034               |
|             | COT            | 36 (9.1)                       | 396         | 23 (5.5)                        | 417         | 1.65 (0.99, 2.73)                | 0.052           |                     |
|             | BOOST NZ       | 11 (8.9)                       | 124         | 9 (7.3)                         | 124         | 1.22 (0.52, 2.85)                | 0.642           |                     |
|             | BOOST II UK    | 57 (16.5)                      | 346         | 36 (10.4)                       | 345         | 1.58 (1.07, 2.33)                | 0.022           |                     |
|             | BOOST II AUS   | 34 (7.9)                       | 429         | 26 (6.0)                        | 432         | 1.32 (0.80, 2.16)                | 0.274           |                     |
|             | <b>NeOProM</b> | <b>178 (10.0)</b>              | <b>1780</b> | <b>119 (6.6)</b>                | <b>1795</b> | <b>1.51 (1.21, 1.88)</b>         | <b>&lt;.001</b> |                     |
| Multiple    | SUPPORT        | 11 (7.1)                       | 156         | 12 (7.0)                        | 172         | 1.00 (0.44, 2.31)                | 0.993           |                     |
|             | COT            | 13 (6.3)                       | 206         | 13 (7.1)                        | 182         | 0.88 (0.43, 1.82)                | 0.737           |                     |
|             | BOOST NZ       | 4 (8.7)                        | 46          | 3 (6.5)                         | 46          | 1.44 (0.33, 6.22)                | 0.623           |                     |
|             | BOOST II UK    | 14 (10.1)                      | 138         | 16 (11.9)                       | 135         | 0.88 (0.46, 1.67)                | 0.691           |                     |
|             | BOOST II AUS   | 7 (5.1)                        | 138         | 7 (5.2)                         | 135         | 1.02 (0.35, 3.01)                | 0.965           |                     |
|             | <b>NeOProM</b> | <b>49 (7.2)</b>                | <b>684</b>  | <b>51 (7.6)</b>                 | <b>670</b>  | <b>0.93 (0.64, 1.36)</b>         | <b>0.712</b>    |                     |
| start<6 hrs | SUPPORT        | 51 (8.1)                       | 629         | 37 (5.8)                        | 638         | 1.41 (0.93, 2.13)                | 0.105           | 0.792               |
|             | COT            | 0                              | 27          | 1 (3.8)                         | 26          |                                  | ***             |                     |
|             | BOOST NZ       | 1 (3.6)                        | 28          | 0                               | 28          |                                  | ***             |                     |
|             | BOOST II UK    |                                | .           |                                 | .           |                                  | .               |                     |
|             | BOOST II AUS   | 2 (3.4)                        | 59          | 1 (1.7)                         | 60          | 2.21 (0.23, 21.0)                | 0.492           |                     |
|             | <b>NeOProM</b> | <b>54 (7.3)</b>                | <b>743</b>  | <b>39 (5.2)</b>                 | <b>752</b>  | <b>1.41 (0.94, 2.11)</b>         | <b>0.097</b>    |                     |
| >=6 hrs     | SUPPORT        | 0                              | 5           | 0                               | 5           |                                  | ***             |                     |
|             | COT            | 49 (8.5)                       | 575         | 35 (6.1)                        | 573         | 1.40 (0.92, 2.14)                | 0.113           |                     |
|             | BOOST NZ       | 14 (9.9)                       | 142         | 11 (7.8)                        | 141         | 1.28 (0.60, 2.73)                | 0.519           |                     |

eTable 26. Severe necrotizing enterocolitis (NEC), by subgroups (continued)

|           |                | Lower Oxygen Saturation Target |             | Higher Oxygen Saturation Target |             | Adjusted* Relative Risk (95% CI) |              |                     |
|-----------|----------------|--------------------------------|-------------|---------------------------------|-------------|----------------------------------|--------------|---------------------|
| Subgroup  | Trial          | n (%)                          | N           | n (%)                           | N           | Adjusted RR                      | p-value      | interaction p-value |
|           | BOOST II UK    |                                | .           |                                 | .           |                                  | .            |                     |
|           | BOOST II AUS   | 39 (7.7)                       | 506         | 32 (6.3)                        | 506         | 1.23 (0.78, 1.94)                | 0.368        |                     |
|           | <b>NeOProM</b> | <b>102 (8.3)</b>               | <b>1228</b> | <b>78 (6.4)</b>                 | <b>1225</b> | <b>1.30 (0.98, 1.73)</b>         | <b>0.071</b> |                     |
| Original  | SUPPORT        | 51 (8.0)                       | 641         | 37 (5.7)                        | 649         | 1.41 (0.93, 2.13)                | 0.107        | 0.672               |
| software  | COT            | 22 (7.7)                       | 286         | 15 (5.4)                        | 278         | 1.41 (0.75, 2.66)                | 0.281        |                     |
|           | BOOST NZ       | 15 (8.8)                       | 170         | 12 (7.1)                        | 170         | 1.27 (0.61, 2.65)                | 0.516        |                     |
|           | BOOST II UK    | 17 (15.0)                      | 113         | 11 (9.6)                        | 114         | 1.52 (0.75, 3.07)                | 0.242        |                     |
|           | BOOST II AUS   | 23 (6.6)                       | 346         | 16 (4.6)                        | 346         | 1.44 (0.77, 2.68)                | 0.252        |                     |
|           | <b>NeOProM</b> | <b>128 (8.2)</b>               | <b>1556</b> | <b>91 (5.8)</b>                 | <b>1557</b> | <b>1.40 (1.08, 1.82)</b>         | <b>0.010</b> |                     |
| Revised   | SUPPORT        |                                | .           |                                 | .           |                                  | .            |                     |
| software  | COT            | 24 (8.5)                       | 284         | 15 (5.4)                        | 279         | 1.59 (0.85, 2.97)                | 0.149        |                     |
|           | BOOST NZ       |                                | .           |                                 | .           |                                  | .            |                     |
|           | BOOST II UK    | 54 (14.6)                      | 371         | 41 (11.2)                       | 366         | 1.34 (0.92, 1.96)                | 0.123        |                     |
|           | BOOST II AUS   | 18 (8.1)                       | 221         | 17 (7.7)                        | 221         | 1.13 (0.59, 2.17)                | 0.712        |                     |
|           | <b>NeOProM</b> | <b>96 (11.0)</b>               | <b>876</b>  | <b>73 (8.4)</b>                 | <b>866</b>  | <b>1.30 (0.97, 1.74)</b>         | <b>0.074</b> |                     |
| SGA:      | SUPPORT        | 46 (7.7)                       | 600         | 35 (5.9)                        | 598         | 1.32 (0.85, 2.03)                | 0.213        | 0.098               |
| Trialist  | COT            | 47 (8.6)                       | 548         | 34 (6.2)                        | 548         | 1.39 (0.91, 2.13)                | 0.132        |                     |
| defined - | BOOST II NZ    | 12 (7.8)                       | 153         | 11 (7.0)                        | 157         | 1.14 (0.52, 2.50)                | 0.747        |                     |
| No        | BOOST II UK    | 58 (14.3)                      | 407         | 48 (11.9)                       | 405         | 1.21 (0.85, 1.73)                | 0.299        |                     |
|           | BOOST II AUS   | 34 (7.0)                       | 487         | 28 (5.7)                        | 489         | 1.24 (0.76, 2.01)                | 0.390        |                     |
|           | <b>NeOProM</b> | <b>197 (9.0)</b>               | <b>2195</b> | <b>156 (7.1)</b>                | <b>2197</b> | <b>1.26 (1.03, 1.54)</b>         | <b>0.025</b> |                     |
| Yes       | SUPPORT        | 5 (12.2)                       | 41          | 2 (3.9)                         | 51          | 3.11 (0.63, 15.2)                | 0.162        |                     |
|           | COT            | 2 (3.7)                        | 54          | 2 (3.9)                         | 51          | 0.94 (0.14, 6.41)                | 0.953        |                     |
|           | BOOST II NZ    | 3 (17.6)                       | 17          | 1 (7.7)                         | 13          | 2.27 (0.26, 19.5)                | 0.456        |                     |
|           | BOOST II UK    | 13 (17.3)                      | 75          | 4 (5.6)                         | 72          | 3.12 (1.07, 9.12)                | 0.018        |                     |
|           | BOOST II AUS   | 7 (8.8)                        | 80          | 5 (6.4)                         | 78          | 1.43 (0.53, 3.92)                | 0.481        |                     |
|           | <b>NeOProM</b> | <b>30 (11.2)</b>               | <b>267</b>  | <b>14 (5.3)</b>                 | <b>265</b>  | <b>2.11 (1.15, 3.87)</b>         | <b>0.02</b>  |                     |
| SGA:      | SUPPORT        | 42 (7.7)                       | 549         | 29 (5.4)                        | 538         | 1.42 (0.89, 2.26)                | 0.143        | 0.410               |
| NeOProM   | COT            | 47 (8.6)                       | 548         | 34 (6.2)                        | 548         | 1.39 (0.91, 2.13)                | 0.132        |                     |
| defined - | BOOST II NZ    | 12 (7.8)                       | 153         | 11 (7.0)                        | 157         | 1.14 (0.52, 2.50)                | 0.747        |                     |
| No        | BOOST II UK    | 63 (14.8)                      | 427         | 50 (11.8)                       | 424         | 1.27 (0.90, 1.79)                | 0.180        |                     |
|           | BOOST II AUS   | 34 (7.0)                       | 487         | 28 (5.7)                        | 489         | 1.24 (0.76, 2.01)                | 0.390        |                     |
|           | <b>NeOProM</b> | <b>198 (9.1)</b>               | <b>2164</b> | <b>152 (7.1)</b>                | <b>2156</b> | <b>1.29 (1.06, 1.59)</b>         | <b>0.013</b> |                     |
| Yes       | SUPPORT        | 9 (9.8)                        | 92          | 8 (7.2)                         | 111         | 1.24 (0.50, 3.08)                | 0.636        |                     |
|           | COT            | 2 (3.7)                        | 54          | 2 (3.9)                         | 51          | 0.94 (0.14, 6.41)                | 0.953        |                     |
|           | BOOST II NZ    | 3 (17.6)                       | 17          | 1 (7.7)                         | 13          | 2.27 (0.26, 19.5)                | 0.456        |                     |
|           | BOOST II UK    | 8 (14.0)                       | 57          | 2 (3.6)                         | 56          | 3.93 (0.87, 17.70)               | 0.368        |                     |
|           | BOOST II AUS   | 7 (8.8)                        | 80          | 5 (6.4)                         | 78          | 1.43 (0.53, 3.92)                | 0.481        |                     |
|           | <b>NeOProM</b> | <b>29 (9.7)</b>                | <b>300</b>  | <b>18 (5.8)</b>                 | <b>309</b>  | <b>1.67 (0.96, 2.92)</b>         | <b>0.070</b> |                     |

\* Analysis adjusted for trials and multiple births

## Abbreviations/definitions

CI: confidence interval; RR: relative risk; GA: gestational age; SUPPORT: Surfactant Positive Airway Pressure and Pulse Oximetry Trial; COT: Canadian Oxygen Trial; BOOST: Benefits of Oxygen Saturation Targeting; NZ: New Zealand; UK: United Kingdom; AUS: Australia; NeOProM: Neonatal Oxygenation Prospective Meta-analysis; inborn: born inside the treating center; outborn: born outside the treating center (e.g. transferred from another hospital); vaginal: mode of delivery through the vagina; Caesarean: mode of delivery via surgical procedure; ANS: antenatal corticosteroids; singleton: child born as a single birth; multiple: more than one child per birth; start<6 hrs: intervention commenced less than 6 hours after birth; start>=6 hrs: intervention commenced greater than or equal to 6 hours after birth; original software: original oximeter software; revised software: revised oximeter software; SGA: small for gestational age; SGA NeOProM defined: small for gestational age as per definition used by NeOProM collaboration, i.e. less than 10th percentile using charts from Kramer et al.<sup>1</sup>

The subgroup analysis by oximeter software type (original vs revised) excludes n=74 infants in COT who were exposed to both the original and revised software.

Empty cells (.) indicate data not collected or not applicable in this trial.

\*\*\* Low / no event rate(s) makes parameter not estimable.

eTable 27. Treated retinopathy of prematurity (ROP), by subgroups

|           |                | Lower Oxygen Saturation Target |             | Higher Oxygen Saturation Target |             | Adjusted* Relative Risk (95% CI) |                 |                     |
|-----------|----------------|--------------------------------|-------------|---------------------------------|-------------|----------------------------------|-----------------|---------------------|
| Subgroup  | Trial          | n (%)                          | N           | n (%)                           | N           | Adjusted RR                      | p-value         | interaction p-value |
| GA<26 wks | SUPPORT        | 29 (16.6)                      | 175         | 67 (33.3)                       | 201         | 0.47 (0.32, 0.71)                | <.001           | 0.883               |
|           | COT            | 47 (23.7)                      | 198         | 50 (26.0)                       | 192         | 0.85 (0.61, 1.17)                | 0.324           |                     |
|           | BOOST NZ       | 11 (17.7)                      | 62          | 8 (12.7)                        | 63          | 1.27 (0.60, 2.69)                | 0.527           |                     |
|           | BOOST II UK    | 49 (33.6)                      | 146         | 66 (42.3)                       | 156         | 0.80 (0.59, 1.07)                | 0.129           |                     |
|           | BOOST II AUS   | 22 (12.3)                      | 179         | 33 (17.1)                       | 193         | 0.72 (0.43, 1.18)                | 0.193           |                     |
|           | <b>NeOProM</b> | <b>158 (20.8)</b>              | <b>760</b>  | <b>224 (27.8)</b>               | <b>805</b>  | <b>0.74 (0.62, 0.87)</b>         | <b>&lt;.001</b> |                     |
| GA≥26 wks | SUPPORT        | 7 (2.3)                        | 307         | 26 (8.3)                        | 313         | 0.28 (0.12, 0.63)                | 0.002           |                     |
|           | COT            | 17 (5.6)                       | 302         | 16 (5.1)                        | 311         | 0.96 (0.49, 1.87)                | 0.893           |                     |
|           | BOOST NZ       | 3 (3.1)                        | 96          | 5 (5.7)                         | 87          | 0.35 (0.01, 15.9)                | 0.593           |                     |
|           | BOOST II UK    | 20 (8.1)                       | 247         | 22 (9.0)                        | 245         | 0.93 (0.52, 1.65)                | 0.794           |                     |
|           | BOOST II AUS   | 15 (4.9)                       | 308         | 15 (4.9)                        | 304         | 0.98 (0.49, 1.98)                | 0.965           |                     |
|           | <b>NeOProM</b> | <b>62 (4.9)</b>                | <b>1260</b> | <b>84 (6.7)</b>                 | <b>1260</b> | <b>0.76 (0.55, 1.04)</b>         | <b>0.087</b>    |                     |
| Inborn    | SUPPORT        | 36 (7.5)                       | 482         | 93 (18.1)                       | 514         | 0.41 (0.28, 0.60)                | <.001           | 0.994               |
|           | COT            | 59 (12.6)                      | 468         | 56 (12.1)                       | 461         | 0.95 (0.69, 1.32)                | 0.766           |                     |
|           | BOOST NZ       | 13 (8.8)                       | 148         | 13 (9.3)                        | 140         | 0.82 (0.41, 1.63)                | 0.577           |                     |
|           | BOOST II UK    | 61 (17.6)                      | 347         | 79 (22.4)                       | 353         | 0.81 (0.60, 1.09)                | 0.162           |                     |
|           | BOOST II AUS   | 35 (7.7)                       | 452         | 45 (9.6)                        | 468         | 0.81 (0.53, 1.24)                | 0.331           |                     |
|           | <b>NeOProM</b> | <b>204 (10.8)</b>              | <b>1897</b> | <b>286 (14.8)</b>               | <b>1936</b> | <b>0.74 (0.62, 0.87)</b>         | <b>&lt;.001</b> |                     |
| Outborn   | SUPPORT        | .                              | .           | .                               | .           | .                                | .               |                     |
|           | COT            | 5 (15.6)                       | 32          | 10 (23.8)                       | 42          | 0.66 (0.25, 1.73)                | 0.459           |                     |
|           | BOOST NZ       | 1 (10.0)                       | 10          | 0                               | 10          |                                  | ***             |                     |
|           | BOOST II UK    | 8 (17.4)                       | 46          | 9 (18.8)                        | 48          | 0.94 (0.39, 2.24)                | 0.882           |                     |
|           | BOOST II AUS   | 2 (5.7)                        | 35          | 3 (10.3)                        | 29          | 0.62 (0.12, 3.11)                | 0.559           |                     |
|           | <b>NeOProM</b> | <b>16 (13.0)</b>               | <b>123</b>  | <b>22 (17.1)</b>                | <b>129</b>  | <b>0.78 (0.44, 1.40)</b>         | <b>0.412</b>    |                     |
| Vaginal   | SUPPORT        | 14 (8.9)                       | 158         | 22 (13.0)                       | 169         | 0.62 (0.32, 1.18)                | 0.146           | 0.010               |
|           | COT            | 26 (14.4)                      | 180         | 24 (11.9)                       | 202         | 1.22 (0.73, 2.03)                | 0.454           |                     |
|           | BOOST NZ       | 9 (13.8)                       | 65          | 6 (9.1)                         | 66          | 1.27 (0.77, 2.09)                | 0.352           |                     |
|           | BOOST II UK    | 51 (22.5)                      | 227         | 55 (23.2)                       | 237         | 0.98 (0.70, 1.38)                | 0.919           |                     |
|           | BOOST II AUS   | 16 (7.1)                       | 225         | 25 (11.4)                       | 220         | 0.63 (0.34, 1.14)                | 0.128           |                     |
|           | <b>NeOProM</b> | <b>116 (13.6)</b>              | <b>855</b>  | <b>132 (14.8)</b>               | <b>894</b>  | <b>0.92 (0.74, 1.16)</b>         | <b>0.484</b>    |                     |
| Caesarean | SUPPORT        | 22 (6.8)                       | 324         | 71 (20.6)                       | 345         | 0.34 (0.21, 0.54)                | <.001           |                     |
|           | COT            | 38 (11.9)                      | 319         | 42 (14.0)                       | 300         | 0.75 (0.51, 1.11)                | 0.146           |                     |
|           | BOOST NZ       | 5 (5.4)                        | 93          | 7 (8.3)                         | 84          | 0.51 (0.15, 1.72)                | 0.277           |                     |
|           | BOOST II UK    | 18 (10.8)                      | 166         | 33 (20.1)                       | 164         | 0.56 (0.33, 0.94)                | 0.030           |                     |
|           | BOOST II AUS   | 21 (8.0)                       | 261         | 23 (8.4)                        | 274         | 0.98 (0.55, 1.74)                | 0.946           |                     |
|           | <b>NeOProM</b> | <b>104 (8.9)</b>               | <b>1163</b> | <b>176 (15.1)</b>               | <b>1167</b> | <b>0.60 (0.48, 0.75)</b>         | <b>&lt;.001</b> |                     |
| ANS - No  | SUPPORT        | 0                              | 19          | 2 (8.7)                         | 23          |                                  | ***             | 0.165               |
|           | COT            | 4 (8.2)                        | 49          | 13 (27.7)                       | 47          | 0.29 (0.10, 0.83)                | 0.022           |                     |
|           | BOOST NZ       | 1 (5.9)                        | 17          | 0                               | 13          |                                  | ***             |                     |
|           | BOOST II UK    | 2 (6.7)                        | 30          | 5 (16.7)                        | 30          | 0.27 (0.05, 1.49)                | 0.134           |                     |

eTable 27. Treated retinopathy of prematurity (ROP), by subgroups (continued)

|             |                | Lower Oxygen Saturation Target |             | Higher Oxygen Saturation Target |             | Adjusted* Relative Risk (95% CI) |                 |                     |
|-------------|----------------|--------------------------------|-------------|---------------------------------|-------------|----------------------------------|-----------------|---------------------|
| Subgroup    | Trial          | n (%)                          | N           | n (%)                           | N           | Adjusted RR                      | p-value         | interaction p-value |
|             | BOOST II AUS   | 6 (11.5)                       | 52          | 4 (12.9)                        | 31          | 0.89 (0.27, 2.95)                | 0.853           |                     |
|             | <b>NeOProM</b> | <b>13 (7.8)</b>                | <b>167</b>  | <b>24 (16.7)</b>                | <b>144</b>  | <b>0.45 (0.24, 0.84)</b>         | <b>0.012</b>    |                     |
| ANS - Yes   | SUPPORT        | 36 (7.8)                       | 463         | 91 (18.5)                       | 491         | 0.42 (0.29, 0.61)                | <.001           |                     |
|             | COT            | 60 (13.3)                      | 450         | 53 (11.6)                       | 456         | 1.01 (0.73, 1.41)                | 0.945           |                     |
|             | BOOST NZ       | 13 (9.2)                       | 141         | 13 (9.5)                        | 137         | 0.85 (0.43, 1.68)                | 0.632           |                     |
|             | BOOST II UK    | 66 (18.3)                      | 361         | 83 (22.5)                       | 369         | 0.83 (0.62, 1.11)                | 0.204           |                     |
|             | BOOST II AUS   | 31 (7.2)                       | 433         | 44 (9.5)                        | 461         | 0.75 (0.48, 1.17)                | 0.210           |                     |
|             | <b>NeOProM</b> | <b>206 (11.1)</b>              | <b>1848</b> | <b>284 (14.8)</b>               | <b>1914</b> | <b>0.75 (0.64, 0.89)</b>         | <b>&lt;.001</b> |                     |
| Male        | SUPPORT        | 20 (8.1)                       | 247         | 55 (19.6)                       | 281         | 0.38 (0.23, 0.63)                | <.001           | 0.212               |
|             | COT            | 34 (12.5)                      | 271         | 40 (15.3)                       | 261         | 0.72 (0.46, 1.11)                | 0.136           |                     |
|             | BOOST NZ       | 7 (8.5)                        | 82          | 8 (10.0)                        | 80          | 0.73 (0.29, 1.86)                | 0.514           |                     |
|             | BOOST II UK    | 34 (16.3)                      | 208         | 55 (25.8)                       | 213         | 0.64 (0.44, 0.93)                | 0.020           |                     |
|             | BOOST II AUS   | 25 (10.3)                      | 242         | 24 (9.4)                        | 254         | 1.09 (0.64, 1.86)                | 0.745           |                     |
|             | <b>NeOProM</b> | <b>120 (11.4)</b>              | <b>1050</b> | <b>182 (16.7)</b>               | <b>1089</b> | <b>0.67 (0.54, 0.83)</b>         | <b>&lt;.001</b> |                     |
| Female      | SUPPORT        | 16 (6.8)                       | 235         | 38 (16.3)                       | 233         | 0.43 (0.24, 0.75)                | 0.003           |                     |
|             | COT            | 30 (13.1)                      | 229         | 26 (10.7)                       | 242         | 1.16 (0.72, 1.88)                | 0.542           |                     |
|             | BOOST NZ       | 7 (9.2)                        | 76          | 5 (7.1)                         | 70          | 1.29 (0.43, 3.84)                | 0.651           |                     |
|             | BOOST II UK    | 35 (18.9)                      | 185         | 33 (17.6)                       | 188         | 1.11 (0.73, 1.66)                | 0.631           |                     |
|             | BOOST II AUS   | 12 (4.9)                       | 245         | 24 (9.9)                        | 243         | 0.52 (0.26, 1.03)                | 0.061           |                     |
|             | <b>NeOProM</b> | <b>100 (10.3)</b>              | <b>970</b>  | <b>126 (12.9)</b>               | <b>976</b>  | <b>0.82 (0.65, 1.05)</b>         | <b>0.115</b>    |                     |
| Singleton   | SUPPORT        | 24 (6.6)                       | 361         | 65 (17.0)                       | 382         | 0.39 (0.25, 0.61)                | <.001           | 0.346               |
|             | COT            | 48 (14.4)                      | 334         | 42 (11.8)                       | 355         | 1.21 (0.83, 1.79)                | 0.324           |                     |
|             | BOOST NZ       | 12 (10.3)                      | 116         | 8 (7.2)                         | 111         | 1.44 (0.61, 3.38)                | 0.408           |                     |
|             | BOOST II UK    | 43 (15.5)                      | 277         | 60 (20.5)                       | 293         | 0.76 (0.53, 1.08)                | 0.127           |                     |
|             | BOOST II AUS   | 29 (7.9)                       | 366         | 36 (9.5)                        | 380         | 0.84 (0.52, 1.33)                | 0.454           |                     |
|             | <b>NeOProM</b> | <b>156 (10.7)</b>              | <b>1454</b> | <b>211 (13.9)</b>               | <b>1521</b> | <b>0.78 (0.64, 0.94)</b>         | <b>0.010</b>    |                     |
| Multiple    | SUPPORT        | 12 (9.9)                       | 121         | 28 (21.2)                       | 132         | 0.47 (0.23, 0.94)                | 0.033           |                     |
|             | COT            | 16 (9.6)                       | 166         | 24 (16.2)                       | 148         | 0.51 (0.31, 0.85)                | 0.009           |                     |
|             | BOOST NZ       | 2 (4.8)                        | 42          | 5 (12.8)                        | 39          | 0.41 (0.10, 1.64)                | 0.207           |                     |
|             | BOOST II UK    | 26 (22.4)                      | 116         | 28 (25.9)                       | 108         | 0.90 (0.58, 1.39)                | 0.639           |                     |
|             | BOOST II AUS   | 8 (6.6)                        | 121         | 12 (10.3)                       | 117         | 0.65 (0.27, 1.58)                | 0.342           |                     |
|             | <b>NeOProM</b> | <b>64 (11.3)</b>               | <b>566</b>  | <b>97 (17.8)</b>                | <b>544</b>  | <b>0.67 (0.51, 0.87)</b>         | <b>0.003</b>    |                     |
| start<6 hrs | SUPPORT        | 35 (7.4)                       | 473         | 91 (18.0)                       | 505         | 0.41 (0.28, 0.60)                | <.001           | <.001               |
|             | COT            | 3 (12.5)                       | 24          | 2 (8.7)                         | 23          | 1.45 (0.27, 7.72)                | 0.665           |                     |
|             | BOOST NZ       | 3 (11.5)                       | 26          | 2 (7.4)                         | 27          | 1.00 (0.99, 1.01)                | 0.545           |                     |
|             | BOOST II UK    |                                | .           |                                 | .           |                                  | .               |                     |
|             | BOOST II AUS   | 1 (2.0)                        | 49          | 6 (10.7)                        | 56          | 0.19 (0.02, 1.53)                | 0.119           |                     |
|             | <b>NeOProM</b> | <b>42 (7.3)</b>                | <b>572</b>  | <b>101 (16.5)</b>               | <b>611</b>  | <b>0.44 (0.31, 0.62)</b>         | <b>&lt;.001</b> |                     |
| >=6 hrs     | SUPPORT        | 0                              | 4           | 0                               | 4           |                                  | ***             |                     |
|             | COT            | 61 (12.8)                      | 476         | 64 (13.3)                       | 480         | 0.88 (0.65, 1.20)                | 0.417           |                     |
|             | BOOST NZ       | 11 (8.3)                       | 132         | 11 (8.9)                        | 123         | 0.88 (0.41, 1.88)                | 0.738           |                     |



eTable 27. Treated retinopathy of prematurity (ROP), by subgroups (continued)

|           |                | Lower Oxygen Saturation Target |             | Higher Oxygen Saturation Target |             | Adjusted* Relative Risk (95% CI) |                 |                     |
|-----------|----------------|--------------------------------|-------------|---------------------------------|-------------|----------------------------------|-----------------|---------------------|
| Subgroup  | Trial          | n (%)                          | N           | n (%)                           | N           | Adjusted RR                      | p-value         | interaction p-value |
|           | BOOST II UK    |                                | .           |                                 | .           |                                  | .               |                     |
|           | BOOST II AUS   | 36 (8.3)                       | 436         | 42 (9.5)                        | 441         | 0.87 (0.57, 1.34)                | 0.529           |                     |
|           | <b>NeOProM</b> | <b>108 (10.3)</b>              | <b>1048</b> | <b>117 (11.2)</b>               | <b>1048</b> | <b>0.93 (0.72, 1.18)</b>         | <b>0.531</b>    |                     |
| Original  | SUPPORT        | 36 (7.5)                       | 482         | 93 (18.1)                       | 514         | 0.41 (0.28, 0.60)                | <.001           | 0.339               |
| software  | COT            | 33 (14.0)                      | 235         | 28 (12.2)                       | 229         | 1.07 (0.70, 1.65)                | 0.754           |                     |
|           | BOOST NZ       | 14 (8.9)                       | 158         | 13 (8.7)                        | 150         | 0.88 (0.45, 1.73)                | 0.715           |                     |
|           | BOOST II UK    | 19 (19.8)                      | 96          | 28 (31.5)                       | 89          | 0.63 (0.38, 1.06)                | 0.083           |                     |
|           | BOOST II AUS   | 27 (8.9)                       | 304         | 26 (8.8)                        | 297         | 1.02 (0.61, 1.71)                | 0.941           |                     |
|           | <b>NeOProM</b> | <b>129 (10.1)</b>              | <b>1275</b> | <b>188 (14.7)</b>               | <b>1279</b> | <b>0.69 (0.56, 0.85)</b>         | <b>&lt;.001</b> |                     |
| Revised   | SUPPORT        |                                | .           |                                 | .           |                                  | .               |                     |
| software  | COT            | 26 (11.1)                      | 235         | 30 (12.9)                       | 232         | 0.84 (0.52, 1.34)                | 0.453           |                     |
|           | BOOST NZ       |                                | .           |                                 | .           |                                  | .               |                     |
|           | BOOST II UK    | 50 (16.8)                      | 297         | 60 (19.2)                       | 312         | 0.88 (0.63, 1.23)                | 0.465           |                     |
|           | BOOST II AUS   | 10 (5.5)                       | 183         | 22 (11.0)                       | 200         | 0.52 (0.26, 1.04)                | 0.066           |                     |
|           | <b>NeOProM</b> | <b>86 (12.0)</b>               | <b>715</b>  | <b>112 (15.1)</b>               | <b>744</b>  | <b>0.81 (0.63, 1.04)</b>         | <b>0.092</b>    |                     |
| SGA:      | SUPPORT        | 33 (7.1)                       | 465         | 79 (16.6)                       | 475         | 0.42 (0.28, 0.62)                | <.001           | 0.778               |
| Trialist  | COT            | 58 (12.7)                      | 458         | 56 (12.1)                       | 464         | 0.96 (0.70, 1.32)                | 0.823           |                     |
| defined - | BOOST II NZ    | 11 (7.8)                       | 141         | 11 (7.9)                        | 139         | 0.96 (0.46, 2.00)                | 0.912           |                     |
| No        | BOOST II UK    | 57 (17.3)                      | 330         | 75 (22.3)                       | 337         | 0.78 (0.58, 1.07)                | 0.121           |                     |
|           | BOOST II AUS   | 28 (6.7)                       | 421         | 41 (9.6)                        | 429         | 0.69 (0.44, 1.10)                | 0.121           |                     |
|           | <b>NeOProM</b> | <b>187 (10.3)</b>              | <b>1815</b> | <b>262 (14.2)</b>               | <b>1844</b> | <b>0.73 (0.61, 0.86)</b>         | <b>&lt;.001</b> |                     |
| Yes       | SUPPORT        | 3 (17.6)                       | 17          | 14 (35.9)                       | 39          | 0.48 (0.16, 1.46)                | 0.198           |                     |
|           | COT            | 6 (14.3)                       | 42          | 10 (25.6)                       | 39          | 0.56 (0.22, 1.39)                | 0.574           |                     |
|           | BOOST II NZ    | 3 (17.6)                       | 17          | 2 (18.2)                        | 11          | 0.94 (0.18, 4.78)                | 0.940           |                     |
|           | BOOST II UK    | 11 (17.7)                      | 62          | 12 (19.0)                       | 63          | 0.96 (0.46, 2.01)                | 0.923           |                     |
|           | BOOST II AUS   | 9 (13.6)                       | 66          | 7 (10.3)                        | 68          | 1.32 (0.53, 3.33)                | 0.551           |                     |
|           | <b>NeOProM</b> | <b>32 (15.7)</b>               | <b>204</b>  | <b>45 (20.5)</b>                | <b>220</b>  | <b>0.81 (0.53, 1.24)</b>         | <b>0.423</b>    |                     |
| SGA:      | SUPPORT        | 28 (6.7)                       | 421         | 68 (15.7)                       | 433         | 0.42 (0.27, 0.65)                | <.001           | 0.609               |
| NeOProM   | COT            | 58 (12.7)                      | 458         | 56 (12.1)                       | 464         | 0.96 (0.70, 1.32)                | 0.823           |                     |
| defined - | BOOST II NZ    | 11 (7.8)                       | 141         | 11 (7.9)                        | 139         | 0.96 (0.46, 2.00)                | 0.912           |                     |
| No        | BOOST II UK    | 59 (17.1)                      | 345         | 76 (21.3)                       | 356         | 0.81 (0.60, 1.10)                | 0.178           |                     |
|           | BOOST II AUS   | 28 (6.7)                       | 421         | 41 (9.6)                        | 429         | 0.69 (0.44, 1.10)                | 0.121           |                     |
|           | <b>NeOProM</b> | <b>184 (10.3)</b>              | <b>1786</b> | <b>252 (13.8)</b>               | <b>1821</b> | <b>0.75 (0.63, 0.89)</b>         | <b>0.001</b>    |                     |
| Yes       | SUPPORT        | 8 (13.1)                       | 61          | 25 (30.9)                       | 81          | 0.43 (0.21, 0.88)                | 0.021           |                     |
|           | COT            | 6 (14.3)                       | 42          | 10 (25.6)                       | 39          | 0.56 (0.22, 1.39)                | 0.574           |                     |
|           | BOOST II NZ    | 3 (17.6)                       | 17          | 2 (18.2)                        | 11          | 0.94 (0.18, 4.78)                | 0.940           |                     |
|           | BOOST II UK    | 10 (20.8)                      | 48          | 12 (26.7)                       | 45          | 0.80 (0.39, 1.66)                | 0.553           |                     |
|           | BOOST II AUS   | 9 (13.6)                       | 66          | 7 (10.3)                        | 68          | 1.32 (0.53, 3.33)                | 0.551           |                     |
|           | <b>NeOProM</b> | <b>36 (15.4)</b>               | <b>234</b>  | <b>56 (23.0)</b>                | <b>244</b>  | <b>0.70 (0.50, 0.98)</b>         | <b>0.036</b>    |                     |

\* Analysis adjusted for trials and multiple births

## Abbreviations/definitions

CI: confidence interval; RR: relative risk; GA: gestational age; SUPPORT: Surfactant Positive Airway Pressure and Pulse Oximetry Trial; COT: Canadian Oxygen Trial; BOOST: Benefits of Oxygen Saturation Targeting; NZ: New Zealand; UK: United Kingdom; AUS: Australia; NeOProM: Neonatal Oxygenation Prospective Meta-analysis; inborn: born inside the treating center; outborn: born outside the treating center (e.g. transferred from another hospital); vaginal: mode of delivery through the vagina; Caesarean: mode of delivery via surgical procedure; ANS: antenatal corticosteroids; singleton: child born as a single birth; multiple: more than one child per birth; start<6 hrs: intervention commenced less than 6 hours after birth; start>=6 hrs: intervention commenced greater than or equal to 6 hours after birth; original software: original oximeter software; revised software: revised oximeter software; SGA: small for gestational age; SGA NeOProM defined: small for gestational age as per definition used by NeOProM collaboration, i.e. less than 10th percentile using charts from Kramer et al.<sup>1</sup>

The subgroup analysis by oximeter software type (original vs revised) excludes n=74 infants in COT who were exposed to both the original and revised software.

Empty cells (.) indicate data not collected or not applicable in this trial.

\*\*\* Low / no event rate(s) makes parameter not estimable.

eTable 28. Positive airway pressure with endotracheal tube (ETT) at 36 weeks' postmenstrual age (PMA), by subgroups

| Subgroup  | Trial          | Lower Oxygen Saturation Target |             | Higher Oxygen Saturation Target |             | Adjusted* Relative Risk (95% CI) |              |                     |
|-----------|----------------|--------------------------------|-------------|---------------------------------|-------------|----------------------------------|--------------|---------------------|
|           |                | n (%)                          | N           | n (%)                           | N           | Adjusted RR                      | p-value      | interaction p-value |
| GA<26 wks | SUPPORT        | 28 (15.6)                      | 180         | 28 (13.5)                       | 208         | 1.19 (0.72, 1.95)                | 0.497        | 0.481               |
|           | COT            | 48 (18.5)                      | 260         | 58 (23.1)                       | 251         | 0.79 (0.57, 1.09)                | 0.155        |                     |
|           | BOOST NZ       | 2 (3.5)                        | 57          | 2 (3.3)                         | 61          | 1.07 (0.18, 6.40)                | 0.937        |                     |
|           | BOOST II UK    | 7 (5.2)                        | 134         | 5 (3.3)                         | 150         | 1.57 (0.51, 4.85)                | 0.434        |                     |
|           | BOOST II AUS   | 6 (3.4)                        | 178         | 8 (4.2)                         | 191         | 0.81 (0.29, 2.29)                | 0.690        |                     |
|           | <b>NeOProM</b> | <b>91 (11.2)</b>               | <b>809</b>  | <b>101 (11.7)</b>               | <b>861</b>  | <b>0.92 (0.71, 1.19)</b>         | <b>0.514</b> |                     |
| GA≥26 wks | SUPPORT        | 19 (7.0)                       | 271         | 16 (5.7)                        | 282         | 1.24 (0.65, 2.36)                | 0.513        |                     |
|           | COT            | 49 (14.4)                      | 341         | 41 (11.8)                       | 346         | 1.22 (0.83, 1.79)                | 0.319        |                     |
|           | BOOST NZ       | 1 (1.0)                        | 96          | 2 (2.3)                         | 87          | 0.46 (0.04, 4.92)                | 0.518        |                     |
|           | BOOST II UK    | 5 (2.1)                        | 235         | 7 (2.9)                         | 243         | 0.74 (0.24, 2.29)                | 0.606        |                     |
|           | BOOST II AUS   | 3 (1.0)                        | 299         | 8 (2.6)                         | 303         | 0.60 (0.30, 1.21)                | 0.153        |                     |
|           | <b>NeOProM</b> | <b>77 (6.2)</b>                | <b>1242</b> | <b>74 (5.9)</b>                 | <b>1261</b> | <b>1.05 (0.78, 1.42)</b>         | <b>0.733</b> |                     |
| Inborn    | SUPPORT        | 47 (10.4)                      | 451         | 44 (9.0)                        | 490         | 1.16 (0.78, 1.73)                | 0.455        | 0.491               |
|           | COT            | 92 (16.4)                      | 561         | 89 (16.5)                       | 541         | 0.98 (0.76, 1.28)                | 0.909        |                     |
|           | BOOST NZ       | 3 (2.1)                        | 143         | 4 (2.9)                         | 138         | 0.73 (0.17, 3.09)                | 0.670        |                     |
|           | BOOST II UK    | 11 (3.4)                       | 325         | 11 (3.2)                        | 347         | 1.08 (0.47, 2.45)                | 0.863        |                     |
|           | BOOST II AUS   | 9 (2.0)                        | 442         | 16 (3.4)                        | 466         | 0.57 (0.27, 1.23)                | 0.154        |                     |
|           | <b>NeOProM</b> | <b>162 (8.4)</b>               | <b>1922</b> | <b>164 (8.3)</b>                | <b>1982</b> | <b>0.99 (0.81, 1.21)</b>         | <b>0.904</b> |                     |
| Outborn   | SUPPORT        | .                              | .           | .                               | .           | .                                | .            |                     |
|           | COT            | 5 (12.5)                       | 40          | 10 (17.9)                       | 56          | 0.70 (0.26, 1.89)                | 0.487        |                     |
|           | BOOST NZ       | 0                              | 10          | 0                               | 10          |                                  | ***          |                     |
|           | BOOST II UK    | 1 (2.3)                        | 44          | 1 (2.2)                         | 46          | 1.04 (0.07, 15.8)                | 0.975        |                     |
|           | BOOST II AUS   | 0                              | 35          | 0                               | 28          |                                  | ***          |                     |
|           | <b>NeOProM</b> | <b>6 (4.7)</b>                 | <b>129</b>  | <b>11 (7.9)</b>                 | <b>140</b>  | <b>0.73 (0.29, 1.87)</b>         | <b>0.521</b> |                     |
| Vaginal   | SUPPORT        | 15 (10.6)                      | 142         | 9 (5.8)                         | 155         | 1.82 (0.82, 4.03)                | 0.141        | 0.008               |
|           | COT            | 40 (18.0)                      | 222         | 31 (12.8)                       | 242         | 1.41 (0.93, 2.14)                | 0.107        |                     |
|           | BOOST NZ       | 0                              | 62          | 1 (1.5)                         | 65          |                                  | ***          |                     |
|           | BOOST II UK    | 9 (4.2)                        | 212         | 6 (2.6)                         | 230         | 1.65 (0.59, 4.56)                | 0.337        |                     |
|           | BOOST II AUS   | 7 (3.1)                        | 223         | 8 (3.7)                         | 219         | 0.45 (0.09, 2.15)                | 0.318        |                     |
|           | <b>NeOProM</b> | <b>71 (8.2)</b>                | <b>861</b>  | <b>55 (6.0)</b>                 | <b>911</b>  | <b>1.36 (0.99, 1.88)</b>         | <b>0.061</b> |                     |
| Caesarean | SUPPORT        | 32 (10.4)                      | 309         | 35 (10.4)                       | 335         | 0.99 (0.63, 1.57)                | 0.973        |                     |
|           | COT            | 57 (15.2)                      | 376         | 68 (19.2)                       | 354         | 0.78 (0.57, 1.07)                | 0.125        |                     |
|           | BOOST NZ       | 3 (3.3)                        | 91          | 3 (3.6)                         | 83          | 0.92 (0.20, 4.16)                | 0.915        |                     |
|           | BOOST II UK    | 3 (1.9)                        | 157         | 6 (3.7)                         | 163         | 0.52 (0.13, 2.02)                | 0.341        |                     |
|           | BOOST II AUS   | 2 (0.8)                        | 253         | 8 (2.9)                         | 272         | 0.27 (0.06, 1.25)                | 0.094        |                     |
|           | <b>NeOProM</b> | <b>97 (8.2)</b>                | <b>1186</b> | <b>120 (9.9)</b>                | <b>1207</b> | <b>0.80 (0.63, 1.03)</b>         | <b>0.080</b> |                     |
| ANS - No  | SUPPORT        | 4 (21.1)                       | 19          | 0                               | 24          |                                  | ***          | 0.234               |
|           | COT            | 10 (14.3)                      | 70          | 18 (29.5)                       | 61          | 0.47 (0.23, 0.97)                | 0.040        |                     |
|           | BOOST NZ       | 0                              | 16          | 0                               | 13          |                                  | ***          |                     |

**eTable 28. Positive airway pressure with endotracheal tube (ETT) at 36 weeks' postmenstrual age (PMA), by subgroups (continued)**

| Subgroup    | Trial          | Lower Oxygen Saturation Target |             | Higher Oxygen Saturation Target |             | Adjusted* Relative Risk (95% CI) |              |                     |
|-------------|----------------|--------------------------------|-------------|---------------------------------|-------------|----------------------------------|--------------|---------------------|
|             |                | n (%)                          | N           | n (%)                           | N           | Adjusted RR                      | p-value      | interaction p-value |
|             | BOOST II UK    | 1 (3.7)                        | 27          | 1 (3.4)                         | 29          | 1.07 (0.07, 16.1)                | 0.961        |                     |
|             | BOOST II AUS   | 1 (1.9)                        | 52          | 2 (6.5)                         | 31          | 0.30 (0.03, 3.07)                | 0.310        |                     |
|             | <b>NeOProM</b> | <b>16 (8.7)</b>                | <b>184</b>  | <b>21 (13.3)</b>                | <b>158</b>  | <b>0.65 (0.39, 1.23)</b>         | <b>0.212</b> |                     |
| ANS - Yes   | SUPPORT        | 43 (10.0)                      | 432         | 44 (9.4)                        | 466         | 1.06 (0.70, 1.58)                | 0.793        |                     |
|             | COT            | 87 (16.4)                      | 529         | 81 (15.2)                       | 534         | 1.07 (0.82, 1.40)                | 0.626        |                     |
|             | BOOST NZ       | 3 (2.2)                        | 137         | 4 (3.0)                         | 135         | 0.75 (0.18, 3.16)                | 0.692        |                     |
|             | BOOST II UK    | 11 (3.2)                       | 340         | 11 (3.0)                        | 362         | 1.07 (0.47, 2.44)                | 0.869        |                     |
|             | BOOST II AUS   | 7 (1.7)                        | 423         | 14 (3.1)                        | 458         | 0.51 (0.22, 1.22)                | 0.130        |                     |
|             | <b>NeOProM</b> | <b>151 (8.1)</b>               | <b>1861</b> | <b>154 (7.9)</b>                | <b>1955</b> | <b>1.01 (0.82, 1.24)</b>         | <b>0.949</b> |                     |
| Male        | SUPPORT        | 28 (11.8)                      | 237         | 28 (10.1)                       | 277         | 1.20 (0.72, 1.98)                | 0.484        | 0.055               |
|             | COT            | 65 (19.8)                      | 328         | 53 (16.3)                       | 325         | 1.21 (0.87, 1.67)                | 0.261        |                     |
|             | BOOST NZ       | 2 (2.6)                        | 78          | 2 (2.5)                         | 80          | 1.04 (0.15, 7.17)                | 0.967        |                     |
|             | BOOST II UK    | 5 (2.6)                        | 193         | 4 (1.9)                         | 211         | 1.37 (0.37, 5.05)                | 0.634        |                     |
|             | BOOST II AUS   | 5 (2.1)                        | 235         | 8 (3.2)                         | 252         | 0.67 (0.22, 2.02)                | 0.476        |                     |
|             | <b>NeOProM</b> | <b>105 (9.8)</b>               | <b>1071</b> | <b>95 (8.3)</b>                 | <b>1145</b> | <b>1.16 (0.89, 1.50)</b>         | <b>0.273</b> |                     |
| Female      | SUPPORT        | 19 (8.9)                       | 214         | 16 (7.5)                        | 213         | 1.19 (0.63, 2.25)                | 0.594        |                     |
|             | COT            | 32 (11.7)                      | 273         | 46 (16.9)                       | 272         | 0.69 (0.46, 1.04)                | 0.073        |                     |
|             | BOOST NZ       | 1 (1.3)                        | 75          | 2 (2.9)                         | 68          | 0.41 (0.05, 3.56)                | 0.418        |                     |
|             | BOOST II UK    | 7 (4.0)                        | 176         | 8 (4.4)                         | 182         | 0.90 (0.34, 2.44)                | 0.842        |                     |
|             | BOOST II AUS   | 4 (1.7)                        | 242         | 8 (3.3)                         | 242         | 0.50 (0.15, 1.64)                | 0.251        |                     |
|             | <b>NeOProM</b> | <b>63 (6.4)</b>                | <b>980</b>  | <b>80 (8.2)</b>                 | <b>977</b>  | <b>0.78 (0.57, 1.06)</b>         | <b>0.118</b> |                     |
| Singleton   | SUPPORT        | 38 (11.1)                      | 341         | 35 (9.7)                        | 361         | 1.15 (0.74, 1.78)                | 0.530        | 0.071               |
|             | COT            | 70 (17.7)                      | 396         | 66 (15.9)                       | 416         | 1.11 (0.82, 1.51)                | 0.490        |                     |
|             | BOOST NZ       | 2 (1.8)                        | 112         | 2 (1.8)                         | 110         | 0.98 (0.14, 6.85)                | 0.985        |                     |
|             | BOOST II UK    | 9 (3.5)                        | 260         | 8 (2.8)                         | 285         | 1.23 (0.48, 3.15)                | 0.661        |                     |
|             | BOOST II AUS   | 8 (2.2)                        | 358         | 12 (3.2)                        | 377         | 0.70 (0.29, 1.70)                | 0.432        |                     |
|             | <b>NeOProM</b> | <b>127 (8.7)</b>               | <b>1467</b> | <b>123 (7.9)</b>                | <b>1549</b> | <b>1.09 (0.87, 1.38)</b>         | <b>0.453</b> |                     |
| Multiple    | SUPPORT        | 9 (8.2)                        | 110         | 9 (7.0)                         | 129         | 1.20 (0.46, 3.13)                | 0.706        |                     |
|             | COT            | 27 (13.2)                      | 205         | 33 (18.2)                       | 181         | 0.71 (0.46, 1.10)                | 0.122        |                     |
|             | BOOST NZ       | 1 (2.4)                        | 41          | 2 (5.3)                         | 38          | 0.46 (0.04, 4.82)                | 0.520        |                     |
|             | BOOST II UK    | 3 (2.8)                        | 109         | 4 (3.7)                         | 108         | 0.75 (0.17, 3.32)                | 0.706        |                     |
|             | BOOST II AUS   | 1 (0.8)                        | 119         | 4 (3.4)                         | 117         | 0.26 (0.03, 2.10)                | 0.204        |                     |
|             | <b>NeOProM</b> | <b>41 (7.0)</b>                | <b>584</b>  | <b>52 (9.1)</b>                 | <b>573</b>  | <b>0.72 (0.50, 1.04)</b>         | <b>0.081</b> |                     |
| start<6 hrs | SUPPORT        | 44 (9.9)                       | 443         | 42 (8.7)                        | 482         | 1.14 (0.76, 1.72)                | 0.524        | 0.754               |
|             | COT            | 4 (14.8)                       | 27          | 7 (26.9)                        | 26          | 0.60 (0.21, 1.68)                | 0.330        |                     |
|             | BOOST NZ       | 0                              | 25          | 1 (3.7)                         | 27          |                                  | ***          |                     |
|             | BOOST II UK    |                                | .           |                                 | .           |                                  | .            |                     |
|             | BOOST II AUS   | 1 (2.1)                        | 48          | 2 (3.6)                         | 55          | 0.61 (0.06, 5.84)                | 0.665        |                     |
|             | <b>NeOProM</b> | <b>49 (9.0)</b>                | <b>543</b>  | <b>52 (8.8)</b>                 | <b>590</b>  | <b>1.01 (0.69, 1.46)</b>         | <b>0.975</b> |                     |
| >=6 hrs     | SUPPORT        | 2 (50.0)                       | 4           | 1 (33.3)                        | 3           | 1.50 (0.23, 9.80)                | 0.672        |                     |

**eTable 28. Positive airway pressure with endotracheal tube (ETT) at 36 weeks' postmenstrual age (PMA), by subgroups (continued)**

|           |                | Lower Oxygen Saturation Target |             | Higher Oxygen Saturation Target |             | Adjusted* Relative Risk (95% CI) |              |                     |
|-----------|----------------|--------------------------------|-------------|---------------------------------|-------------|----------------------------------|--------------|---------------------|
| Subgroup  | Trial          | n (%)                          | N           | n (%)                           | N           | Adjusted RR                      | p-value      | interaction p-value |
|           | COT            | 93 (16.2)                      | 574         | 92 (16.1)                       | 571         | 1.00 (0.77, 1.30)                | 0.989        |                     |
|           | BOOST NZ       | 3 (2.3)                        | 128         | 3 (2.5)                         | 121         | 0.96 (0.21, 4.37)                | 0.962        |                     |
|           | BOOST II UK    |                                | .           |                                 | .           |                                  | .            |                     |
|           | BOOST II AUS   | 8 (1.9)                        | 427         | 14 (3.2)                        | 439         | 0.59 (0.27, 1.28)                | 0.181        |                     |
|           | <b>NeOProM</b> | <b>106 (9.4)</b>               | <b>1133</b> | <b>110 (9.7)</b>                | <b>1134</b> | <b>0.95 (0.74, 1.21)</b>         | <b>0.671</b> |                     |
| Original  | SUPPORT        | 47 (10.4)                      | 451         | 44 (9.0)                        | 490         | 1.16 (0.78, 1.73)                | 0.455        | 0.166               |
| software  | COT            | 53 (18.5)                      | 286         | 45 (16.2)                       | 278         | 1.09 (0.76, 1.56)                | 0.634        |                     |
|           | BOOST NZ       | 3 (2.0)                        | 153         | 4 (2.7)                         | 148         | 0.73 (0.17, 3.11)                | 0.673        |                     |
|           | BOOST II UK    | 4 (4.2)                        | 95          | 1 (1.1)                         | 88          | 3.69 (0.43, 31.8)                | 0.235        |                     |
|           | BOOST II AUS   | 7 (2.4)                        | 296         | 8 (2.7)                         | 296         | 0.87 (0.32, 2.38)                | 0.792        |                     |
|           | <b>NeOProM</b> | <b>114 (8.9)</b>               | <b>1281</b> | <b>102 (7.8)</b>                | <b>1300</b> | <b>1.13 (0.88, 1.45)</b>         | <b>0.353</b> |                     |
| Revised   | SUPPORT        |                                | .           |                                 | .           |                                  | .            |                     |
| software  | COT            | 41 (14.5)                      | 283         | 43 (15.5)                       | 277         | 0.93 (0.63, 1.37)                | 0.727        |                     |
|           | BOOST NZ       |                                | .           |                                 | .           |                                  | .            |                     |
|           | BOOST II UK    | 8 (2.9)                        | 274         | 11 (3.6)                        | 305         | 0.82 (0.33, 2.00)                | 0.657        |                     |
|           | BOOST II AUS   | 2 (1.1)                        | 181         | 8 (4.0)                         | 198         | 0.36 (0.01, 14.2)                | 0.587        |                     |
|           | <b>NeOProM</b> | <b>51 (6.9)</b>                | <b>738</b>  | <b>62 (7.9)</b>                 | <b>780</b>  | <b>0.84 (0.60, 1.17)</b>         | <b>0.304</b> |                     |
| SGA:      | SUPPORT        | 42 (9.8)                       | 429         | 35 (7.8)                        | 449         | 1.25 (0.81, 1.93)                | 0.308        | 0.021               |
| Trialist  | COT            | 86 (15.7)                      | 547         | 81 (14.8)                       | 546         | 1.05 (0.80, 1.38)                | 0.724        |                     |
| defined - | BOOST II NZ    | 2 (1.5)                        | 136         | 2 (1.5)                         | 137         | 1.00 (0.15, 6.56)                | 0.997        |                     |
| No        | BOOST II UK    | 10 (3.2)                       | 310         | 10 (3.0)                        | 332         | 1.08 (0.45, 2.55)                | 0.869        |                     |
|           | BOOST II AUS   | 9 (2.2)                        | 416         | 11 (2.6)                        | 427         | 0.75 (0.31, 1.77)                | 0.505        |                     |
|           | <b>NeOProM</b> | <b>149 (8.1)</b>               | <b>1838</b> | <b>139 (7.4)</b>                | <b>1891</b> | <b>1.08 (0.87, 1.34)</b>         | <b>0.491</b> |                     |
| Yes       | SUPPORT        | 5 (22.7)                       | 22          | 9 (22.0)                        | 41          | 1.02 (0.39, 2.68)                | 0.961        |                     |
|           | COT            | 11 (20.4)                      | 54          | 18 (35.3)                       | 51          | 0.44 (0.14, 1.35)                | 0.152        |                     |
|           | BOOST II NZ    | 1 (5.9)                        | 17          | 2 (18.2)                        | 11          | 0.31 (0.03, 3.07)                | 0.319        |                     |
|           | BOOST II UK    | 2 (3.4)                        | 58          | 2 (3.3)                         | 60          | 1.09 (0.35, 3.43)                | 0.880        |                     |
|           | BOOST II AUS   | 0                              | 61          | 5 (7.5)                         | 67          |                                  | ***          |                     |
|           | <b>NeOProM</b> | <b>19 (9.0)</b>                | <b>212</b>  | <b>36 (15.7)</b>                | <b>230</b>  | <b>0.60 (0.37, 0.97)</b>         | <b>0.042</b> |                     |
| SGA:      | SUPPORT        | 36 (9.3)                       | 389         | 28 (7.0)                        | 400         | 1.32 (0.82, 2.13)                | 0.257        | 0.029               |
| NeOProM   | COT            | 86 (15.7)                      | 547         | 81 (14.8)                       | 546         | 1.05 (0.80, 1.38)                | 0.724        |                     |
| defined - | BOOST II NZ    | 2 (1.5)                        | 136         | 2 (1.5)                         | 137         | 1.00 (0.15, 6.56)                | 0.997        |                     |
| No        | BOOST II UK    | 10 (3.1)                       | 326         | 9 (2.6)                         | 349         | 1.20 (0.49, 2.90)                | 0.694        |                     |
|           | BOOST II AUS   | 9 (2.2)                        | 416         | 11 (2.6)                        | 427         | 0.75 (0.31, 1.77)                | 0.505        |                     |
|           | <b>NeOProM</b> | <b>143 (7.9)</b>               | <b>1814</b> | <b>131 (7.0)</b>                | <b>1859</b> | <b>1.09 (0.87, 1.36)</b>         | <b>0.443</b> |                     |
| Yes       | SUPPORT        | 11 (17.7)                      | 62          | 16 (17.8)                       | 90          | 1.00 (0.50, 2.00)                | 0.994        |                     |
|           | COT            | 11 (20.4)                      | 54          | 18 (35.3)                       | 51          | 0.44 (0.14, 1.35)                | 0.152        |                     |
|           | BOOST II NZ    | 1 (5.9)                        | 17          | 2 (18.2)                        | 11          | 0.31 (0.03, 3.07)                | 0.319        |                     |
|           | BOOST II UK    | 2 (4.7)                        | 43          | 3 (6.8)                         | 44          | 0.75 (0.17, 3.30)                | 0.705        |                     |
|           | BOOST II AUS   | 0                              | 61          | 5 (7.5)                         | 67          |                                  | ***          |                     |

**eTable 28. Positive airway pressure with endotracheal tube (ETT) at 36 weeks' postmenstrual age . (PMA), by subgroups (continued)**

|          |         | Lower Oxygen Saturation Target |     | Higher Oxygen Saturation Target |     | Adjusted* Relative Risk (95% CI) |         |                     |
|----------|---------|--------------------------------|-----|---------------------------------|-----|----------------------------------|---------|---------------------|
| Subgroup | Trial   | n (%)                          | N   | n (%)                           | N   | Adjusted RR                      | p-value | interaction p-value |
|          | NeOProM | 25 (10.5)                      | 237 | 44 (16.7)                       | 263 | 0.60 (0.38, 0.96)                | 0.034   |                     |

\* Analysis adjusted for trials and multiple births

**Abbreviations/definitions**

CI: confidence interval; RR: relative risk; GA: gestational age; SUPPORT: Surfactant Positive Airway Pressure and Pulse Oximetry Trial; COT: Canadian Oxygen Trial; BOOST: Benefits of Oxygen Saturation Targeting; NZ: New Zealand; UK: United Kingdom; AUS: Australia; NeOProM: Neonatal Oxygenation Prospective Meta-analysis; inborn: born inside the treating center; outborn: born outside the treating center (e.g. transferred from another hospital); vaginal: mode of delivery through the vagina; Caesarean: mode of delivery via surgical procedure; ANS: antenatal corticosteroids; singleton: child born as a single birth; multiple: more than one child per birth; start<6 hrs: intervention commenced less than 6 hours after birth; start>=6 hrs: intervention commenced greater than or equal to 6 hours after birth; original software: original oximeter software; revised software: revised oximeter software; SGA: small for gestational age; SGA NeOProM defined: small for gestational age as per definition used by NeOProM collaboration, i.e. less than 10th percentile using charts from Kramer et al.<sup>1</sup>

The subgroup analysis by oximeter software type (original vs revised) excludes n=74 infants in COT who were exposed to both the original and revised software.

Empty cells (.) indicate data not collected or not applicable in this trial.

\*\*\* Low / no event rate(s) makes parameter not estimable.

**eTable 29. Positive airway pressure without endotracheal tube (ETT) at 36 weeks' postmenstrual age (PMA), by subgroups**

| Subgroup  | Trial          | Lower Oxygen Saturation Target |             | Higher Oxygen Saturation Target |             | Adjusted* Relative Risk (95% CI) |              |                     |
|-----------|----------------|--------------------------------|-------------|---------------------------------|-------------|----------------------------------|--------------|---------------------|
|           |                | n (%)                          | N           | n (%)                           | N           | Adjusted RR                      | p-value      | interaction p-value |
| GA<26 wks | SUPPORT        | 55 (30.6)                      | 180         | 80 (38.5)                       | 208         | 0.81 (0.61, 1.08)                | 0.149        | 0.485               |
|           | COT            | 82 (31.5)                      | 260         | 92 (36.7)                       | 251         | 0.82 (0.66, 1.03)                | 0.085        |                     |
|           | BOOST NZ       | 19 (33.3)                      | 57          | 27 (44.3)                       | 61          | 0.79 (0.51, 1.22)                | 0.280        |                     |
|           | BOOST II UK    | 30 (22.4)                      | 134         | 38 (25.3)                       | 150         | 0.95 (0.61, 1.47)                | 0.817        |                     |
|           | BOOST II AUS   | 50 (28.1)                      | 178         | 51 (26.7)                       | 191         | 1.04 (0.76, 1.43)                | 0.786        |                     |
|           | <b>NeOProM</b> | <b>236 (29.2)</b>              | <b>809</b>  | <b>288 (33.4)</b>               | <b>861</b>  | <b>0.87 (0.75, 0.99)</b>         | <b>0.041</b> |                     |
| GA≥26 wks | SUPPORT        | 56 (20.7)                      | 271         | 86 (30.5)                       | 282         | 0.70 (0.52, 0.95)                | 0.020        |                     |
|           | COT            | 95 (27.9)                      | 341         | 86 (24.9)                       | 346         | 1.11 (0.88, 1.39)                | 0.394        |                     |
|           | BOOST NZ       | 19 (19.8)                      | 96          | 19 (21.8)                       | 87          | 0.89 (0.51, 1.55)                | 0.675        |                     |
|           | BOOST II UK    | 36 (15.3)                      | 235         | 38 (15.6)                       | 243         | 0.87 (0.57, 1.32)                | 0.508        |                     |
|           | BOOST II AUS   | 48 (16.1)                      | 299         | 47 (15.5)                       | 303         | 0.99 (0.69, 1.42)                | 0.955        |                     |
|           | <b>NeOProM</b> | <b>254 (20.5)</b>              | <b>1242</b> | <b>276 (21.9)</b>               | <b>1261</b> | <b>0.93 (0.80, 1.07)</b>         | <b>0.322</b> |                     |
| Inborn    | SUPPORT        | 111 (24.6)                     | 451         | 166 (33.9)                      | 490         | 0.75 (0.61, 0.92)                | 0.006        | 0.994               |
|           | COT            | 163 (29.1)                     | 561         | 160 (29.6)                      | 541         | 0.94 (0.80, 1.11)                | 0.467        |                     |
|           | BOOST NZ       | 36 (25.2)                      | 143         | 45 (32.6)                       | 138         | 0.79 (0.55, 1.13)                | 0.202        |                     |
|           | BOOST II UK    | 58 (17.8)                      | 325         | 68 (19.6)                       | 347         | 0.93 (0.68, 1.28)                | 0.663        |                     |
|           | BOOST II AUS   | 95 (21.5)                      | 442         | 89 (19.1)                       | 466         | 1.09 (0.85, 1.40)                | 0.481        |                     |
|           | <b>NeOProM</b> | <b>463 (24.1)</b>              | <b>1922</b> | <b>528 (26.6)</b>               | <b>1982</b> | <b>0.89 (0.81, 0.99)</b>         | <b>0.032</b> |                     |
| Outborn   | SUPPORT        | .                              | .           | .                               | .           | .                                | .            |                     |
|           | COT            | 14 (35.0)                      | 40          | 18 (32.1)                       | 56          | 1.02 (0.56, 1.87)                | 0.938        |                     |
|           | BOOST NZ       | 2 (20.0)                       | 10          | 1 (10.0)                        | 10          | 1.93 (0.22, 16.8)                | 0.551        |                     |
|           | BOOST II UK    | 8 (18.2)                       | 44          | 8 (17.4)                        | 46          | 1.17 (0.51, 2.68)                | 0.709        |                     |
|           | BOOST II AUS   | 3 (8.6)                        | 35          | 9 (32.1)                        | 28          | 0.44 (0.08, 2.42)                | 0.344        |                     |
|           | <b>NeOProM</b> | <b>27 (20.9)</b>               | <b>129</b>  | <b>36 (25.7)</b>                | <b>140</b>  | <b>0.87 (0.56, 1.35)</b>         | <b>0.533</b> |                     |
| Vaginal   | SUPPORT        | 35 (24.6)                      | 142         | 46 (29.7)                       | 155         | 0.84 (0.57, 1.22)                | 0.356        | 0.171               |
|           | COT            | 64 (28.8)                      | 222         | 58 (24.0)                       | 242         | 1.19 (0.88, 1.63)                | 0.262        |                     |
|           | BOOST NZ       | 17 (27.4)                      | 62          | 17 (26.2)                       | 65          | 1.88 (0.65, 5.39)                | 0.243        |                     |
|           | BOOST II UK    | 33 (15.6)                      | 212         | 47 (20.4)                       | 230         | 0.84 (0.55, 1.26)                | 0.397        |                     |
|           | BOOST II AUS   | 38 (17.0)                      | 223         | 39 (17.8)                       | 219         | 0.96 (0.64, 1.42)                | 0.823        |                     |
|           | <b>NeOProM</b> | <b>187 (21.7)</b>              | <b>861</b>  | <b>207 (22.7)</b>               | <b>911</b>  | <b>0.97 (0.82, 1.15)</b>         | <b>0.748</b> |                     |
| Caesarean | SUPPORT        | 76 (24.6)                      | 309         | 120 (35.8)                      | 335         | 0.70 (0.55, 0.90)                | 0.005        |                     |
|           | COT            | 112 (29.8)                     | 376         | 119 (33.6)                      | 354         | 0.87 (0.72, 1.05)                | 0.139        |                     |
|           | BOOST NZ       | 21 (23.1)                      | 91          | 29 (34.9)                       | 83          | 0.66 (0.42, 1.05)                | 0.077        |                     |
|           | BOOST II UK    | 33 (21.0)                      | 157         | 29 (17.8)                       | 163         | 1.06 (0.66, 1.69)                | 0.823        |                     |
|           | BOOST II AUS   | 60 (23.7)                      | 253         | 59 (21.7)                       | 272         | 1.04 (0.77, 1.39)                | 0.816        |                     |
|           | <b>NeOProM</b> | <b>302 (25.5)</b>              | <b>1186</b> | <b>356 (29.5)</b>               | <b>1207</b> | <b>0.84 (0.75, 0.95)</b>         | <b>0.007</b> |                     |
| ANS – No  | SUPPORT        | 2 (10.5)                       | 19          | 9 (37.5)                        | 24          | 0.32 (0.07, 1.34)                | 0.118        | 0.172               |
|           | COT            | 23 (32.9)                      | 70          | 26 (42.6)                       | 61          | 0.78 (0.50, 1.21)                | 0.260        |                     |
|           | BOOST NZ       | 4 (25.0)                       | 16          | 4 (30.8)                        | 13          | 0.82 (0.30, 2.25)                | 0.701        |                     |

**eTable 29. Positive airway pressure without endotracheal tube (ETT) at 36 weeks' postmenstrual age (PMA), by subgroups (continued)**

| Subgroup    | Trial          | Lower Oxygen Saturation Target |             | Higher Oxygen Saturation Target |             | Adjusted* Relative Risk (95% CI) |              |                     |
|-------------|----------------|--------------------------------|-------------|---------------------------------|-------------|----------------------------------|--------------|---------------------|
|             |                | n (%)                          | N           | n (%)                           | N           | Adjusted RR                      | p-value      | interaction p-value |
|             | BOOST II UK    | 6 (22.2)                       | 27          | 3 (10.3)                        | 29          | 2.15 (0.60, 7.75)                | 0.141        |                     |
|             | BOOST II AUS   | 4 (7.7)                        | 52          | 7 (22.6)                        | 31          | 0.34 (0.11, 1.06)                | 0.062        |                     |
|             | <b>NeOProM</b> | <b>39 (21.2)</b>               | <b>184</b>  | <b>49 (31.0)</b>                | <b>158</b>  | <b>0.73 (0.51, 1.04)</b>         | <b>0.084</b> |                     |
| ANS - Yes   | SUPPORT        | 109 (25.2)                     | 432         | 157 (33.7)                      | 466         | 0.77 (0.62, 0.95)                | 0.014        |                     |
|             | COT            | 153 (28.9)                     | 529         | 152 (28.5)                      | 534         | 0.97 (0.82, 1.16)                | 0.765        |                     |
|             | BOOST NZ       | 34 (24.8)                      | 137         | 42 (31.1)                       | 135         | 0.81 (0.56, 1.18)                | 0.279        |                     |
|             | BOOST II UK    | 59 (17.4)                      | 340         | 71 (19.6)                       | 362         | 0.90 (0.66, 1.23)                | 0.520        |                     |
|             | BOOST II AUS   | 94 (22.2)                      | 423         | 89 (19.4)                       | 458         | 1.11 (0.86, 1.41)                | 0.424        |                     |
|             | <b>NeOProM</b> | <b>449 (24.1)</b>              | <b>1861</b> | <b>511 (26.1)</b>               | <b>1955</b> | <b>0.91 (0.82, 1.02)</b>         | <b>0.093</b> |                     |
| Male        | SUPPORT        | 67 (28.3)                      | 237         | 92 (33.2)                       | 277         | 0.87 (0.66, 1.13)                | 0.296        | 0.369               |
|             | COT            | 96 (29.3)                      | 328         | 92 (28.3)                       | 325         | 1.02 (0.80, 1.29)                | 0.882        |                     |
|             | BOOST NZ       | 18 (23.1)                      | 78          | 27 (33.8)                       | 80          | 0.73 (0.46, 1.17)                | 0.196        |                     |
|             | BOOST II UK    | 39 (20.2)                      | 193         | 48 (22.7)                       | 211         | 0.88 (0.61, 1.28)                | 0.510        |                     |
|             | BOOST II AUS   | 50 (21.3)                      | 235         | 52 (20.6)                       | 252         | 1.01 (0.72, 1.43)                | 0.943        |                     |
|             | <b>NeOProM</b> | <b>270 (25.2)</b>              | <b>1071</b> | <b>311 (27.2)</b>               | <b>1145</b> | <b>0.93 (0.81, 1.06)</b>         | <b>0.282</b> |                     |
| Female      | SUPPORT        | 44 (20.6)                      | 214         | 74 (34.7)                       | 213         | 0.60 (0.43, 0.83)                | 0.002        |                     |
|             | COT            | 81 (29.7)                      | 273         | 86 (31.6)                       | 272         | 0.95 (0.77, 1.17)                | 0.613        |                     |
|             | BOOST NZ       | 20 (26.7)                      | 75          | 19 (27.9)                       | 68          | 0.26 (0.04, 1.67)                | 0.158        |                     |
|             | BOOST II UK    | 27 (15.3)                      | 176         | 28 (15.4)                       | 182         | 0.96 (0.60, 1.52)                | 0.855        |                     |
|             | BOOST II AUS   | 48 (19.8)                      | 242         | 46 (19.0)                       | 242         | 1.01 (0.71, 1.43)                | 0.974        |                     |
|             | <b>NeOProM</b> | <b>220 (22.4)</b>              | <b>980</b>  | <b>253 (25.9)</b>               | <b>977</b>  | <b>0.85 (0.74, 0.99)</b>         | <b>0.032</b> |                     |
| Singleton   | SUPPORT        | 93 (27.3)                      | 341         | 117 (32.4)                      | 361         | 0.84 (0.67, 1.06)                | 0.139        | 0.273               |
|             | COT            | 119 (30.1)                     | 396         | 125 (30.0)                      | 416         | 1.00 (0.81, 1.23)                | 0.999        |                     |
|             | BOOST NZ       | 26 (23.2)                      | 112         | 35 (31.8)                       | 110         | 0.73 (0.47, 1.13)                | 0.154        |                     |
|             | BOOST II UK    | 42 (16.2)                      | 260         | 47 (16.5)                       | 285         | 0.98 (0.67, 1.43)                | 0.915        |                     |
|             | BOOST II AUS   | 73 (20.4)                      | 358         | 75 (19.9)                       | 377         | 1.02 (0.77, 1.37)                | 0.867        |                     |
|             | <b>NeOProM</b> | <b>353 (24.1)</b>              | <b>1467</b> | <b>399 (25.8)</b>               | <b>1549</b> | <b>0.93 (0.82, 1.05)</b>         | <b>0.239</b> |                     |
| Multiple    | SUPPORT        | 18 (16.4)                      | 110         | 49 (38.0)                       | 129         | 0.45 (0.26, 0.76)                | 0.003        |                     |
|             | COT            | 58 (28.3)                      | 205         | 53 (29.3)                       | 181         | 0.90 (0.70, 1.17)                | 0.433        |                     |
|             | BOOST NZ       | 12 (29.3)                      | 41          | 11 (28.9)                       | 38          | 1.01 (0.56, 1.80)                | 0.983        |                     |
|             | BOOST II UK    | 24 (22.0)                      | 109         | 29 (26.9)                       | 108         | 0.84 (0.55, 1.28)                | 0.413        |                     |
|             | BOOST II AUS   | 25 (21.0)                      | 119         | 23 (19.7)                       | 117         | 0.97 (0.63, 1.47)                | 0.876        |                     |
|             | <b>NeOProM</b> | <b>137 (23.5)</b>              | <b>584</b>  | <b>165 (28.8)</b>               | <b>573</b>  | <b>0.83 (0.70, 0.98)</b>         | <b>0.029</b> |                     |
| start<6 hrs | SUPPORT        | 110 (24.8)                     | 443         | 166 (34.4)                      | 482         | 0.74 (0.60, 0.91)                | 0.005        | 0.115               |
|             | COT            | 3 (11.1)                       | 27          | 11 (42.3)                       | 26          | 0.31 (0.11, 0.88)                | 0.029        |                     |
|             | BOOST NZ       | 12 (48.0)                      | 25          | 7 (25.9)                        | 27          | 1.67 (0.73, 3.82)                | 0.228        |                     |
|             | BOOST II UK    |                                | .           |                                 | .           |                                  | .            |                     |
|             | BOOST II AUS   | 16 (33.3)                      | 48          | 14 (25.5)                       | 55          | 1.29 (0.75, 2.23)                | 0.360        |                     |
|             | <b>NeOProM</b> | <b>141 (26.0)</b>              | <b>543</b>  | <b>198 (33.6)</b>               | <b>590</b>  | <b>0.80 (0.66, 0.96)</b>         | <b>0.016</b> |                     |
| >=6 hrs     | SUPPORT        | 0                              | 4           | 0                               | 3           |                                  | ***          |                     |



**eTable 29. Positive airway pressure without endotracheal tube (ETT) at 36 weeks' postmenstrual age (PMA), by subgroups (continued)**

|                            |                | Lower Oxygen Saturation Target |             | Higher Oxygen Saturation Target |             | Adjusted* Relative Risk (95% CI) |              |                     |
|----------------------------|----------------|--------------------------------|-------------|---------------------------------|-------------|----------------------------------|--------------|---------------------|
| Subgroup                   | Trial          | n (%)                          | N           | n (%)                           | N           | Adjusted RR                      | p-value      | interaction p-value |
|                            | COT            | 174 (30.3)                     | 574         | 167 (29.2)                      | 571         | 1.00 (0.85, 1.18)                | 0.972        |                     |
|                            | BOOST NZ       | 26 (20.3)                      | 128         | 39 (32.2)                       | 121         | 0.65 (0.43, 0.98)                | 0.038        |                     |
|                            | BOOST II UK    |                                | .           |                                 | .           |                                  | .            |                     |
|                            | BOOST II AUS   | 81 (19.0)                      | 427         | 84 (19.1)                       | 439         | 0.97 (0.74, 1.26)                | 0.822        |                     |
|                            | <b>NeOProM</b> | <b>281 (24.8)</b>              | <b>1133</b> | <b>290 (25.6)</b>               | <b>1134</b> | <b>0.95 (0.84, 1.11)</b>         | <b>0.652</b> |                     |
| Original software          | SUPPORT        | 111 (24.6)                     | 451         | 166 (33.9)                      | 490         | 0.75 (0.61, 0.92)                | 0.006        | 0.317               |
|                            | COT            | 86 (30.1)                      | 286         | 74 (26.6)                       | 278         | 1.07 (0.83, 1.37)                | 0.612        |                     |
|                            | BOOST NZ       | 38 (24.8)                      | 153         | 46 (31.1)                       | 148         | 0.81 (0.57, 1.16)                | 0.252        |                     |
|                            | BOOST II UK    | 16 (16.8)                      | 95          | 16 (18.2)                       | 88          | 1.00 (0.53, 1.86)                | 0.992        |                     |
|                            | BOOST II AUS   | 51 (17.2)                      | 296         | 54 (18.2)                       | 296         | 0.93 (0.66, 1.31)                | 0.695        |                     |
|                            | <b>NeOProM</b> | <b>302 (23.6)</b>              | <b>1281</b> | <b>356 (27.4)</b>               | <b>1300</b> | <b>0.87 (0.77, 0.99)</b>         | <b>0.037</b> |                     |
| Revised software           | SUPPORT        |                                | .           |                                 | .           |                                  | .            |                     |
|                            | COT            | 82 (29.0)                      | 283         | 85 (30.7)                       | 277         | 0.94 (0.75, 1.19)                | 0.625        |                     |
|                            | BOOST NZ       |                                | .           |                                 | .           |                                  | .            |                     |
|                            | BOOST II UK    | 50 (18.2)                      | 274         | 60 (19.7)                       | 305         | 0.90 (0.64, 1.27)                | 0.555        |                     |
|                            | BOOST II AUS   | 47 (26.0)                      | 181         | 44 (22.2)                       | 198         | 1.13 (0.81, 1.57)                | 0.482        |                     |
|                            | <b>NeOProM</b> | <b>179 (24.3)</b>              | <b>738</b>  | <b>189 (24.2)</b>               | <b>780</b>  | <b>0.97 (0.82, 1.15)</b>         | <b>0.731</b> |                     |
| SGA: Trialist defined - No | SUPPORT        | 100 (23.3)                     | 429         | 148 (33.0)                      | 449         | 0.73 (0.58, 0.91)                | 0.005        | 0.349               |
|                            | COT            | 153 (28.0)                     | 547         | 155 (28.4)                      | 546         | 0.96 (0.80, 1.15)                | 0.652        |                     |
|                            | BOOST II NZ    | 29 (21.3)                      | 136         | 38 (27.7)                       | 137         | 0.79 (0.53, 1.18)                | 0.247        |                     |
|                            | BOOST II UK    | 48 (15.5)                      | 310         | 60 (18.1)                       | 332         | 0.89 (0.62, 1.26)                | 0.498        |                     |
|                            | BOOST II AUS   | 74 (17.8)                      | 416         | 69 (16.2)                       | 427         | 1.07 (0.80, 1.42)                | 0.653        |                     |
|                            | <b>NeOProM</b> | <b>404 (22.0)</b>              | <b>1838</b> | <b>470 (24.9)</b>               | <b>1891</b> | <b>0.88 (0.79, 0.99)</b>         | <b>0.028</b> |                     |
| Yes                        | SUPPORT        | 11 (50.0)                      | 22          | 18 (43.9)                       | 41          | 1.14 (0.66, 1.96)                | 0.838        |                     |
|                            | COT            | 24 (44.4)                      | 54          | 23 (45.1)                       | 51          | 0.99 (0.64, 1.57)                | 0.951        |                     |
|                            | BOOST II NZ    | 9 (52.9)                       | 17          | 8 (72.7)                        | 11          | 0.73 (0.41, 1.29)                | 0.892        |                     |
|                            | BOOST II UK    | 18 (31.0)                      | 58          | 16 (26.7)                       | 60          | 1.16 (0.66, 2.05)                | 0.599        |                     |
|                            | BOOST II AUS   | 24 (39.3)                      | 61          | 29 (43.3)                       | 67          | 0.91 (0.61, 1.36)                | 0.650        |                     |
|                            | <b>NeOProM</b> | <b>86 (40.6)</b>               | <b>212</b>  | <b>94 (40.9)</b>                | <b>230</b>  | <b>0.99 (0.79, 1.23)</b>         | <b>0.728</b> |                     |
| SGA: NeOProM defined - No  | SUPPORT        | 93 (23.9)                      | 389         | 130 (32.5)                      | 400         | 0.76 (0.60, 0.96)                | 0.022        | 0.887               |
|                            | COT            | 153 (28.0)                     | 547         | 155 (28.4)                      | 546         | 0.96 (0.80, 1.15)                | 0.652        |                     |
|                            | BOOST II NZ    | 29 (21.3)                      | 136         | 38 (27.7)                       | 137         | 0.79 (0.53, 1.18)                | 0.247        |                     |
|                            | BOOST II UK    | 50 (15.3)                      | 326         | 62 (17.8)                       | 349         | 0.89 (0.63, 1.26)                | 0.509        |                     |
|                            | BOOST II AUS   | 74 (17.8)                      | 416         | 69 (16.2)                       | 427         | 1.07 (0.80, 1.42)                | 0.653        |                     |
|                            | <b>NeOProM</b> | <b>399 (22.0)</b>              | <b>1814</b> | <b>454 (24.4)</b>               | <b>1859</b> | <b>0.90 (0.80, 1.00)</b>         | <b>0.058</b> |                     |
| Yes                        | SUPPORT        | 18 (29.0)                      | 62          | 36 (40.0)                       | 90          | 0.75 (0.47, 1.19)                | 0.226        |                     |
|                            | COT            | 24 (44.4)                      | 54          | 23 (45.1)                       | 51          | 0.99 (0.64, 1.51)                | 0.951        |                     |
|                            | BOOST II NZ    | 9 (52.9)                       | 17          | 8 (72.7)                        | 11          | 0.73 (0.41, 1.29)                | 0.892        |                     |
|                            | BOOST II UK    | 16 (37.2)                      | 43          | 14 (31.8)                       | 44          | 1.17 (0.65, 2.09)                | 0.622        |                     |
|                            | BOOST II AUS   | 24 (39.3)                      | 61          | 29 (43.3)                       | 67          | 0.91 (0.61, 1.36)                | 0.650        |                     |

**eTable 29. Positive airway pressure without endotracheal tube (ETT) at 36 weeks' postmenstrual age (PMA), by subgroups (continued)**

|          |         | Lower Oxygen Saturation Target |     | Higher Oxygen Saturation Target |     | Adjusted* Relative Risk (95% CI) |         |                     |
|----------|---------|--------------------------------|-----|---------------------------------|-----|----------------------------------|---------|---------------------|
| Subgroup | Trial   | n (%)                          | N   | n (%)                           | N   | Adjusted RR                      | p-value | interaction p-value |
|          | NeOProM | 91 (38.4)                      | 237 | 110 (41.8)                      | 263 | 0.89 (0.72, 1.11)                | 0.335   |                     |

\* Analysis adjusted for trials and multiple births

**Abbreviations/definitions**

CI: confidence interval; RR: relative risk; GA: gestational age; SUPPORT: Surfactant Positive Airway Pressure and Pulse Oximetry Trial; COT: Canadian Oxygen Trial; BOOST: Benefits of Oxygen Saturation Targeting; NZ: New Zealand; UK: United Kingdom; AUS: Australia; NeOProM: Neonatal Oxygenation Prospective Meta-analysis; inborn: born inside the treating center; outborn: born outside the treating center (e.g. transferred from another hospital); vaginal: mode of delivery through the vagina; Caesarean: mode of delivery via surgical procedure; ANS: antenatal corticosteroids; singleton: child born as a single birth; multiple: more than one child per birth; start<6 hrs: intervention commenced less than 6 hours after birth; start>=6 hrs: intervention commenced greater than or equal to 6 hours after birth; original software: original oximeter software; revised software: revised oximeter software; SGA: small for gestational age; SGA NeOProM defined: small for gestational age as per definition used by NeOProM collaboration, i.e. less than 10th percentile using charts from Kramer et al.<sup>1</sup>

The subgroup analysis by oximeter software type (original vs revised) excludes n=74 infants in COT who were exposed to both the original and revised software.

Empty cells (.) indicate data not collected or not applicable in this trial.

\*\*\* Low / no event rate(s) makes parameter not estimable.

**eTable 30. Supplemental oxygen# without positive airway pressure at 36 weeks, by subgroups**

|           |                | Lower Oxygen Saturation Target |             | Higher Oxygen Saturation Target |             | Adjusted* Relative Risk (95% CI) |                 |                     |
|-----------|----------------|--------------------------------|-------------|---------------------------------|-------------|----------------------------------|-----------------|---------------------|
| Subgroup  | Trial          | n (%)                          | N           | n (%)                           | N           | Adjusted RR                      | p-value         | interaction p-value |
| GA<26 wks | SUPPORT        | 19 (10.6)                      | 180         | 29 (13.9)                       | 208         | 0.74 (0.43, 1.29)                | 0.291           | 0.878               |
|           | COT            | 81 (48.2)                      | 168         | 107 (65.6)                      | 163         | 0.75 (0.62, 0.91)                | 0.003           |                     |
|           | BOOST NZ       | 13 (22.8)                      | 57          | 20 (32.8)                       | 61          | 0.69 (0.40, 1.18)                | 0.175           |                     |
|           | BOOST II UK    | 68 (50.7)                      | 134         | 68 (45.3)                       | 150         | 1.10 (0.86, 1.41)                | 0.448           |                     |
|           | BOOST II AUS   | 48 (27.0)                      | 178         | 71 (37.2)                       | 191         | 0.73 (0.54, 0.98)                | 0.038           |                     |
|           | <b>NeOProM</b> | <b>229 (31.9)</b>              | <b>717</b>  | <b>295 (38.2)</b>               | <b>773</b>  | <b>0.82 (0.72, 0.93)</b>         | <b>0.002</b>    |                     |
| GA≥26 wks | SUPPORT        | 31 (11.4)                      | 271         | 35 (12.5)                       | 280         | 0.88 (0.54, 1.41)                | 0.583           |                     |
|           | COT            | 75 (32.9)                      | 228         | 85 (37.9)                       | 224         | 0.90 (0.72, 1.12)                | 0.328           |                     |
|           | BOOST NZ       | 10 (10.4)                      | 96          | 17 (19.5)                       | 87          | 0.56 (0.28, 1.15)                | 0.116           |                     |
|           | BOOST II UK    | 58 (24.7)                      | 235         | 79 (32.5)                       | 243         | 0.74 (0.56, 0.98)                | 0.034           |                     |
|           | BOOST II AUS   | 56 (18.7)                      | 299         | 67 (22.1)                       | 303         | 0.86 (0.64, 1.15)                | 0.306           |                     |
|           | <b>NeOProM</b> | <b>230 (20.4)</b>              | <b>1129</b> | <b>283 (24.9)</b>               | <b>1137</b> | <b>0.81 (0.70, 0.93)</b>         | <b>0.003</b>    |                     |
| Inborn    | SUPPORT        | 50 (11.1)                      | 451         | 64 (13.1)                       | 488         | 0.81 (0.57, 1.17)                | 0.261           | 0.814               |
|           | COT            | 146 (39.1)                     | 373         | 173 (48.2)                      | 359         | 0.84 (0.72, 0.98)                | 0.027           |                     |
|           | BOOST NZ       | 21 (14.7)                      | 143         | 34 (24.6)                       | 138         | 0.60 (0.37, 0.98)                | 0.040           |                     |
|           | BOOST II UK    | 110 (33.8)                     | 325         | 129 (37.2)                      | 347         | 0.88 (0.72, 1.07)                | 0.197           |                     |
|           | BOOST II AUS   | 96 (21.7)                      | 442         | 131 (28.1)                      | 466         | 0.78 (0.63, 0.97)                | 0.026           |                     |
|           | <b>NeOProM</b> | <b>423 (24.4)</b>              | <b>1734</b> | <b>531 (29.5)</b>               | <b>1798</b> | <b>0.82 (0.74, 0.90)</b>         | <b>&lt;.001</b> |                     |
| Outborn   | SUPPORT        |                                | .           |                                 | .           |                                  | .               |                     |
|           | COT            | 10 (43.5)                      | 23          | 19 (67.9)                       | 28          | 0.64 (0.38, 1.09)                | 0.100           |                     |
|           | BOOST NZ       | 2 (20.0)                       | 10          | 3 (30.0)                        | 10          | 0.65 (0.16, 2.61)                | 0.540           |                     |
|           | BOOST II UK    | 16 (36.4)                      | 44          | 18 (39.1)                       | 46          | 0.93 (0.56, 1.55)                | 0.778           |                     |
|           | BOOST II AUS   | 8 (22.9)                       | 35          | 7 (25.0)                        | 28          | 1.01 (0.45, 2.27)                | 0.976           |                     |
|           | <b>NeOProM</b> | <b>36 (32.1)</b>               | <b>112</b>  | <b>47 (42.0)</b>                | <b>112</b>  | <b>0.78 (0.57, 1.08)</b>         | <b>0.131</b>    |                     |
| Vaginal   | SUPPORT        | 10 (7.1)                       | 141         | 19 (12.3)                       | 154         | 0.57 (0.28, 1.19)                | 0.137           | 0.524               |
|           | COT            | 53 (38.7)                      | 137         | 75 (51.7)                       | 145         | 0.78 (0.62, 0.97)                | 0.027           |                     |
|           | BOOST NZ       | 8 (12.9)                       | 62          | 17 (26.2)                       | 65          | 0.51 (0.26, 1.00)                | 0.050           |                     |
|           | BOOST II UK    | 88 (41.5)                      | 212         | 91 (39.6)                       | 230         | 1.00 (0.80, 1.25)                | 0.973           |                     |
|           | BOOST II AUS   | 50 (22.4)                      | 223         | 56 (25.6)                       | 219         | 0.87 (0.63, 1.21)                | 0.403           |                     |
|           | <b>NeOProM</b> | <b>209 (27.0)</b>              | <b>775</b>  | <b>258 (31.7)</b>               | <b>813</b>  | <b>0.85 (0.74, 0.98)</b>         | <b>0.024</b>    |                     |
| Caesarean | SUPPORT        | 40 (12.9)                      | 310         | 45 (13.5)                       | 334         | 0.93 (0.61, 1.40)                | 0.714           |                     |
|           | COT            | 102 (39.5)                     | 258         | 116 (48.1)                      | 241         | 0.84 (0.70, 1.02)                | 0.077           |                     |
|           | BOOST NZ       | 15 (16.5)                      | 91          | 20 (24.1)                       | 83          | 0.72 (0.40, 1.30)                | 0.274           |                     |
|           | BOOST II UK    | 38 (24.2)                      | 157         | 56 (34.4)                       | 163         | 0.71 (0.50, 0.99)                | 0.042           |                     |
|           | BOOST II AUS   | 54 (21.3)                      | 253         | 82 (30.1)                       | 272         | 0.75 (0.57, 0.99)                | 0.043           |                     |
|           | <b>NeOProM</b> | <b>249 (23.3)</b>              | <b>1069</b> | <b>319 (29.2)</b>               | <b>1093</b> | <b>0.79 (0.69, 0.90)</b>         | <b>&lt;.001</b> |                     |
| ANS - No  | SUPPORT        | 0                              | 19          | 4 (16.7)                        | 24          |                                  | ***             | 0.251               |
|           | COT            | 18 (47.4)                      | 38          | 26 (65.0)                       | 40          | 1.71 (0.59, 4.96)                | 0.320           |                     |
|           | BOOST NZ       | 2 (12.5)                       | 16          | 4 (30.8)                        | 13          | 0.42 (0.11, 1.69)                | 0.223           |                     |
|           | BOOST II UK    | 10 (37.0)                      | 27          | 14 (48.3)                       | 29          | 0.33 (0.06, 1.80)                | 0.199           |                     |

eTable 30. Supplemental oxygen# without positive airway pressure at 36 weeks, by subgroups (continued)

|             |                | Lower Oxygen Saturation Target |             | Higher Oxygen Saturation Target |             | Adjusted* Relative Risk (95% CI) |                 |                     |
|-------------|----------------|--------------------------------|-------------|---------------------------------|-------------|----------------------------------|-----------------|---------------------|
| Subgroup    | Trial          | n (%)                          | N           | n (%)                           | N           | Adjusted RR                      | p-value         | interaction p-value |
|             | BOOST II AUS   | 11 (21.2)                      | 52          | 10 (32.3)                       | 31          | 0.68 (0.32, 1.42)                | 0.301           |                     |
|             | <b>NeOProM</b> | <b>41 (27.0)</b>               | <b>152</b>  | <b>58 (42.3)</b>                | <b>137</b>  | <b>0.73 (0.54, 1.00)</b>         | <b>0.047</b>    |                     |
| ANS - Yes   | SUPPORT        | 50 (11.6)                      | 432         | 60 (12.9)                       | 464         | 0.86 (0.60, 1.24)                | 0.424           |                     |
|             | COT            | 137 (38.4)                     | 357         | 166 (47.8)                      | 347         | 0.83 (0.71, 0.97)                | 0.018           |                     |
|             | BOOST NZ       | 21 (15.3)                      | 137         | 33 (24.4)                       | 135         | 0.63 (0.39, 1.03)                | 0.066           |                     |
|             | BOOST II UK    | 116 (34.1)                     | 340         | 133 (36.7)                      | 362         | 0.90 (0.74, 1.09)                | 0.263           |                     |
|             | BOOST II AUS   | 92 (21.7)                      | 423         | 126 (27.5)                      | 458         | 0.80 (0.64, 1.00)                | 0.049           |                     |
|             | <b>NeOProM</b> | <b>416 (24.6)</b>              | <b>1689</b> | <b>518 (29.3)</b>               | <b>1766</b> | <b>0.83 (0.75, 0.91)</b>         | <b>&lt;.001</b> |                     |
| Male        | SUPPORT        | 31 (13.1)                      | 236         | 37 (13.4)                       | 277         | 0.95 (0.60, 1.51)                | 0.836           | 0.213               |
|             | COT            | 89 (42.4)                      | 210         | 102 (50.5)                      | 202         | 0.90 (0.74, 1.09)                | 0.289           |                     |
|             | BOOST NZ       | 13 (16.7)                      | 78          | 22 (27.5)                       | 80          | 0.61 (0.34, 1.11)                | 0.104           |                     |
|             | BOOST II UK    | 68 (35.2)                      | 193         | 80 (37.9)                       | 211         | 0.90 (0.70, 1.17)                | 0.434           |                     |
|             | BOOST II AUS   | 55 (23.4)                      | 235         | 72 (28.6)                       | 252         | 0.83 (0.62, 1.12)                | 0.218           |                     |
|             | <b>NeOProM</b> | <b>256 (26.9)</b>              | <b>952</b>  | <b>313 (30.6)</b>               | <b>1022</b> | <b>0.86 (0.76, 0.98)</b>         | <b>0.025</b>    |                     |
| Female      | SUPPORT        | 19 (8.8)                       | 215         | 27 (12.8)                       | 211         | 0.61 (0.34, 1.10)                | 0.102           |                     |
|             | COT            | 67 (36.0)                      | 186         | 90 (48.6)                       | 185         | 0.74 (0.59, 0.93)                | 0.010           |                     |
|             | BOOST NZ       | 10 (13.3)                      | 75          | 15 (22.1)                       | 68          | 0.62 (0.29, 1.29)                | 0.199           |                     |
|             | BOOST II UK    | 58 (33.0)                      | 176         | 67 (36.8)                       | 182         | 0.89 (0.68, 1.17)                | 0.419           |                     |
|             | BOOST II AUS   | 49 (20.2)                      | 242         | 66 (27.3)                       | 242         | 0.74 (0.54, 1.01)                | 0.056           |                     |
|             | <b>NeOProM</b> | <b>203 (22.7)</b>              | <b>894</b>  | <b>265 (29.8)</b>               | <b>888</b>  | <b>0.76 (0.66, 0.88)</b>         | <b>&lt;.001</b> |                     |
| Singleton   | SUPPORT        | 28 (8.2)                       | 340         | 47 (13.1)                       | 360         | 0.63 (0.40, 0.98)                | 0.042           | 0.074               |
|             | COT            | 103 (39.5)                     | 261         | 140 (53.0)                      | 264         | 0.74 (0.62, 0.90)                | 0.002           |                     |
|             | BOOST NZ       | 20 (17.9)                      | 112         | 30 (27.3)                       | 110         | 0.65 (0.40, 1.08)                | 0.098           |                     |
|             | BOOST II UK    | 93 (35.8)                      | 260         | 114 (40.0)                      | 285         | 0.89 (0.72, 1.11)                | 0.311           |                     |
|             | BOOST II AUS   | 72 (20.1)                      | 358         | 103 (27.3)                      | 377         | 0.74 (0.57, 0.96)                | 0.023           |                     |
|             | <b>NeOProM</b> | <b>316 (23.7)</b>              | <b>1331</b> | <b>434 (31.1)</b>               | <b>1396</b> | <b>0.77 (0.68, 0.86)</b>         | <b>&lt;.001</b> |                     |
| Multiple    | SUPPORT        | 22 (19.8)                      | 111         | 17 (13.3)                       | 128         | 1.52 (0.81, 2.85)                | 0.192           |                     |
|             | COT            | 53 (39.3)                      | 135         | 52 (42.3)                       | 123         | 0.98 (0.77, 1.25)                | 0.865           |                     |
|             | BOOST NZ       | 3 (7.3)                        | 41          | 7 (18.4)                        | 38          | 0.47 (0.14, 1.59)                | 0.222           |                     |
|             | BOOST II UK    | 33 (30.3)                      | 109         | 33 (30.6)                       | 108         | 0.87 (0.60, 1.28)                | 0.482           |                     |
|             | BOOST II AUS   | 32 (26.9)                      | 119         | 35 (29.9)                       | 117         | 0.91 (0.65, 1.27)                | 0.574           |                     |
|             | <b>NeOProM</b> | <b>143 (27.8)</b>              | <b>515</b>  | <b>144 (28.0)</b>               | <b>514</b>  | <b>0.94 (0.79, 1.11)</b>         | <b>0.437</b>    |                     |
| start<6 hrs | SUPPORT        | 50 (11.3)                      | 443         | 63 (13.1)                       | 480         | 0.83 (0.58, 1.19)                | 0.308           | 0.889               |
|             | COT            | 6 (27.3)                       | 22          | 11 (57.9)                       | 19          | 0.51 (0.25, 1.04)                | 0.063           |                     |
|             | BOOST NZ       | 5 (20.0)                       | 25          | 4 (14.8)                        | 27          | 1.37 (0.40, 4.68)                | 0.612           |                     |
|             | BOOST II UK    |                                | .           |                                 | .           |                                  | .               |                     |
|             | BOOST II AUS   | 11 (22.9)                      | 48          | 17 (30.9)                       | 55          | 1.81 (0.44, 7.42)                | 0.408           |                     |
|             | <b>NeOProM</b> | <b>72 (13.4)</b>               | <b>538</b>  | <b>95 (16.4)</b>                | <b>581</b>  | <b>0.78 (0.59, 1.03)</b>         | <b>0.080</b>    |                     |
| >=6 hrs     | SUPPORT        | 0                              | 4           | 1 (33.3)                        | 3           |                                  | ***             |                     |
|             | COT            | 150 (40.1)                     | 374         | 181 (49.2)                      | 368         | 0.85 (0.73, 0.98)                | 0.030           |                     |
|             | BOOST NZ       | 18 (14.1)                      | 128         | 33 (27.3)                       | 121         | 0.52 (0.31, 0.86)                | 0.012           |                     |

eTable 30. Supplemental oxygen# without positive airway pressure at 36 weeks, by subgroups (continued)

|                            |                | Lower Oxygen Saturation Target |             | Higher Oxygen Saturation Target |             | Adjusted* Relative Risk (95% CI) |                 |                     |
|----------------------------|----------------|--------------------------------|-------------|---------------------------------|-------------|----------------------------------|-----------------|---------------------|
| Subgroup                   | Trial          | n (%)                          | N           | n (%)                           | N           | Adjusted RR                      | p-value         | interaction p-value |
|                            | BOOST II UK    |                                | .           |                                 | .           |                                  | .               |                     |
|                            | BOOST II AUS   | 93 (21.8)                      | 427         | 121 (27.6)                      | 439         | 0.79 (0.63, 0.99)                | 0.040           |                     |
|                            | <b>NeOProM</b> | <b>261 (28.0)</b>              | <b>933</b>  | <b>336 (36.1)</b>               | <b>931</b>  | <b>0.79 (0.70, 0.90)</b>         | <b>&lt;.001</b> |                     |
| Original software          | SUPPORT        | 50 (11.1)                      | 451         | 64 (13.1)                       | 488         | 0.81 (0.57, 1.17)                | 0.261           | 0.475               |
|                            | COT            | 75 (40.1)                      | 187         | 79 (44.6)                       | 177         | 0.93 (0.74, 1.17)                | 0.535           |                     |
|                            | BOOST NZ       | 23 (15.0)                      | 153         | 37 (25.0)                       | 148         | 0.60 (0.38, 0.96)                | 0.033           |                     |
|                            | BOOST II UK    | 38 (40.0)                      | 95          | 37 (42.0)                       | 88          | 0.92 (0.64, 1.30)                | 0.624           |                     |
|                            | BOOST II AUS   | 68 (23.0)                      | 296         | 83 (28.0)                       | 296         | 0.84 (0.65, 1.10)                | 0.206           |                     |
|                            | <b>NeOProM</b> | <b>254 (21.5)</b>              | <b>1182</b> | <b>300 (25.1)</b>               | <b>1197</b> | <b>0.85 (0.74, 0.97)</b>         | <b>0.020</b>    |                     |
| Revised software           | SUPPORT        |                                | .           |                                 | .           |                                  | .               |                     |
|                            | COT            | 71 (38.4)                      | 185         | 91 (50.6)                       | 180         | 0.78 (0.63, 0.96)                | 0.018           |                     |
|                            | BOOST NZ       |                                | .           |                                 | .           |                                  | .               |                     |
|                            | BOOST II UK    | 88 (32.1)                      | 274         | 110 (36.1)                      | 305         | 0.87 (0.70, 1.08)                | 0.214           |                     |
|                            | BOOST II AUS   | 36 (19.9)                      | 181         | 55 (27.8)                       | 198         | 0.67 (0.46, 0.95)                | 0.027           |                     |
|                            | <b>NeOProM</b> | <b>195 (30.5)</b>              | <b>640</b>  | <b>256 (37.5)</b>               | <b>683</b>  | <b>0.79 (0.69, 0.91)</b>         | <b>0.001</b>    |                     |
| SGA: Trialist defined - No | SUPPORT        | 48 (11.2)                      | 429         | 57 (12.8)                       | 447         | 0.85 (0.59, 1.24)                | 0.404           | 0.005               |
|                            | COT            | 143 (39.6)                     | 361         | 168 (47.5)                      | 354         | 0.86 (0.73, 1.00)                | 0.052           |                     |
|                            | BOOST II NZ    | 21 (15.4)                      | 136         | 34 (24.8)                       | 137         | 0.63 (0.39, 1.02)                | 0.062           |                     |
|                            | BOOST II UK    | 114 (36.8)                     | 310         | 122 (36.7)                      | 332         | 0.97 (0.80, 1.18)                | 0.745           |                     |
|                            | BOOST II AUS   | 90 (21.6)                      | 416         | 115 (26.9)                      | 427         | 0.81 (0.64, 1.02)                | 0.071           |                     |
|                            | <b>NeOProM</b> | <b>416 (25.2)</b>              | <b>1652</b> | <b>496 (29.2)</b>               | <b>1697</b> | <b>0.86 (0.77, 0.95)</b>         | <b>0.003</b>    |                     |
| Yes                        | SUPPORT        | 2 (9.1)                        | 22          | 7 (17.1)                        | 41          | 0.28 (0.07, 1.13)                | 0.074           |                     |
|                            | COT            | 13 (37.1)                      | 35          | 24 (72.7)                       | 33          | 0.62 (0.42, 0.92)                | 0.019           |                     |
|                            | BOOST II NZ    | 2 (11.8)                       | 17          | 3 (27.3)                        | 11          | 0.26 (0.07, 0.97)                | 0.045           |                     |
|                            | BOOST II UK    | 12 (20.7)                      | 58          | 24 (40.0)                       | 60          | 0.53 (0.29, 0.94)                | 0.030           |                     |
|                            | BOOST II AUS   | 14 (23.0)                      | 61          | 23 (34.3)                       | 67          | 0.69 (0.40, 1.19)                | 0.184           |                     |
|                            | <b>NeOProM</b> | <b>43 (22.3)</b>               | <b>193</b>  | <b>81 (38.2)</b>                | <b>212</b>  | <b>0.55 (0.41, 0.75)</b>         | <b>0.0001</b>   |                     |
| SGA: NeOProM defined - No  | SUPPORT        | 42 (10.9)                      | 387         | 51 (12.8)                       | 398         | 0.83 (0.57, 1.23)                | 0.360           | 0.023               |
|                            | COT            | 143 (39.6)                     | 361         | 168 (47.5)                      | 354         | 0.86 (0.73, 1.00)                | 0.052           |                     |
|                            | BOOST II NZ    | 21 (15.4)                      | 136         | 34 (24.8)                       | 137         | 0.63 (0.39, 1.02)                | 0.062           |                     |
|                            | BOOST II UK    | 119 (36.5)                     | 326         | 133 (38.1)                      | 349         | 0.94 (0.77, 1.13)                | 0.496           |                     |
|                            | BOOST II AUS   | 90 (21.6)                      | 416         | 115 (26.9)                      | 427         | 0.81 (0.64, 1.02)                | 0.071           |                     |
|                            | <b>NeOProM</b> | <b>415 (25.5)</b>              | <b>1626</b> | <b>501 (30.1)</b>               | <b>1665</b> | <b>0.85 (0.77, 0.94)</b>         | <b>0.001</b>    |                     |
| Yes                        | SUPPORT        | 8 (12.5)                       | 64          | 13 (14.4)                       | 90          | 0.79 (0.33, 1.86)                | 0.584           |                     |
|                            | COT            | 13 (37.1)                      | 35          | 24 (72.7)                       | 33          | 0.62 (0.42, 0.92)                | 0.019           |                     |
|                            | BOOST II NZ    | 2 (11.8)                       | 17          | 3 (27.3)                        | 11          | 0.26 (0.07, 0.97)                | 0.045           |                     |
|                            | BOOST II UK    | 7 (16.3)                       | 43          | 14 (31.8)                       | 44          | 0.52 (0.24, 1.15)                | 0.105           |                     |
|                            | BOOST II AUS   | 14 (23.0)                      | 61          | 23 (34.3)                       | 67          | 0.69 (0.40, 1.19)                | 0.184           |                     |
|                            | <b>NeOProM</b> | <b>44 (20.0)</b>               | <b>220</b>  | <b>77 (31.4)</b>                | <b>245</b>  | <b>0.60 (0.44, 0.82)</b>         | <b>0.001</b>    |                     |

# SUPPORT and UK trials used a physiologic test to determine need for supplemental oxygen whilst the other trials did not.

\* Analysis adjusted for trials and multiple births

### **Abbreviations/definitions**

CI: confidence interval; RR: relative risk; GA: gestational age; SUPPORT: Surfactant Positive Airway Pressure and Pulse Oximetry Trial; COT: Canadian Oxygen Trial; BOOST: Benefits of Oxygen Saturation Targeting; NZ: New Zealand; UK: United Kingdom; AUS: Australia; NeOProM: Neonatal Oxygenation Prospective Meta-analysis; inborn: born inside the treating center; outborn: born outside the treating center (e.g. transferred from another hospital); vaginal: mode of delivery through the vagina; Caesarean: mode of delivery via surgical procedure; ANS: antenatal corticosteroids; singleton: child born as a single birth; multiple: more than one child per birth; start<6 hrs: intervention commenced less than 6 hours after birth; start>=6 hrs: intervention commenced greater than or equal to 6 hours after birth; original software: original oximeter software; revised software: revised oximeter software; SGA: small for gestational age; SGA NeOProM defined: small for gestational age as per definition used by NeOProM collaboration, i.e. less than 10th percentile using charts from Kramer et al.<sup>1</sup>

The subgroup analysis by oximeter software type (original vs revised) excludes n=74 infants in COT who were exposed to both the original and revised software.

Empty cells (.) indicate data not collected or not applicable in this trial.

\*\*\* Low / no event rate(s) makes parameter not estimable.

eTable 31. Discharged home on oxygen, by subgroups

|           |                | Lower Oxygen Saturation Target |             | Higher Oxygen Saturation Target |             | Adjusted* Relative Risk (95% CI) |              |                     |
|-----------|----------------|--------------------------------|-------------|---------------------------------|-------------|----------------------------------|--------------|---------------------|
| Subgroup  | Trial          | n (%)                          | N           | n (%)                           | N           | Adjusted RR                      | p-value      | interaction p-value |
| GA<26 wks | SUPPORT        | 58 (30.7)                      | 189         | 70 (32.9)                       | 213         | 0.93 (0.70, 1.25)                | 0.643        | 0.907               |
|           | COT            | 49 (25.3)                      | 194         | 40 (21.2)                       | 189         | 1.18 (0.82, 1.71)                | 0.364        |                     |
|           | BOOST NZ       | 13 (18.1)                      | 72          | 23 (31.9)                       | 72          | 0.58 (0.32, 1.04)                | 0.067        |                     |
|           | BOOST II UK    | 72 (53.7)                      | 134         | 68 (45.3)                       | 150         | 1.19 (0.93, 1.51)                | 0.161        |                     |
|           | BOOST II AUS   | 48 (20.0)                      | 240         | 55 (22.9)                       | 240         | 0.85 (0.60, 1.21)                | 0.375        |                     |
|           | <b>NeOProM</b> | <b>240 (29.0)</b>              | <b>829</b>  | <b>256 (29.6)</b>               | <b>864</b>  | <b>1.01 (0.88, 1.17)</b>         | <b>0.848</b> |                     |
| GA≥26 wks | SUPPORT        | 60 (18.1)                      | 331         | 58 (17.3)                       | 336         | 1.06 (0.76, 1.47)                | 0.738        |                     |
|           | COT            | 31 (9.9)                       | 313         | 28 (8.7)                        | 323         | 1.19 (0.75, 1.87)                | 0.464        |                     |
|           | BOOST NZ       | 21 (21.4)                      | 98          | 18 (18.4)                       | 98          | 1.16 (0.65, 2.05)                | 0.613        |                     |
|           | BOOST II UK    | 69 (29.4)                      | 235         | 70 (29.5)                       | 237         | 0.97 (0.74, 1.27)                | 0.804        |                     |
|           | BOOST II AUS   | 34 (10.5)                      | 324         | 36 (11.0)                       | 327         | 0.94 (0.61, 1.47)                | 0.796        |                     |
|           | <b>NeOProM</b> | <b>215 (16.5)</b>              | <b>1301</b> | <b>210 (15.9)</b>               | <b>1321</b> | <b>1.03 (0.87, 1.21)</b>         | <b>0.756</b> |                     |
| Inborn    | SUPPORT        | 118 (22.7)                     | 520         | 128 (23.3)                      | 549         | 0.98 (0.78, 1.22)                | 0.857        | 0.169               |
|           | COT            | 70 (14.8)                      | 473         | 59 (12.6)                       | 467         | 1.17 (0.85, 1.59)                | 0.331        |                     |
|           | BOOST NZ       | 32 (20.1)                      | 159         | 40 (25.5)                       | 157         | 0.79 (0.52, 1.19)                | 0.259        |                     |
|           | BOOST II UK    | 128 (39.4)                     | 325         | 126 (37.1)                      | 340         | 1.03 (0.86, 1.24)                | 0.735        |                     |
|           | BOOST II AUS   | 75 (14.4)                      | 520         | 88 (16.8)                       | 525         | 0.86 (0.65, 1.15)                | 0.306        |                     |
|           | <b>NeOProM</b> | <b>423 (21.2)</b>              | <b>1997</b> | <b>441 (21.6)</b>               | <b>2038</b> | <b>0.99 (0.88, 1.11)</b>         | <b>0.836</b> |                     |
| Outborn   | SUPPORT        | .                              | .           | .                               | .           | .                                | .            |                     |
|           | COT            | 10 (29.4)                      | 34          | 9 (20.0)                        | 45          | 2.43 (0.39, 15.2)                | 0.343        |                     |
|           | BOOST NZ       | 2 (18.2)                       | 11          | 1 (7.7)                         | 13          | 2.31 (0.25, 21.2)                | 0.458        |                     |
|           | BOOST II UK    | 13 (29.5)                      | 44          | 12 (25.5)                       | 47          | 1.16 (0.59, 2.30)                | 0.669        |                     |
|           | BOOST II AUS   | 7 (15.9)                       | 44          | 3 (7.1)                         | 42          | 2.03 (0.59, 7.06)                | 0.263        |                     |
|           | <b>NeOProM</b> | <b>32 (24.1)</b>               | <b>133</b>  | <b>25 (17.0)</b>                | <b>147</b>  | <b>1.42 (0.90, 2.25)</b>         | <b>0.134</b> |                     |
| Vaginal   | SUPPORT        | 35 (21.0)                      | 167         | 34 (18.4)                       | 185         | 1.14 (0.75, 1.74)                | 0.544        | 0.193               |
|           | COT            | 28 (15.1)                      | 186         | 30 (14.5)                       | 207         | 1.04 (0.65, 1.66)                | 0.884        |                     |
|           | BOOST NZ       | 12 (16.0)                      | 75          | 15 (19.0)                       | 79          | 0.82 (0.41, 1.63)                | 0.566        |                     |
|           | BOOST II UK    | 85 (40.1)                      | 212         | 81 (35.2)                       | 230         | 1.10 (0.88, 1.38)                | 0.411        |                     |
|           | BOOST II AUS   | 41 (15.1)                      | 271         | 35 (13.6)                       | 257         | 1.10 (0.73, 1.67)                | 0.638        |                     |
|           | <b>NeOProM</b> | <b>201 (22.1)</b>              | <b>911</b>  | <b>195 (20.4)</b>               | <b>958</b>  | <b>1.10 (0.93, 1.30)</b>         | <b>0.273</b> |                     |
| Caesarean | SUPPORT        | 83 (23.5)                      | 353         | 94 (25.8)                       | 364         | 0.93 (0.72, 1.20)                | 0.574        |                     |
|           | COT            | 52 (16.3)                      | 320         | 38 (12.5)                       | 304         | 1.30 (0.90, 1.88)                | 0.164        |                     |
|           | BOOST NZ       | 22 (23.2)                      | 95          | 26 (28.6)                       | 91          | 0.80 (0.49, 1.31)                | 0.386        |                     |
|           | BOOST II UK    | 56 (35.7)                      | 157         | 57 (36.3)                       | 157         | 0.97 (0.73, 1.29)                | 0.832        |                     |
|           | BOOST II AUS   | 41 (14.0)                      | 292         | 56 (18.3)                       | 306         | 0.77 (0.53, 1.12)                | 0.178        |                     |
|           | <b>NeOProM</b> | <b>254 (20.9)</b>              | <b>1217</b> | <b>271 (22.2)</b>               | <b>1222</b> | <b>0.95 (0.82, 1.10)</b>         | <b>0.455</b> |                     |
| ANS - No  | SUPPORT        | 0                              | 18          | 3 (12.0)                        | 25          |                                  | ***          | 0.885               |
|           | COT            | 7 (14.6)                       | 48          | 9 (19.1)                        | 47          | 0.77 (0.34, 1.76)                | 0.537        |                     |
|           | BOOST NZ       | 3 (15.0)                       | 20          | 3 (16.7)                        | 18          | 0.83 (0.18, 3.79)                | 0.814        |                     |
|           | BOOST II UK    | 13 (48.1)                      | 27          | 9 (30.0)                        | 30          | 1.60 (0.82, 3.14)                | 0.567        |                     |

eTable 31. Discharged home on oxygen, by subgroups (continued)

|             |                | Lower Oxygen Saturation Target |             | Higher Oxygen Saturation Target |             | Adjusted* Relative Risk (95% CI) |              |                     |
|-------------|----------------|--------------------------------|-------------|---------------------------------|-------------|----------------------------------|--------------|---------------------|
| Subgroup    | Trial          | n (%)                          | N           | n (%)                           | N           | Adjusted RR                      | p-value      | interaction p-value |
|             | BOOST II AUS   | 6 (9.5)                        | 63          | 6 (14.3)                        | 42          | 0.66 (0.23, 1.94)                | 0.452        |                     |
|             | <b>NeOProM</b> | <b>29 (16.5)</b>               | <b>176</b>  | <b>30 (18.5)</b>                | <b>162</b>  | <b>1.00 (0.64, 1.55)</b>         | <b>0.993</b> |                     |
| ANS - Yes   | SUPPORT        | 118 (23.5)                     | 502         | 125 (23.9)                      | 524         | 0.99 (0.80, 1.24)                | 0.957        |                     |
|             | COT            | 72 (15.7)                      | 458         | 59 (12.7)                       | 465         | 1.24 (0.91, 1.68)                | 0.178        |                     |
|             | BOOST NZ       | 31 (20.7)                      | 150         | 38 (25.0)                       | 152         | 0.83 (0.54, 1.26)                | 0.375        |                     |
|             | BOOST II UK    | 128 (37.5)                     | 341         | 127 (35.8)                      | 355         | 1.03 (0.85, 1.24)                | 0.767        |                     |
|             | BOOST II AUS   | 74 (14.8)                      | 499         | 84 (16.2)                       | 519         | 0.92 (0.68, 1.23)                | 0.560        |                     |
|             | <b>NeOProM</b> | <b>423 (21.7)</b>              | <b>1950</b> | <b>433 (21.5)</b>               | <b>2015</b> | <b>1.01 (0.90, 1.13)</b>         | <b>0.852</b> |                     |
| Male        | SUPPORT        | 68 (26.3)                      | 259         | 69 (22.9)                       | 301         | 1.16 (0.86, 1.56)                | 0.336        | 0.536               |
|             | COT            | 44 (16.0)                      | 275         | 36 (13.5)                       | 267         | 1.19 (0.80, 1.77)                | 0.397        |                     |
|             | BOOST NZ       | 17 (18.9)                      | 90          | 28 (31.1)                       | 90          | 0.60 (0.36, 1.01)                | 0.054        |                     |
|             | BOOST II UK    | 75 (39.1)                      | 192         | 78 (38.2)                       | 204         | 1.01 (0.80, 1.29)                | 0.905        |                     |
|             | BOOST II AUS   | 49 (16.8)                      | 292         | 47 (15.9)                       | 296         | 1.06 (0.73, 1.54)                | 0.770        |                     |
|             | <b>NeOProM</b> | <b>253 (22.8)</b>              | <b>1108</b> | <b>258 (22.3)</b>               | <b>1158</b> | <b>1.04 (0.89, 1.20)</b>         | <b>0.638</b> |                     |
| Female      | SUPPORT        | 50 (19.2)                      | 261         | 59 (23.8)                       | 248         | 0.80 (0.57, 1.11)                | 0.185        |                     |
|             | COT            | 36 (15.5)                      | 232         | 32 (13.1)                       | 245         | 1.17 (0.76, 1.80)                | 0.475        |                     |
|             | BOOST NZ       | 17 (21.3)                      | 80          | 13 (16.3)                       | 80          | 1.31 (0.68, 2.52)                | 0.417        |                     |
|             | BOOST II UK    | 66 (37.3)                      | 177         | 60 (32.8)                       | 183         | 1.09 (0.83, 1.43)                | 0.533        |                     |
|             | BOOST II AUS   | 33 (12.1)                      | 272         | 44 (16.2)                       | 271         | 0.74 (0.48, 1.13)                | 0.163        |                     |
|             | <b>NeOProM</b> | <b>202 (19.8)</b>              | <b>1022</b> | <b>208 (20.3)</b>               | <b>1027</b> | <b>0.98 (0.83, 1.16)</b>         | <b>0.783</b> |                     |
| Singleton   | SUPPORT        | 93 (23.9)                      | 389         | 102 (24.6)                      | 414         | 0.97 (0.76, 1.24)                | 0.809        | 0.790               |
|             | COT            | 56 (16.5)                      | 339         | 48 (13.4)                       | 358         | 1.23 (0.86, 1.76)                | 0.250        |                     |
|             | BOOST NZ       | 26 (21.0)                      | 124         | 30 (24.2)                       | 124         | 0.87 (0.55, 1.38)                | 0.544        |                     |
|             | BOOST II UK    | 103 (39.6)                     | 260         | 105 (37.5)                      | 280         | 1.06 (0.85, 1.31)                | 0.614        |                     |
|             | BOOST II AUS   | 64 (15.0)                      | 426         | 75 (17.4)                       | 432         | 0.87 (0.64, 1.17)                | 0.354        |                     |
|             | <b>NeOProM</b> | <b>342 (22.2)</b>              | <b>1538</b> | <b>360 (22.4)</b>               | <b>1608</b> | <b>1.00 (0.88, 1.14)</b>         | <b>0.974</b> |                     |
| Multiple    | SUPPORT        | 25 (19.1)                      | 131         | 26 (19.3)                       | 135         | 1.03 (0.60, 1.75)                | 0.916        |                     |
|             | COT            | 24 (14.3)                      | 168         | 20 (13.0)                       | 154         | 1.10 (0.67, 1.80)                | 0.701        |                     |
|             | BOOST NZ       | 8 (17.4)                       | 46          | 11 (23.9)                       | 46          | 0.73 (0.32, 1.66)                | 0.449        |                     |
|             | BOOST II UK    | 38 (34.9)                      | 109         | 33 (30.8)                       | 107         | 1.02 (0.72, 1.45)                | 0.900        |                     |
|             | BOOST II AUS   | 18 (13.0)                      | 138         | 16 (11.9)                       | 135         | 1.10 (0.55, 2.19)                | 0.784        |                     |
|             | <b>NeOProM</b> | <b>113 (19.1)</b>              | <b>592</b>  | <b>106 (18.4)</b>               | <b>577</b>  | <b>1.04 (0.82, 1.31)</b>         | <b>0.752</b> |                     |
| start<6 hrs | SUPPORT        | 115 (22.6)                     | 509         | 126 (23.4)                      | 539         | 0.97 (0.78, 1.22)                | 0.804        | 0.872               |
|             | COT            | 4 (16.7)                       | 24          | 5 (21.7)                        | 23          | 0.78 (0.25, 2.48)                | 0.674        |                     |
|             | BOOST NZ       | 8 (28.6)                       | 28          | 5 (17.9)                        | 28          | 1.30 (0.53, 3.16)                | 0.565        |                     |
|             | BOOST II UK    |                                | .           |                                 | .           |                                  | .            |                     |
|             | BOOST II AUS   | 10 (17.5)                      | 57          | 13 (21.7)                       | 60          | 0.83 (0.39, 1.74)                | 0.618        |                     |
|             | <b>NeOProM</b> | <b>137 (22.2)</b>              | <b>618</b>  | <b>149 (22.9)</b>               | <b>650</b>  | <b>0.97 (0.79, 1.19)</b>         | <b>0.756</b> |                     |
| >=6 hrs     | SUPPORT        | 2 (40.0)                       | 5           | 1 (25.0)                        | 4           | 1.60 (0.21, 11.9)                | 0.646        |                     |
|             | COT            | 76 (15.7)                      | 483         | 63 (12.9)                       | 489         | 1.22 (0.90, 1.65)                | 0.195        |                     |
|             | BOOST NZ       | 26 (18.3)                      | 142         | 36 (25.5)                       | 141         | 0.71 (0.45, 1.13)                | 0.150        |                     |



eTable 31. Discharged home on oxygen, by subgroups (continued)

|           |                | Lower Oxygen Saturation Target |             | Higher Oxygen Saturation Target |             | Adjusted* Relative Risk (95% CI) |              |                     |
|-----------|----------------|--------------------------------|-------------|---------------------------------|-------------|----------------------------------|--------------|---------------------|
| Subgroup  | Trial          | n (%)                          | N           | n (%)                           | N           | Adjusted RR                      | p-value      | interaction p-value |
|           | BOOST II UK    |                                | .           |                                 | .           |                                  | .            |                     |
|           | BOOST II AUS   | 72 (14.3)                      | 505         | 78 (15.4)                       | 506         | 0.93 (0.69, 1.25)                | 0.620        |                     |
|           | <b>NeOProM</b> | <b>176 (15.5)</b>              | <b>1135</b> | <b>178 (15.6)</b>               | <b>1140</b> | <b>0.99 (0.82, 1.20)</b>         | <b>0.907</b> |                     |
| Original  | SUPPORT        | 118 (22.7)                     | 520         | 128 (23.3)                      | 549         | 0.98 (0.78, 1.22)                | 0.857        | 0.465               |
| software  | COT            | 43 (18.1)                      | 238         | 29 (12.6)                       | 230         | 1.46 (0.96, 2.23)                | 0.077        |                     |
|           | BOOST NZ       | 34 (20.0)                      | 170         | 41 (24.1)                       | 170         | 0.83 (0.55, 1.24)                | 0.364        |                     |
|           | BOOST II UK    | 34 (36.6)                      | 93          | 33 (38.8)                       | 85          | 0.98 (0.69, 1.37)                | 0.887        |                     |
|           | BOOST II AUS   | 45 (13.1)                      | 344         | 53 (15.3)                       | 346         | 0.86 (0.59, 1.25)                | 0.427        |                     |
|           | <b>NeOProM</b> | <b>274 (20.1)</b>              | <b>1365</b> | <b>284 (20.6)</b>               | <b>1380</b> | <b>0.98 (0.85, 1.13)</b>         | <b>0.771</b> |                     |
| Revised   | SUPPORT        |                                | .           |                                 | .           |                                  | .            |                     |
| software  | COT            | 33 (13.8)                      | 239         | 32 (13.2)                       | 242         | 1.02 (0.66, 1.58)                | 0.924        |                     |
|           | BOOST NZ       |                                | .           |                                 | .           |                                  | .            |                     |
|           | BOOST II UK    | 107 (38.8)                     | 276         | 105 (34.8)                      | 302         | 1.07 (0.87, 1.32)                | 0.502        |                     |
|           | BOOST II AUS   | 37 (16.8)                      | 220         | 38 (17.2)                       | 221         | 0.98 (0.64, 1.49)                | 0.915        |                     |
|           | <b>NeOProM</b> | <b>177 (24.1)</b>              | <b>735</b>  | <b>175 (22.9)</b>               | <b>765</b>  | <b>1.06 (0.90, 1.27)</b>         | <b>0.481</b> |                     |
| SGA:      | SUPPORT        | 110 (21.9)                     | 502         | 108 (21.2)                      | 509         | 1.04 (0.82, 1.32)                | 0.747        | 0.357               |
| Trialist  | COT            | 69 (14.8)                      | 467         | 60 (12.6)                       | 475         | 1.16 (0.85, 1.59)                | 0.346        |                     |
| defined - | BOOST II NZ    | 27 (17.6)                      | 153         | 33 (21.0)                       | 157         | 0.84 (0.53, 1.33)                | 0.453        |                     |
| No        | BOOST II UK    | 115 (36.7)                     | 313         | 108 (32.6)                      | 331         | 1.12 (0.91, 1.37)                | 0.280        |                     |
|           | BOOST II AUS   | 63 (13.0)                      | 485         | 74 (15.1)                       | 489         | 0.86 (0.62, 1.18)                | 0.336        |                     |
|           | <b>NeOProM</b> | <b>384 (20.0)</b>              | <b>1920</b> | <b>383 (19.5)</b>               | <b>1961</b> | <b>1.03 (0.91, 1.17)</b>         | <b>0.598</b> |                     |
| Yes       | SUPPORT        | 8 (44.4)                       | 18          | 20 (50.0)                       | 40          | 0.89 (0.52, 1.51)                | 0.664        |                     |
|           | COT            | 11 (27.5)                      | 40          | 8 (21.6)                        | 37          | 1.27 (0.58, 2.81)                | 0.674        |                     |
|           | BOOST II NZ    | 7 (41.2)                       | 17          | 8 (61.5)                        | 13          | 0.70 (0.33, 1.46)                | 0.338        |                     |
|           | BOOST II UK    | 26 (47.3)                      | 55          | 29 (52.7)                       | 55          | 0.88 (0.60, 1.29)                | 0.503        |                     |
|           | BOOST II AUS   | 19 (24.1)                      | 79          | 17 (21.8)                       | 78          | 1.12 (0.63, 1.99)                | 0.696        |                     |
|           | <b>NeOProM</b> | <b>71 (34.0)</b>               | <b>209</b>  | <b>82 (36.8)</b>                | <b>223</b>  | <b>0.96 (0.74, 1.23)</b>         | <b>0.724</b> |                     |
| SGA:      | SUPPORT        | 99 (21.7)                      | 456         | 95 (20.6)                       | 462         | 1.07 (0.83, 1.38)                | 0.609        | 0.640               |
| NeOProM   | COT            | 69 (14.8)                      | 467         | 60 (12.6)                       | 475         | 1.16 (0.85, 1.59)                | 0.346        |                     |
| defined - | BOOST II NZ    | 27 (17.6)                      | 153         | 33 (21.0)                       | 157         | 0.84 (0.53, 1.33)                | 0.453        |                     |
| No        | BOOST II UK    | 119 (36.2)                     | 329         | 118 (33.9)                      | 348         | 1.06 (0.87, 1.29)                | 0.572        |                     |
|           | BOOST II AUS   | 63 (13.0)                      | 485         | 74 (15.1)                       | 489         | 0.86 (0.62, 1.18)                | 0.336        |                     |
|           | <b>NeOProM</b> | <b>377 (19.9)</b>              | <b>1890</b> | <b>380 (19.7)</b>               | <b>1931</b> | <b>1.02 (0.90, 1.16)</b>         | <b>0.744</b> |                     |
| Yes       | SUPPORT        | 19 (29.7)                      | 64          | 33 (37.9)                       | 87          | 0.79 (0.50, 1.25)                | 0.312        |                     |
|           | COT            | 11 (27.5)                      | 40          | 8 (21.6)                        | 37          | 1.00 (1.00, 1.00)                | 0.674        |                     |
|           | BOOST II NZ    | 7 (41.2)                       | 17          | 8 (61.5)                        | 13          | 0.70 (0.33, 1.46)                | 0.338        |                     |
|           | BOOST II UK    | 22 (55.0)                      | 40          | 20 (51.3)                       | 39          | 1.05 (0.69, 1.60)                | 0.813        |                     |
|           | BOOST II AUS   | 19 (24.1)                      | 79          | 17 (21.8)                       | 78          | 1.12 (0.63, 1.99)                | 0.696        |                     |
|           | <b>NeOProM</b> | <b>78 (32.5)</b>               | <b>240</b>  | <b>86 (33.9)</b>                | <b>254</b>  | <b>0.96 (0.75, 1.22)</b>         | <b>0.721</b> |                     |

\* Analysis adjusted for trials and multiple births

## Abbreviations/definitions

CI: confidence interval; RR: relative risk; GA: gestational age; SUPPORT: Surfactant Positive Airway Pressure and Pulse Oximetry Trial; COT: Canadian Oxygen Trial; BOOST: Benefits of Oxygen Saturation Targeting; NZ: New Zealand; UK: United Kingdom; AUS: Australia; NeOProM: Neonatal Oxygenation Prospective Meta-analysis; inborn: born inside the treating center; outborn: born outside the treating center (e.g. transferred from another hospital); vaginal: mode of delivery through the vagina; Caesarean: mode of delivery via surgical procedure; ANS: antenatal corticosteroids; singleton: child born as a single birth; multiple: more than one child per birth; start<6 hrs: intervention commenced less than 6 hours after birth; start>=6 hrs: intervention commenced greater than or equal to 6 hours after birth; original software: original oximeter software; revised software: revised oximeter software; SGA: small for gestational age; SGA NeOProM defined: small for gestational age as per definition used by NeOProM collaboration, i.e. less than 10th percentile using charts from Kramer et al.<sup>1</sup>

The subgroup analysis by oximeter software type (original vs revised) excludes n=74 infants in COT who were exposed to both the original and revised software.

Empty cells (.) indicate data not collected or not applicable in this trial.

\*\*\* Low / no event rate(s) makes parameter not estimable.

eTable 32. Re-admission to hospital, by subgroups

|           |                | Lower Oxygen Saturation Target |             | Higher Oxygen Saturation Target |             | Adjusted* Relative Risk (95% CI) |              |                     |
|-----------|----------------|--------------------------------|-------------|---------------------------------|-------------|----------------------------------|--------------|---------------------|
| Subgroup  | Trial          | n (%)                          | N           | n (%)                           | N           | Adjusted RR                      | p-value      | interaction p-value |
| GA<26 wks | SUPPORT        | 87 (50.3)                      | 173         | 111 (55.0)                      | 202         | 0.91 (0.75, 1.11)                | 0.358        | 0.242               |
|           | COT            | 102 (54.0)                     | 189         | 78 (42.6)                       | 183         | 1.24 (1.00, 1.54)                | 0.049        |                     |
|           | BOOST NZ       | 43 (86.0)                      | 50          | 39 (70.9)                       | 55          | 1.21 (0.98, 1.48)                | 0.071        |                     |
|           | BOOST II UK    | 62 (67.4)                      | 92          | 67 (67.0)                       | 100         | 1.03 (0.85, 1.23)                | 0.784        |                     |
|           | BOOST II AUS   | 100 (66.7)                     | 150         | 111 (67.3)                      | 165         | 1.00 (0.86, 1.16)                | 0.980        |                     |
|           | <b>NeOProM</b> | <b>394 (60.2)</b>              | <b>654</b>  | <b>406 (57.6)</b>               | <b>705</b>  | <b>1.06 (0.97, 1.15)</b>         | <b>0.180</b> |                     |
| GA≥26 wks | SUPPORT        | 123 (40.3)                     | 305         | 129 (41.0)                      | 315         | 0.98 (0.81, 1.19)                | 0.838        |                     |
|           | COT            | 119 (40.1)                     | 297         | 123 (40.6)                      | 303         | 0.99 (0.82, 1.19)                | 0.903        |                     |
|           | BOOST NZ       | 63 (70.8)                      | 89          | 57 (69.5)                       | 82          | 1.02 (0.86, 1.21)                | 0.835        |                     |
|           | BOOST II UK    | 100 (62.9)                     | 159         | 109 (67.7)                      | 161         | 0.93 (0.79, 1.09)                | 0.377        |                     |
|           | BOOST II AUS   | 143 (57.2)                     | 250         | 143 (56.5)                      | 253         | 1.02 (0.87, 1.18)                | 0.818        |                     |
|           | <b>NeOProM</b> | <b>548 (49.8)</b>              | <b>1100</b> | <b>561 (50.4)</b>               | <b>1114</b> | <b>0.99 (0.91, 1.07)</b>         | <b>0.723</b> |                     |
| Inborn    | SUPPORT        | 210 (43.9)                     | 478         | 240 (46.4)                      | 517         | 0.95 (0.82, 1.09)                | 0.430        | 0.769               |
|           | COT            | 204 (45.1)                     | 452         | 182 (41.1)                      | 443         | 1.09 (0.94, 1.26)                | 0.252        |                     |
|           | BOOST NZ       | 99 (76.7)                      | 129         | 91 (70.5)                       | 129         | 1.09 (0.95, 1.26)                | 0.200        |                     |
|           | BOOST II UK    | 141 (64.1)                     | 220         | 156 (69.0)                      | 226         | 0.93 (0.82, 1.06)                | 0.286        |                     |
|           | BOOST II AUS   | 227 (61.2)                     | 371         | 238 (60.3)                      | 395         | 1.02 (0.91, 1.14)                | 0.723        |                     |
|           | <b>NeOProM</b> | <b>881 (53.4)</b>              | <b>1650</b> | <b>907 (53.0)</b>               | <b>1710</b> | <b>1.01 (0.95, 1.07)</b>         | <b>0.714</b> |                     |
| Outborn   | SUPPORT        | .                              | .           | .                               | .           | .                                | .            |                     |
|           | COT            | 17 (50.0)                      | 34          | 19 (44.2)                       | 43          | 1.69 (0.69, 4.17)                | 0.253        |                     |
|           | BOOST NZ       | 7 (70.0)                       | 10          | 5 (62.5)                        | 8           | 1.12 (0.57, 2.20)                | 0.972        |                     |
|           | BOOST II UK    | 21 (67.7)                      | 31          | 20 (57.1)                       | 35          | 1.23 (0.86, 1.75)                | 0.264        |                     |
|           | BOOST II AUS   | 16 (55.2)                      | 29          | 16 (69.6)                       | 23          | 0.67 (0.34, 1.34)                | 0.260        |                     |
|           | <b>NeOProM</b> | <b>61 (58.7)</b>               | <b>104</b>  | <b>60 (55.0)</b>                | <b>109</b>  | <b>1.06 (0.85, 1.33)</b>         | <b>0.601</b> |                     |
| Vaginal   | SUPPORT        | 68 (46.3)                      | 147         | 82 (45.8)                       | 179         | 1.02 (0.80, 1.29)                | 0.885        | 0.664               |
|           | COT            | 79 (43.9)                      | 180         | 75 (38.3)                       | 196         | 1.13 (0.90, 1.43)                | 0.302        |                     |
|           | BOOST NZ       | 47 (82.5)                      | 57          | 44 (72.1)                       | 61          | 1.23 (0.84, 1.81)                | 0.290        |                     |
|           | BOOST II UK    | 90 (60.8)                      | 148         | 100 (65.4)                      | 153         | 0.94 (0.79, 1.12)                | 0.493        |                     |
|           | BOOST II AUS   | 117 (60.9)                     | 192         | 110 (59.8)                      | 184         | 1.02 (0.86, 1.20)                | 0.844        |                     |
|           | <b>NeOProM</b> | <b>401 (55.4)</b>              | <b>724</b>  | <b>411 (53.2)</b>               | <b>773</b>  | <b>1.03 (0.95, 1.12)</b>         | <b>0.484</b> |                     |
| Caesarean | SUPPORT        | 142 (42.9)                     | 331         | 158 (46.7)                      | 338         | 0.91 (0.77, 1.08)                | 0.298        |                     |
|           | COT            | 142 (46.4)                     | 306         | 126 (43.6)                      | 289         | 1.06 (0.89, 1.26)                | 0.491        |                     |
|           | BOOST NZ       | 59 (72.0)                      | 82          | 52 (68.4)                       | 76          | 1.06 (0.87, 1.28)                | 0.580        |                     |
|           | BOOST II UK    | 72 (69.9)                      | 103         | 76 (70.4)                       | 108         | 1.00 (0.84, 1.18)                | 0.968        |                     |
|           | BOOST II AUS   | 125 (60.4)                     | 207         | 143 (61.9)                      | 231         | 1.02 (0.88, 1.18)                | 0.805        |                     |
|           | <b>NeOProM</b> | <b>540 (52.5)</b>              | <b>1029</b> | <b>555 (53.3)</b>               | <b>1042</b> | <b>1.00 (0.93, 1.08)</b>         | <b>0.925</b> |                     |
| ANS - No  | SUPPORT        | 9 (52.9)                       | 17          | 11 (45.8)                       | 24          | 1.24 (0.63, 2.41)                | 0.535        | 0.609               |
|           | COT            | 23 (50.0)                      | 46          | 22 (51.2)                       | 43          | 0.61 (0.26, 1.47)                | 0.271        |                     |
|           | BOOST NZ       | 14 (87.5)                      | 16          | 8 (72.7)                        | 11          | 1.20 (0.82, 1.77)                | 0.349        |                     |
|           | BOOST II UK    | 14 (73.7)                      | 19          | 14 (63.6)                       | 22          | 1.19 (0.80, 1.76)                | 0.397        |                     |

eTable 32. Re-admission to hospital, by subgroups (continued)

|             |                | Lower Oxygen Saturation Target |             | Higher Oxygen Saturation Target |             | Adjusted* Relative Risk (95% CI) |              |                     |
|-------------|----------------|--------------------------------|-------------|---------------------------------|-------------|----------------------------------|--------------|---------------------|
| Subgroup    | Trial          | n (%)                          | N           | n (%)                           | N           | Adjusted RR                      | p-value      | interaction p-value |
|             | BOOST II AUS   | 20 (47.6)                      | 42          | 17 (70.8)                       | 24          | 0.67 (0.44, 1.04)                | 0.072        |                     |
|             | <b>NeOProM</b> | <b>80 (57.1)</b>               | <b>140</b>  | <b>72 (58.1)</b>                | <b>124</b>  | <b>0.99 (0.82, 1.21)</b>         | <b>0.940</b> |                     |
| ANS - Yes   | SUPPORT        | 201 (43.6)                     | 461         | 229 (46.5)                      | 493         | 0.93 (0.81, 1.08)                | 0.353        |                     |
|             | COT            | 198 (45.1)                     | 439         | 179 (40.4)                      | 443         | 1.11 (0.96, 1.29)                | 0.167        |                     |
|             | BOOST NZ       | 92 (74.8)                      | 123         | 88 (69.8)                       | 126         | 1.08 (0.93, 1.24)                | 0.326        |                     |
|             | BOOST II UK    | 147 (63.6)                     | 231         | 160 (67.5)                      | 237         | 0.95 (0.83, 1.08)                | 0.420        |                     |
|             | BOOST II AUS   | 221 (62.1)                     | 356         | 234 (60.2)                      | 389         | 1.04 (0.93, 1.16)                | 0.503        |                     |
|             | <b>NeOProM</b> | <b>859 (53.4)</b>              | <b>1610</b> | <b>890 (52.7)</b>               | <b>1688</b> | <b>1.02 (0.96, 1.08)</b>         | <b>0.575</b> |                     |
| Male        | SUPPORT        | 114 (47.5)                     | 240         | 144 (50.3)                      | 286         | 0.90 (0.76, 1.08)                | 0.272        | 0.286               |
|             | COT            | 131 (48.9)                     | 268         | 105 (41.8)                      | 251         | 1.15 (0.96, 1.38)                | 0.141        |                     |
|             | BOOST NZ       | 55 (78.6)                      | 70          | 60 (82.2)                       | 73          | 0.95 (0.83, 1.08)                | 0.419        |                     |
|             | BOOST II UK    | 95 (73.1)                      | 130         | 96 (70.1)                       | 137         | 1.04 (0.90, 1.21)                | 0.580        |                     |
|             | BOOST II AUS   | 138 (68.3)                     | 202         | 129 (62.0)                      | 208         | 1.09 (0.95, 1.26)                | 0.209        |                     |
|             | <b>NeOProM</b> | <b>533 (58.6)</b>              | <b>910</b>  | <b>534 (55.9)</b>               | <b>955</b>  | <b>1.03 (0.96, 1.10)</b>         | <b>0.437</b> |                     |
| Female      | SUPPORT        | 96 (40.3)                      | 238         | 96 (41.6)                       | 231         | 0.98 (0.79, 1.22)                | 0.885        |                     |
|             | COT            | 90 (41.3)                      | 218         | 96 (40.9)                       | 235         | 1.00 (0.81, 1.25)                | 0.975        |                     |
|             | BOOST NZ       | 51 (73.9)                      | 69          | 36 (56.3)                       | 64          | 1.35 (1.04, 1.74)                | 0.022        |                     |
|             | BOOST II UK    | 67 (55.4)                      | 121         | 80 (64.5)                       | 124         | 0.86 (0.70, 1.06)                | 0.166        |                     |
|             | BOOST II AUS   | 105 (53.0)                     | 198         | 125 (59.5)                      | 210         | 0.89 (0.75, 1.06)                | 0.200        |                     |
|             | <b>NeOProM</b> | <b>409 (48.5)</b>              | <b>844</b>  | <b>433 (50.1)</b>               | <b>864</b>  | <b>0.97 (0.88, 1.06)</b>         | <b>0.514</b> |                     |
| Singleton   | SUPPORT        | 170 (48.0)                     | 354         | 198 (51.2)                      | 387         | 0.94 (0.81, 1.09)                | 0.394        | 0.104               |
|             | COT            | 149 (45.7)                     | 326         | 146 (43.3)                      | 337         | 1.05 (0.89, 1.25)                | 0.537        |                     |
|             | BOOST NZ       | 79 (78.2)                      | 101         | 71 (70.3)                       | 101         | 1.11 (0.95, 1.31)                | 0.200        |                     |
|             | BOOST II UK    | 111 (62.7)                     | 177         | 129 (70.5)                      | 183         | 0.89 (0.77, 1.03)                | 0.120        |                     |
|             | BOOST II AUS   | 187 (62.3)                     | 300         | 202 (63.3)                      | 319         | 0.98 (0.87, 1.11)                | 0.799        |                     |
|             | <b>NeOProM</b> | <b>696 (55.3)</b>              | <b>1258</b> | <b>746 (56.2)</b>               | <b>1327</b> | <b>0.98 (0.92, 1.05)</b>         | <b>0.639</b> |                     |
| Multiple    | SUPPORT        | 40 (32.3)                      | 124         | 42 (32.3)                       | 130         | 1.00 (0.67, 1.50)                | 0.990        |                     |
|             | COT            | 72 (45.0)                      | 160         | 55 (36.9)                       | 149         | 1.18 (0.92, 1.51)                | 0.198        |                     |
|             | BOOST NZ       | 27 (71.1)                      | 38          | 25 (69.4)                       | 36          | 1.04 (0.82, 1.33)                | 0.724        |                     |
|             | BOOST II UK    | 51 (68.9)                      | 74          | 47 (60.3)                       | 78          | 1.14 (0.91, 1.44)                | 0.261        |                     |
|             | BOOST II AUS   | 56 (56.0)                      | 100         | 52 (52.5)                       | 99          | 1.07 (0.84, 1.37)                | 0.585        |                     |
|             | <b>NeOProM</b> | <b>246 (49.6)</b>              | <b>496</b>  | <b>221 (44.9)</b>               | <b>492</b>  | <b>1.10 (0.98, 1.24)</b>         | <b>0.108</b> |                     |
| start<6 hrs | SUPPORT        | 206 (44.1)                     | 467         | 236 (46.5)                      | 507         | 0.95 (0.82, 1.09)                | 0.434        | 0.175               |
|             | COT            | 10 (43.5)                      | 23          | 13 (61.9)                       | 21          | 0.70 (0.41, 1.21)                | 0.204        |                     |
|             | BOOST NZ       | 16 (72.7)                      | 22          | 14 (56.0)                       | 25          | 1.11 (0.94, 1.31)                | 0.234        |                     |
|             | BOOST II UK    |                                | .           |                                 | .           |                                  | .            |                     |
|             | BOOST II AUS   | 22 (57.9)                      | 38          | 34 (66.7)                       | 51          | 0.87 (0.62, 1.21)                | 0.403        |                     |
|             | <b>NeOProM</b> | <b>254 (46.2)</b>              | <b>550</b>  | <b>297 (49.2)</b>               | <b>604</b>  | <b>0.95 (0.84, 1.07)</b>         | <b>0.409</b> |                     |
| >=6 hrs     | SUPPORT        | 4 (80.0)                       | 5           | 1 (25.0)                        | 4           | 3.20 (0.55, 18.5)                | 0.193        |                     |
|             | COT            | 211 (45.6)                     | 463         | 188 (40.4)                      | 465         | 1.12 (0.97, 1.29)                | 0.130        |                     |
|             | BOOST NZ       | 90 (76.9)                      | 117         | 82 (73.2)                       | 112         | 1.06 (0.91, 1.22)                | 0.460        |                     |

eTable 32. Re-admission to hospital, by subgroups (continued)

|                            |                | Lower Oxygen Saturation Target |             | Higher Oxygen Saturation Target |             | Adjusted* Relative Risk (95% CI) |              |                     |
|----------------------------|----------------|--------------------------------|-------------|---------------------------------|-------------|----------------------------------|--------------|---------------------|
| Subgroup                   | Trial          | n (%)                          | N           | n (%)                           | N           | Adjusted RR                      | p-value      | interaction p-value |
|                            | BOOST II UK    |                                | .           |                                 | .           |                                  | .            |                     |
|                            | BOOST II AUS   | 220 (60.9)                     | 361         | 220 (59.9)                      | 367         | 1.02 (0.91, 1.14)                | 0.764        |                     |
|                            | <b>NeOProM</b> | <b>525 (55.5)</b>              | <b>946</b>  | <b>491 (51.8)</b>               | <b>948</b>  | <b>1.06 (0.98, 1.14)</b>         | <b>0.144</b> |                     |
| Original software          | SUPPORT        | 210 (43.9)                     | 478         | 240 (46.4)                      | 517         | 0.95 (0.82, 1.09)                | 0.430        | 0.449               |
|                            | COT            | 112 (48.7)                     | 230         | 95 (43.6)                       | 218         | 1.14 (0.94, 1.38)                | 0.185        |                     |
|                            | BOOST NZ       | 106 (76.3)                     | 139         | 96 (70.1)                       | 137         | 1.09 (0.95, 1.25)                | 0.210        |                     |
|                            | BOOST II UK    | 40 (63.5)                      | 63          | 44 (78.6)                       | 56          | 0.83 (0.69, 1.00)                | 0.055        |                     |
|                            | BOOST II AUS   | 150 (61.0)                     | 246         | 162 (61.6)                      | 263         | 1.00 (0.87, 1.15)                | 0.995        |                     |
|                            | <b>NeOProM</b> | <b>618 (53.5)</b>              | <b>1156</b> | <b>637 (53.5)</b>               | <b>1191</b> | <b>1.01 (0.94, 1.08)</b>         | <b>0.828</b> |                     |
| Revised software           | SUPPORT        |                                | .           |                                 | .           |                                  | .            |                     |
|                            | COT            | 103 (45.4)                     | 227         | 85 (36.8)                       | 231         | 1.22 (0.98, 1.52)                | 0.071        |                     |
|                            | BOOST NZ       |                                | .           |                                 | .           |                                  | .            |                     |
|                            | BOOST II UK    | 122 (64.9)                     | 188         | 132 (64.4)                      | 205         | 1.01 (0.87, 1.17)                | 0.903        |                     |
|                            | BOOST II AUS   | 93 (60.4)                      | 154         | 92 (59.4)                       | 155         | 1.02 (0.85, 1.22)                | 0.852        |                     |
|                            | <b>NeOProM</b> | <b>318 (55.9)</b>              | <b>569</b>  | <b>309 (52.3)</b>               | <b>591</b>  | <b>1.05 (0.95, 1.16)</b>         | <b>0.309</b> |                     |
| SGA: Trialist defined - No | SUPPORT        | 204 (44.3)                     | 461         | 222 (46.3)                      | 479         | 0.95 (0.82, 1.10)                | 0.476        | 0.526               |
|                            | COT            | 201 (45.1)                     | 446         | 182 (40.4)                      | 450         | 1.11 (0.96, 1.29)                | 0.157        |                     |
|                            | BOOST II NZ    | 94 (75.8)                      | 124         | 89 (69.0)                       | 129         | 1.10 (0.95, 1.28)                | 0.211        |                     |
|                            | BOOST II UK    | 134 (63.2)                     | 212         | 146 (66.4)                      | 220         | 0.96 (0.84, 1.10)                | 0.566        |                     |
|                            | BOOST II AUS   | 208 (59.4)                     | 350         | 214 (59.3)                      | 361         | 1.01 (0.90, 1.14)                | 0.858        |                     |
|                            | <b>NeOProM</b> | <b>841 (52.8)</b>              | <b>1593</b> | <b>853 (52.0)</b>               | <b>1639</b> | <b>1.02 (0.96, 1.09)</b>         | <b>0.495</b> |                     |
| Yes                        | SUPPORT        | 6 (35.3)                       | 17          | 18 (47.4)                       | 38          | 0.77 (0.37, 1.60)                | 0.480        |                     |
|                            | COT            | 20 (50.0)                      | 40          | 19 (52.8)                       | 36          | 0.98 (0.86, 1.13)                | 0.805        |                     |
|                            | BOOST II NZ    | 12 (80.0)                      | 15          | 7 (87.5)                        | 8           | 0.92 (0.63, 1.33)                | 0.654        |                     |
|                            | BOOST II UK    | 28 (71.8)                      | 39          | 29 (72.5)                       | 40          | 0.98 (0.75, 1.30)                | 0.912        |                     |
|                            | BOOST II AUS   | 35 (70.0)                      | 50          | 40 (70.2)                       | 57          | 1.00 (0.78, 1.28)                | 0.984        |                     |
|                            | <b>NeOProM</b> | <b>101 (62.7)</b>              | <b>161</b>  | <b>113 (63.1)</b>               | <b>179</b>  | <b>0.96 (0.83, 1.12)</b>         | <b>0.633</b> |                     |
| SGA: NeOProM defined - No  | SUPPORT        | 180 (43.2)                     | 417         | 200 (45.7)                      | 438         | 0.94 (0.81, 1.09)                | 0.423        | 0.535               |
|                            | COT            | 201 (45.1)                     | 446         | 182 (40.4)                      | 450         | 1.11 (0.96, 1.29)                | 0.157        |                     |
|                            | BOOST II NZ    | 94 (75.8)                      | 124         | 89 (69.0)                       | 129         | 1.10 (0.95, 1.28)                | 0.211        |                     |
|                            | BOOST II UK    | 140 (63.1)                     | 222         | 152 (66.1)                      | 230         | 0.96 (0.84, 1.10)                | 0.581        |                     |
|                            | BOOST II AUS   | 208 (59.4)                     | 350         | 214 (59.3)                      | 361         | 1.01 (0.90, 1.14)                | 0.858        |                     |
|                            | <b>NeOProM</b> | <b>823 (52.8)</b>              | <b>1559</b> | <b>837 (52.1)</b>               | <b>1608</b> | <b>1.02 (0.96, 1.09)</b>         | <b>0.513</b> |                     |
| Yes                        | SUPPORT        | 30 (49.2)                      | 61          | 40 (50.6)                       | 79          | 0.97 (0.70, 1.36)                | 0.879        |                     |
|                            | COT            | 20 (50.0)                      | 40          | 19 (52.8)                       | 36          | 0.98 (0.86, 1.13)                | 0.805        |                     |
|                            | BOOST II NZ    | 12 (80.0)                      | 15          | 7 (87.5)                        | 8           | 0.92 (0.63, 1.33)                | 0.654        |                     |
|                            | BOOST II UK    | 22 (75.9)                      | 29          | 24 (77.4)                       | 31          | 0.97 (0.73, 1.29)                | 0.859        |                     |
|                            | BOOST II AUS   | 35 (70.0)                      | 50          | 40 (70.2)                       | 57          | 1.00 (0.78, 1.28)                | 0.984        |                     |
|                            | <b>NeOProM</b> | <b>119 (61.0)</b>              | <b>195</b>  | <b>130 (61.6)</b>               | <b>211</b>  | <b>0.97 (0.84, 1.13)</b>         | <b>0.714</b> |                     |

\* Analysis adjusted for trials and multiple births

## Abbreviations/definitions

CI: confidence interval; RR: relative risk; GA: gestational age; SUPPORT: Surfactant Positive Airway Pressure and Pulse Oximetry Trial; COT: Canadian Oxygen Trial; BOOST: Benefits of Oxygen Saturation Targeting; NZ: New Zealand; UK: United Kingdom; AUS: Australia; NeOProM: Neonatal Oxygenation Prospective Meta-analysis; inborn: born inside the treating center; outborn: born outside the treating center (e.g. transferred from another hospital); vaginal: mode of delivery through the vagina; Caesarean: mode of delivery via surgical procedure; ANS: antenatal corticosteroids; singleton: child born as a single birth; multiple: more than one child per birth; start<6 hrs: intervention commenced less than 6 hours after birth; start>=6 hrs: intervention commenced greater than or equal to 6 hours after birth; original software: original oximeter software; revised software: revised oximeter software; SGA: small for gestational age; SGA NeOProM defined: small for gestational age as per definition used by NeOProM collaboration, i.e. less than 10th percentile using charts from Kramer et al.<sup>1</sup>

The subgroup analysis by oximeter software type (original vs revised) excludes n=74 infants in COT who were exposed to both the original and revised software.

Empty cells (.) indicate data not collected or not applicable in this trial.

## Post-hoc subgroup analyses

**eTable 33. Outcomes, by SUPPORT-defined small for gestational age (SGA) subgroups**

Using the same definition of SGA as the SUPPORT analysis,<sup>8</sup> i.e. the Alexander curves.<sup>9</sup>

### Footnotes for all the data in Table W33:

\* Analysis adjusted for trials and multiple births

### Abbreviations/definitions

CI: confidence interval; RR: relative risk; SGA: small for gestational age; SUPPORT: Surfactant Positive Airway Pressure and Pulse Oximetry Trial; COT: Canadian Oxygen Trial; BOOST: Benefits of Oxygen Saturation Targeting; NZ: New Zealand; UK: United Kingdom; AUS: Australia; NeOProM: Neonatal Oxygenation Prospective Meta-analysis.

The subgroup analysis by oximeter software type (original vs revised) excludes n=74 infants in COT who were exposed to both the original and revised software.

Empty cells (.) indicate data not collected or not applicable in this trial.

\*\*\* Low / no event rate(s) makes parameter not estimable.

### Death or disability (primary analysis)<sup>^</sup>

| Subgroup | Trial          | Lower Oxygen Saturation Target |             | Higher Oxygen Saturation Target |             | Adjusted* Relative Risk (95% CI) |              |                     |
|----------|----------------|--------------------------------|-------------|---------------------------------|-------------|----------------------------------|--------------|---------------------|
|          |                | n (%)                          | N           | n (%)                           | N           | Adjusted RR                      | p-value      | interaction p-value |
| SGA      | SUPPORT        | 330 (57.6)                     | 573         | 333 (58.4)                      | 570         | 0.99 (0.89, 1.09)                | 0.803        | 0.671               |
| SUPPORT  | COT            | 273 (50.7)                     | 538         | 260 (48.6)                      | 535         | 1.02 (0.91, 1.14)                | 0.757        |                     |
| Defined  | BOOST II NZ    | 56 (42.4)                      | 132         | 67 (48.9)                       | 137         | 0.87 (0.68, 1.13)                | 0.302        |                     |
| No       | BOOST II UK    | 211 (59.3)                     | 356         | 190 (54.0)                      | 352         | 1.11 (0.98, 1.26)                | 0.100        |                     |
|          | BOOST II AUS   | 203 (44.8)                     | 453         | 187 (40.8)                      | 458         | 1.09 (0.94, 1.26)                | 0.250        |                     |
|          | <b>NeOProM</b> | <b>1073 (52.3)</b>             | <b>2052</b> | <b>1037 (50.5)</b>              | <b>2052</b> | <b>1.03 (0.97, 1.09)</b>         | <b>0.290</b> |                     |
| Yes      | SUPPORT        | 33 (82.5)                      | 40          | 41 (75.9)                       | 54          | 1.09 (0.88, 1.34)                | 0.420        |                     |
|          | COT            | 25 (64.1)                      | 39          | 22 (66.7)                       | 33          | 0.96 (0.69, 1.35)                | 0.819        |                     |
|          | BOOST II NZ    | 6 (54.5)                       | 11          | 4 (57.1)                        | 7           | 0.95 (0.41, 2.21)                | 0.913        |                     |
|          | BOOST II UK    | 20 (62.5)                      | 32          | 21 (63.6)                       | 33          | 1.00 (0.68, 1.46)                | 0.997        |                     |
|          | BOOST II AUS   | 34 (63.0)                      | 54          | 25 (50.0)                       | 50          | 1.25 (0.90, 1.72)                | 0.184        |                     |
|          | <b>NeOProM</b> | <b>118 (67.0)</b>              | <b>176</b>  | <b>113 (63.8)</b>               | <b>177</b>  | <b>1.07 (0.93, 1.24)</b>         | <b>0.348</b> |                     |

<sup>^</sup> **Primary outcome as pre-specified in published NeOProM protocol:** composite outcome of death or major disability by 18-24 months' age, corrected for prematurity. Major disability is any of the following: Bayley-III Developmental Assessment cognitive score <85 and/or language score <85; severe visual loss; cerebral palsy with Gross Motor Function Classification System (GMFCS) level 2 or higher at 18-24 months' age, corrected for prematurity; or deafness requiring hearing aids.

### Death or disability (supportive)#

| Subgroup | Trial          | Lower Oxygen Saturation Target |             | Higher Oxygen Saturation Target |             | Adjusted* Relative Risk (95% CI) |              |                     |
|----------|----------------|--------------------------------|-------------|---------------------------------|-------------|----------------------------------|--------------|---------------------|
|          |                | n (%)                          | N           | n (%)                           | N           | Adjusted RR                      | p-value      | interaction p-value |
| SGA      | SUPPORT        | 331 (57.7)                     | 574         | 333 (58.4)                      | 570         | 0.99 (0.89, 1.09)                | 0.824        | 0.900               |
| SUPPORT  | COT            | 273 (50.7)                     | 538         | 261 (48.7)                      | 536         | 1.02 (0.91, 1.14)                | 0.779        |                     |
| Defined  | BOOST II NZ    | 59 (37.8)                      | 156         | 70 (43.5)                       | 161         | 0.87 (0.67, 1.12)                | 0.276        |                     |
| No       | BOOST II UK    | 222 (51.5)                     | 431         | 197 (45.8)                      | 430         | 1.13 (0.99, 1.29)                | 0.071        |                     |
|          | BOOST II AUS   | 211 (43.1)                     | 489         | 192 (39.2)                      | 490         | 1.10 (0.95, 1.27)                | 0.211        |                     |
|          | <b>NeOProM</b> | <b>1096 (50.1)</b>             | <b>2188</b> | <b>1053 (48.1)</b>              | <b>2187</b> | <b>1.03 (0.98, 1.10)</b>         | <b>0.254</b> |                     |
| Yes      | SUPPORT        | 33 (82.5)                      | 40          | 41 (75.9)                       | 54          | 1.09 (0.88, 1.34)                | 0.420        |                     |
|          | COT            | 25 (62.5)                      | 40          | 22 (66.7)                       | 33          | 0.94 (0.67, 1.32)                | 0.710        |                     |
|          | BOOST II NZ    | 6 (54.5)                       | 11          | 4 (57.1)                        | 7           | 0.95 (0.41, 2.21)                | 0.913        |                     |
|          | BOOST II UK    | 23 (54.8)                      | 42          | 23 (60.5)                       | 38          | 0.91 (0.62, 1.33)                | 0.619        |                     |
|          | BOOST II AUS   | 34 (61.8)                      | 55          | 25 (50.0)                       | 50          | 1.22 (0.88, 1.69)                | 0.224        |                     |
|          | <b>NeOProM</b> | <b>121 (64.4)</b>              | <b>188</b>  | <b>115 (63.2)</b>               | <b>182</b>  | <b>1.05 (0.91, 1.21)</b>         | <b>0.504</b> |                     |

# **Supportive analysis of primary outcome:** including using alternative sources of information for classifying major disability as used within individual trials. This may have included a Bayley-II Mental Developmental Index (MDI) score <70, or another validated assessment tool (e.g. Griffiths test), or a paediatrician assessment, or parent-reported measure of neurodevelopmental impairment (e.g. able to speak less than 5-10 words) or other measures.

### Death or disability (secondary)\*

| Subgroup | Trial          | Lower Oxygen Saturation Target |             | Higher Oxygen Saturation Target |             | Adjusted* Relative Risk (95% CI) |              |                     |
|----------|----------------|--------------------------------|-------------|---------------------------------|-------------|----------------------------------|--------------|---------------------|
|          |                | n (%)                          | N           | n (%)                           | N           | Adjusted RR                      | p-value      | interaction p-value |
| SGA      | SUPPORT        | 187 (32.6)                     | 573         | 189 (33.2)                      | 570         | 0.99 (0.83, 1.17)                | 0.867        | 0.995               |
| SUPPORT  | COT            | 163 (31.5)                     | 517         | 152 (29.3)                      | 519         | 1.04 (0.87, 1.25)                | 0.644        |                     |
| Defined  | BOOST II NZ    | 32 (24.2)                      | 132         | 35 (25.9)                       | 135         | 0.93 (0.62, 1.38)                | 0.705        |                     |
| No       | BOOST II UK    | 177 (49.9)                     | 355         | 154 (44.0)                      | 350         | 1.13 (0.97, 1.32)                | 0.125        |                     |
|          | BOOST II AUS   | 136 (30.2)                     | 451         | 126 (27.6)                      | 456         | 1.08 (0.88, 1.32)                | 0.481        |                     |
|          | <b>NeOProM</b> | <b>695 (34.3)</b>              | <b>2028</b> | <b>656 (32.3)</b>               | <b>2030</b> | <b>1.05 (0.97, 1.15)</b>         | <b>0.220</b> |                     |
| Yes      | SUPPORT        | 30 (75.0)                      | 40          | 33 (61.1)                       | 54          | 1.20 (0.91, 1.59)                | 0.186        |                     |
|          | COT            | 17 (43.6)                      | 39          | 15 (46.9)                       | 32          | 0.93 (0.56, 1.55)                | 0.781        |                     |
|          | BOOST II NZ    | 3 (27.3)                       | 11          | 4 (57.1)                        | 7           | 0.48 (0.15, 1.52)                | 0.211        |                     |
|          | BOOST II UK    | 17 (53.1)                      | 32          | 17 (51.5)                       | 33          | 1.04 (0.65, 1.68)                | 0.868        |                     |
|          | BOOST II AUS   | 22 (40.7)                      | 54          | 18 (36.0)                       | 50          | 1.13 (0.69, 1.85)                | 0.726        |                     |
|          | <b>NeOProM</b> | <b>89 (50.6)</b>               | <b>176</b>  | <b>87 (49.4)</b>                | <b>176</b>  | <b>1.01 (0.87, 1.31)</b>         | <b>0.530</b> |                     |

+ **Secondary analysis:** composite outcome of death or major disability by 18-24 months' age, corrected for prematurity. Major disability is any of the following: Bayley-III Developmental Assessment cognitive score <70 and/or language score <70; severe visual loss; cerebral palsy with Gross Motor Function Classification System (GMFCS) level 2 or higher at 18-24 months' age, corrected for prematurity; or deafness requiring hearing aids.



### Death or disability (trialist defined)<sup>~</sup>

| Subgroup | Trial          | Lower Oxygen Saturation Target |             | Higher Oxygen Saturation Target |             | Adjusted* Relative Risk (95% CI) |              |                     |
|----------|----------------|--------------------------------|-------------|---------------------------------|-------------|----------------------------------|--------------|---------------------|
|          |                | n (%)                          | N           | n (%)                           | N           | Adjusted RR                      | p-value      | interaction p-value |
| SGA      | SUPPORT        | 156 (27.3)                     | 572         | 146 (25.7)                      | 568         | 1.07 (0.87, 1.30)                | 0.527        | 0.978               |
| SUPPORT  | COT            | 273 (50.7)                     | 538         | 261 (48.7)                      | 536         | 1.02 (0.91, 1.14)                | 0.779        |                     |
| Defined  | BOOST II NZ    | 59 (37.8)                      | 156         | 72 (44.7)                       | 161         | 0.85 (0.66, 1.09)                | 0.205        |                     |
| No       | BOOST II UK    | 222 (51.5)                     | 431         | 197 (45.8)                      | 430         | 1.13 (0.99, 1.29)                | 0.071        |                     |
|          | BOOST II AUS   | 212 (43.0)                     | 493         | 192 (38.9)                      | 494         | 1.10 (0.95, 1.27)                | 0.196        |                     |
|          | <b>NeOProM</b> | <b>922 (42.1)</b>              | <b>2190</b> | <b>868 (39.7)</b>               | <b>2189</b> | <b>1.06 (0.99, 1.13)</b>         | <b>0.100</b> |                     |
| Yes      | SUPPORT        | 29 (72.5)                      | 40          | 25 (46.3)                       | 54          | 1.54 (1.09, 2.17)                | 0.014        |                     |
|          | COT            | 25 (62.5)                      | 40          | 22 (66.7)                       | 33          | 0.94 (0.67, 1.32)                | 0.710        |                     |
|          | BOOST II NZ    | 6 (54.5)                       | 11          | 4 (57.1)                        | 7           | 0.95 (0.41, 2.21)                | 0.913        |                     |
|          | BOOST II UK    | 23 (54.8)                      | 42          | 23 (60.5)                       | 38          | 0.91 (0.62, 1.33)                | 0.619        |                     |
|          | BOOST II AUS   | 34 (61.8)                      | 55          | 25 (49.0)                       | 51          | 1.24 (0.90, 1.72)                | 0.187        |                     |
|          | <b>NeOProM</b> | <b>117 (62.2)</b>              | <b>188</b>  | <b>99 (54.1)</b>                | <b>183</b>  | <b>1.14 (0.95, 1.35)</b>         | <b>0.153</b> |                     |

<sup>~</sup> Trialist defined analysis: primary outcome as defined by trialists - includes alternative measures of disability as described in 'supportive analysis of primary outcome'

### Major disability (primary)<sup>^</sup>

| Subgroup | Trial          | Lower Oxygen Saturation Target |             | Higher Oxygen Saturation Target |             | Adjusted* Relative Risk (95% CI) |              |                     |
|----------|----------------|--------------------------------|-------------|---------------------------------|-------------|----------------------------------|--------------|---------------------|
|          |                | n (%)                          | N           | n (%)                           | N           | Adjusted RR                      | p-value      | interaction p-value |
| SGA      | SUPPORT        | 214 (46.8)                     | 457         | 231 (49.4)                      | 468         | 0.95 (0.83, 1.09)                | 0.452        | 0.784               |
| SUPPORT  | COT            | 188 (41.5)                     | 453         | 183 (40.0)                      | 458         | 1.01 (0.87, 1.16)                | 0.921        |                     |
| Defined  | BOOST II NZ    | 32 (29.6)                      | 108         | 43 (37.7)                       | 114         | 0.78 (0.54, 1.13)                | 0.188        |                     |
| No       | BOOST II UK    | 102 (41.3)                     | 247         | 103 (38.9)                      | 265         | 1.09 (0.89, 1.34)                | 0.414        |                     |
|          | BOOST II AUS   | 120 (32.4)                     | 370         | 108 (28.5)                      | 379         | 1.14 (0.93, 1.41)                | 0.207        |                     |
|          | <b>NeOProM</b> | <b>656 (40.1)</b>              | <b>1635</b> | <b>668 (39.7)</b>               | <b>1684</b> | <b>1.01 (0.93, 1.09)</b>         | <b>0.875</b> |                     |
| Yes      | SUPPORT        | 9 (56.3)                       | 16          | 25 (65.8)                       | 38          | 0.86 (0.53, 1.41)                | 0.558        |                     |
|          | COT            | 13 (48.1)                      | 27          | 11 (50.0)                       | 22          | 0.96 (0.54, 1.71)                | 0.897        |                     |
|          | BOOST II NZ    | 5 (50.0)                       | 10          | 1 (25.0)                        | 4           | 2.00 (0.33, 12.2)                | 0.452        |                     |
|          | BOOST II UK    | 7 (36.8)                       | 19          | 10 (45.5)                       | 22          | 0.81 (0.38, 1.71)                | 0.581        |                     |
|          | BOOST II AUS   | 17 (45.9)                      | 37          | 17 (40.5)                       | 42          | 1.14 (0.68, 1.88)                | 0.624        |                     |
|          | <b>NeOProM</b> | <b>51 (46.8)</b>               | <b>109</b>  | <b>64 (50.0)</b>                | <b>128</b>  | <b>0.97 (0.75, 1.27)</b>         | <b>0.850</b> |                     |

<sup>^</sup> Primary outcome as pre-specified in published NeOProM protocol: composite outcome of death or major disability by 18-24 months' age, corrected for prematurity. Major disability is any of the following: Bayley-III Developmental Assessment cognitive score <85 and/or language score <85; severe visual loss; cerebral palsy with Gross Motor Function Classification System (GMFCS) level 2 or higher at 18-24 months' age, corrected for prematurity; or deafness requiring hearing aids.

### Major disability (supportive)#

| Subgroup | Trial          | Lower Oxygen Saturation Target |             | Higher Oxygen Saturation Target |             | Adjusted* Relative Risk (95% CI) |              |                     |
|----------|----------------|--------------------------------|-------------|---------------------------------|-------------|----------------------------------|--------------|---------------------|
|          |                | n (%)                          | N           | n (%)                           | N           | Adjusted RR                      | p-value      | interaction p-value |
| SGA      | SUPPORT        | 215 (46.9)                     | 458         | 231 (49.4)                      | 468         | 0.95 (0.83, 1.09)                | 0.473        | 0.582               |
| SUPPORT  | COT            | 188 (41.5)                     | 453         | 184 (40.1)                      | 459         | 1.00 (0.87, 1.16)                | 0.951        |                     |
| Defined  | BOOST II NZ    | 35 (26.5)                      | 132         | 47 (34.3)                       | 137         | 0.77 (0.54, 1.08)                | 0.132        |                     |
| No       | BOOST II UK    | 113 (35.1)                     | 322         | 110 (32.1)                      | 343         | 1.13 (0.92, 1.39)                | 0.260        |                     |
|          | BOOST II AUS   | 128 (31.5)                     | 406         | 113 (27.5)                      | 411         | 1.15 (0.94, 1.41)                | 0.168        |                     |
|          | <b>NeOProM</b> | <b>679 (38.3)</b>              | <b>1771</b> | <b>685 (37.7)</b>               | <b>1818</b> | <b>1.01 (0.93, 1.10)</b>         | <b>0.774</b> |                     |
| Yes      | SUPPORT        | 9 (56.3)                       | 16          | 25 (65.8)                       | 38          | 0.86 (0.53, 1.41)                | 0.558        |                     |
|          | COT            | 13 (46.4)                      | 28          | 11 (50.0)                       | 22          | 0.93 (0.52, 1.65)                | 0.801        |                     |
|          | BOOST II NZ    | 5 (50.0)                       | 10          | 1 (25.0)                        | 4           | 2.00 (0.33, 12.2)                | 0.452        |                     |
|          | BOOST II UK    | 10 (34.5)                      | 29          | 12 (44.4)                       | 27          | 0.78 (0.40, 1.49)                | 0.448        |                     |
|          | BOOST II AUS   | 17 (44.7)                      | 38          | 17 (40.5)                       | 42          | 1.11 (0.66, 1.84)                | 0.700        |                     |
|          | <b>NeOProM</b> | <b>54 (44.6)</b>               | <b>121</b>  | <b>66 (49.6)</b>                | <b>133</b>  | <b>0.95 (0.73, 1.24)</b>         | <b>0.691</b> |                     |

# **Supportive analysis of primary outcome:** including using alternative sources of information for classifying major disability as used within individual trials. This may have included a Bayley-II Mental Developmental Index (MDI) score <70, or another validated assessment tool (e.g. Griffiths test), or a paediatrician assessment, or parent-reported measure of neurodevelopmental impairment (e.g. able to speak less than 5-10 words) or other measures.

### Major disability (secondary)\*

| Subgroup | Trial          | Lower Oxygen Saturation Target |             | Higher Oxygen Saturation Target |             | Adjusted* Relative Risk (95% CI) |              |                     |
|----------|----------------|--------------------------------|-------------|---------------------------------|-------------|----------------------------------|--------------|---------------------|
|          |                | n (%)                          | N           | n (%)                           | N           | Adjusted RR                      | p-value      | interaction p-value |
| SGA      | SUPPORT        | 71 (15.5)                      | 457         | 87 (18.6)                       | 468         | 0.81 (0.60, 1.09)                | 0.170        | 0.195               |
| SUPPORT  | COT            | 78 (18.1)                      | 432         | 75 (17.0)                       | 442         | 1.01 (0.76, 1.35)                | 0.935        |                     |
| Defined  | BOOST II NZ    | 8 (7.4)                        | 108         | 11 (9.9)                        | 111         | 0.78 (0.33, 1.86)                | 0.576        |                     |
| No       | BOOST II UK    | 68 (27.6)                      | 246         | 67 (25.5)                       | 263         | 1.09 (0.81, 1.46)                | 0.573        |                     |
|          | BOOST II AUS   | 53 (14.4)                      | 368         | 47 (12.5)                       | 377         | 1.18 (0.82, 1.70)                | 0.362        |                     |
|          | <b>NeOProM</b> | <b>278 (17.3)</b>              | <b>1611</b> | <b>287 (17.3)</b>               | <b>1661</b> | <b>0.99 (0.85, 1.15)</b>         | <b>0.891</b> |                     |
| Yes      | SUPPORT        | 6 (37.5)                       | 16          | 17 (44.7)                       | 38          | 0.82 (0.40, 1.69)                | 0.587        |                     |
|          | COT            | 5 (18.5)                       | 27          | 4 (19.0)                        | 21          | 0.97 (0.30, 3.18)                | 0.963        |                     |
|          | BOOST II NZ    | 2 (20.0)                       | 10          | 1 (25.0)                        | 4           | 0.80 (0.10, 6.54)                | 0.835        |                     |
|          | BOOST II UK    | 4 (21.1)                       | 19          | 6 (27.3)                        | 22          | 0.77 (0.26, 2.33)                | 0.647        |                     |
|          | BOOST II AUS   | 5 (13.5)                       | 37          | 10 (23.8)                       | 42          | 0.57 (0.21, 1.51)                | 0.257        |                     |
|          | <b>NeOProM</b> | <b>22 (20.2)</b>               | <b>109</b>  | <b>38 (29.9)</b>                | <b>127</b>  | <b>0.76 (0.48, 1.21)</b>         | <b>0.246</b> |                     |

+ **Secondary analysis:** composite outcome of death or major disability by 18-24 months' age, corrected for prematurity. Major disability is any of the following: Bayley-III Developmental Assessment cognitive score <70 and/or language score <70; severe visual loss; cerebral palsy with Gross Motor Function Classification System (GMFCS) level 2 or higher at 18-24 months' age, corrected for prematurity; or deafness requiring hearing aids.

### Major disability (trialist defined)~

|          |                | Lower Oxygen Saturation Target |             | Higher Oxygen Saturation Target |             | Adjusted* Relative Risk (95% CI) |              |                     |
|----------|----------------|--------------------------------|-------------|---------------------------------|-------------|----------------------------------|--------------|---------------------|
| Subgroup | Trial          | n (%)                          | N           | n (%)                           | N           | Adjusted RR                      | p-value      | interaction p-value |
| SGA      | SUPPORT        | 40 (8.8)                       | 456         | 44 (9.4)                        | 466         | 0.90 (0.59, 1.37)                | 0.612        | 0.605               |
| SUPPORT  | COT            | 188 (41.5)                     | 453         | 184 (40.1)                      | 459         | 1.00 (0.87, 1.16)                | 0.951        |                     |
| Defined  | BOOST II NZ    | 35 (26.5)                      | 132         | 48 (35.0)                       | 137         | 0.75 (0.53, 1.06)                | 0.105        |                     |
| No       | BOOST II UK    | 113 (35.1)                     | 322         | 110 (32.1)                      | 343         | 1.13 (0.92, 1.39)                | 0.260        |                     |
|          | BOOST II AUS   | 129 (31.5)                     | 410         | 113 (27.2)                      | 415         | 1.16 (0.95, 1.42)                | 0.150        |                     |
|          | <b>NeOProM</b> | <b>505 (28.5)</b>              | <b>1773</b> | <b>499 (27.4)</b>               | <b>1820</b> | <b>1.04 (0.94, 1.14)</b>         | <b>0.463</b> |                     |
| Yes      | SUPPORT        | 5 (31.3)                       | 16          | 9 (23.7)                        | 38          | 1.30 (0.52, 3.29)                | 0.575        |                     |
|          | COT            | 13 (46.4)                      | 28          | 11 (50.0)                       | 22          | 0.93 (0.52, 1.65)                | 0.801        |                     |
|          | BOOST II NZ    | 5 (50.0)                       | 10          | 1 (25.0)                        | 4           | 2.00 (0.33, 12.2)                | 0.452        |                     |
|          | BOOST II UK    | 10 (34.5)                      | 29          | 12 (44.4)                       | 27          | 0.78 (0.40, 1.49)                | 0.448        |                     |
|          | BOOST II AUS   | 17 (44.7)                      | 38          | 17 (39.5)                       | 43          | 1.13 (0.68, 1.89)                | 0.636        |                     |
|          | <b>NeOProM</b> | <b>50 (41.3)</b>               | <b>121</b>  | <b>50 (37.3)</b>                | <b>134</b>  | <b>1.03 (0.75, 1.39)</b>         | <b>0.874</b> |                     |

~ Trialist defined analysis: primary outcome as defined by trialists - includes alternative measures of disability as described in 'supportive analysis of primary outcome'

### Cerebral Palsy at 18-24 months' age corrected for prematurity

|          |                | Lower Oxygen Saturation Target |             | Higher Oxygen Saturation Target |             | Adjusted* Relative Risk (95% CI) |              |                     |
|----------|----------------|--------------------------------|-------------|---------------------------------|-------------|----------------------------------|--------------|---------------------|
| Subgroup | Trial          | n (%)                          | N           | n (%)                           | N           | Adjusted RR                      | p-value      | interaction p-value |
| SGA      | SUPPORT        | 20 (4.3)                       | 462         | 17 (3.6)                        | 473         | 1.15 (0.60, 2.18)                | 0.677        | 0.265               |
| SUPPORT  | COT            | 28 (6.1)                       | 460         | 30 (6.5)                        | 465         | 0.98 (0.60, 1.61)                | 0.944        |                     |
| Defined  | BOOST II NZ    | 5 (3.7)                        | 134         | 7 (5.1)                         | 137         | 0.74 (0.24, 2.28)                | 0.601        |                     |
| No       | BOOST II UK    | 33 (10.2)                      | 324         | 23 (6.7)                        | 343         | 1.54 (0.92, 2.57)                | 0.102        |                     |
|          | BOOST II AUS   | 16 (3.9)                       | 407         | 22 (5.3)                        | 414         | 0.77 (0.40, 1.47)                | 0.423        |                     |
|          | <b>NeOProM</b> | <b>102 (5.7)</b>               | <b>1787</b> | <b>99 (5.4)</b>                 | <b>1832</b> | <b>1.06 (0.80, 1.39)</b>         | <b>0.691</b> |                     |
| Yes      | SUPPORT        | 0                              | 17          | 3 (7.9)                         | 38          |                                  | ***          |                     |
|          | COT            | 2 (7.1)                        | 28          | 1 (4.3)                         | 23          | 1.64 (0.16, 17.0)                | 0.677        |                     |
|          | BOOST II NZ    | 0                              | 10          | 0                               | 4           | 1.64 (0.16, 17.0)                | 0.677        |                     |
|          | BOOST II UK    | 2 (6.9)                        | 29          | 1 (3.7)                         | 27          | 1.86 (0.18, 19.4)                | 0.603        |                     |
|          | BOOST II AUS   | 0                              | 38          | 3 (7.1)                         | 42          |                                  | ***          |                     |
|          | <b>NeOProM</b> | <b>4 (3.3)</b>                 | <b>122</b>  | <b>8 (6.0)</b>                  | <b>134</b>  | <b>0.58 (0.21, 2.02)</b>         | <b>0.452</b> |                     |

### Severe visual impairment at 18-24 months' age corrected for prematurity

|          |                | Lower Oxygen Saturation Target |             | Higher Oxygen Saturation Target |             | Adjusted* Relative Risk (95% CI) |              |                     |
|----------|----------------|--------------------------------|-------------|---------------------------------|-------------|----------------------------------|--------------|---------------------|
| Subgroup | Trial          | n (%)                          | N           | n (%)                           | N           | Adjusted RR                      | p-value      | interaction p-value |
| SGA      | SUPPORT        | 4 (0.9)                        | 462         | 4 (0.8)                         | 473         | 1.03 (0.26, 4.08)                | 0.966        | 0.759               |
| SUPPORT  | COT            | 5 (1.1)                        | 459         | 2 (0.4)                         | 465         | 2.53 (0.49, 12.99)               | 0.483        |                     |
| Defined  | BOOST II NZ    | 0                              | 134         | 1 (0.7)                         | 136         |                                  | ***          |                     |
| No       | BOOST II UK    | 11 (3.4)                       | 321         | 11 (3.2)                        | 342         | 1.07 (0.40, 2.87)                | 0.901        |                     |
|          | BOOST II AUS   | 3 (0.7)                        | 413         | 2 (0.5)                         | 416         | 1.51 (0.25, 8.96)                | 0.650        |                     |
|          | <b>NeOProM</b> | <b>23 (1.3)</b>                | <b>1789</b> | <b>20 (1.1)</b>                 | <b>1832</b> | <b>1.16 (0.58, 2.29)</b>         | <b>0.677</b> |                     |
| Yes      | SUPPORT        | 1 (5.9)                        | 17          | 2 (5.3)                         | 38          | 1.11 (0.11, 11.5)                | 0.927        |                     |
|          | COT            | 0                              | 28          | 1 (4.3)                         | 23          |                                  | ***          |                     |
|          | BOOST II NZ    | 0                              | 9           | 0                               | 4           |                                  | ***          |                     |
|          | BOOST II UK    | 1 (3.6)                        | 28          | 0                               | 27          |                                  | ***          |                     |
|          | BOOST II AUS   | 0                              | 38          | 0                               | 43          |                                  | ***          |                     |
|          | <b>NeOProM</b> | <b>2 (1.7)</b>                 | <b>120</b>  | <b>3 (2.2)</b>                  | <b>135</b>  | <b>1.01 (0.22, 4.24)</b>         | <b>0.982</b> |                     |

### Deafness at 18-24 months' age corrected for prematurity

|          |                | Lower Oxygen Saturation Target |             | Higher Oxygen Saturation Target |             | Adjusted* Relative Risk (95% CI) |              |                     |
|----------|----------------|--------------------------------|-------------|---------------------------------|-------------|----------------------------------|--------------|---------------------|
| Subgroup | Trial          | n (%)                          | N           | n (%)                           | N           | Adjusted RR                      | p-value      | interaction p-value |
| SGA      | SUPPORT        | 7 (1.5)                        | 462         | 6 (1.3)                         | 473         | 1.19 (0.40, 3.52)                | 0.748        | 0.784               |
| SUPPORT  | COT            | 17 (3.7)                       | 459         | 11 (2.4)                        | 466         | 1.57 (0.75, 3.29)                | 0.235        |                     |
| Defined  | BOOST II NZ    | 2 (1.5)                        | 133         | 1 (0.7)                         | 135         | 2.03 (0.19, 21.9)                | 0.560        |                     |
| No       | BOOST II UK    | 19 (5.9)                       | 323         | 30 (8.8)                        | 342         | 0.72 (0.42, 1.23)                | 0.224        |                     |
|          | BOOST II AUS   | 10 (2.5)                       | 406         | 8 (2.0)                         | 409         | 1.25 (0.50, 3.15)                | 0.629        |                     |
|          | <b>NeOProM</b> | <b>55 (3.1)</b>                | <b>1783</b> | <b>56 (3.1)</b>                 | <b>1825</b> | <b>1.03 (0.72, 1.49)</b>         | <b>0.859</b> |                     |
| Yes      | SUPPORT        | 0                              | 17          | 0                               | 38          |                                  | ***          |                     |
|          | COT            | 1 (3.6)                        | 28          | 1 (4.3)                         | 23          | 0.82 (0.05, 12.4)                | 0.887        |                     |
|          | BOOST II NZ    | 0                              | 9           | 0                               | 4           |                                  | ***          |                     |
|          | BOOST II UK    | 3 (10.3)                       | 29          | 2 (7.4)                         | 27          | 1.40 (0.25, 7.73)                | 0.702        |                     |
|          | BOOST II AUS   | 1 (2.6)                        | 38          | 1 (2.4)                         | 42          | 1.11 (0.07, 17.1)                | 0.943        |                     |
|          | <b>NeOProM</b> | <b>5 (4.1)</b>                 | <b>121</b>  | <b>4 (3.0)</b>                  | <b>134</b>  | <b>1.18 (0.33, 4.20)</b>         | <b>0.803</b> |                     |

### Positive Airway Pressure with endotracheal tube at 36 weeks

|          |                | Lower Oxygen Saturation Target |             | Higher Oxygen Saturation Target |             | Adjusted* Relative Risk (95% CI) |              |                     |
|----------|----------------|--------------------------------|-------------|---------------------------------|-------------|----------------------------------|--------------|---------------------|
| Subgroup | Trial          | n (%)                          | N           | n (%)                           | N           | Adjusted RR                      | p-value      | interaction p-value |
| SGA      | SUPPORT        | 42 (9.8)                       | 429         | 35 (7.8)                        | 449         | 1.25 (0.81, 1.93)                | 0.308        | 0.111               |
| SUPPORT  | COT            | 87 (15.5)                      | 561         | 87 (15.5)                       | 563         | 1.00 (0.76, 1.31)                | 0.985        |                     |
| Defined  | BOOST II NZ    | 2 (1.4)                        | 142         | 3 (2.1)                         | 142         | 0.68 (0.13, 3.62)                | 0.651        |                     |
| No       | BOOST II UK    | 11 (3.3)                       | 337         | 10 (2.8)                        | 360         | 1.18 (0.51, 2.75)                | 0.702        |                     |
|          | BOOST II AUS   | 9 (2.1)                        | 435         | 11 (2.5)                        | 444         | 0.75 (0.32, 1.76)                | 0.505        |                     |
|          | <b>NeOProM</b> | <b>151 (7.9)</b>               | <b>1904</b> | <b>146 (7.5)</b>                | <b>1958</b> | <b>1.04 (0.84, 1.29)</b>         | <b>0.702</b> |                     |
| Yes      | SUPPORT        | 5 (22.7)                       | 22          | 9 (22.0)                        | 41          | 1.02 (0.39, 2.68)                | 0.961        |                     |
|          | COT            | 10 (25.0)                      | 40          | 12 (35.3)                       | 34          | 0.71 (0.35, 1.43)                | 0.337        |                     |
|          | BOOST II NZ    | 1 (9.1)                        | 11          | 1 (16.7)                        | 6           | 0.55 (0.04, 7.25)                | 0.646        |                     |
|          | BOOST II UK    | 1 (3.1)                        | 32          | 2 (6.1)                         | 33          | 0.52 (0.05, 5.41)                | 0.325        |                     |
|          | BOOST II AUS   | 0                              | 42          | 5 (10.0)                        | 50          |                                  | ***          |                     |
|          | <b>NeOProM</b> | <b>17 (11.6)</b>               | <b>147</b>  | <b>29 (17.7)</b>                | <b>164</b>  | <b>0.67 (0.39, 1.14)</b>         | <b>0.137</b> |                     |

### Positive Airway Pressure without endotracheal tube at 36 weeks

|          |                | Lower Oxygen Saturation Target |             | Higher Oxygen Saturation Target |             | Adjusted* Relative Risk (95% CI) |              |                     |
|----------|----------------|--------------------------------|-------------|---------------------------------|-------------|----------------------------------|--------------|---------------------|
| Subgroup | Trial          | n (%)                          | N           | n (%)                           | N           | Adjusted RR                      | p-value      | interaction p-value |
| SGA      | SUPPORT        | 100 (23.3)                     | 429         | 148 (33.0)                      | 449         | 0.73 (0.58, 0.91)                | 0.005        | 0.489               |
| SUPPORT  | COT            | 159 (28.3)                     | 561         | 163 (29.0)                      | 563         | 0.95 (0.80, 1.14)                | 0.594        |                     |
| Defined  | BOOST II NZ    | 32 (22.5)                      | 142         | 43 (30.3)                       | 142         | 0.76 (0.52, 1.12)                | 0.161        |                     |
| No       | BOOST II UK    | 56 (16.6)                      | 337         | 63 (17.5)                       | 360         | 0.98 (0.70, 1.36)                | 0.890        |                     |
|          | BOOST II AUS   | 82 (18.9)                      | 435         | 75 (16.9)                       | 444         | 1.08 (0.82, 1.42)                | 0.575        |                     |
|          | <b>NeOProM</b> | <b>429 (22.5)</b>              | <b>1904</b> | <b>492 (25.1)</b>               | <b>1958</b> | <b>0.89 (0.80, 1.00)</b>         | <b>0.041</b> |                     |
| Yes      | SUPPORT        | 11 (50.0)                      | 22          | 18 (43.9)                       | 41          | 1.05 (0.68, 1.62)                | 0.838        |                     |
|          | COT            | 18 (45.0)                      | 40          | 15 (44.1)                       | 34          | 1.02 (0.61, 1.70)                | 0.939        |                     |
|          | BOOST II NZ    | 6 (54.5)                       | 11          | 3 (50.0)                        | 6           | 1.09 (0.42, 2.86)                | 0.860        |                     |
|          | BOOST II UK    | 10 (31.3)                      | 32          | 13 (39.4)                       | 33          | 0.80 (0.43, 1.50)                | 0.488        |                     |
|          | BOOST II AUS   | 16 (38.1)                      | 42          | 23 (46.0)                       | 50          | 0.84 (0.53, 1.32)                | 0.446        |                     |
|          | <b>NeOProM</b> | <b>61 (41.5)</b>               | <b>147</b>  | <b>72 (43.9)</b>                | <b>164</b>  | <b>0.95 (0.73, 1.23)</b>         | <b>0.699</b> |                     |

## Supplemental oxygen<sup>#</sup> without Positive Airway Pressure at 36 weeks

|          |                | Lower Oxygen Saturation Target |             | Higher Oxygen Saturation Target |             | Adjusted* Relative Risk (95% CI) |                 |                     |
|----------|----------------|--------------------------------|-------------|---------------------------------|-------------|----------------------------------|-----------------|---------------------|
| Subgroup | Trial          | n (%)                          | N           | n (%)                           | N           | Adjusted RR                      | p-value         | interaction p-value |
| SGA      | SUPPORT        | 48 (11.2)                      | 429         | 57 (12.8)                       | 447         | 0.85 (0.59, 1.24)                | 0.404           | 0.026               |
| SUPPORT  | COT            | 145 (39.4)                     | 368         | 175 (47.9)                      | 365         | 0.85 (0.73, 0.99)                | 0.043           |                     |
| Defined  | BOOST II NZ    | 21 (14.8)                      | 142         | 34 (23.9)                       | 142         | 0.62 (0.38, 1.01)                | 0.055           |                     |
| No       | BOOST II UK    | 121 (35.9)                     | 337         | 138 (38.3)                      | 360         | 0.91 (0.75, 1.10)                | 0.334           |                     |
|          | BOOST II AUS   | 95 (21.8)                      | 435         | 121 (27.3)                      | 444         | 0.81 (0.65, 1.01)                | 0.061           |                     |
|          | <b>NeOProM</b> | <b>430 (25.1)</b>              | <b>1711</b> | <b>525 (29.9)</b>               | <b>1758</b> | <b>0.84 (0.76, 0.93)</b>         | <b>&lt;.001</b> |                     |
| Yes      | SUPPORT        | 2 (9.1)                        | 22          | 7 (17.1)                        | 41          | 0.28 (0.07, 1.13)                | 0.074           |                     |
|          | COT            | 11 (39.3)                      | 28          | 17 (77.3)                       | 22          | 0.51 (0.30, 0.85)                | 0.010           |                     |
|          | BOOST II NZ    | 2 (18.2)                       | 11          | 3 (50.0)                        | 6           | 0.36 (0.08, 1.61)                | 0.182           |                     |
|          | BOOST II UK    | 5 (15.6)                       | 32          | 9 (27.3)                        | 33          | 0.58 (0.22, 1.50)                | 0.260           |                     |
|          | BOOST II AUS   | 9 (21.4)                       | 42          | 17 (34.0)                       | 50          | 0.66 (0.34, 1.28)                | 0.221           |                     |
|          | <b>NeOProM</b> | <b>29 (21.5)</b>               | <b>135</b>  | <b>53 (34.9)</b>                | <b>152</b>  | <b>0.54 (0.37, 0.77)</b>         | <b>&lt;.001</b> |                     |

<sup>#</sup>SUPPORT and UK trials used a physiologic test to determine need for supplemental oxygen whilst the other trials did not.

## Discharged on home oxygen

|          |                | Lower Oxygen Saturation Target |             | Higher Oxygen Saturation Target |             | Adjusted* Relative Risk (95% CI) |              |                     |
|----------|----------------|--------------------------------|-------------|---------------------------------|-------------|----------------------------------|--------------|---------------------|
| Subgroup | Trial          | n (%)                          | N           | n (%)                           | N           | Adjusted RR                      | p-value      | interaction p-value |
| SGA      | SUPPORT        | 110 (21.9)                     | 502         | 108 (21.2)                      | 509         | 1.04 (0.82, 1.32)                | 0.747        | 0.491               |
| SUPPORT  | COT            | 72 (15.0)                      | 479         | 64 (13.1)                       | 489         | 1.15 (0.85, 1.55)                | 0.380        |                     |
| Defined  | BOOST II NZ    | 29 (18.2)                      | 159         | 37 (22.7)                       | 163         | 0.81 (0.52, 1.26)                | 0.345        |                     |
| No       | BOOST II UK    | 128 (37.6)                     | 340         | 121 (33.8)                      | 358         | 1.09 (0.90, 1.32)                | 0.361        |                     |
|          | BOOST II AUS   | 65 (12.8)                      | 508         | 78 (15.2)                       | 512         | 0.84 (0.62, 1.15)                | 0.270        |                     |
|          | <b>NeOProM</b> | <b>404 (20.3)</b>              | <b>1988</b> | <b>408 (20.1)</b>               | <b>2031</b> | <b>1.02 (0.91, 1.15)</b>         | <b>0.732</b> |                     |
| Yes      | SUPPORT        | 8 (44.4)                       | 18          | 20 (50.0)                       | 40          | 0.89 (0.52, 1.51)                | 0.664        |                     |
|          | COT            | 8 (28.6)                       | 28          | 4 (17.4)                        | 23          | 1.64 (0.57, 4.77)                | 0.361        |                     |
|          | BOOST II NZ    | 5 (45.5)                       | 11          | 4 (57.1)                        | 7           | 0.80 (0.32, 1.98)                | 0.623        |                     |
|          | BOOST II UK    | 13 (44.8)                      | 29          | 17 (58.6)                       | 29          | 0.76 (0.46, 1.27)                | 0.299        |                     |
|          | BOOST II AUS   | 17 (30.4)                      | 56          | 13 (23.6)                       | 55          | 1.31 (0.70, 2.45)                | 0.391        |                     |
|          | <b>NeOProM</b> | <b>51 (35.9)</b>               | <b>142</b>  | <b>58 (37.7)</b>                | <b>154</b>  | <b>0.96 (0.72, 1.28)</b>         | <b>0.781</b> |                     |

## Readmission to hospital

|          |                | Lower Oxygen Saturation Target |             | Higher Oxygen Saturation Target |             | Adjusted* Relative Risk (95% CI) |              |                     |
|----------|----------------|--------------------------------|-------------|---------------------------------|-------------|----------------------------------|--------------|---------------------|
| Subgroup | Trial          | n (%)                          | N           | n (%)                           | N           | Adjusted RR                      | p-value      | interaction p-value |
| SGA      | SUPPORT        | 204 (44.3)                     | 461         | 222 (46.3)                      | 479         | 0.95 (0.82, 1.10)                | 0.476        | 0.801               |
| SUPPORT  | COT            | 206 (45.0)                     | 458         | 190 (40.9)                      | 464         | 1.10 (0.95, 1.27)                | 0.209        |                     |
| Defined  | BOOST II NZ    | 97 (75.2)                      | 129         | 92 (69.2)                       | 133         | 1.09 (0.94, 1.26)                | 0.244        |                     |
| No       | BOOST II UK    | 147 (63.6)                     | 231         | 158 (66.7)                      | 237         | 0.96 (0.84, 1.10)                | 0.536        |                     |
|          | BOOST II AUS   | 220 (60.3)                     | 365         | 227 (60.2)                      | 377         | 1.01 (0.90, 1.13)                | 0.888        |                     |
|          | <b>NeOProM</b> | <b>874 (53.2)</b>              | <b>1644</b> | <b>889 (52.6)</b>               | <b>1690</b> | <b>1.02 (0.96, 1.08)</b>         | <b>0.605</b> |                     |
| Yes      | SUPPORT        | 6 (35.3)                       | 17          | 18 (47.4)                       | 38          | 0.77 (0.37, 1.60)                | 0.480        |                     |
|          | COT            | 15 (53.6)                      | 28          | 11 (50.0)                       | 22          | 1.07 (0.62, 1.84)                | 0.803        |                     |
|          | BOOST II NZ    | 9 (90.0)                       | 10          | 4 (100.0)                       | 4           | 0.96 (0.66, 1.40)                | 0.542        |                     |
|          | BOOST II UK    | 15 (75.0)                      | 20          | 18 (75.0)                       | 24          | 1.00 (0.71, 1.41)                | 1.000        |                     |
|          | BOOST II AUS   | 23 (65.7)                      | 35          | 27 (65.9)                       | 41          | 1.00 (0.72, 1.38)                | 0.990        |                     |
|          | <b>NeOProM</b> | <b>68 (61.8)</b>               | <b>110</b>  | <b>78 (60.5)</b>                | <b>129</b>  | <b>0.94 (0.82, 1.09)</b>         | <b>0.423</b> |                     |

## Patent ductus arteriosus (PDA) medically or surgically treated

|          |                | Lower Oxygen Saturation Target |             | Higher Oxygen Saturation Target |             | Adjusted* Relative Risk (95% CI) |              |                     |
|----------|----------------|--------------------------------|-------------|---------------------------------|-------------|----------------------------------|--------------|---------------------|
| Subgroup | Trial          | n (%)                          | N           | n (%)                           | N           | Adjusted RR                      | p-value      | interaction p-value |
| SGA      | SUPPORT        | 223 (37.5)                     | 594         | 228 (38.4)                      | 594         | 0.98 (0.85, 1.14)                | 0.830        | 0.386               |
| SUPPORT  | COT            | 304 (54.1)                     | 562         | 311 (55.0)                      | 565         | 0.96 (0.87, 1.07)                | 0.485        |                     |
| Defined  | BOOST II NZ    | 96 (60.4)                      | 159         | 85 (52.1)                       | 163         | 1.17 (0.97, 1.42)                | 0.110        |                     |
| No       | BOOST II UK    | 184 (41.8)                     | 440         | 170 (38.4)                      | 443         | 1.09 (0.93, 1.27)                | 0.283        |                     |
|          | BOOST II AUS   | 255 (49.9)                     | 511         | 251 (49.1)                      | 511         | 1.01 (0.89, 1.14)                | 0.926        |                     |
|          | <b>NeOProM</b> | <b>1062 (46.9)</b>             | <b>2266</b> | <b>1045 (45.9)</b>              | <b>2276</b> | <b>1.02 (0.96, 1.08)</b>         | <b>0.560</b> |                     |
| Yes      | SUPPORT        | 11 (26.8)                      | 41          | 14 (27.5)                       | 51          | 0.97 (0.49, 1.90)                | 0.922        |                     |
|          | COT            | 20 (50.0)                      | 40          | 21 (61.8)                       | 34          | 0.81 (0.54, 1.22)                | 0.309        |                     |
|          | BOOST II NZ    | 8 (72.7)                       | 11          | 5 (71.4)                        | 7           | 1.02 (0.56, 1.84)                | 0.952        |                     |
|          | BOOST II UK    | 14 (33.3)                      | 42          | 16 (40.0)                       | 40          | 0.83 (0.47, 1.48)                | 0.984        |                     |
|          | BOOST II AUS   | 24 (42.9)                      | 56          | 26 (47.3)                       | 55          | 0.90 (0.60, 1.36)                | 0.617        |                     |
|          | <b>NeOProM</b> | <b>77 (40.5)</b>               | <b>190</b>  | <b>82 (43.9)</b>                | <b>187</b>  | <b>0.89 (0.71, 1.11)</b>         | <b>0.304</b> |                     |

## Patent ductus arteriosus (PDA) surgically treated

|          |                | Lower Oxygen Saturation Target |             | Higher Oxygen Saturation Target |             | Adjusted* Relative Risk (95% CI) |              |                     |
|----------|----------------|--------------------------------|-------------|---------------------------------|-------------|----------------------------------|--------------|---------------------|
| Subgroup | Trial          | n (%)                          | N           | n (%)                           | N           | Adjusted RR                      | p-value      | interaction p-value |
| SGA      | SUPPORT        | 70 (11.7)                      | 600         | 64 (10.7)                       | 597         | 1.11 (0.80, 1.55)                | 0.537        | 0.714               |
| SUPPORT  | COT            | 91 (16.2)                      | 562         | 90 (15.9)                       | 565         | 1.01 (0.78, 1.31)                | 0.934        |                     |
| Defined  | BOOST II NZ    | 11 (6.9)                       | 159         | 10 (6.1)                        | 163         | 1.11 (0.55, 2.26)                | 0.770        |                     |
| No       | BOOST II UK    | 57 (13.0)                      | 440         | 42 (9.5)                        | 443         | 1.35 (0.92, 1.99)                | 0.129        |                     |
|          | BOOST II AUS   | 35 (6.8)                       | 511         | 21 (4.1)                        | 509         | 2.38 (1.32, 4.29)                | 0.004        |                     |
|          | <b>NeOProM</b> | <b>264 (11.6)</b>              | <b>2272</b> | <b>227 (10.0)</b>               | <b>2277</b> | <b>1.17 (0.99, 1.38)</b>         | <b>0.066</b> |                     |
| Yes      | SUPPORT        | 3 (7.3)                        | 41          | 4 (7.8)                         | 51          | 0.93 (0.22, 3.93)                | 0.921        |                     |
|          | COT            | 6 (15.0)                       | 40          | 3 (8.8)                         | 34          | 1.70 (0.46, 6.29)                | 0.427        |                     |
|          | BOOST II NZ    | 1 (9.1)                        | 11          | 1 (14.3)                        | 7           | 0.64 (0.05, 8.61)                | 0.734        |                     |
|          | BOOST II UK    | 5 (11.9)                       | 42          | 3 (7.5)                         | 40          | 1.44 (0.40, 5.14)                | 0.576        |                     |
|          | BOOST II AUS   | 2 (3.6)                        | 56          | 2 (3.6)                         | 55          | 0.98 (0.14, 6.69)                | 0.985        |                     |
|          | <b>NeOProM</b> | <b>17 (8.9)</b>                | <b>190</b>  | <b>13 (7.0)</b>                 | <b>187</b>  | <b>1.25 (0.63, 2.49)</b>         | <b>0.522</b> |                     |

## Severe necrotizing enterocolitis (NEC)

|          |                | Lower Oxygen Saturation Target |             | Higher Oxygen Saturation Target |             | Adjusted* Relative Risk (95% CI) |              |                     |
|----------|----------------|--------------------------------|-------------|---------------------------------|-------------|----------------------------------|--------------|---------------------|
| Subgroup | Trial          | n (%)                          | N           | n (%)                           | N           | Adjusted RR                      | p-value      | interaction p-value |
| SGA      | SUPPORT        | 46 (7.7)                       | 600         | 35 (5.9)                        | 598         | 1.32 (0.85, 2.03)                | 0.213        | 0.184               |
| SUPPORT  | COT            | 47 (8.4)                       | 562         | 35 (6.2)                        | 565         | 1.36 (0.89, 2.08)                | 0.156        |                     |
| Defined  | BOOST II NZ    | 12 (7.5)                       | 159         | 12 (7.4)                        | 163         | 1.05 (0.49, 2.27)                | 0.901        |                     |
| No       | BOOST II UK    | 66 (14.9)                      | 442         | 51 (11.6)                       | 440         | 1.31 (0.93, 1.84)                | 0.122        |                     |
|          | BOOST II AUS   | 38 (7.4)                       | 511         | 29 (5.7)                        | 512         | 1.33 (0.83, 2.13)                | 0.235        |                     |
|          | <b>NeOProM</b> | <b>209 (9.2)</b>               | <b>2274</b> | <b>162 (7.1)</b>                | <b>2278</b> | <b>1.29 (1.06, 1.57)</b>         | <b>0.012</b> |                     |
| Yes      | SUPPORT        | 5 (12.2)                       | 41          | 2 (3.9)                         | 51          | 3.11 (0.63, 15.2)                | 0.162        |                     |
|          | COT            | 2 (5.0)                        | 40          | 1 (2.9)                         | 34          | 1.70 (0.16, 17.9)                | 0.659        |                     |
|          | BOOST II NZ    | 3 (27.3)                       | 11          | 0                               | 7           |                                  | ***          |                     |
|          | BOOST II UK    | 5 (11.9)                       | 42          | 1 (2.5)                         | 40          | 5.55 (0.63, 49.0)                | 0.123        |                     |
|          | BOOST II AUS   | 3 (5.4)                        | 56          | 4 (7.3)                         | 55          | 0.80 (0.22, 3.00)                | 0.746        |                     |
|          | <b>NeOProM</b> | <b>18 (9.5)</b>                | <b>190</b>  | <b>8 (4.3)</b>                  | <b>187</b>  | <b>2.39 (1.09, 5.23)</b>         | <b>0.029</b> |                     |



## Retinopathy of prematurity (ROP) treatment

|          |                | Lower Oxygen Saturation Target |             | Higher Oxygen Saturation Target |             | Adjusted* Relative Risk (95% CI) |                 |                     |
|----------|----------------|--------------------------------|-------------|---------------------------------|-------------|----------------------------------|-----------------|---------------------|
| Subgroup | Trial          | n (%)                          | N           | n (%)                           | N           | Adjusted RR                      | p-value         | interaction p-value |
| SGA      | SUPPORT        | 33 (7.1)                       | 465         | 79 (16.6)                       | 475         | 0.42 (0.28, 0.62)                | <.001           | 0.494               |
| SUPPORT  | COT            | 60 (12.8)                      | 470         | 60 (12.6)                       | 478         | 0.95 (0.69, 1.30)                | 0.727           |                     |
| Defined  | BOOST II NZ    | 11 (7.5)                       | 147         | 13 (9.0)                        | 144         | 0.80 (0.38, 1.65)                | 0.544           |                     |
| No       | BOOST II UK    | 64 (17.9)                      | 358         | 78 (21.3)                       | 367         | 0.85 (0.63, 1.14)                | 0.281           |                     |
|          | BOOST II AUS   | 31 (7.0)                       | 442         | 41 (9.2)                        | 447         | 0.76 (0.49, 1.19)                | 0.231           |                     |
|          | <b>NeOProM</b> | <b>199 (10.6)</b>              | <b>1882</b> | <b>271 (14.2)</b>               | <b>1911</b> | <b>0.75 (0.63, 0.88)</b>         | <b>&lt;.001</b> |                     |
| Yes      | SUPPORT        | 3 (17.6)                       | 17          | 14 (35.9)                       | 39          | 0.48 (0.16, 1.46)                | 0.198           |                     |
|          | COT            | 4 (13.3)                       | 30          | 6 (24.0)                        | 25          | 0.56 (0.18, 1.75)                | 0.316           |                     |
|          | BOOST II NZ    | 3 (27.3)                       | 11          | 0                               | 6           |                                  | ***             |                     |
|          | BOOST II UK    | 5 (14.3)                       | 35          | 10 (29.4)                       | 34          | 0.49 (0.19, 1.26)                | 0.138           |                     |
|          | BOOST II AUS   | 6 (13.3)                       | 45          | 7 (14.0)                        | 50          | 0.95 (0.35, 2.60)                | 0.925           |                     |
|          | <b>NeOProM</b> | <b>21 (15.2)</b>               | <b>138</b>  | <b>37 (24.0)</b>                | <b>154</b>  | <b>0.66 (0.41, 1.07)</b>         | <b>0.090</b>    |                     |

## Death by 18-24 months' age corrected for prematurity

|          |                | Lower Oxygen Saturation Target |             | Higher Oxygen Saturation Target |             | Adjusted* Relative Risk (95% CI) |              |                     |
|----------|----------------|--------------------------------|-------------|---------------------------------|-------------|----------------------------------|--------------|---------------------|
| Subgroup | Trial          | n (%)                          | N           | n (%)                           | N           | Adjusted RR                      | p-value      | interaction p-value |
| SGA      | SUPPORT        | 116 (19.6)                     | 592         | 102 (17.2)                      | 593         | 1.16 (0.91, 1.48)                | 0.237        | 0.203               |
| SUPPORT  | COT            | 85 (15.6)                      | 545         | 77 (14.2)                       | 543         | 1.10 (0.83, 1.45)                | 0.509        |                     |
| Defined  | BOOST II NZ    | 24 (15.1)                      | 159         | 24 (14.7)                       | 163         | 1.00 (0.60, 1.65)                | 0.989        |                     |
| No       | BOOST II UK    | 109 (24.7)                     | 442         | 87 (19.6)                       | 443         | 1.25 (0.97, 1.60)                | 0.082        |                     |
|          | BOOST II AUS   | 83 (16.4)                      | 505         | 79 (15.6)                       | 508         | 1.06 (0.80, 1.40)                | 0.697        |                     |
|          | <b>NeOProM</b> | <b>417 (18.6)</b>              | <b>2243</b> | <b>369 (16.4)</b>               | <b>2250</b> | <b>1.14 (1.00, 1.29)</b>         | <b>0.047</b> |                     |
| Yes      | SUPPORT        | 24 (58.5)                      | 41          | 16 (29.1)                       | 55          | 1.99 (1.22, 3.24)                | 0.006        |                     |
|          | COT            | 12 (30.0)                      | 40          | 11 (32.4)                       | 34          | 0.93 (0.47, 1.83)                | 0.827        |                     |
|          | BOOST II NZ    | 1 (9.1)                        | 11          | 3 (42.9)                        | 7           | 0.21 (0.03, 1.66)                | 0.139        |                     |
|          | BOOST II UK    | 13 (31.0)                      | 42          | 11 (27.5)                       | 40          | 1.13 (0.57, 2.21)                | 0.549        |                     |
|          | BOOST II AUS   | 17 (30.9)                      | 55          | 8 (14.8)                        | 54          | 1.77 (0.18, 17.7)                | 0.625        |                     |
|          | <b>NeOProM</b> | <b>67 (35.4)</b>               | <b>189</b>  | <b>49 (25.8)</b>                | <b>190</b>  | <b>1.42 (1.05, 1.92)</b>         | <b>0.020</b> |                     |

### Death by 36 weeks' postmenstrual age

|          |                | Lower Oxygen Saturation Target |             | Higher Oxygen Saturation Target |             | Adjusted* Relative Risk (95% CI) |              |                     |
|----------|----------------|--------------------------------|-------------|---------------------------------|-------------|----------------------------------|--------------|---------------------|
| Subgroup | Trial          | n (%)                          | N           | n (%)                           | N           | Adjusted RR                      | p-value      | interaction p-value |
| SGA      | SUPPORT        | 96 (15.7)                      | 613         | 82 (13.5)                       | 607         | 1.18 (0.89, 1.57)                | 0.237        | 0.086               |
| SUPPORT  | COT            | 76 (13.5)                      | 562         | 71 (12.6)                       | 565         | 1.07 (0.79, 1.45)                | 0.646        |                     |
| Defined  | BOOST II NZ    | 17 (10.7)                      | 159         | 21 (12.9)                       | 163         | 0.84 (0.47, 1.50)                | 0.547        |                     |
| No       | BOOST II UK    | 98 (22.2)                      | 442         | 79 (17.8)                       | 443         | 1.23 (0.94, 1.61)                | 0.126        |                     |
|          | BOOST II AUS   | 76 (14.9)                      | 511         | 68 (13.3)                       | 512         | 1.12 (0.83, 1.51)                | 0.472        |                     |
|          | <b>NeOProM</b> | <b>363 (15.9)</b>              | <b>2287</b> | <b>321 (14.0)</b>               | <b>2290</b> | <b>1.13 (0.99, 1.30)</b>         | <b>0.076</b> |                     |
| Yes      | SUPPORT        | 18 (43.9)                      | 41          | 12 (21.8)                       | 55          | 2.00 (1.09, 3.67)                | 0.026        |                     |
|          | COT            | 10 (25.0)                      | 40          | 9 (26.5)                        | 34          | 0.94 (0.43, 2.05)                | 0.885        |                     |
|          | BOOST II NZ    | 0                              | 11          | 1 (14.3)                        | 7           | 0.22 (0.01, 4.80)                | 0.187        |                     |
|          | BOOST II UK    | 10 (23.8)                      | 42          | 6 (15.0)                        | 40          | 1.59 (0.64, 1.96)                | 0.298        |                     |
|          | BOOST II AUS   | 14 (25.0)                      | 56          | 5 (9.1)                         | 55          | 2.75 (1.06, 7.12)                | 0.022        |                     |
|          | <b>NeOProM</b> | <b>52 (27.4)</b>               | <b>190</b>  | <b>33 (17.3)</b>                | <b>191</b>  | <b>1.18 (1.12, 2.38)</b>         | <b>0.010</b> |                     |

### Death by discharge

|          |                | Lower Oxygen Saturation Target |             | Higher Oxygen Saturation Target |             | Adjusted* Relative Risk (95% CI) |              |                     |
|----------|----------------|--------------------------------|-------------|---------------------------------|-------------|----------------------------------|--------------|---------------------|
| Subgroup | Trial          | n (%)                          | N           | n (%)                           | N           | Adjusted RR                      | p-value      | interaction p-value |
| SGA      | SUPPORT        | 107 (17.5)                     | 613         | 93 (15.3)                       | 607         | 1.16 (0.90, 1.51)                | 0.254        | 0.159               |
| SUPPORT  | COT            | 83 (14.8)                      | 562         | 76 (13.5)                       | 565         | 1.09 (0.82, 1.45)                | 0.531        |                     |
| Defined  | BOOST II NZ    | 20 (12.6)                      | 159         | 22 (13.5)                       | 163         | 0.94 (0.56, 1.60)                | 0.828        |                     |
| No       | BOOST II UK    | 102 (23.1)                     | 442         | 85 (19.2)                       | 443         | 1.19 (0.92, 1.54)                | 0.174        |                     |
|          | BOOST II AUS   | 83 (16.2)                      | 511         | 75 (14.6)                       | 512         | 1.11 (0.83, 1.48)                | 0.483        |                     |
|          | <b>NeOProM</b> | <b>395 (17.3)</b>              | <b>2287</b> | <b>351 (15.3)</b>               | <b>2290</b> | <b>1.13 (0.99, 1.29)</b>         | <b>0.068</b> |                     |
| Yes      | SUPPORT        | 23 (56.1)                      | 41          | 14 (25.5)                       | 55          | 2.18 (1.29, 3.70)                | 0.004        |                     |
|          | COT            | 12 (30.0)                      | 40          | 11 (32.4)                       | 34          | 0.93 (0.47, 1.83)                | 0.827        |                     |
|          | BOOST II NZ    | 1 (9.1)                        | 11          | 2 (28.6)                        | 7           | 0.32 (0.04, 2.89)                | 0.309        |                     |
|          | BOOST II UK    | 13 (31.0)                      | 42          | 11 (27.5)                       | 40          | 1.13 (0.57, 2.21)                | 0.456        |                     |
|          | BOOST II AUS   | 16 (28.6)                      | 56          | 8 (14.5)                        | 55          | 1.96 (0.92, 4.21)                | 0.493        |                     |
|          | <b>NeOProM</b> | <b>65 (34.2)</b>               | <b>190</b>  | <b>46 (24.1)</b>                | <b>191</b>  | <b>1.46 (1.07, 2.00)</b>         | <b>0.020</b> |                     |

### Bayley-III language and/or cognitive <85

|          |                | Lower Oxygen Saturation Target |             | Higher Oxygen Saturation Target |             | Adjusted* Relative Risk (95% CI) |              |                     |
|----------|----------------|--------------------------------|-------------|---------------------------------|-------------|----------------------------------|--------------|---------------------|
| Subgroup | Trial          | n (%)                          | N           | n (%)                           | N           | Adjusted RR                      | p-value      | interaction p-value |
| SGA      | SUPPORT        | 212 (46.5)                     | 456         | 227 (48.6)                      | 467         | 0.95 (0.83, 1.10)                | 0.502        | 0.847               |
| SUPPORT  | COT            | 176 (39.4)                     | 447         | 179 (39.3)                      | 456         | 0.98 (0.84, 1.14)                | 0.804        |                     |
| Defined  | BOOST II NZ    | 29 (27.4)                      | 106         | 36 (32.7)                       | 110         | 0.82 (0.54, 1.24)                | 0.353        |                     |
| No       | BOOST II UK    | 75 (32.8)                      | 229         | 69 (29.0)                       | 238         | 1.17 (0.89, 1.54)                | 0.249        |                     |
|          | BOOST II AUS   | 108 (29.2)                     | 370         | 101 (26.2)                      | 385         | 1.11 (0.89, 1.39)                | 0.340        |                     |
|          | <b>NeOProM</b> | <b>600 (37.3)</b>              | <b>1608</b> | <b>612 (37.0)</b>               | <b>1656</b> | <b>1.00 (0.92, 1.09)</b>         | <b>0.997</b> |                     |
| Yes      | SUPPORT        | 9 (56.3)                       | 16          | 25 (65.8)                       | 38          | 0.86 (0.53, 1.41)                | 0.558        |                     |
|          | COT            | 13 (48.1)                      | 27          | 11 (50.0)                       | 22          | 0.96 (0.54, 1.71)                | 0.897        |                     |
|          | BOOST II NZ    | 5 (50.0)                       | 10          | 1 (25.0)                        | 4           | 2.00 (0.33, 12.2)                | 0.452        |                     |
|          | BOOST II UK    | 4 (25.0)                       | 16          | 9 (42.9)                        | 21          | 0.58 (0.22, 1.56)                | 0.282        |                     |
|          | BOOST II AUS   | 16 (44.4)                      | 36          | 14 (34.1)                       | 41          | 1.30 (0.74, 2.28)                | 0.357        |                     |
|          | <b>NeOProM</b> | <b>47 (44.8)</b>               | <b>105</b>  | <b>60 (47.6)</b>                | <b>126</b>  | <b>0.98 (0.74, 1.30)</b>         | <b>0.880</b> |                     |

### Bayley-III cognitive <85

|          |                | Lower Oxygen Saturation Target |             | Higher Oxygen Saturation Target |             | Adjusted* Relative Risk (95% CI) |              |                     |
|----------|----------------|--------------------------------|-------------|---------------------------------|-------------|----------------------------------|--------------|---------------------|
| Subgroup | Trial          | n (%)                          | N           | n (%)                           | N           | Adjusted RR                      | p-value      | interaction p-value |
| SGA      | SUPPORT        | 99 (21.8)                      | 455         | 113 (24.3)                      | 465         | 0.91 (0.71, 1.17)                | 0.478        | 0.940               |
| SUPPORT  | COT            | 85 (19.1)                      | 446         | 83 (18.2)                       | 456         | 1.02 (0.78, 1.34)                | 0.874        |                     |
| Defined  | BOOST II NZ    | 17 (16.0)                      | 106         | 12 (10.9)                       | 110         | 0.69 (0.30, 1.58)                | 0.385        |                     |
| No       | BOOST II UK    | 49 (21.4)                      | 229         | 45 (18.9)                       | 238         | 1.20 (0.83, 1.75)                | 0.338        |                     |
|          | BOOST II AUS   | 55 (14.9)                      | 370         | 45 (11.7)                       | 385         | 1.25 (0.87, 1.78)                | 0.229        |                     |
|          | <b>NeOProM</b> | <b>305 (19.0)</b>              | <b>1606</b> | <b>298 (18.0)</b>               | <b>1654</b> | <b>1.04 (0.90, 1.21)</b>         | <b>0.564</b> |                     |
| Yes      | SUPPORT        | 6 (37.5)                       | 16          | 19 (50.0)                       | 38          | 0.73 (0.36, 1.48)                | 0.383        |                     |
|          | COT            | 6 (22.2)                       | 27          | 3 (13.6)                        | 22          | 1.63 (0.46, 5.78)                | 0.450        |                     |
|          | BOOST II NZ    | 3 (30.0)                       | 10          | 0                               | 4           |                                  | ***          |                     |
|          | BOOST II UK    | 4 (25.0)                       | 16          | 4 (19.0)                        | 21          | 1.31 (0.39, 4.46)                | 0.663        |                     |
|          | BOOST II AUS   | 9 (25.0)                       | 36          | 7 (17.1)                        | 41          | 1.46 (0.61, 3.53)                | 0.396        |                     |
|          | <b>NeOProM</b> | <b>28 (26.7)</b>               | <b>105</b>  | <b>33 (26.2)</b>                | <b>126</b>  | <b>1.10 (0.72, 1.67)</b>         | <b>0.663</b> |                     |

### Bayley-III language <85

|          |                | Lower Oxygen Saturation Target |             | Higher Oxygen Saturation Target |             | Adjusted* Relative Risk (95% CI) |              |                     |
|----------|----------------|--------------------------------|-------------|---------------------------------|-------------|----------------------------------|--------------|---------------------|
| Subgroup | Trial          | n (%)                          | N           | n (%)                           | N           | Adjusted RR                      | p-value      | interaction p-value |
| SGA      | SUPPORT        | 194 (43.5)                     | 446         | 202 (43.8)                      | 461         | 0.98 (0.84, 1.14)                | 0.775        | 0.440               |
| SUPPORT  | COT            | 164 (36.9)                     | 444         | 165 (36.8)                      | 448         | 0.97 (0.83, 1.14)                | 0.745        |                     |
| Defined  | BOOST II NZ    | 29 (29.0)                      | 100         | 31 (30.4)                       | 102         | 0.90 (0.59, 1.39)                | 0.649        |                     |
| No       | BOOST II UK    | 68 (30.4)                      | 224         | 50 (22.1)                       | 226         | 1.39 (1.01, 1.91)                | 0.040        |                     |
|          | BOOST II AUS   | 96 (26.8)                      | 358         | 90 (24.0)                       | 375         | 1.12 (0.88, 1.42)                | 0.347        |                     |
|          | <b>NeOProM</b> | <b>551 (35.1)</b>              | <b>1572</b> | <b>538 (33.4)</b>               | <b>1612</b> | <b>1.03 (0.94, 1.13)</b>         | <b>0.579</b> |                     |
| Yes      | SUPPORT        | 9 (56.3)                       | 16          | 23 (62.2)                       | 37          | 0.92 (0.55, 1.52)                | 0.735        |                     |
|          | COT            | 12 (44.4)                      | 27          | 11 (50.0)                       | 22          | 0.89 (0.49, 1.61)                | 0.697        |                     |
|          | BOOST II NZ    | 4 (40.0)                       | 10          | 1 (25.0)                        | 4           | 1.60 (0.25, 10.3)                | 0.620        |                     |
|          | BOOST II UK    | 3 (18.8)                       | 16          | 9 (42.9)                        | 21          | 0.44 (0.14, 1.36)                | 0.153        |                     |
|          | BOOST II AUS   | 14 (40.0)                      | 35          | 13 (33.3)                       | 39          | 1.20 (0.66, 2.19)                | 0.552        |                     |
|          | <b>NeOProM</b> | <b>42 (40.4)</b>               | <b>104</b>  | <b>57 (46.3)</b>                | <b>123</b>  | <b>0.93 (0.69, 1.25)</b>         | <b>0.619</b> |                     |

### Bayley-III language and/or cognitive <70

|          |                | Lower Oxygen Saturation Target |             | Higher Oxygen Saturation Target |             | Adjusted* Relative Risk (95% CI) |              |                     |
|----------|----------------|--------------------------------|-------------|---------------------------------|-------------|----------------------------------|--------------|---------------------|
| Subgroup | Trial          | n (%)                          | N           | n (%)                           | N           | Adjusted RR                      | p-value      | interaction p-value |
| SGA      | SUPPORT        | 66 (14.5)                      | 456         | 78 (16.7)                       | 467         | 0.83 (0.61, 1.14)                | 0.248        | 0.128               |
| SUPPORT  | COT            | 57 (13.4)                      | 426         | 61 (13.9)                       | 440         | 0.93 (0.67, 1.29)                | 0.656        |                     |
| Defined  | BOOST II NZ    | 5 (4.7)                        | 106         | 3 (2.7)                         | 110         | 1.78 (0.44, 7.29)                | 0.422        |                     |
| No       | BOOST II UK    | 33 (14.4)                      | 229         | 25 (10.5)                       | 238         | 1.40 (0.82, 2.39)                | 0.218        |                     |
|          | BOOST II AUS   | 34 (9.2)                       | 370         | 32 (8.3)                        | 385         | 1.07 (0.68, 1.67)                | 0.769        |                     |
|          | <b>NeOProM</b> | <b>195 (12.3)</b>              | <b>1587</b> | <b>199 (12.1)</b>               | <b>1640</b> | <b>0.98 (0.81, 1.18)</b>         | <b>0.809</b> |                     |
| Yes      | SUPPORT        | 6 (37.5)                       | 16          | 17 (44.7)                       | 38          | 0.82 (0.40, 1.69)                | 0.587        |                     |
|          | COT            | 3 (11.1)                       | 27          | 4 (19.0)                        | 21          | 0.58 (0.15, 2.33)                | 0.445        |                     |
|          | BOOST II NZ    | 2 (20.0)                       | 10          | 1 (25.0)                        | 4           | 0.80 (0.10, 6.54)                | 0.835        |                     |
|          | BOOST II UK    | 1 (6.3)                        | 16          | 4 (19.0)                        | 21          | 0.33 (0.04, 2.66)                | 0.297        |                     |
|          | BOOST II AUS   | 4 (11.1)                       | 36          | 7 (17.1)                        | 41          | 0.65 (0.21, 2.04)                | 0.462        |                     |
|          | <b>NeOProM</b> | <b>16 (15.2)</b>               | <b>105</b>  | <b>33 (26.4)</b>                | <b>125</b>  | <b>0.69 (0.40, 1.17)</b>         | <b>0.166</b> |                     |

### Bayley-III cognitive <70

|          |                | Lower Oxygen Saturation Target |             | Higher Oxygen Saturation Target |             | Adjusted* Relative Risk (95% CI) |              |                     |
|----------|----------------|--------------------------------|-------------|---------------------------------|-------------|----------------------------------|--------------|---------------------|
| Subgroup | Trial          | n (%)                          | N           | n (%)                           | N           | Adjusted RR                      | p-value      | interaction p-value |
| SGA      | SUPPORT        | 29 (6.4)                       | 455         | 31 (6.7)                        | 465         | 0.92 (0.55, 1.54)                | 0.757        | 0.508               |
| SUPPORT  | COT            | 24 (5.6)                       | 430         | 35 (8.0)                        | 440         | 0.60 (0.35, 1.02)                | 0.057        |                     |
| Defined  | BOOST II NZ    | 4 (3.8)                        | 106         | 1 (0.9)                         | 110         | 4.14 (0.48, 35.7)                | 0.196        |                     |
| No       | BOOST II UK    | 22 (9.6)                       | 229         | 12 (5.0)                        | 238         | 1.97 (0.92, 4.25)                | 0.083        |                     |
|          | BOOST II AUS   | 15 (4.1)                       | 370         | 10 (2.6)                        | 385         | 1.56 (0.71, 3.43)                | 0.263        |                     |
|          | <b>NeOProM</b> | <b>94 (5.9)</b>                | <b>1590</b> | <b>89 (5.4)</b>                 | <b>1638</b> | <b>1.05 (0.78, 1.41)</b>         | <b>0.758</b> |                     |
| Yes      | SUPPORT        | 5 (31.3)                       | 16          | 7 (18.4)                        | 38          | 1.68 (0.63, 4.52)                | 0.304        |                     |
|          | COT            | 0                              | 27          | 2 (9.5)                         | 21          |                                  | ***          |                     |
|          | BOOST II NZ    | 1 (10.0)                       | 10          | 0                               | 4           |                                  | ***          |                     |
|          | BOOST II UK    | 1 (6.3)                        | 16          | 2 (9.5)                         | 21          | 0.66 (0.07, 6.62)                | 0.721        |                     |
|          | BOOST II AUS   | 2 (5.6)                        | 36          | 4 (9.8)                         | 41          | 0.57 (0.11, 2.93)                | 0.500        |                     |
|          | <b>NeOProM</b> | <b>9 (8.6)</b>                 | <b>105</b>  | <b>15 (12.0)</b>                | <b>125</b>  | <b>0.96 (0.43, 2.16)</b>         | <b>0.925</b> |                     |

### Bayley-III language <70

|          |                | Lower Oxygen Saturation Target |             | Higher Oxygen Saturation Target |             | Adjusted* Relative Risk (95% CI) |              |                     |
|----------|----------------|--------------------------------|-------------|---------------------------------|-------------|----------------------------------|--------------|---------------------|
| Subgroup | Trial          | n (%)                          | N           | n (%)                           | N           | Adjusted RR                      | p-value      | interaction p-value |
| SGA      | SUPPORT        | 63 (14.1)                      | 446         | 69 (15.0)                       | 461         | 0.91 (0.66, 1.27)                | 0.585        | 0.080               |
| SUPPORT  | COT            | 54 (12.8)                      | 423         | 53 (12.2)                       | 433         | 1.02 (0.72, 1.44)                | 0.918        |                     |
| Defined  | BOOST II NZ    | 5 (5.0)                        | 100         | 2 (2.0)                         | 102         | 2.74 (0.54, 13.8)                | 0.222        |                     |
| No       | BOOST II UK    | 31 (13.8)                      | 224         | 22 (9.7)                        | 226         | 1.44 (0.80, 2.59)                | 0.222        |                     |
|          | BOOST II AUS   | 32 (8.9)                       | 358         | 29 (7.7)                        | 375         | 1.13 (0.72, 1.80)                | 0.590        |                     |
|          | <b>NeOProM</b> | <b>185 (11.9)</b>              | <b>1551</b> | <b>175 (11.0)</b>               | <b>1597</b> | <b>1.06 (0.87, 1.29)</b>         | <b>0.574</b> |                     |
| Yes      | SUPPORT        | 6 (37.5)                       | 16          | 16 (43.2)                       | 37          | 0.85 (0.41, 1.76)                | 0.656        |                     |
|          | COT            | 3 (11.5)                       | 26          | 4 (19.0)                        | 21          | 0.61 (0.15, 2.41)                | 0.477        |                     |
|          | BOOST II NZ    | 2 (20.0)                       | 10          | 1 (25.0)                        | 4           | 0.80 (0.10, 6.54)                | 0.835        |                     |
|          | BOOST II UK    | 1 (6.3)                        | 16          | 4 (19.0)                        | 21          | 0.33 (0.04, 2.66)                | 0.297        |                     |
|          | BOOST II AUS   | 3 (8.6)                        | 35          | 6 (15.4)                        | 39          | 0.56 (0.15, 2.06)                | 0.381        |                     |
|          | <b>NeOProM</b> | <b>15 (14.6)</b>               | <b>103</b>  | <b>31 (25.4)</b>                | <b>122</b>  | <b>0.68 (0.39, 1.18)</b>         | <b>0.174</b> |                     |

## Sensitivity analyses

eTable 34. Primary and secondary outcomes using random effects models

### Random effects models

| Outcome                                                                                        | RR (95% CI)         | p-value |
|------------------------------------------------------------------------------------------------|---------------------|---------|
| Death or major disability using Bayley-III assessment only with CP (GMFCS $\geq$ 2 or unknown) | 1.03 (0.98, 1.10)   | 0.2370  |
| Death or major disability using surrogate cognitive function test where Bayley-III unava       | 1.04 (0.98, 1.10)   | 0.2169  |
| Death prior to 18-24 months corrected age                                                      | 1.17 (1.03, 1.31)   | 0.0124  |
| Major disability (as per protocol)^ by 18-24 months corrected age                              | 1.00 (0.92, 1.09)   | 0.9737  |
| Bayley III Developmental Assessment cognitive score <85 and/or language score <85              | 1.00 (0.91, 1.09)   | 0.9480  |
| Major disability (using supplementary data) by 18-24 months corrected age                      | 1.00 (0.93, 1.09)   | 0.9060  |
| Cerebral Palsy with GMFCS $\geq$ 2 (if known) or with GMFCS unknown                            | 1.02 (0.79, 1.33)   | 0.8673  |
| Deafness requiring hearing aids or worse                                                       | 1.04 (0.73, 1.48)   | 0.8328  |
| Severe visual impairment as defined by trialists                                               | 1.13 (0.64, 2.01)   | 0.6712  |
| Death prior to 36 weeks postmenstrual age                                                      | 1.18 (1.03, 1.34)   | 0.0160  |
| Death prior to discharge                                                                       | 1.16 (1.03, 1.32)   | 0.0171  |
| Patent ductus arteriosus (PDA) diagnosed by ultrasound and receiving medical or surgical       | 1.01 (0.95, 1.08)   | 0.6988  |
| Patent ductus arteriosus (PDA) receiving surgical treatment                                    | 1.17 (0.99, 1.38)   | 0.0633  |
| ROP                                                                                            | 0.73 (0.62, 0.86)   | 0.0002  |
| Necrotising enterocolitis (NEC) receiving surgery or leading to death?                         | 1.33 (1.10, 1.61)   | 0.0031  |
| Supplemental oxygen use at 36 weeks' postmenstrual age                                         | 0.82 (0.74, 0.90)   | 0.0001  |
| One or more re-admission to hospital (medical or surgical) by 18-24 months                     | 1.01 (0.95, 1.07)   | 0.7351  |
| Bayley-III Language Composite Score                                                            | -0.04 (-1.11, 1.02) | 0.9382  |
| Bayley-III Cognition Composite Score                                                           | 0.13 (-0.83, 1.09)  | 0.7878  |
| PMA infant ceased use of positive airway pressure                                              | 0.09 (-0.32, 0.50)  | 0.6712  |
| PMA infant ceased use of positive airway pressure                                              | 0.09 (-0.33, 0.50)  | 0.6865  |
| PMA infant ceased use of supplemental oxygen with                                              | -0.54 (-1.47, 0.38) | 0.2502  |
| PMA infant ceased home oxygen                                                                  | -0.47 (-5.35, 4.41) | 0.8521  |
| Weight z-score at 36 weeks (postmenstrual age)                                                 | -0.05 (-0.16, 0.06) | 0.3497  |
| Weight z-score at discharge (corrected age)                                                    | -0.06 (-0.14, 0.02) | 0.1303  |
| Weight z-score at 18-24 months (corrected age)                                                 | 0.01 (-0.08, 0.09)  | 0.8959  |

## References

1. Kramer MS, Platt RW, Wen SW, et al. A new and improved population-based Canadian reference for birth weight for gestational age. *Pediatrics*. 2001;108(2):E35.
2. Askie LM, Brocklehurst P, Darlow BA, et al. NeOProM: Neonatal Oxygenation Prospective Meta-analysis Collaboration study protocol. *BMC Pediatrics*. 2011;11(6).
3. Australian New Zealand Clinical Trials Registry [Internet], NHMRC Clinical Trials Centre, University of Sydney, Australia. Identifier ACTRN12605000055606, Which oxygen saturation level should we use for very premature infants? A randomised controlled trial to investigate the effect of two slightly different oxygen levels on the health of very premature infants; 2005 Aug 1 [cited 2018 Mar 12]. Available from <http://www.anzctr.org.au/ACTRN12605000055606.aspx>.
4. Current Controlled Trials [Internet], London: BioMed Central. ISRCTN00842661, Which oxygen saturation level should we use for very premature infants? A randomised controlled trial. 2006 Mar 23 [cited 2018 Mar 12]. Available from: <http://www.isrctn.com/ISRCTN00842661>.
5. Australian New Zealand Clinical Trials Registry [Internet], NHMRC Clinical Trials Centre, University of Sydney, Australia. Identifier ACTRN12605000253606, A randomised phase III study to evaluate whether a lower versus a higher oxygen saturation target in infants of <28 weeks gestation is associated with a reduction in death or disability at 2 years of age; 2005 Sep 1 [cited 2018 Mar 12]. Available from <http://www.anzctr.org.au/ACTRN12605000253606.aspx>.
6. ClinicalTrials.gov [Internet], Bethesda (MD): National Library of Medicine (US). Identifier NCT00287391, Surfactant Positive Airway Pressure and Pulse Oximetry Trial (SUPPORT) 2005 Oct 3 [cited 2018 Mar 12]. Available from: <https://clinicaltrials.gov/ct2/show/NCT00233324>.
7. Current Controlled Trials [Internet], London: BioMed Central. ISRCTN62491227, Efficacy and safety of targeting lower arterial oxygen saturations to reduce oxygen toxicity and oxidative stress in very preterm infants: the Canadian Oxygen Trial. 2006 Aug 22 [cited 2018 Mar 12]; Available from: <http://www.isrctn.com/ISRCTN62491227>.
8. Walsh MC, Di Fiore JM, Martin RJ, Gantz M, Carlo WA, Finer N. Association of oxygen target and growth status with increased mortality in small for gestational age infants: further analysis of the Surfactant, Positive Pressure and Pulse Oximetry Randomized Trial. *JAMA Pediatrics*. 2016;170(3):292-294.
9. Alexander GR, Himes JH, Kaufman RB, Mor J, Kogan M. A United States national reference for fetal growth. *Obstet Gynecol*. 1996;87(2):163-168.
